# Supplementary material for: Distinct ossification trade-offs illuminate the shoulder girdle reconfiguration at the water-to-land transition
Source: bioRxiv preprint, doi:10.1101/2023.07.17.547998, version 1 (2023-07-17)
Supplement: Supplementary Table 3 [file 547998_file05.xlsx]

## Sheet: CNE_annotated
PeakID \	Chr	Start	End	Strand	Peak Score	Focus Ratio/Region Size	Annotation	Detailed Annotation	Distance to TSS	Nearest PromoterID	Entrez ID	Gene Name	Nearest Unigene	Nearest Refseq	Nearest Ensembl	Gene Name2	Gene Alias	Gene Description	Gene Type
CNE14_1_q0.3_peak_64248	chr5	815082	833273	+	30156	NA	TTS (ENSDART00000126982.3)	-TTS (ENSDART00000126982.3)	1743	ENSDART00000126982.3	ENSDARG00000089382	zgc.158463	ENSDART00000126982			ENSDARG00000089382.3
CNE14_1_q0.3_peak_5010	chr10	16783898	16786730	+	16863	NA	Intergenic	Intergenic	28768	ENSDART00000168624.2	ENSDARG00000105041	#N/A	ENSDART00000168624			ENSDARG00000105041.2
CNE14_1_q0.3_peak_84395	chrKN150271.1	190	1985	+	15305	NA	NA	NA	NA	NA
CNE14_1_q0.3_peak_44757	chr21	35655782	35656509	+	12767	NA	intron (ENSDART00000172245.2, intron 7 of 7)	-intron (ENSDART00000172245.2, intron 7 of 7)	-121744	ENSDART00000112308.4	ENSDARG00000074819	si.dkeyp.23e4.3	ENSDART00000193298			ENSDARG00000074819.5
CNE14_1_q0.3_peak_36674	chr2	31714174	31715658	+	12456	NA	Intergenic	Intergenic	-3369	ENSDART00000189763.1	ENSDARG00000078535	lrrcc1	ENSDART00000189763			ENSDARG00000078535.6
CNE14_1_q0.3_peak_23783	chr16	25920943	25924124	+	11926	NA	Intergenic	Intergenic	55530	ENSDART00000189762.1	ENSDARG00000014975	LOC100333286	ENSDART00000059126			ENSDARG00000014975.8
CNE14_1_q0.3_peak_72745	chr7	4271122	4271433	+	10697	NA	Intergenic	Intergenic	-7562	ENSDART00000173260.2	ENSDARG00000105343	#N/A	ENSDART00000182026			ENSDARG00000105343.2
CNE14_1_q0.3_peak_62607	chr4	42937981	42938298	+	8771	NA	Intergenic	Intergenic	59583	ENSDART00000171047.2	ENSDARG00000098279	#N/A	ENSDART00000171047			ENSDARG00000098279.2
CNE14_1_q0.3_peak_27714	chr17	39940416	39943739	+	7637	NA	Intergenic	Intergenic	-55449	ENSDART00000002217.6	ENSDARG00000013134	prph2la	ENSDART00000184030			ENSDARG00000013134.6
CNE14_1_q0.3_peak_7761	chr11	15106826	15150933	+	7248	NA	Intergenic	Intergenic	-38315	ENSDART00000162079.2	ENSDARG00000104204	slc1a8a	ENSDART00000171118			ENSDARG00000104204.2
CNE14_1_q0.3_peak_4761	chr10	12048142	12124236	+	6461	NA	Intergenic	Intergenic	-245836	ENSDART00000127581.3	ENSDARG00000069420	trim23	ENSDART00000127581			ENSDARG00000069420.7
CNE14_1_q0.3_peak_5012	chr10	16793989	16795298	+	5818	NA	Intergenic	Intergenic	38097	ENSDART00000168624.2	ENSDARG00000105041	#N/A	ENSDART00000168624			ENSDARG00000105041.2
CNE14_1_q0.3_peak_84485	chrKN150411.1	9792	18112	+	5733	NA	NA	NA	NA	NA
CNE14_1_q0.3_peak_5011	chr10	16789086	16790336	+	5630	NA	Intergenic	Intergenic	33165	ENSDART00000168624.2	ENSDARG00000105041	#N/A	ENSDART00000168624			ENSDARG00000105041.2
CNE14_1_q0.3_peak_75312	chr7	59531175	59533634	+	5522	NA	Intergenic	Intergenic	-16746	ENSDART00000163745.2	ENSDARG00000098605	slx1b	ENSDART00000163745			ENSDARG00000098605.2
CNE14_1_q0.3_peak_36129	chr2	14660208	14857473	+	5487	NA	Intergenic	Intergenic	-8637	ENSDART00000120574.2	ENSDARG00000085174	#N/A	ENSDART00000120574			ENSDARG00000085174.2
CNE14_1_q0.3_peak_55811	chr25	18781860	18868073	+	5456	NA	Intergenic	Intergenic	-46610	ENSDART00000111425.4	ENSDARG00000076191	fbxl13	ENSDART00000111425			ENSDARG00000076191.4
CNE14_1_q0.3_peak_62970	chr4	54667753	54668080	+	5043	NA	Intergenic	Intergenic	22262	ENSDART00000192864.1	ENSDARG00000104968	#N/A	ENSDART00000190527			ENSDARG00000104968.2
CNE14_1_q0.3_peak_84201	chrKN150031.1	11700	12081	+	5000	NA	NA	NA	NA	NA
CNE14_1_q0.3_peak_44760	chr21	35670542	35670904	+	4672	NA	intron (ENSDART00000172245.2, intron 7 of 7)	-intron (ENSDART00000172245.2, intron 7 of 7)	-136322	ENSDART00000112308.4	ENSDARG00000074819	si.dkeyp.23e4.3	ENSDART00000193298			ENSDARG00000074819.5
CNE14_1_q0.3_peak_59724	chr3	50817999	50830654	+	4537	NA	Intergenic	Intergenic	39044	ENSDART00000169771.2	ENSDARG00000105223	pmp22a	ENSDART00000164295			ENSDARG00000105223.2
CNE14_1_q0.3_peak_27709	chr17	39901613	39910367	+	4476	NA	Intergenic	Intergenic	-19362	ENSDART00000002217.6	ENSDARG00000013134	prph2la	ENSDART00000184030			ENSDARG00000013134.6
CNE14_1_q0.3_peak_56097	chr25	26064763	26402283	+	4319	NA	Intergenic	Intergenic	-167139	ENSDART00000150317.2	ENSDARG00000096101	#N/A	ENSDART00000150317			ENSDARG00000096101.2
CNE14_1_q0.3_peak_52620	chr24	12237713	12566030	+	4162	NA	Intergenic	Intergenic	201611	ENSDART00000181391.1	ENSDARG00000110005	#N/A	ENSDART00000181391			ENSDARG00000110005.1
CNE14_1_q0.3_peak_27712	chr17	39928654	39931273	+	4130	NA	Intergenic	Intergenic	-43335	ENSDART00000002217.6	ENSDARG00000013134	prph2la	ENSDART00000184030			ENSDARG00000013134.6
CNE14_1_q0.3_peak_42750	chr20	55166504	55168545	+	4061	NA	Intergenic	Intergenic	2365	ENSDART00000151198.3	ENSDARG00000096403	#N/A	ENSDART00000151198			ENSDARG00000096403.3
CNE14_1_q0.3_peak_72743	chr7	4264483	4264823	+	3975	NA	Intergenic	Intergenic	-14186	ENSDART00000173260.2	ENSDARG00000105343	#N/A	ENSDART00000182026			ENSDARG00000105343.2
CNE14_1_q0.3_peak_20073	chr15	14235224	14235734	+	3939	NA	Intergenic	Intergenic	12568	ENSDART00000164762.2	ENSDARG00000104960	LOC100535857	ENSDART00000164762			ENSDARG00000104960.2
CNE14_1_q0.3_peak_57389	chr3	1106807	1107211	+	3933	NA	promoter-TSS (ENSDART00000092690.7)	-promoter-TSS (ENSDART00000092690.7)	-93	ENSDART00000092690.7	ENSDARG00000063438	srebf2	ENSDART00000092690			ENSDARG00000063438.7
CNE14_1_q0.3_peak_53967	chr24	38292435	38292822	+	3899	NA	Intergenic	Intergenic	-3745	ENSDART00000169988.2	ENSDARG00000105001	zgc.91999	ENSDART00000169988			ENSDARG00000105001.2
CNE14_1_q0.3_peak_72741	chr7	4256423	4257509	+	3718	NA	Intergenic	Intergenic	13693	ENSDART00000139823.4	ENSDARG00000105334	si.ch211.63p21.5	ENSDART00000172752			ENSDARG00000105334.2
CNE14_1_q0.3_peak_75391	chr7	62080213	62080630	+	3637	NA	promoter-TSS (ENSDART00000092580.7)	-promoter-TSS (ENSDART00000092580.7)	-35	ENSDART00000092580.7	ENSDARG00000052091	rbpjb	ENSDART00000092580			ENSDARG00000052091.7
CNE14_1_q0.3_peak_14652	chr13	45524118	45524644	+	3628	NA	promoter-TSS (ENSDART00000019113.8)	-promoter-TSS (ENSDART00000019113.8)	-94	ENSDART00000074567.5	ENSDARG00000012741	maco1b	ENSDART00000074567			ENSDARG00000012741.11
CNE14_1_q0.3_peak_37547	chr2	49428894	49429286	+	3575	NA	intron (ENSDART00000122742.3, intron 1 of 9)	-intron (ENSDART00000122742.3, intron 1 of 9)	11190	ENSDART00000160783.2	ENSDARG00000017780	rorcb	ENSDART00000122742			ENSDARG00000017780.11
CNE14_1_q0.3_peak_58092	chr3	9672010	9672346	+	3573	NA	intron (ENSDART00000168234.3, intron 5 of 30)	-intron (ENSDART00000168234.3, intron 5 of 30)	50425	ENSDART00000168234.3	ENSDARG00000112452	crebbpb	ENSDART00000168234			ENSDARG00000112452.1
CNE14_1_q0.3_peak_20072	chr15	14232425	14233069	+	3516	NA	Intergenic	Intergenic	15300	ENSDART00000164762.2	ENSDARG00000104960	LOC100535857	ENSDART00000164762			ENSDARG00000104960.2
CNE14_1_q0.3_peak_57676	chr3	5228009	5228466	+	3412	NA	promoter-TSS (ENSDART00000137105.3)	-promoter-TSS (ENSDART00000137105.3)	-100	ENSDART00000137105.3	ENSDARG00000001014	myh9b	ENSDART00000182438			ENSDARG00000001014.14
CNE14_1_q0.3_peak_78818	chr8	40270810	40271365	+	3375	NA	exon (ENSDART00000053158.6, exon 3 of 12)	-exon (ENSDART00000053158.6, exon 3 of 12)	177	ENSDART00000188931.1	ENSDARG00000036593	kdm2ba	ENSDART00000180435			ENSDARG00000036593.6
CNE14_1_q0.3_peak_51838	chr23	45769736	45770398	+	3318	NA	Intergenic	Intergenic	-15496	ENSDART00000186027.1	ENSDARG00000112923	#N/A	ENSDART00000186027			ENSDARG00000112923.1
CNE14_1_q0.3_peak_36290	chr2	19434536	19459102	+	3316	NA	Intergenic	Intergenic	-58444	ENSDART00000142876.3	ENSDARG00000057253	pimr141	ENSDART00000142876			ENSDARG00000057253.7
CNE14_1_q0.3_peak_78582	chr8	34440974	34761923	+	3305	NA	intron (ENSDART00000193944.1, intron 2 of 5)	-intron (ENSDART00000193944.1, intron 2 of 5)	-22577	ENSDART00000180772.1	ENSDARG00000110722	#N/A	ENSDART00000180772			ENSDARG00000110722.1
CNE14_1_q0.3_peak_8345	chr11	30341332	30341713	+	3274	NA	promoter-TSS (ENSDART00000078378.5)	-promoter-TSS (ENSDART00000078378.5)	-91	ENSDART00000078378.5	ENSDARG00000055966	cflara	ENSDART00000078378			ENSDARG00000055966.6
CNE14_1_q0.3_peak_2902	chr1	54764904	54765516	+	3269	NA	promoter-TSS (ENSDART00000150362.2)	-promoter-TSS (ENSDART00000150362.2)	52	ENSDART00000150362.2	ENSDARG00000096214	si.ch211.197k17.3	ENSDART00000150362			ENSDARG00000096214.2
CNE14_1_q0.3_peak_76755	chr8	1219776	1220212	+	3255	NA	promoter-TSS (ENSDART00000016800.6)	-promoter-TSS (ENSDART00000016800.6)	-179	ENSDART00000149969.3	ENSDARG00000021086	znf367	ENSDART00000016800			ENSDARG00000021086.8
CNE14_1_q0.3_peak_75005	chr7	53011095	53011877	+	3242	NA	TTS (ENSDART00000174365.2)	-TTS (ENSDART00000174365.2)	3074	ENSDART00000174022.2	ENSDARG00000104600	#N/A	ENSDART00000174224			ENSDARG00000104600.3
CNE14_1_q0.3_peak_65128	chr5	6617156	6617485	+	3211	NA	promoter-TSS (ENSDART00000060532.4)	-promoter-TSS (ENSDART00000060532.4)	-81	ENSDART00000060532.4	ENSDARG00000041299	zgc.110796	ENSDART00000060532			ENSDARG00000041299.4
CNE14_1_q0.3_peak_62344	chr4	32653084	33841649	+	3194	NA	Intergenic	Intergenic	22205	ENSDART00000150851.2	ENSDARG00000096186	#N/A	ENSDART00000150851			ENSDARG00000096186.3
CNE14_1_q0.3_peak_10551	chr12	16283812	16284164	+	3188	NA	promoter-TSS (ENSDART00000013360.6)	-promoter-TSS (ENSDART00000013360.6)	-98	ENSDART00000013360.6	ENSDARG00000014554	ppp1r3cb	ENSDART00000152500			ENSDARG00000014554.8
CNE14_1_q0.3_peak_72742	chr7	4259330	4259790	+	3150	NA	Intergenic	Intergenic	16287	ENSDART00000139823.4	ENSDARG00000105334	si.ch211.63p21.5	ENSDART00000172752			ENSDARG00000105334.2
CNE14_1_q0.3_peak_81195	chr9	9111869	9112276	+	3146	NA	promoter-TSS (ENSDART00000083033.6)	-promoter-TSS (ENSDART00000083033.6)	-87	ENSDART00000165932.3	ENSDARG00000058606	sik1	ENSDART00000165932			ENSDARG00000058606.9
CNE14_1_q0.3_peak_15292	chr13	50062508	50063085	+	3141	NA	Intergenic	Intergenic	45541	ENSDART00000133308.3	ENSDARG00000068710	nid1a	ENSDART00000133308			ENSDARG00000068710.7
CNE14_1_q0.3_peak_23388	chr16	15652619	15690158	+	3135	NA	Intergenic	Intergenic	37756	ENSDART00000159494.2	ENSDARG00000102085	#N/A	ENSDART00000159494			ENSDARG00000102085.2
CNE14_1_q0.3_peak_35471	chr2	6242866	6243444	+	3119	NA	promoter-TSS (ENSDART00000058258.4)	-promoter-TSS (ENSDART00000058258.4)	11	ENSDART00000058258.4	ENSDARG00000039830	gng5	ENSDART00000058258			ENSDARG00000039830.4
CNE14_1_q0.3_peak_75002	chr7	52993885	52996958	+	3119	NA	Intergenic	Intergenic	-12029	ENSDART00000174374.2	ENSDARG00000104600	#N/A	ENSDART00000174224			ENSDARG00000104600.3
CNE14_1_q0.3_peak_25589	chr17	329387	329740	+	3108	NA	Intergenic	Intergenic	-8238	ENSDART00000194814.1	ENSDARG00000117326	#N/A	ENSDART00000194814			ENSDARG00000117326.1
CNE14_1_q0.3_peak_24832	chr16	50090454	50090856	+	3097	NA	intron (ENSDART00000153675.3, intron 1 of 7)	-intron (ENSDART00000153675.3, intron 1 of 7)	1238	ENSDART00000153675.3	ENSDARG00000003820	nr1d2a	ENSDART00000128167			ENSDARG00000003820.11
CNE14_1_q0.3_peak_21566	chr15	44465305	44465935	+	3067	NA	promoter-TSS (ENSDART00000054605.7)	-promoter-TSS (ENSDART00000054605.7)	59	ENSDART00000054605.7	ENSDARG00000037501	aasdhppt	ENSDART00000054605			ENSDARG00000037501.7
CNE14_1_q0.3_peak_56169	chr25	28279352	28279773	+	3057	NA	promoter-TSS (ENSDART00000073502.5)	-promoter-TSS (ENSDART00000073502.5)	-15	ENSDART00000073502.5	ENSDARG00000051816	aass	ENSDART00000164502			ENSDARG00000051816.6
CNE14_1_q0.3_peak_13567	chr13	15484699	15535257	+	3045	NA	Intergenic	Intergenic	70174	ENSDART00000162686.2	ENSDARG00000104963	#N/A	ENSDART00000162686			ENSDARG00000104963.2
CNE14_1_q0.3_peak_75003	chr7	53001700	53004199	+	3024	NA	Intergenic	Intergenic	-4501	ENSDART00000174374.2	ENSDARG00000104600	#N/A	ENSDART00000174224			ENSDARG00000104600.3
CNE14_1_q0.3_peak_84322	chrKN150171.1	130178	130498	+	3023	NA	NA	NA	NA	NA
CNE14_1_q0.3_peak_28065	chr17	46466479	46496315	+	3020	NA	Intergenic	Intergenic	-23775	ENSDART00000130215.4	ENSDARG00000090064	tmem179	ENSDART00000130215			ENSDARG00000090064.4
CNE14_1_q0.3_peak_47713	chr22	32228703	32229113	+	3017	NA	promoter-TSS (ENSDART00000092082.7)	-promoter-TSS (ENSDART00000092082.7)	26	ENSDART00000092082.7	ENSDARG00000063177	manf	ENSDART00000092082			ENSDARG00000063177.7
CNE14_1_q0.3_peak_44792	chr21	36623215	36623605	+	3007	NA	exon (ENSDART00000027459.10, exon 1 of 16)	-exon (ENSDART00000027459.10, exon 1 of 16)	248	ENSDART00000027459.10	ENSDARG00000032157	grk6	ENSDART00000027459			ENSDARG00000032157.8
CNE14_1_q0.3_peak_5014	chr10	16800494	16803039	+	2934	NA	Intergenic	Intergenic	45220	ENSDART00000168624.2	ENSDARG00000105041	#N/A	ENSDART00000168624			ENSDARG00000105041.2
CNE14_1_q0.3_peak_72401	chr7	7616	8405	+	2916	NA	TTS (ENSDART00000183213.1)	-TTS (ENSDART00000183213.1)	357	ENSDART00000183213.1	ENSDARG00000114910	#N/A	ENSDART00000183213			ENSDARG00000114910.1
CNE14_1_q0.3_peak_1046	chr1	14454355	14454715	+	2908	NA	promoter-TSS (ENSDART00000005067.10)	-promoter-TSS (ENSDART00000005067.10)	-128	ENSDART00000005067.10	ENSDARG00000003398	rbpja	ENSDART00000005067			ENSDARG00000003398.11
CNE14_1_q0.3_peak_33321	chr19	20216621	20217038	+	2876	NA	intron (ENSDART00000133633.3, intron 2 of 5)	-intron (ENSDART00000010140.7, intron 3 of 14)	15236	ENSDART00000163026.2	ENSDARG00000010266	igf2bp3	ENSDART00000010140			ENSDARG00000010266.9
CNE14_1_q0.3_peak_64495	chr5	2810084	2810633	+	2874	NA	Intergenic	Intergenic	-4663	ENSDART00000020472.8	ENSDARG00000018351	hpda	ENSDART00000020472			ENSDARG00000018351.10
CNE14_1_q0.3_peak_37509	chr2	48375340	48375742	+	2869	NA	promoter-TSS (ENSDART00000148788.3)	-promoter-TSS (ENSDART00000148788.3)	-199	ENSDART00000148788.3	ENSDARG00000034503	per2	ENSDART00000098004			ENSDARG00000034503.10
CNE14_1_q0.3_peak_36289	chr2	19423163	19433842	+	2861	NA	Intergenic	Intergenic	-65341	ENSDART00000162512.2	ENSDARG00000102223	#N/A	ENSDART00000162512			ENSDARG00000102223.2
CNE14_1_q0.3_peak_4939	chr10	14929588	14929974	+	2856	NA	promoter-TSS (ENSDART00000044756.6)	-promoter-TSS (ENSDART00000044756.6)	-102	ENSDART00000147653.3	ENSDARG00000006389	smad2	ENSDART00000121892			ENSDARG00000006389.8
CNE14_1_q0.3_peak_2911	chr1	54971979	54972755	+	2839	NA	promoter-TSS (ENSDART00000038330.9)	-promoter-TSS (ENSDART00000038330.9)	-131	ENSDART00000038330.9	ENSDARG00000026489	khsrp	ENSDART00000140016			ENSDARG00000026489.10
CNE14_1_q0.3_peak_15843	chr14	1355586	1355919	+	2839	NA	promoter-TSS (ENSDART00000060417.7)	-promoter-TSS (ENSDART00000060417.7)	-105	ENSDART00000188008.1	ENSDARG00000016112	bbs12	ENSDART00000188008			ENSDARG00000016112.8
CNE14_1_q0.3_peak_26501	chr17	5766143	6181580	+	2805	NA	Intergenic	Intergenic	-2822	ENSDART00000110276.3	ENSDARG00000074014	zgc.194275	ENSDART00000110276			ENSDARG00000074014.3
CNE14_1_q0.3_peak_23784	chr16	25927313	25934941	+	2779	NA	Intergenic	Intergenic	46936	ENSDART00000189762.1	ENSDARG00000014975	LOC100333286	ENSDART00000059126			ENSDARG00000014975.8
CNE14_1_q0.3_peak_54302	chr24	40512853	40513315	+	2770	NA	Intergenic	Intergenic	-16262	ENSDART00000168548.2	ENSDARG00000101687	LOC100001114	ENSDART00000168548			ENSDARG00000101687.2
CNE14_1_q0.3_peak_1420	chr1	25801392	25801756	+	2769	NA	promoter-TSS (ENSDART00000129471.3)	-promoter-TSS (ENSDART00000129471.3)	-74	ENSDART00000129471.3	ENSDARG00000086790	gucy1b1	ENSDART00000129471			ENSDARG00000086790.3
CNE14_1_q0.3_peak_25662	chr17	956961	957698	+	2745	NA	exon (ENSDART00000082101.6, exon 1 of 10)	-exon (ENSDART00000082101.6, exon 1 of 10)	508	ENSDART00000082101.6	ENSDARG00000059083	ppp2r5ca	ENSDART00000082101			ENSDARG00000059083.6
CNE14_1_q0.3_peak_1434	chr1	26071505	26071861	+	2744	NA	promoter-TSS (ENSDART00000059264.6)	-promoter-TSS (ENSDART00000059264.6)	-148	ENSDART00000185187.1	ENSDARG00000021702	pdcd4a	ENSDART00000171752			ENSDARG00000021702.10
CNE14_1_q0.3_peak_51289	chr23	39695632	39696050	+	2740	NA	promoter-TSS (ENSDART00000113893.4)	-promoter-TSS (ENSDART00000113893.4)	14	ENSDART00000186679.1	ENSDARG00000078924	tmco4	ENSDART00000113893			ENSDARG00000078924.5
CNE14_1_q0.3_peak_62008	chr4	28552409	28562878	+	2737	NA	Intergenic	Intergenic	-15508	ENSDART00000178343.2	ENSDARG00000106572	#N/A	ENSDART00000178343			ENSDARG00000106572.2
CNE14_1_q0.3_peak_5789	chr10	39212721	39213032	+	2733	NA	promoter-TSS (ENSDART00000159501.2)	-promoter-TSS (ENSDART00000159501.2)	-22	ENSDART00000159501.2	ENSDARG00000104953	stt3a	ENSDART00000159501			ENSDARG00000104953.3
CNE14_1_q0.3_peak_5786	chr10	39083705	39084360	+	2726	NA	promoter-TSS (ENSDART00000158245.2)	-promoter-TSS (ENSDART00000158245.2)	-322	ENSDART00000158245.2	ENSDARG00000103919	si.ch73.1a9.3	ENSDART00000158245			ENSDARG00000103919.2
CNE14_1_q0.3_peak_1919	chr1	33217685	33218148	+	2725	NA	promoter-TSS (ENSDART00000136761.3)	-promoter-TSS (ENSDART00000136761.3)	5	ENSDART00000136761.3	ENSDARG00000060716	prkx	ENSDART00000136761			ENSDARG00000060716.7
CNE14_1_q0.3_peak_5302	chr10	26163705	26164196	+	2703	NA	promoter-TSS (ENSDART00000136472.3)	-promoter-TSS (ENSDART00000136472.3)	39	ENSDART00000136472.3	ENSDARG00000005397	trim3b	ENSDART00000143734			ENSDARG00000005397.11
CNE14_1_q0.3_peak_24569	chr16	45930591	45931173	+	2675	NA	promoter-TSS (ENSDART00000041811.8)	-promoter-TSS (ENSDART00000041811.8)	-80	ENSDART00000124689.4	ENSDARG00000017220	otud7b	ENSDART00000041811			ENSDARG00000017220.11
CNE14_1_q0.3_peak_60468	chr3	58455047	58455476	+	2655	NA	promoter-TSS (ENSDART00000052179.7)	-promoter-TSS (ENSDART00000052179.7)	28	ENSDART00000052179.7	ENSDARG00000035952	cdr2a	ENSDART00000052179			ENSDARG00000035952.7
CNE14_1_q0.3_peak_49421	chr23	4704954	4705440	+	2653	NA	promoter-TSS (ENSDART00000067293.6)	-promoter-TSS (ENSDART00000067293.6)	-38	ENSDART00000129050.4	ENSDARG00000045776	cnbpa	ENSDART00000144536			ENSDARG00000045776.7
CNE14_1_q0.3_peak_39714	chr20	5368885	5369392	+	2647	NA	promoter-TSS (ENSDART00000114316.5)	-promoter-TSS (ENSDART00000114316.5)	-33	ENSDART00000114316.5	ENSDARG00000074287	sptlc2b	ENSDART00000114316			ENSDARG00000074287.5
CNE14_1_q0.3_peak_24890	chr16	50433939	50434305	+	2642	NA	promoter-TSS (ENSDART00000193500.1)	-promoter-TSS (ENSDART00000193500.1)	-546	ENSDART00000193500.1	ENSDARG00000022176	zgc.110372	ENSDART00000029283			ENSDARG00000022176.10
CNE14_1_q0.3_peak_84128	chrKN149935.1	80	1475	+	2641	NA	NA	NA	NA	NA
CNE14_1_q0.3_peak_14425	chr13	40437308	40437740	+	2633	NA	promoter-TSS (ENSDART00000057090.8)	-promoter-TSS (ENSDART00000057090.8)	-26	ENSDART00000167859.2	ENSDARG00000039093	got1	ENSDART00000149955			ENSDARG00000039093.8
CNE14_1_q0.3_peak_7592	chr11	12007594	12008210	+	2632	NA	promoter-TSS (ENSDART00000111919.2)	-promoter-TSS (ENSDART00000111919.2)	99	ENSDART00000111919.2	ENSDARG00000076763	sp2	ENSDART00000111919			ENSDARG00000076763.2
CNE14_1_q0.3_peak_58208	chr3	11548298	11548759	+	2627	NA	promoter-TSS (ENSDART00000059117.7)	-promoter-TSS (ENSDART00000059117.7)	12	ENSDART00000059117.7	ENSDARG00000040387	mmd	ENSDART00000059117			ENSDARG00000040387.7
CNE14_1_q0.3_peak_5638	chr10	36026278	36026636	+	2623	NA	promoter-TSS (ENSDART00000193786.1)	-promoter-TSS (ENSDART00000193786.1)	-119	ENSDART00000193786.1	ENSDARG00000099175	hmgb1a	ENSDART00000193786			ENSDARG00000099175.3
CNE14_1_q0.3_peak_78583	chr8	34765880	34767598	+	2623	NA	intron (ENSDART00000164901.2, intron 4 of 5)	-intron (ENSDART00000164901.2, intron 4 of 5)	673	ENSDART00000164901.2	ENSDARG00000101243	#N/A	ENSDART00000164901			ENSDARG00000101243.2
CNE14_1_q0.3_peak_6008	chr10	41765724	41766398	+	2620	NA	intron (ENSDART00000170682.2, intron 1 of 6)	-intron (ENSDART00000170682.2, intron 1 of 6)	117	ENSDART00000171484.2	ENSDARG00000054036	rnf34b	ENSDART00000171484			ENSDARG00000054036.6
CNE14_1_q0.3_peak_24262	chr16	39477483	39478107	+	2614	NA	promoter-TSS (ENSDART00000102525.5)	-promoter-TSS (ENSDART00000102525.5)	-49	ENSDART00000102525.5	ENSDARG00000001890	stt3b	ENSDART00000102525			ENSDARG00000001890.11
CNE14_1_q0.3_peak_962	chr1	12347970	12348466	+	2606	NA	promoter-TSS (ENSDART00000067082.5)	-promoter-TSS (ENSDART00000067082.5)	5	ENSDART00000144920.3	ENSDARG00000045618	clta	ENSDART00000144475			ENSDARG00000045618.6
CNE14_1_q0.3_peak_53825	chr24	36830782	36831193	+	2603	NA	Intergenic	Intergenic	-4483	ENSDART00000112694.4	ENSDARG00000079656	LOC797104	ENSDART00000112694			ENSDARG00000079656.4
CNE14_1_q0.3_peak_60678	chr3	60033979	60037772	+	2591	NA	exon (ENSDART00000153642.2, exon 2 of 2)	-exon (ENSDART00000153642.2, exon 2 of 2)	1654	ENSDART00000153642.2	ENSDARG00000076807	si.ch211.110e21.4	ENSDART00000189858			ENSDARG00000076807.6
CNE14_1_q0.3_peak_35168	chr2	2451753	2452184	+	2588	NA	promoter-TSS (ENSDART00000101033.4)	-promoter-TSS (ENSDART00000101033.4)	-787	ENSDART00000101033.4	ENSDARG00000020957	pth1r	ENSDART00000147808			ENSDARG00000020957.11
CNE14_1_q0.3_peak_766	chr1	6494340	6494703	+	2584	NA	promoter-TSS (ENSDART00000109356.3)	-promoter-TSS (ENSDART00000109356.3)	-137	ENSDART00000109356.3	ENSDARG00000073857	klf7a	ENSDART00000109356			ENSDARG00000073857.3
CNE14_1_q0.3_peak_5018	chr10	16818527	16820351	+	2578	NA	Intergenic	Intergenic	48772	ENSDART00000171755.2	ENSDARG00000103135	stoml2	ENSDART00000171755			ENSDARG00000103135.2
CNE14_1_q0.3_peak_57818	chr3	6519040	6519654	+	2574	NA	intron (ENSDART00000179882.1, intron 1 of 15)	-intron (ENSDART00000165273.2, intron 1 of 15)	344	ENSDART00000165273.2	ENSDARG00000098871	gga3b	ENSDART00000179882			ENSDARG00000098871.2
CNE14_1_q0.3_peak_56175	chr25	28823825	28824192	+	2547	NA	promoter-TSS (ENSDART00000067072.6)	-promoter-TSS (ENSDART00000067072.6)	56	ENSDART00000067072.6	ENSDARG00000045611	nfybb	ENSDART00000067072			ENSDARG00000045611.6
CNE14_1_q0.3_peak_8709	chr11	37049121	37049824	+	2536	NA	exon (ENSDART00000109235.3, exon 1 of 9)	-exon (ENSDART00000109235.3, exon 1 of 9)	125	ENSDART00000109235.3	ENSDARG00000075571	bicd2	ENSDART00000155408			ENSDARG00000075571.4
CNE14_1_q0.3_peak_35665	chr2	7290706	7293928	+	2535	NA	Intergenic	Intergenic	-2914	ENSDART00000134171.2	ENSDARG00000095549	si.dkeyp.106c3.2	ENSDART00000134171			ENSDARG00000095549.2
CNE14_1_q0.3_peak_40350	chr20	12917249	12917559	+	2535	NA	Intergenic	Intergenic	10171	ENSDART00000141155.2	ENSDARG00000092913	#N/A	ENSDART00000141155			ENSDARG00000092913.2
CNE14_1_q0.3_peak_54403	chr24	41220190	41220844	+	2534	NA	promoter-TSS (ENSDART00000150207.2)	-promoter-TSS (ENSDART00000150207.2)	21	ENSDART00000150207.2	ENSDARG00000044422	acvr2ba	ENSDART00000121592			ENSDARG00000044422.8
CNE14_1_q0.3_peak_84670	chrKN150670.1	72063	72614	+	2519	NA	NA	NA	NA	NA
CNE14_1_q0.3_peak_33488	chr19	23924640	23925005	+	2512	NA	Intergenic	Intergenic	5726	ENSDART00000090200.6	ENSDARG00000062382	snapin	ENSDART00000090200			ENSDARG00000062382.6
CNE14_1_q0.3_peak_69532	chr6	11876464	11876988	+	2504	NA	intron (ENSDART00000109552.3, intron 1 of 23)	-intron (ENSDART00000109552.3, intron 1 of 23)	26367	ENSDART00000178269.2	ENSDARG00000057782	baz2ba	ENSDART00000109552			ENSDARG00000057782.10
CNE14_1_q0.3_peak_9506	chr11	45287303	45287708	+	2503	NA	promoter-TSS (ENSDART00000165321.2)	-promoter-TSS (ENSDART00000165321.2)	-36	ENSDART00000165321.2	ENSDARG00000098639	pycr1b	ENSDART00000173116			ENSDARG00000098639.3
CNE14_1_q0.3_peak_1594	chr1	28263460	28263970	+	2500	NA	Intergenic	Intergenic	45297	ENSDART00000149075.2	ENSDARG00000095954	#N/A	ENSDART00000149075			ENSDARG00000095954.2
CNE14_1_q0.3_peak_15219	chr13	49721372	49721787	+	2496	NA	Intergenic	Intergenic	-5754	ENSDART00000168799.3	ENSDARG00000023627	ggps1	ENSDART00000168799			ENSDARG00000023627.8
CNE14_1_q0.3_peak_63382	chr4	63302414	63444821	+	2491	NA	Intergenic	Intergenic	-110954	ENSDART00000169518.2	ENSDARG00000100090	LOC100006562	ENSDART00000168681			ENSDARG00000100090.2
CNE14_1_q0.3_peak_23780	chr16	25680464	25680931	+	2489	NA	promoter-TSS (ENSDART00000015302.7)	-promoter-TSS (ENSDART00000015302.7)	-27	ENSDART00000140539.2	ENSDARG00000092112	tomm40	ENSDART00000132693			ENSDARG00000092112.3
CNE14_1_q0.3_peak_33138	chr19	15837653	15838034	+	2486	NA	Intergenic	Intergenic	17584	ENSDART00000133059.3	ENSDARG00000035990	cited4a	ENSDART00000133059			ENSDARG00000035990.6
CNE14_1_q0.3_peak_16416	chr14	9713568	9713976	+	2480	NA	promoter-TSS (ENSDART00000166739.2)	-promoter-TSS (ENSDART00000166739.2)	-137	ENSDART00000166739.2	ENSDARG00000098680	si.zfos.2326c3.2	ENSDART00000166739			ENSDARG00000098680.2
CNE14_1_q0.3_peak_47240	chr22	24157564	24157980	+	2476	NA	promoter-TSS (ENSDART00000159165.2)	-promoter-TSS (ENSDART00000159165.2)	-35	ENSDART00000159165.2	ENSDARG00000102061	b3galt2	ENSDART00000159165			ENSDARG00000102061.2
CNE14_1_q0.3_peak_76585	chr8	10658	11282	+	2474	NA	TTS (ENSDART00000118468.3)	-TTS (ENSDART00000118468.3)	754	ENSDART00000118468.3	ENSDARG00000081629	mir7a.3	ENSDART00000118468			ENSDARG00000081629.3
CNE14_1_q0.3_peak_6135	chr10	43028663	43029268	+	2472	NA	promoter-TSS (ENSDART00000158548.2)	-promoter-TSS (ENSDART00000158548.2)	36	ENSDART00000171494.2	ENSDARG00000099727	ssbp2	ENSDART00000171494			ENSDARG00000099727.2
CNE14_1_q0.3_peak_11349	chr12	38807370	38807683	+	2470	NA	promoter-TSS (ENSDART00000155563.2)	-promoter-TSS (ENSDART00000155563.2)	-78	ENSDART00000155563.2	ENSDARG00000074041	abca5	ENSDART00000155563			ENSDARG00000074041.7
CNE14_1_q0.3_peak_30641	chr18	31466350	31839044	+	2467	NA	intron (ENSDART00000165660.2, intron 5 of 24)	-intron (ENSDART00000165660.2, intron 5 of 24)	41953	ENSDART00000165660.2	ENSDARG00000101059	dhx36	ENSDART00000165660			ENSDARG00000101059.2
CNE14_1_q0.3_peak_78572	chr8	34052448	34053196	+	2463	NA	promoter-TSS (ENSDART00000040126.10)	-promoter-TSS (ENSDART00000040126.10)	-803	ENSDART00000159208.2	ENSDARG00000013615	pbx3b	ENSDART00000098822			ENSDARG00000013615.14
CNE14_1_q0.3_peak_58461	chr3	15395023	15395458	+	2459	NA	intron (ENSDART00000133168.3, intron 2 of 23)	-intron (ENSDART00000133168.3, intron 2 of 23)	812	ENSDART00000133168.3	ENSDARG00000011597	atxn2l	ENSDART00000133168			ENSDARG00000011597.10
CNE14_1_q0.3_peak_78585	chr8	34772153	35040162	+	2459	NA	Intergenic	Intergenic	-16824	ENSDART00000188445.1	ENSDARG00000116500	LOC100536005	ENSDART00000182965			ENSDARG00000116500.1
CNE14_1_q0.3_peak_57773	chr3	5964197	5964593	+	2458	NA	exon (ENSDART00000184738.1, exon 1 of 6)	-exon (ENSDART00000184738.1, exon 1 of 6)	162	ENSDART00000184738.1	ENSDARG00000116871	wu.fb95e10	ENSDART00000184738			ENSDARG00000116871.1
CNE14_1_q0.3_peak_53285	chr24	24922891	24923228	+	2457	NA	promoter-TSS (ENSDART00000065288.7)	-promoter-TSS (ENSDART00000065288.7)	-107	ENSDART00000065288.7	ENSDARG00000058162	pcyt1ba	ENSDART00000065288			ENSDARG00000058162.7
CNE14_1_q0.3_peak_3057	chr1	56435182	56435684	+	2448	NA	promoter-TSS (ENSDART00000037576.8)	-promoter-TSS (ENSDART00000037576.8)	-251	ENSDART00000037576.8	ENSDARG00000025074	slc25a10	ENSDART00000037576			ENSDARG00000025074.8
CNE14_1_q0.3_peak_63085	chr4	58161239	58161602	+	2444	NA	Intergenic	Intergenic	-20990	ENSDART00000194376.1	ENSDARG00000117604	LOC103910797	ENSDART00000194376			ENSDARG00000117604.1
CNE14_1_q0.3_peak_2630	chr1	50710300	50710926	+	2443	NA	promoter-TSS (ENSDART00000080389.5)	-promoter-TSS (ENSDART00000080389.5)	-145	ENSDART00000080389.5	ENSDARG00000075564	#N/A	ENSDART00000080389			ENSDARG00000075564.5
CNE14_1_q0.3_peak_69621	chr6	14040116	14040441	+	2438	NA	promoter-TSS (ENSDART00000065361.5)	-promoter-TSS (ENSDART00000065361.5)	-117	ENSDART00000179765.1	ENSDARG00000044511	etv5b	ENSDART00000184606			ENSDARG00000044511.7
CNE14_1_q0.3_peak_76903	chr8	1999275	1999610	+	2430	NA	Intergenic	Intergenic	19619	ENSDART00000184535.1	ENSDARG00000113594	#N/A	ENSDART00000184535			ENSDARG00000113594.1
CNE14_1_q0.3_peak_63010	chr4	55814045	55825398	+	2430	NA	intron (ENSDART00000185611.1, intron 3 of 3)	-intron (ENSDART00000185611.1, intron 3 of 3)	-7365	ENSDART00000179700.1	ENSDARG00000114924	#N/A	ENSDART00000179700			ENSDARG00000114924.1
CNE14_1_q0.3_peak_42649	chr20	54334113	54334466	+	2421	NA	exon (ENSDART00000144633.4, exon 1 of 4)	-exon (ENSDART00000144633.4, exon 1 of 4)	515	ENSDART00000144633.4	ENSDARG00000078095	cipcb	ENSDART00000113792			ENSDARG00000078095.6
CNE14_1_q0.3_peak_77733	chr8	11687001	11687336	+	2419	NA	promoter-TSS (ENSDART00000042040.8)	-promoter-TSS (ENSDART00000042040.8)	-86	ENSDART00000042040.8	ENSDARG00000029439	atp2a2a	ENSDART00000146241			ENSDARG00000029439.8
CNE14_1_q0.3_peak_9742	chr12	1468785	1469534	+	2418	NA	promoter-TSS (ENSDART00000059143.6)	-promoter-TSS (ENSDART00000059143.6)	69	ENSDART00000183637.1	ENSDARG00000040407	usp22	ENSDART00000152411			ENSDARG00000040407.7
CNE14_1_q0.3_peak_33503	chr19	24487994	24488472	+	2416	NA	promoter-TSS (ENSDART00000052421.4)	-promoter-TSS (ENSDART00000052421.4)	-170	ENSDART00000052421.4	ENSDARG00000036107	txnipa	ENSDART00000052421			ENSDARG00000036107.4
CNE14_1_q0.3_peak_8672	chr11	36279291	36279698	+	2407	NA	intron (ENSDART00000103064.5, intron 1 of 7)	-intron (ENSDART00000103064.5, intron 1 of 7)	108	ENSDART00000122531.3	ENSDARG00000042004	nfya	ENSDART00000103064			ENSDARG00000042004.8
CNE14_1_q0.3_peak_62923	chr4	51841530	51843031	+	2406	NA	Intergenic	Intergenic	-34005	ENSDART00000162676.2	ENSDARG00000100640	#N/A	ENSDART00000162676			ENSDARG00000100640.2
CNE14_1_q0.3_peak_14400	chr13	39947319	39947772	+	2372	NA	promoter-TSS (ENSDART00000056996.5)	-promoter-TSS (ENSDART00000056996.5)	-210	ENSDART00000056996.5	ENSDARG00000039041	sfrp5	ENSDART00000056996			ENSDARG00000039041.7
CNE14_1_q0.3_peak_23432	chr16	16848831	16849347	+	2354	NA	promoter-TSS (ENSDART00000047409.8)	-promoter-TSS (ENSDART00000047409.8)	-131	ENSDART00000047409.8	ENSDARG00000073732	myh14	ENSDART00000138267			ENSDARG00000073732.6
CNE14_1_q0.3_peak_10528	chr12	15566415	15567396	+	2349	NA	exon (ENSDART00000053003.5, exon 1 of 2)	-exon (ENSDART00000053003.5, exon 1 of 2)	199	ENSDART00000053003.5	ENSDARG00000036482	hexim1	ENSDART00000053003			ENSDARG00000036482.6
CNE14_1_q0.3_peak_1929	chr1	33647259	33647936	+	2343	NA	promoter-TSS (ENSDART00000015547.9)	-promoter-TSS (ENSDART00000015547.9)	-85	ENSDART00000114384.4	ENSDARG00000079350	znf654	ENSDART00000114384			ENSDARG00000079350.5
CNE14_1_q0.3_peak_84140	chrKN149955.1	4039	4487	+	2339	NA	NA	NA	NA	NA
CNE14_1_q0.3_peak_49964	chr23	12615442	12660811	+	2334	NA	Intergenic	Intergenic	92944	ENSDART00000166990.2	ENSDARG00000071271	si.zfos.452g4.1	ENSDART00000105283			ENSDARG00000071271.5
CNE14_1_q0.3_peak_19850	chr15	8335465	8335833	+	2329	NA	promoter-TSS (ENSDART00000152603.2)	-promoter-TSS (ENSDART00000152603.2)	49	ENSDART00000152603.2	ENSDARG00000062562	egln2	ENSDART00000190066			ENSDARG00000062562.7
CNE14_1_q0.3_peak_5211	chr10	22723767	22724117	+	2324	NA	promoter-TSS (ENSDART00000136123.4)	-promoter-TSS (ENSDART00000136123.4)	-117	ENSDART00000136123.4	ENSDARG00000056929	kdm6bb	ENSDART00000136123			ENSDARG00000056929.7
CNE14_1_q0.3_peak_10026	chr12	3777758	3778211	+	2321	NA	intron (ENSDART00000152128.3, intron 1 of 6)	-intron (ENSDART00000152128.3, intron 1 of 6)	864	ENSDART00000152128.3	ENSDARG00000063555	si.ch211.166g5.4	ENSDART00000152128			ENSDARG00000063555.7
CNE14_1_q0.3_peak_60970	chr4	20656	21208	+	2317	NA	Intergenic	Intergenic	-2721	ENSDART00000171737.2	ENSDARG00000102141	ptpn12	ENSDART00000171737			ENSDARG00000102141.2
CNE14_1_q0.3_peak_1407	chr1	25370105	25370481	+	2316	NA	promoter-TSS (ENSDART00000050445.7)	-promoter-TSS (ENSDART00000050445.7)	-12	ENSDART00000050445.7	ENSDARG00000031817	trim2a	ENSDART00000050445			ENSDARG00000031817.8
CNE14_1_q0.3_peak_5673	chr10	37500015	37500788	+	2315	NA	promoter-TSS (ENSDART00000134104.3)	-promoter-TSS (ENSDART00000134104.3)	-74	ENSDART00000134104.3	ENSDARG00000033901	msi2a	ENSDART00000135642			ENSDARG00000033901.7
CNE14_1_q0.3_peak_78177	chr8	25034201	25034588	+	2315	NA	promoter-TSS (ENSDART00000003493.10)	-promoter-TSS (ENSDART00000003493.10)	17	ENSDART00000135973.3	ENSDARG00000001621	nfyal	ENSDART00000003493			ENSDARG00000001621.12
CNE14_1_q0.3_peak_77622	chr8	8801588	8802005	+	2314	NA	Intergenic	Intergenic	-44136	ENSDART00000112028.4	ENSDARG00000077112	si.ch211.180f4.1	ENSDART00000112028			ENSDARG00000077112.4
CNE14_1_q0.3_peak_42603	chr20	53949581	53950011	+	2313	NA	promoter-TSS (ENSDART00000153435.2)	-promoter-TSS (ENSDART00000153435.2)	2	ENSDART00000153435.2	ENSDARG00000031200	ppp2r5cb	ENSDART00000153435			ENSDARG00000031200.11
CNE14_1_q0.3_peak_84070	chrKN149795.1	24172	24652	+	2299	NA	NA	NA	NA	NA
CNE14_1_q0.3_peak_53730	chr24	35609199	35609832	+	2298	NA	Intergenic	Intergenic	44847	ENSDART00000122734.3	ENSDARG00000087303	cebpd	ENSDART00000122734			ENSDARG00000087303.3
CNE14_1_q0.3_peak_69520	chr6	11362709	11365617	+	2297	NA	Intergenic	Intergenic	-1292	ENSDART00000151125.2	ENSDARG00000033012	pcnt	ENSDART00000151125			ENSDARG00000033012.9
CNE14_1_q0.3_peak_40956	chr20	28266589	28267182	+	2293	NA	promoter-TSS (ENSDART00000103330.5)	-promoter-TSS (ENSDART00000103330.5)	-7	ENSDART00000103330.5	ENSDARG00000070426	chac1	ENSDART00000153319			ENSDARG00000070426.6
CNE14_1_q0.3_peak_66286	chr5	32730611	32731059	+	2280	NA	intron (ENSDART00000194970.1, intron 2 of 2)	-intron (ENSDART00000194970.1, intron 2 of 2)	6256	ENSDART00000194970.1	ENSDARG00000117769	#N/A	ENSDART00000194970			ENSDARG00000117769.1
CNE14_1_q0.3_peak_5024	chr10	16838456	16839778	+	2279	NA	Intergenic	Intergenic	29094	ENSDART00000171755.2	ENSDARG00000103135	stoml2	ENSDART00000171755			ENSDARG00000103135.2
CNE14_1_q0.3_peak_12132	chr12	48841207	48841832	+	2278	NA	promoter-TSS (ENSDART00000125331.3)	-promoter-TSS (ENSDART00000125331.3)	100	ENSDART00000125331.3	ENSDARG00000090949	dlg5b.1	ENSDART00000125331			ENSDARG00000090949.4
CNE14_1_q0.3_peak_33296	chr19	19504551	19505062	+	2275	NA	exon (ENSDART00000160582.2, exon 1 of 11)	-exon (ENSDART00000160582.2, exon 1 of 11)	361	ENSDART00000160582.2	ENSDARG00000099002	creb5a	ENSDART00000160582			ENSDARG00000099002.2
CNE14_1_q0.3_peak_66679	chr5	42307662	42809473	+	2270	NA	Intergenic	Intergenic	-14045	ENSDART00000157968.2	ENSDARG00000103715	#N/A	ENSDART00000157968			ENSDARG00000103715.2
CNE14_1_q0.3_peak_82982	chr9	49658757	49659362	+	2269	NA	promoter-TSS (ENSDART00000189643.1)	-promoter-TSS (ENSDART00000189643.1)	-55	ENSDART00000189643.1	ENSDARG00000079741	csrnp3	ENSDART00000192969			ENSDARG00000079741.4
CNE14_1_q0.3_peak_38869	chr20	328755	329182	+	2269	NA	promoter-TSS (ENSDART00000036635.8)	-promoter-TSS (ENSDART00000036635.8)	-64	ENSDART00000036635.8	ENSDARG00000025319	fynb	ENSDART00000169407			ENSDARG00000025319.9
CNE14_1_q0.3_peak_5166	chr10	21444350	21445093	+	2267	NA	promoter-TSS (ENSDART00000019252.8)	-promoter-TSS (ENSDART00000019252.8)	56	ENSDART00000147215.2	ENSDARG00000017230	fbxw11b	ENSDART00000184386			ENSDARG00000017230.9
CNE14_1_q0.3_peak_80185	chr8	54200960	54201278	+	2259	NA	exon (ENSDART00000175913.2, exon 14 of 14)	-exon (ENSDART00000175913.2, exon 14 of 14)	-1435	ENSDART00000020569.9	ENSDARG00000006990	creld1	ENSDART00000020569			ENSDARG00000006990.9
CNE14_1_q0.3_peak_66675	chr5	42245300	42245625	+	2252	NA	Intergenic	Intergenic	7851	ENSDART00000138811.2	ENSDARG00000095587	#N/A	ENSDART00000138811			ENSDARG00000095587.2
CNE14_1_q0.3_peak_39623	chr20	4793248	4793763	+	2250	NA	promoter-TSS (ENSDART00000053870.6)	-promoter-TSS (ENSDART00000053870.6)	-11	ENSDART00000053875.5	ENSDARG00000037066	lgals8a	ENSDART00000053875			ENSDARG00000037066.7
CNE14_1_q0.3_peak_24640	chr16	46765947	46766413	+	2249	NA	promoter-TSS (ENSDART00000115244.4)	-promoter-TSS (ENSDART00000115244.4)	-27	ENSDART00000115244.4	ENSDARG00000076638	mex3a	ENSDART00000115244			ENSDARG00000076638.4
CNE14_1_q0.3_peak_56118	chr25	26673231	26673631	+	2245	NA	exon (ENSDART00000154917.2, exon 1 of 3)	-exon (ENSDART00000154917.2, exon 1 of 3)	139	ENSDART00000154917.2	ENSDARG00000088171	#N/A	ENSDART00000154917			ENSDARG00000088171.4
CNE14_1_q0.3_peak_82944	chr9	48943420	48943940	+	2231	NA	exon (ENSDART00000125090.3, exon 1 of 17)	-exon (ENSDART00000125090.3, exon 1 of 17)	209	ENSDART00000125090.3	ENSDARG00000087203	stk39	ENSDART00000125090			ENSDARG00000087203.3
CNE14_1_q0.3_peak_23277	chr16	14009854	14010235	+	2225	NA	promoter-TSS (ENSDART00000059928.5)	-promoter-TSS (ENSDART00000059928.5)	18	ENSDART00000122272.4	ENSDARG00000040890	fdps	ENSDART00000122272			ENSDARG00000040890.8
CNE14_1_q0.3_peak_62065	chr4	29164379	29164766	+	2223	NA	Intergenic	Intergenic	-1268	ENSDART00000169539.2	ENSDARG00000104041	#N/A	ENSDART00000169539			ENSDARG00000104041.3
CNE14_1_q0.3_peak_58248	chr3	11827586	11828403	+	2217	NA	exon (ENSDART00000018159.9, exon 1 of 9)	-exon (ENSDART00000018159.9, exon 1 of 9)	212	ENSDART00000018159.9	ENSDARG00000011609	si.ch211.262e15.1	ENSDART00000018159			ENSDARG00000011609.10
CNE14_1_q0.3_peak_10346	chr12	11593421	11593838	+	2216	NA	promoter-TSS (ENSDART00000138954.3)	-promoter-TSS (ENSDART00000138954.3)	-193	ENSDART00000138954.3	ENSDARG00000094504	plekha1b	ENSDART00000138954			ENSDARG00000094504.5
CNE14_1_q0.3_peak_61168	chr4	2545310	2545771	+	2214	NA	promoter-TSS (ENSDART00000140760.3)	-promoter-TSS (ENSDART00000140760.3)	-195	ENSDART00000140760.3	ENSDARG00000008986	e2f7	ENSDART00000140760			ENSDARG00000008986.10
CNE14_1_q0.3_peak_2422	chr1	44704002	44704550	+	2208	NA	promoter-TSS (ENSDART00000133210.3)	-promoter-TSS (ENSDART00000133210.3)	-15	ENSDART00000133210.3	ENSDARG00000002840	si.dkey.28b4.8	ENSDART00000193926			ENSDARG00000002840.12
CNE14_1_q0.3_peak_19636	chr15	5799054	5799411	+	2208	NA	promoter-TSS (ENSDART00000142334.3)	-promoter-TSS (ENSDART00000142334.3)	-49	ENSDART00000171528.2	ENSDARG00000059303	hnrnpl2	ENSDART00000146815			ENSDARG00000059303.7
CNE14_1_q0.3_peak_40875	chr20	26307317	26307904	+	2207	NA	intron (ENSDART00000139350.4, intron 88 of 143)	-intron (ENSDART00000139350.4, intron 88 of 143)	-41392	ENSDART00000152842.2	ENSDARG00000009499	syne1a	ENSDART00000152842			ENSDARG00000009499.13
CNE14_1_q0.3_peak_7623	chr11	13176315	13176717	+	2207	NA	promoter-TSS (ENSDART00000123257.3)	-promoter-TSS (ENSDART00000123257.3)	-52	ENSDART00000125371.3	ENSDARG00000018411	mknk1	ENSDART00000125371			ENSDARG00000018411.10
CNE14_1_q0.3_peak_23140	chr16	11185506	11185980	+	2205	NA	intron (ENSDART00000140674.3, intron 2 of 20)	-intron (ENSDART00000140674.3, intron 2 of 20)	-3067	ENSDART00000186011.1	ENSDARG00000055502	cicb	ENSDART00000140674			ENSDARG00000055502.8
CNE14_1_q0.3_peak_5989	chr10	41668349	41668937	+	2200	NA	exon (ENSDART00000127073.3, exon 1 of 4)	-exon (ENSDART00000127073.3, exon 1 of 4)	160	ENSDART00000127073.3	ENSDARG00000091128	lrrc75bb	ENSDART00000127073			ENSDARG00000091128.3
CNE14_1_q0.3_peak_2812	chr1	53684974	53685455	+	2199	NA	promoter-TSS (ENSDART00000162751.2)	-promoter-TSS (ENSDART00000162751.2)	-124	ENSDART00000162751.2	ENSDARG00000078041	xpo1a	ENSDART00000162751			ENSDARG00000078041.4
CNE14_1_q0.3_peak_2983	chr1	55872788	55873289	+	2198	NA	exon (ENSDART00000019936.6, exon 1 of 10)	-exon (ENSDART00000019936.6, exon 1 of 10)	140	ENSDART00000019936.6	ENSDARG00000016809	prkacab	ENSDART00000019936			ENSDARG00000016809.6
CNE14_1_q0.3_peak_56018	chr25	25123110	25123456	+	2194	NA	promoter-TSS (ENSDART00000163892.2)	-promoter-TSS (ENSDART00000163892.2)	-102	ENSDART00000163892.2	ENSDARG00000101251	ldha	ENSDART00000167542			ENSDARG00000101251.2
CNE14_1_q0.3_peak_19496	chr15	4528324	4528650	+	2194	NA	promoter-TSS (ENSDART00000128602.3)	-promoter-TSS (ENSDART00000128602.3)	-100	ENSDART00000128602.3	ENSDARG00000042835	tfdp2	ENSDART00000155945			ENSDARG00000042835.9
CNE14_1_q0.3_peak_38200	chr2	55797163	55797579	+	2189	NA	promoter-TSS (ENSDART00000158147.3)	-promoter-TSS (ENSDART00000158147.3)	-53	ENSDART00000158147.3	ENSDARG00000102808	calr3b	ENSDART00000158147			ENSDARG00000102808.3
CNE14_1_q0.3_peak_64252	chr5	872125	872928	+	2185	NA	intron (ENSDART00000130042.3, intron 1 of 20)	-intron (ENSDART00000130042.3, intron 1 of 20)	227	ENSDART00000130042.3	ENSDARG00000086896	fubp3	ENSDART00000130042			ENSDARG00000086896.3
CNE14_1_q0.3_peak_23462	chr16	17763591	17764404	+	2170	NA	exon (ENSDART00000148878.2, exon 1 of 7)	-exon (ENSDART00000148878.2, exon 1 of 7)	102	ENSDART00000148878.2	ENSDARG00000061621	them4	ENSDART00000149408			ENSDARG00000061621.7
CNE14_1_q0.3_peak_5013	chr10	16797843	16799056	+	2166	NA	Intergenic	Intergenic	41903	ENSDART00000168624.2	ENSDARG00000105041	#N/A	ENSDART00000168624			ENSDARG00000105041.2
CNE14_1_q0.3_peak_78922	chr8	42712329	42712881	+	2160	NA	promoter-TSS (ENSDART00000132229.4)	-promoter-TSS (ENSDART00000132229.4)	-32	ENSDART00000137258.2	ENSDARG00000075349	si.ch73.138n13.1	ENSDART00000137258			ENSDARG00000075349.6
CNE14_1_q0.3_peak_27024	chr17	18031471	18032029	+	2156	NA	promoter-TSS (ENSDART00000022758.7)	-promoter-TSS (ENSDART00000022758.7)	-149	ENSDART00000022758.7	ENSDARG00000016513	setd3	ENSDART00000022758			ENSDARG00000016513.10
CNE14_1_q0.3_peak_61406	chr4	9836175	9836533	+	2156	NA	promoter-TSS (ENSDART00000004879.6)	-promoter-TSS (ENSDART00000004879.6)	-12	ENSDART00000150519.3	ENSDARG00000086650	ttc41	ENSDART00000150519			ENSDARG00000086650.5
CNE14_1_q0.3_peak_63408	chr4	66586374	66801147	+	2156	NA	Intergenic	Intergenic	21735	ENSDART00000192149.1	ENSDARG00000109951	#N/A	ENSDART00000192149			ENSDARG00000109951.1
CNE14_1_q0.3_peak_31153	chr18	40684667	40685103	+	2154	NA	promoter-TSS (ENSDART00000113799.3)	-promoter-TSS (ENSDART00000113799.3)	-93	ENSDART00000139042.2	ENSDARG00000068374	si.ch211.132b12.7	ENSDART00000139042			ENSDARG00000068374.6
CNE14_1_q0.3_peak_63566	chr4	69113716	70288121	+	2153	NA	Intergenic	Intergenic	-11305	ENSDART00000163035.2	ENSDARG00000104341	#N/A	ENSDART00000172120			ENSDARG00000104341.2
CNE14_1_q0.3_peak_78806	chr8	39884339	39884656	+	2149	NA	promoter-TSS (ENSDART00000131372.2)	-promoter-TSS (ENSDART00000131372.2)	-138	ENSDART00000131372.2	ENSDARG00000059630	mlec	ENSDART00000131372			ENSDARG00000059630.7
CNE14_1_q0.3_peak_21071	chr15	37589579	37589987	+	2149	NA	promoter-TSS (ENSDART00000076066.7)	-promoter-TSS (ENSDART00000076066.7)	3	ENSDART00000156298.3	ENSDARG00000053950	lin37	ENSDART00000076066			ENSDARG00000053950.7
CNE14_1_q0.3_peak_20084	chr15	14551918	14552349	+	2149	NA	promoter-TSS (ENSDART00000171169.2)	-promoter-TSS (ENSDART00000171169.2)	-32	ENSDART00000171169.2	ENSDARG00000101949	numbl	ENSDART00000179368			ENSDARG00000101949.3
CNE14_1_q0.3_peak_75596	chr7	64971065	64971587	+	2147	NA	exon (ENSDART00000164682.3, exon 1 of 6)	-exon (ENSDART00000164682.3, exon 1 of 6)	513	ENSDART00000164682.3	ENSDARG00000078118	sinhcafl	ENSDART00000164682			ENSDARG00000078118.5
CNE14_1_q0.3_peak_61214	chr4	4079158	4079613	+	2147	NA	promoter-TSS (ENSDART00000028016.8)	-promoter-TSS (ENSDART00000028016.8)	-33	ENSDART00000028016.8	ENSDARG00000006283	waslb	ENSDART00000028016			ENSDARG00000006283.8
CNE14_1_q0.3_peak_46070	chr22	1513371	2082036	+	2146	NA	intron (ENSDART00000170834.2, intron 2 of 2)	-intron (ENSDART00000170834.2, intron 2 of 2)	1646	ENSDART00000170834.2	ENSDARG00000104613	#N/A	ENSDART00000170834			ENSDARG00000104613.3
CNE14_1_q0.3_peak_69211	chr6	4872683	4873033	+	2144	NA	promoter-TSS (ENSDART00000092290.6)	-promoter-TSS (ENSDART00000092290.6)	-25	ENSDART00000186730.1	ENSDARG00000063264	pcdh9	ENSDART00000092290			ENSDARG00000063264.8
CNE14_1_q0.3_peak_79142	chr8	47218968	47219296	+	2142	NA	promoter-TSS (ENSDART00000075068.6)	-promoter-TSS (ENSDART00000075068.6)	11	ENSDART00000075068.6	ENSDARG00000053087	mthfr	ENSDART00000075068			ENSDARG00000053087.7
CNE14_1_q0.3_peak_62608	chr4	42940059	42940389	+	2139	NA	Intergenic	Intergenic	61668	ENSDART00000171047.2	ENSDARG00000098279	#N/A	ENSDART00000171047			ENSDARG00000098279.2
CNE14_1_q0.3_peak_47961	chr22	34660728	34661282	+	2134	NA	promoter-TSS (ENSDART00000121556.3)	-promoter-TSS (ENSDART00000121556.3)	-396	ENSDART00000155985.2	ENSDARG00000087407	si.ch73.304f21.1	ENSDART00000155985			ENSDARG00000087407.4
CNE14_1_q0.3_peak_81215	chr9	9671118	9671722	+	2127	NA	promoter-TSS (ENSDART00000018228.9)	-promoter-TSS (ENSDART00000018228.9)	-176	ENSDART00000018228.9	ENSDARG00000017803	gsk3ba	ENSDART00000018228			ENSDARG00000017803.9
CNE14_1_q0.3_peak_60685	chr3	60081572	60082119	+	2125	NA	intron (ENSDART00000166982.2, intron 7 of 11)	-intron (ENSDART00000166982.2, intron 7 of 11)	34813	ENSDART00000102030.4	ENSDARG00000103341	#N/A	ENSDART00000102030			ENSDARG00000103341.2
CNE14_1_q0.3_peak_47186	chr22	22861353	22861717	+	2124	NA	Intergenic	Intergenic	20977	ENSDART00000120849.2	ENSDARG00000085449	#N/A	ENSDART00000120849			ENSDARG00000085449.2
CNE14_1_q0.3_peak_63202	chr4	61119069	61467141	+	2122	NA	Intergenic	Intergenic	88968	ENSDART00000183140.1	ENSDARG00000111851	#N/A	ENSDART00000183140			ENSDARG00000111851.1
CNE14_1_q0.3_peak_55314	chr25	6389753	6390400	+	2122	NA	promoter-TSS (ENSDART00000083539.6)	-promoter-TSS (ENSDART00000083539.6)	-363	ENSDART00000083539.6	ENSDARG00000079716	sin3aa	ENSDART00000138782			ENSDARG00000079716.5
CNE14_1_q0.3_peak_54167	chr24	39186588	39187032	+	2119	NA	promoter-TSS (ENSDART00000123019.3)	-promoter-TSS (ENSDART00000123019.3)	-130	ENSDART00000155817.3	ENSDARG00000077487	spsb3b	ENSDART00000155817			ENSDARG00000077487.5
CNE14_1_q0.3_peak_64411	chr5	1963409	1963808	+	2114	NA	promoter-TSS (ENSDART00000073462.5)	-promoter-TSS (ENSDART00000073462.5)	-110	ENSDART00000073462.5	ENSDARG00000051783	rplp0	ENSDART00000150163			ENSDARG00000051783.5
CNE14_1_q0.3_peak_62009	chr4	28565813	28582333	+	2107	NA	Intergenic	Intergenic	-31938	ENSDART00000178343.2	ENSDARG00000106572	#N/A	ENSDART00000178343			ENSDARG00000106572.2
CNE14_1_q0.3_peak_76986	chr8	2615929	2616436	+	2098	NA	promoter-TSS (ENSDART00000140033.2)	-promoter-TSS (ENSDART00000140033.2)	144	ENSDART00000027214.7	ENSDARG00000010572	slc25a25a	ENSDART00000140033			ENSDARG00000010572.7
CNE14_1_q0.3_peak_13470	chr13	13944641	13945207	+	2096	NA	promoter-TSS (ENSDART00000089501.5)	-promoter-TSS (ENSDART00000089501.5)	-294	ENSDART00000089501.5	ENSDARG00000062139	eif2ak3	ENSDART00000089501			ENSDARG00000062139.7
CNE14_1_q0.3_peak_33887	chr19	35428714	35429115	+	2094	NA	promoter-TSS (ENSDART00000003167.5)	-promoter-TSS (ENSDART00000003167.5)	0	ENSDART00000003167.5	ENSDARG00000005926	ak2	ENSDART00000003167			ENSDARG00000005926.6
CNE14_1_q0.3_peak_60324	chr3	57629922	57631048	+	2092	NA	intron (ENSDART00000129598.3, intron 1 of 20)	-intron (ENSDART00000129598.3, intron 1 of 20)	306	ENSDART00000129598.3	ENSDARG00000032327	usp36	ENSDART00000129598			ENSDARG00000032327.10
CNE14_1_q0.3_peak_76761	chr8	1266179	1267300	+	2091	NA	promoter-TSS (ENSDART00000148441.3)	-promoter-TSS (ENSDART00000148441.3)	444	ENSDART00000150073.2	ENSDARG00000021483	cdc14b	ENSDART00000149257			ENSDARG00000021483.12
CNE14_1_q0.3_peak_83966	chrKN149693.1	19834	24769	+	2091	NA	NA	NA	NA	NA
CNE14_1_q0.3_peak_11150	chr12	34468606	34468971	+	2091	NA	Intergenic	Intergenic	-9187	ENSDART00000111717.4	ENSDARG00000074396	fscn2b	ENSDART00000111717			ENSDARG00000074396.5
CNE14_1_q0.3_peak_38338	chr2	56655443	56655889	+	2089	NA	intron (ENSDART00000113589.4, intron 1 of 6)	-intron (ENSDART00000113589.4, intron 1 of 6)	103	ENSDART00000113589.4	ENSDARG00000076836	gpx4b	ENSDART00000191786			ENSDARG00000076836.4
CNE14_1_q0.3_peak_60789	chr3	60710967	60711455	+	2088	NA	promoter-TSS (ENSDART00000184119.1)	-promoter-TSS (ENSDART00000184119.1)	-84	ENSDART00000184119.1	ENSDARG00000115335	ubald2	ENSDART00000184119			ENSDARG00000115335.1
CNE14_1_q0.3_peak_53287	chr24	25004378	25004876	+	2073	NA	promoter-TSS (ENSDART00000080997.6)	-promoter-TSS (ENSDART00000080997.6)	-16	ENSDART00000136860.2	ENSDARG00000058178	zdhhc20b	ENSDART00000080997			ENSDARG00000058178.7
CNE14_1_q0.3_peak_45465	chr21	43527231	43527678	+	2073	NA	promoter-TSS (ENSDART00000126092.3)	-promoter-TSS (ENSDART00000126092.3)	-256	ENSDART00000126092.3	ENSDARG00000086551	irs4a	ENSDART00000126092			ENSDARG00000086551.3
CNE14_1_q0.3_peak_46205	chr22	3298953	3299312	+	2072	NA	promoter-TSS (ENSDART00000160305.2)	-promoter-TSS (ENSDART00000160305.2)	-32	ENSDART00000160305.2	ENSDARG00000103522	si.zfos.943e10.1	ENSDART00000190993			ENSDARG00000103522.2
CNE14_1_q0.3_peak_45221	chr21	41369292	41369670	+	2070	NA	promoter-TSS (ENSDART00000159290.2)	-promoter-TSS (ENSDART00000159290.2)	58	ENSDART00000187546.1	ENSDARG00000100499	cpeb4b	ENSDART00000159290			ENSDARG00000100499.2
CNE14_1_q0.3_peak_77089	chr8	3648916	3649424	+	2069	NA	exon (ENSDART00000033152.7, exon 1 of 6)	-exon (ENSDART00000033152.7, exon 1 of 6)	134	ENSDART00000033152.7	ENSDARG00000058425	rab35b	ENSDART00000033152			ENSDARG00000058425.4
CNE14_1_q0.3_peak_49962	chr23	12361625	12362213	+	2068	NA	promoter-TSS (ENSDART00000143728.3)	-promoter-TSS (ENSDART00000143728.3)	20	ENSDART00000143728.3	ENSDARG00000075842	pigt	ENSDART00000143728			ENSDARG00000075842.6
CNE14_1_q0.3_peak_78833	chr8	40628710	40629722	+	2068	NA	exon (ENSDART00000163598.3, exon 1 of 4)	-exon (ENSDART00000163598.3, exon 1 of 4)	290	ENSDART00000163598.3	ENSDARG00000098108	dusp2	ENSDART00000163598			ENSDARG00000098108.3
CNE14_1_q0.3_peak_29521	chr18	5111231	5111887	+	2067	NA	promoter-TSS (ENSDART00000046902.7)	-promoter-TSS (ENSDART00000046902.7)	-110	ENSDART00000046902.7	ENSDARG00000035054	pdcd10a	ENSDART00000188091			ENSDARG00000035054.8
CNE14_1_q0.3_peak_20101	chr15	14765964	14767336	+	2067	NA	Intergenic	Intergenic	-11332	ENSDART00000160302.2	ENSDARG00000103692	p4ha3	ENSDART00000160302			ENSDARG00000103692.2
CNE14_1_q0.3_peak_20010	chr15	11768026	11768387	+	2064	NA	Intergenic	Intergenic	-46763	ENSDART00000127248.3	ENSDARG00000087018	#N/A	ENSDART00000127248			ENSDARG00000087018.3
CNE14_1_q0.3_peak_67230	chr5	54394931	54395648	+	2060	NA	exon (ENSDART00000160781.2, exon 1 of 6)	-exon (ENSDART00000160781.2, exon 1 of 6)	199	ENSDART00000160781.2	ENSDARG00000100773	zmynd19	ENSDART00000161692			ENSDARG00000100773.2
CNE14_1_q0.3_peak_53216	chr24	23202325	23202699	+	2060	NA	promoter-TSS (ENSDART00000143862.2)	-promoter-TSS (ENSDART00000143862.2)	-33	ENSDART00000143862.2	ENSDARG00000062421	pex2	ENSDART00000143862			ENSDARG00000062421.7
CNE14_1_q0.3_peak_69811	chr6	18359134	18359527	+	2059	NA	promoter-TSS (ENSDART00000157796.2)	-promoter-TSS (ENSDART00000157796.2)	24	ENSDART00000157796.2	ENSDARG00000098771	cbx8b	ENSDART00000157796			ENSDARG00000098771.3
CNE14_1_q0.3_peak_36115	chr2	14426474	14426988	+	2058	NA	promoter-TSS (ENSDART00000162816.2)	-promoter-TSS (ENSDART00000162816.2)	-154	ENSDART00000162816.2	ENSDARG00000099630	#N/A	ENSDART00000162816			ENSDARG00000099630.2
CNE14_1_q0.3_peak_31562	chr18	46829750	46830280	+	2055	NA	Intergenic	Intergenic	31856	ENSDART00000059001.6	ENSDARG00000040319	c5ar1	ENSDART00000059001			ENSDARG00000040319.6
CNE14_1_q0.3_peak_54235	chr24	39772022	39772392	+	2054	NA	promoter-TSS (ENSDART00000087441.6)	-promoter-TSS (ENSDART00000087441.6)	-162	ENSDART00000087441.6	ENSDARG00000061363	si.ch211.276f18.2	ENSDART00000181867			ENSDARG00000061363.6
CNE14_1_q0.3_peak_22300	chr16	1218459	1218947	+	2054	NA	Intergenic	Intergenic	-1743	ENSDART00000115899.2	ENSDARG00000115296	#N/A	ENSDART00000115899			ENSDARG00000115296.1
CNE14_1_q0.3_peak_5785	chr10	39076659	39077051	+	2053	NA	intron (ENSDART00000184505.1, intron 1 of 8)	-intron (ENSDART00000184505.1, intron 1 of 8)	-7499	ENSDART00000158245.2	ENSDARG00000103919	si.ch73.1a9.3	ENSDART00000158245			ENSDARG00000103919.2
CNE14_1_q0.3_peak_5580	chr10	33594216	33594609	+	2047	NA	TTS (ENSDART00000051198.6)	-TTS (ENSDART00000051198.6)	5697	ENSDART00000051198.6	ENSDARG00000035333	mis18a	ENSDART00000051198			ENSDARG00000035333.6
CNE14_1_q0.3_peak_81294	chr9	11262979	11263581	+	2046	NA	promoter-TSS (ENSDART00000113847.4)	-promoter-TSS (ENSDART00000113847.4)	-52	ENSDART00000113847.4	ENSDARG00000078392	chpfa	ENSDART00000113847			ENSDARG00000078392.4
CNE14_1_q0.3_peak_55025	chr25	3470838	3471211	+	2045	NA	promoter-TSS (ENSDART00000029067.9)	-promoter-TSS (ENSDART00000029067.9)	-114	ENSDART00000029067.9	ENSDARG00000028517	hbp1	ENSDART00000186738			ENSDARG00000028517.9
CNE14_1_q0.3_peak_54757	chr25	1629662	1630130	+	2045	NA	promoter-TSS (ENSDART00000116791.2)	-promoter-TSS (ENSDART00000116791.2)	-147	ENSDART00000116791.2	ENSDARG00000082738	mirlet7i	ENSDART00000116791			ENSDARG00000082738.2
CNE14_1_q0.3_peak_64479	chr5	2721617	2721956	+	2043	NA	promoter-TSS (ENSDART00000169404.3)	-promoter-TSS (ENSDART00000169404.3)	-100	ENSDART00000169404.3	ENSDARG00000103846	hspa5	ENSDART00000169404			ENSDARG00000103846.3
CNE14_1_q0.3_peak_5019	chr10	16820752	16824327	+	2039	NA	Intergenic	Intergenic	45672	ENSDART00000171755.2	ENSDARG00000103135	stoml2	ENSDART00000171755			ENSDARG00000103135.2
CNE14_1_q0.3_peak_46745	chr22	10957832	10958190	+	2038	NA	intron (ENSDART00000105823.6, intron 2 of 20)	-intron (ENSDART00000105823.6, intron 2 of 20)	-40218	ENSDART00000194067.1	ENSDARG00000117807	#N/A	ENSDART00000194067			ENSDARG00000117807.1
CNE14_1_q0.3_peak_83718	chr9	55133968	55134286	+	2036	NA	Intergenic	Intergenic	-5288	ENSDART00000085135.5	ENSDARG00000060438	tbl1x	ENSDART00000085135			ENSDARG00000060438.5
CNE14_1_q0.3_peak_23130	chr16	11029373	11030087	+	2035	NA	promoter-TSS (ENSDART00000091183.7)	-promoter-TSS (ENSDART00000091183.7)	-32	ENSDART00000091183.7	ENSDARG00000062801	erfl3	ENSDART00000091183			ENSDARG00000062801.9
CNE14_1_q0.3_peak_65568	chr5	13767185	13767704	+	2031	NA	promoter-TSS (ENSDART00000134064.2)	-promoter-TSS (ENSDART00000134064.2)	-793	ENSDART00000134064.2	ENSDARG00000032039	mxd1	ENSDART00000134064			ENSDARG00000032039.9
CNE14_1_q0.3_peak_55881	chr25	21324421	21324902	+	2027	NA	promoter-TSS (ENSDART00000151842.3)	-promoter-TSS (ENSDART00000151842.3)	73	ENSDART00000151842.3	ENSDARG00000077569	lrrn3a	ENSDART00000151842			ENSDARG00000077569.6
CNE14_1_q0.3_peak_45863	chr22	396415	396959	+	2026	NA	promoter-TSS (ENSDART00000163198.2)	-promoter-TSS (ENSDART00000163198.2)	-153	ENSDART00000163198.2	ENSDARG00000100252	capzb	ENSDART00000163198			ENSDARG00000100252.3
CNE14_1_q0.3_peak_58359	chr3	12554420	12554781	+	2023	NA	promoter-TSS (ENSDART00000167177.2)	-promoter-TSS (ENSDART00000167177.2)	-201	ENSDART00000167177.2	ENSDARG00000105046	ccnf	ENSDART00000167177			ENSDARG00000105046.2
CNE14_1_q0.3_peak_18224	chr14	46832439	46832820	+	2021	NA	exon (ENSDART00000149571.3, exon 1 of 9)	-exon (ENSDART00000149571.3, exon 1 of 9)	196	ENSDART00000149571.3	ENSDARG00000019579	ldb2a	ENSDART00000149571			ENSDARG00000019579.12
CNE14_1_q0.3_peak_51601	chr23	42876118	42877036	+	2014	NA	promoter-TSS (ENSDART00000086156.7)	-promoter-TSS (ENSDART00000086156.7)	19	ENSDART00000086156.7	ENSDARG00000060849	#N/A	ENSDART00000086156			ENSDARG00000060849.8
CNE14_1_q0.3_peak_69998	chr6	21855034	21855413	+	2011	NA	Intergenic	Intergenic	18043	ENSDART00000151152.3	ENSDARG00000089886	si.dkey.19e4.5	ENSDART00000151658			ENSDARG00000089886.5
CNE14_1_q0.3_peak_13680	chr13	17860262	17860742	+	2006	NA	promoter-TSS (ENSDART00000054579.6)	-promoter-TSS (ENSDART00000054579.6)	-67	ENSDART00000054579.6	ENSDARG00000062489	8-Mar	ENSDART00000054579			ENSDARG00000062489.8
CNE14_1_q0.3_peak_8373	chr11	31179339	31185486	+	2005	NA	Intergenic	Intergenic	-7743	ENSDART00000112098.4	ENSDARG00000075030	stx10	ENSDART00000112098			ENSDARG00000075030.4
CNE14_1_q0.3_peak_57310	chr3	419904	420460	+	2004	NA	promoter-TSS (ENSDART00000137723.2)	-promoter-TSS (ENSDART00000137723.2)	-160	ENSDART00000137723.2	ENSDARG00000095061	LOC101882242	ENSDART00000137723			ENSDARG00000095061.2
CNE14_1_q0.3_peak_63759	chr4	72723406	72723909	+	1998	NA	exon (ENSDART00000158902.3, exon 1 of 12)	-exon (ENSDART00000158902.3, exon 1 of 12)	353	ENSDART00000191925.1	ENSDARG00000101908	rab3ip	ENSDART00000191925			ENSDARG00000101908.3
CNE14_1_q0.3_peak_42240	chr20	51061570	51061962	+	1997	NA	promoter-TSS (ENSDART00000134416.3)	-promoter-TSS (ENSDART00000134416.3)	71	ENSDART00000134416.3	ENSDARG00000092181	mpp5b	ENSDART00000134416			ENSDARG00000092181.3
CNE14_1_q0.3_peak_24757	chr16	48713857	48714263	+	1990	NA	promoter-TSS (ENSDART00000148709.3)	-promoter-TSS (ENSDART00000148709.3)	12	ENSDART00000148709.3	ENSDARG00000046087	brd2b	ENSDART00000148709			ENSDARG00000046087.9
CNE14_1_q0.3_peak_23194	chr16	12267416	12267729	+	1988	NA	promoter-TSS (ENSDART00000060037.4)	-promoter-TSS (ENSDART00000060037.4)	-100	ENSDART00000060037.4	ENSDARG00000040971	zgc.92606	ENSDART00000060037			ENSDARG00000040971.5
CNE14_1_q0.3_peak_55957	chr25	23052304	23052998	+	1982	NA	promoter-TSS (ENSDART00000024633.9)	-promoter-TSS (ENSDART00000024633.9)	56	ENSDART00000024633.9	ENSDARG00000009299	dusp8a	ENSDART00000024633			ENSDARG00000009299.11
CNE14_1_q0.3_peak_17380	chr14	25935100	25935420	+	1982	NA	promoter-TSS (ENSDART00000139855.3)	-promoter-TSS (ENSDART00000139855.3)	-93	ENSDART00000139855.3	ENSDARG00000017741	g3bp1	ENSDART00000145850			ENSDARG00000017741.8
CNE14_1_q0.3_peak_61164	chr4	2380112	2380456	+	1981	NA	promoter-TSS (ENSDART00000177727.2)	-promoter-TSS (ENSDART00000177727.2)	-111	ENSDART00000177727.2	ENSDARG00000101813	nap1l1	ENSDART00000177727			ENSDARG00000101813.3
CNE14_1_q0.3_peak_53330	chr24	26386599	26386952	+	1976	NA	promoter-TSS (ENSDART00000125344.3)	-promoter-TSS (ENSDART00000125344.3)	-148	ENSDART00000125344.3	ENSDARG00000022904	skilb	ENSDART00000125344			ENSDARG00000022904.10
CNE14_1_q0.3_peak_72380	chr6	60104489	60104881	+	1973	NA	promoter-TSS (ENSDART00000057463.6)	-promoter-TSS (ENSDART00000057463.6)	-57	ENSDART00000057463.6	ENSDARG00000039325	pmepa1	ENSDART00000057463			ENSDARG00000039325.7
CNE14_1_q0.3_peak_78147	chr8	23638825	23639184	+	1972	NA	promoter-TSS (ENSDART00000083108.6)	-promoter-TSS (ENSDART00000083108.6)	-120	ENSDART00000083108.6	ENSDARG00000059646	nt5dc2	ENSDART00000146678			ENSDARG00000059646.7
CNE14_1_q0.3_peak_10316	chr12	10409898	10410544	+	1969	NA	promoter-TSS (ENSDART00000052001.7)	-promoter-TSS (ENSDART00000052001.7)	-251	ENSDART00000052001.7	ENSDARG00000035835	eef2k	ENSDART00000149521			ENSDARG00000035835.9
CNE14_1_q0.3_peak_79086	chr8	45837513	45838458	+	1964	NA	intron (ENSDART00000148206.3, intron 1 of 22)	-intron (ENSDART00000046064.6, intron 1 of 2)	292	ENSDART00000046064.6	ENSDARG00000034270	ogdha	ENSDART00000148206			ENSDARG00000034270.9
CNE14_1_q0.3_peak_301	chr1	1402201	1402800	+	1962	NA	promoter-TSS (ENSDART00000130697.3)	-promoter-TSS (ENSDART00000130697.3)	-197	ENSDART00000130697.3	ENSDARG00000087646	runx1	ENSDART00000130697			ENSDARG00000087646.3
CNE14_1_q0.3_peak_42424	chr20	52270961	52271504	+	1959	NA	promoter-TSS (ENSDART00000074307.6)	-promoter-TSS (ENSDART00000074307.6)	30	ENSDART00000135463.4	ENSDARG00000052454	rhpn1	ENSDART00000135463			ENSDARG00000052454.8
CNE14_1_q0.3_peak_74320	chr7	34467228	34468445	+	1957	NA	Intergenic	Intergenic	5553	ENSDART00000160532.2	ENSDARG00000077910	LOC100332358	ENSDART00000160532			ENSDARG00000077910.5
CNE14_1_q0.3_peak_47101	chr22	21759144	21759468	+	1949	NA	Intergenic	Intergenic	-3340	ENSDART00000105561.6	ENSDARG00000008767	tle2b	ENSDART00000183668			ENSDARG00000008767.12
CNE14_1_q0.3_peak_40487	chr20	16155959	16156647	+	1948	NA	exon (ENSDART00000037420.10, exon 1 of 20)	-exon (ENSDART00000037420.10, exon 1 of 20)	116	ENSDART00000037420.10	ENSDARG00000026519	ralgps2	ENSDART00000037420			ENSDARG00000026519.10
CNE14_1_q0.3_peak_45506	chr21	44158016	44158490	+	1946	NA	Intergenic	Intergenic	45339	ENSDART00000062836.4	ENSDARG00000042811	fgf1b	ENSDART00000062836			ENSDARG00000042811.4
CNE14_1_q0.3_peak_39515	chr20	3997288	3997786	+	1944	NA	promoter-TSS (ENSDART00000092217.6)	-promoter-TSS (ENSDART00000092217.6)	-6	ENSDART00000092217.6	ENSDARG00000063242	ttc13	ENSDART00000092217			ENSDARG00000063242.6
CNE14_1_q0.3_peak_42576	chr20	53624379	53624823	+	1942	NA	promoter-TSS (ENSDART00000083427.5)	-promoter-TSS (ENSDART00000083427.5)	44	ENSDART00000083427.5	ENSDARG00000057352	slc25a29	ENSDART00000083427			ENSDARG00000057352.8
CNE14_1_q0.3_peak_59206	chr3	36835081	36835409	+	1939	NA	Intergenic	Intergenic	3870	ENSDART00000154553.2	ENSDARG00000037895	ramp2	ENSDART00000154553			ENSDARG00000037895.6
CNE14_1_q0.3_peak_66053	chr5	25703858	25704208	+	1934	NA	Intergenic	Intergenic	19046	ENSDART00000014013.9	ENSDARG00000002986	gda	ENSDART00000014013			ENSDARG00000002986.10
CNE14_1_q0.3_peak_17233	chr14	21295337	21295845	+	1928	NA	Intergenic	Intergenic	40794	ENSDART00000054460.6	ENSDARG00000037421	egr1	ENSDART00000054460			ENSDARG00000037421.6
CNE14_1_q0.3_peak_65548	chr5	13645887	13646347	+	1927	NA	promoter-TSS (ENSDART00000099665.4)	-promoter-TSS (ENSDART00000099665.4)	-63	ENSDART00000166957.2	ENSDARG00000068822	LOC564840	ENSDART00000166957			ENSDARG00000068822.5
CNE14_1_q0.3_peak_12285	chr13	825919	826504	+	1920	NA	promoter-TSS (ENSDART00000117461.2)	-promoter-TSS (ENSDART00000117461.2)	14	ENSDART00000117461.2	ENSDARG00000081270	rn7sk	ENSDART00000117461			ENSDARG00000081270.2
CNE14_1_q0.3_peak_58503	chr3	16721987	16722306	+	1918	NA	exon (ENSDART00000008711.10, exon 1 of 16)	-exon (ENSDART00000008711.10, exon 1 of 16)	132	ENSDART00000008711.10	ENSDARG00000016875	gys1	ENSDART00000008711			ENSDARG00000016875.12
CNE14_1_q0.3_peak_1211	chr1	18899821	18900130	+	1916	NA	intron (ENSDART00000184180.1, intron 3 of 12)	-intron (ENSDART00000139241.2, intron 3 of 12)	-20238	ENSDART00000193777.1	ENSDARG00000062055	rnf38	ENSDART00000139241			ENSDARG00000062055.7
CNE14_1_q0.3_peak_40423	chr20	14940863	14941311	+	1914	NA	promoter-TSS (ENSDART00000021394.11)	-promoter-TSS (ENSDART00000021394.11)	-21	ENSDART00000152516.2	ENSDARG00000010905	mettl13	ENSDART00000152516			ENSDARG00000010905.11
CNE14_1_q0.3_peak_54578	chr25	176185	230787	+	1911	NA	intron (ENSDART00000188440.1, intron 1 of 3)	-intron (ENSDART00000188440.1, intron 1 of 3)	533	ENSDART00000191735.1	ENSDARG00000114874	#N/A	ENSDART00000191735			ENSDARG00000114874.1
CNE14_1_q0.3_peak_78055	chr8	20000320	20000858	+	1906	NA	intron (ENSDART00000147631.2, intron 3 of 3)	-intron (ENSDART00000147631.2, intron 3 of 3)	3380	ENSDART00000144666.2	ENSDARG00000078434	znf692	ENSDART00000144666			ENSDARG00000078434.5
CNE14_1_q0.3_peak_1120	chr1	16507653	16508119	+	1906	NA	promoter-TSS (ENSDART00000164949.2)	-promoter-TSS (ENSDART00000164949.2)	-74	ENSDART00000169081.2	ENSDARG00000070412	mtmr7b	ENSDART00000164949			ENSDARG00000070412.7
CNE14_1_q0.3_peak_42525	chr20	53365965	53366321	+	1905	NA	promoter-TSS (ENSDART00000146001.4)	-promoter-TSS (ENSDART00000146001.4)	-6	ENSDART00000146001.4	ENSDARG00000060349	wasf1	ENSDART00000084952			ENSDARG00000060349.8
CNE14_1_q0.3_peak_78930	chr8	42917332	42917758	+	1902	NA	promoter-TSS (ENSDART00000021715.11)	-promoter-TSS (ENSDART00000021715.11)	30	ENSDART00000021715.11	ENSDARG00000017365	slc23a2	ENSDART00000021715			ENSDARG00000017365.12
CNE14_1_q0.3_peak_73712	chr7	18168244	18168782	+	1900	NA	promoter-TSS (ENSDART00000127428.4)	-promoter-TSS (ENSDART00000127428.4)	-20	ENSDART00000127428.4	ENSDARG00000087452	peli3	ENSDART00000127428			ENSDARG00000087452.4
CNE14_1_q0.3_peak_58415	chr3	14061445	14061894	+	1899	NA	Intergenic	Intergenic	41882	ENSDART00000127604.3	ENSDARG00000087188	nfil3.6	ENSDART00000127604			ENSDARG00000087188.3
CNE14_1_q0.3_peak_27453	chr17	32779082	32779643	+	1898	NA	promoter-TSS (ENSDART00000123645.3)	-promoter-TSS (ENSDART00000123645.3)	43	ENSDART00000123645.3	ENSDARG00000055151	smyd2a	ENSDART00000077459			ENSDARG00000055151.7
CNE14_1_q0.3_peak_18919	chr15	1397380	1397943	+	1896	NA	promoter-TSS (ENSDART00000102125.5)	-promoter-TSS (ENSDART00000102125.5)	-150	ENSDART00000102125.5	ENSDARG00000035175	schip1	ENSDART00000102125			ENSDARG00000035175.9
CNE14_1_q0.3_peak_39660	chr20	5005833	5006254	+	1895	NA	intron (ENSDART00000181655.1, intron 3 of 19)	-intron (ENSDART00000138818.4, intron 3 of 20)	-45146	ENSDART00000152802.2	ENSDARG00000096608	#N/A	ENSDART00000152802			ENSDARG00000096608.2
CNE14_1_q0.3_peak_24079	chr16	34425484	34425885	+	1895	NA	promoter-TSS (ENSDART00000172162.2)	-promoter-TSS (ENSDART00000172162.2)	-123	ENSDART00000172162.2	ENSDARG00000105308	#N/A	ENSDART00000172162			ENSDARG00000105308.2
CNE14_1_q0.3_peak_33739	chr19	31802271	31802753	+	1895	NA	promoter-TSS (ENSDART00000103640.5)	-promoter-TSS (ENSDART00000103640.5)	-216	ENSDART00000103640.5	ENSDARG00000070538	hey1	ENSDART00000103640			ENSDARG00000070538.5
CNE14_1_q0.3_peak_2425	chr1	44839056	44839371	+	1894	NA	intron (ENSDART00000162779.2, intron 1 of 21)	-intron (ENSDART00000147357.3, intron 1 of 20)	499	ENSDART00000147357.3	ENSDARG00000059653	kdm2aa	ENSDART00000135067			ENSDARG00000059653.8
CNE14_1_q0.3_peak_26731	chr17	10593111	10593598	+	1894	NA	promoter-TSS (ENSDART00000167188.2)	-promoter-TSS (ENSDART00000167188.2)	-44	ENSDART00000193989.1	ENSDARG00000103746	mapkbp1	ENSDART00000191664			ENSDARG00000103746.2
CNE14_1_q0.3_peak_20100	chr15	14763735	14764767	+	1893	NA	Intergenic	Intergenic	-8933	ENSDART00000160302.2	ENSDARG00000103692	p4ha3	ENSDART00000160302			ENSDARG00000103692.2
CNE14_1_q0.3_peak_19993	chr15	11487049	11489805	+	1893	NA	Intergenic	Intergenic	60807	ENSDART00000168688.2	ENSDARG00000102115	ndufc2	ENSDART00000168688			ENSDARG00000102115.2
CNE14_1_q0.3_peak_10348	chr12	11649976	11650365	+	1892	NA	promoter-TSS (ENSDART00000149713.2)	-promoter-TSS (ENSDART00000149713.2)	24	ENSDART00000150191.2	ENSDARG00000029768	waplb	ENSDART00000150191			ENSDARG00000029768.9
CNE14_1_q0.3_peak_73920	chr7	22718014	22718516	+	1891	NA	promoter-TSS (ENSDART00000027718.9)	-promoter-TSS (ENSDART00000027718.9)	14	ENSDART00000027718.9	ENSDARG00000016260	fxr2	ENSDART00000027718			ENSDARG00000016260.11
CNE14_1_q0.3_peak_51840	chr23	45787584	45787974	+	1890	NA	intron (ENSDART00000186027.1, intron 1 of 3)	-intron (ENSDART00000186027.1, intron 1 of 3)	2216	ENSDART00000186027.1	ENSDARG00000112923	#N/A	ENSDART00000186027			ENSDARG00000112923.1
CNE14_1_q0.3_peak_47045	chr22	20419625	20420323	+	1887	NA	promoter-TSS (ENSDART00000105520.4)	-promoter-TSS (ENSDART00000105520.4)	-314	ENSDART00000105520.4	ENSDARG00000007081	pias4a	ENSDART00000105520			ENSDARG00000007081.10
CNE14_1_q0.3_peak_12033	chr12	48339792	48340306	+	1884	NA	promoter-TSS (ENSDART00000054788.5)	-promoter-TSS (ENSDART00000054788.5)	-84	ENSDART00000152899.3	ENSDARG00000037618	ddit4	ENSDART00000153335			ENSDARG00000037618.7
CNE14_1_q0.3_peak_35236	chr2	2967888	2968277	+	1882	NA	intron (ENSDART00000166449.2, intron 1 of 6)	-intron (ENSDART00000160715.2, intron 2 of 7)	808	ENSDART00000166449.2	ENSDARG00000103038	pik3r3a	ENSDART00000160715			ENSDARG00000103038.2
CNE14_1_q0.3_peak_73607	chr7	16033623	16033984	+	1881	NA	promoter-TSS (ENSDART00000114062.4)	-promoter-TSS (ENSDART00000114062.4)	-120	ENSDART00000161669.2	ENSDARG00000045935	immp1l	ENSDART00000188750			ENSDARG00000045935.6
CNE14_1_q0.3_peak_23774	chr16	25568148	25568513	+	1880	NA	exon (ENSDART00000149411.2, exon 1 of 3)	-exon (ENSDART00000149411.2, exon 1 of 3)	182	ENSDART00000149411.2	ENSDARG00000060862	atxn1b	ENSDART00000149411			ENSDARG00000060862.7
CNE14_1_q0.3_peak_47108	chr22	21897508	21898155	+	1880	NA	promoter-TSS (ENSDART00000105566.5)	-promoter-TSS (ENSDART00000105566.5)	-552	ENSDART00000136795.4	ENSDARG00000010002	gna11a	ENSDART00000136795			ENSDARG00000010002.12
CNE14_1_q0.3_peak_46575	chr22	7672126	7672806	+	1879	NA	Intergenic	Intergenic	-2842	ENSDART00000189617.1	ENSDARG00000116984	#N/A	ENSDART00000189617			ENSDARG00000116984.1
CNE14_1_q0.3_peak_23565	chr16	20055653	20056083	+	1879	NA	promoter-TSS (ENSDART00000027020.9)	-promoter-TSS (ENSDART00000027020.9)	-10	ENSDART00000146436.2	ENSDARG00000009023	ankrd28b	ENSDART00000146436			ENSDARG00000009023.10
CNE14_1_q0.3_peak_8352	chr11	30663879	30664216	+	1879	NA	intron (ENSDART00000161662.2, intron 1 of 14)	-intron (ENSDART00000161662.2, intron 1 of 14)	747	ENSDART00000161662.2	ENSDARG00000056019	ttbk1a	ENSDART00000188846			ENSDARG00000056019.5
CNE14_1_q0.3_peak_84279	chrKN150123.1	36855	37381	+	1877	NA	NA	NA	NA	NA
CNE14_1_q0.3_peak_13905	chr13	24500682	24501226	+	1876	NA	promoter-TSS (ENSDART00000077899.5)	-promoter-TSS (ENSDART00000077899.5)	-9	ENSDART00000077899.5	ENSDARG00000055530	sertad2b	ENSDART00000077899			ENSDARG00000055530.5
CNE14_1_q0.3_peak_47042	chr22	20385104	20385497	+	1875	NA	intron (ENSDART00000089015.6, intron 1 of 3)	-intron (ENSDART00000089015.6, intron 1 of 3)	1682	ENSDART00000089015.6	ENSDARG00000039899	zbtb7a	ENSDART00000089015			ENSDARG00000039899.9
CNE14_1_q0.3_peak_50887	chr23	31372735	31373078	+	1870	NA	promoter-TSS (ENSDART00000053367.8)	-promoter-TSS (ENSDART00000053367.8)	-99	ENSDART00000053367.8	ENSDARG00000036754	hmgn3	ENSDART00000053367			ENSDARG00000036754.8
CNE14_1_q0.3_peak_28898	chr17	52319144	52319574	+	1870	NA	intron (ENSDART00000190302.1, intron 2 of 5)	-intron (ENSDART00000190302.1, intron 2 of 5)	19341	ENSDART00000190302.1	ENSDARG00000100847	esrrb	ENSDART00000190302			ENSDARG00000100847.2
CNE14_1_q0.3_peak_84451	chrKN150351.1	46623	47068	+	1866	NA	NA	NA	NA	NA
CNE14_1_q0.3_peak_20922	chr15	33527512	33528045	+	1865	NA	promoter-TSS (ENSDART00000161151.2)	-promoter-TSS (ENSDART00000161151.2)	-57	ENSDART00000161151.2	ENSDARG00000098954	stard13b	ENSDART00000167705			ENSDARG00000098954.2
CNE14_1_q0.3_peak_65950	chr5	22573520	22573887	+	1865	NA	promoter-TSS (ENSDART00000080882.6)	-promoter-TSS (ENSDART00000080882.6)	-30	ENSDART00000080882.6	ENSDARG00000058088	aifm1	ENSDART00000147513			ENSDARG00000058088.8
CNE14_1_q0.3_peak_7871	chr11	16574544	16575219	+	1862	NA	intron (ENSDART00000104072.6, intron 1 of 3)	-intron (ENSDART00000104072.6, intron 1 of 3)	256	ENSDART00000104072.6	ENSDARG00000070698	kbtbd8	ENSDART00000104072			ENSDARG00000070698.6
CNE14_1_q0.3_peak_24484	chr16	43453937	43454434	+	1862	NA	intron (ENSDART00000159249.2, intron 11 of 16)	-intron (ENSDART00000159249.2, intron 11 of 16)	53180	ENSDART00000110994.5	ENSDARG00000079946	sqlea	ENSDART00000110994			ENSDARG00000079946.5
CNE14_1_q0.3_peak_78306	chr8	26867757	26868205	+	1857	NA	promoter-TSS (ENSDART00000005337.10)	-promoter-TSS (ENSDART00000005337.10)	-124	ENSDART00000005337.10	ENSDARG00000016830	rimkla	ENSDART00000005337			ENSDARG00000016830.10
CNE14_1_q0.3_peak_17249	chr14	21754123	21754789	+	1857	NA	promoter-TSS (ENSDART00000111839.4)	-promoter-TSS (ENSDART00000111839.4)	-65	ENSDART00000111839.4	ENSDARG00000078133	kdm2ab	ENSDART00000186326			ENSDARG00000078133.4
CNE14_1_q0.3_peak_7621	chr11	13159838	13160219	+	1855	NA	promoter-TSS (ENSDART00000064176.8)	-promoter-TSS (ENSDART00000064176.8)	40	ENSDART00000064176.8	ENSDARG00000043705	mob3c	ENSDART00000064176			ENSDARG00000043705.9
CNE14_1_q0.3_peak_46934	chr22	18187860	18188184	+	1854	NA	promoter-TSS (ENSDART00000140106.3)	-promoter-TSS (ENSDART00000140106.3)	-23	ENSDART00000140106.3	ENSDARG00000093170	mef2b	ENSDART00000140106			ENSDARG00000093170.5
CNE14_1_q0.3_peak_42741	chr20	54973176	54973896	+	1851	NA	Intergenic	Intergenic	25061	ENSDART00000153123.2	ENSDARG00000096690	#N/A	ENSDART00000153123			ENSDARG00000096690.2
CNE14_1_q0.3_peak_53354	chr24	26945925	26946283	+	1850	NA	promoter-TSS (ENSDART00000123354.3)	-promoter-TSS (ENSDART00000123354.3)	-714	ENSDART00000123354.3	ENSDARG00000039430	msl2b	ENSDART00000123354			ENSDARG00000039430.7
CNE14_1_q0.3_peak_55357	chr25	7434955	7435307	+	1850	NA	promoter-TSS (ENSDART00000163017.2)	-promoter-TSS (ENSDART00000163017.2)	-160	ENSDART00000172567.2	ENSDARG00000100918	prc1a	ENSDART00000163017			ENSDARG00000100918.2
CNE14_1_q0.3_peak_17188	chr14	20087539	20088077	+	1850	NA	Intergenic	Intergenic	-68669	ENSDART00000123434.3	ENSDARG00000037433	fmr1	ENSDART00000123434			ENSDARG00000037433.7
CNE14_1_q0.3_peak_45464	chr21	43485278	43485741	+	1844	NA	promoter-TSS (ENSDART00000026666.11)	-promoter-TSS (ENSDART00000026666.11)	-3	ENSDART00000026666.11	ENSDARG00000014531	atg4a	ENSDART00000165361			ENSDARG00000014531.13
CNE14_1_q0.3_peak_78207	chr8	25908087	25908471	+	1844	NA	Intergenic	Intergenic	-5508	ENSDART00000190257.1	ENSDARG00000042616	sema3h	ENSDART00000190257			ENSDARG00000042616.6
CNE14_1_q0.3_peak_55028	chr25	3647079	3647568	+	1844	NA	promoter-TSS (ENSDART00000166363.2)	-promoter-TSS (ENSDART00000166363.2)	-46	ENSDART00000166363.2	ENSDARG00000099768	si.ch211.272n13.3	ENSDART00000166363			ENSDARG00000099768.2
CNE14_1_q0.3_peak_29697	chr18	7167728	7168038	+	1843	NA	exon (ENSDART00000114690.4, exon 14 of 51)	-exon (ENSDART00000114690.4, exon 14 of 51)	16100	ENSDART00000134872.2	ENSDARG00000077231	vwf	ENSDART00000142905			ENSDARG00000077231.5
CNE14_1_q0.3_peak_47337	chr22	24984472	24984849	+	1842	NA	promoter-TSS (ENSDART00000142147.3)	-promoter-TSS (ENSDART00000142147.3)	73	ENSDART00000142147.3	ENSDARG00000088841	dnal4b	ENSDART00000142147			ENSDARG00000088841.5
CNE14_1_q0.3_peak_21824	chr15	46356619	46356930	+	1841	NA	promoter-TSS (ENSDART00000154388.3)	-promoter-TSS (ENSDART00000154388.3)	-105	ENSDART00000154388.3	ENSDARG00000097635	#N/A	ENSDART00000155571			ENSDARG00000097635.3
CNE14_1_q0.3_peak_59609	chr3	49503808	49504512	+	1841	NA	promoter-TSS (ENSDART00000168108.2)	-promoter-TSS (ENSDART00000168108.2)	-137	ENSDART00000168108.2	ENSDARG00000100349	prkacaa	ENSDART00000168108			ENSDARG00000100349.2
CNE14_1_q0.3_peak_33512	chr19	24882591	24882980	+	1835	NA	promoter-TSS (ENSDART00000010580.9)	-promoter-TSS (ENSDART00000010580.9)	-60	ENSDART00000010580.9	ENSDARG00000016623	si.ch211.195b13.1	ENSDART00000010580			ENSDARG00000016623.11
CNE14_1_q0.3_peak_77357	chr8	5219645	5220221	+	1834	NA	intron (ENSDART00000035676.5, intron 1 of 5)	-intron (ENSDART00000035676.5, intron 1 of 5)	192	ENSDART00000035676.5	ENSDARG00000025468	bnip3la	ENSDART00000035676			ENSDARG00000025468.5
CNE14_1_q0.3_peak_76983	chr8	2591450	2591853	+	1833	NA	promoter-TSS (ENSDART00000049109.6)	-promoter-TSS (ENSDART00000049109.6)	3	ENSDART00000049109.6	ENSDARG00000031495	seta	ENSDART00000141641			ENSDARG00000031495.6
CNE14_1_q0.3_peak_67301	chr5	56415984	56416422	+	1829	NA	promoter-TSS (ENSDART00000146773.4)	-promoter-TSS (ENSDART00000146773.4)	-15	ENSDART00000146773.4	ENSDARG00000078512	acaca	ENSDART00000083079			ENSDARG00000078512.6
CNE14_1_q0.3_peak_58214	chr3	11607359	11607797	+	1829	NA	intron (ENSDART00000127157.3, intron 2 of 3)	-intron (ENSDART00000127157.3, intron 2 of 3)	17116	ENSDART00000127157.3	ENSDARG00000074752	hlfa	ENSDART00000127157			ENSDARG00000074752.5
CNE14_1_q0.3_peak_17442	chr14	27297416	27297812	+	1827	NA	promoter-TSS (ENSDART00000173423.2)	-promoter-TSS (ENSDART00000173423.2)	-491	ENSDART00000173423.2	ENSDARG00000098652	pcdh11	ENSDART00000173423			ENSDARG00000098652.3
CNE14_1_q0.3_peak_19816	chr15	7282356	7285770	+	1825	NA	Intergenic	Intergenic	53085	ENSDART00000182568.1	ENSDARG00000100227	slc7a1b	ENSDART00000161613			ENSDARG00000100227.2
CNE14_1_q0.3_peak_41667	chr20	47434341	47434786	+	1825	NA	promoter-TSS (ENSDART00000067776.4)	-promoter-TSS (ENSDART00000067776.4)	-146	ENSDART00000067776.4	ENSDARG00000046106	rab10	ENSDART00000067776			ENSDARG00000046106.4
CNE14_1_q0.3_peak_78325	chr8	27555135	27555531	+	1824	NA	promoter-TSS (ENSDART00000016696.8)	-promoter-TSS (ENSDART00000016696.8)	19	ENSDART00000135568.3	ENSDARG00000018328	rhocb	ENSDART00000016696			ENSDARG00000018328.10
CNE14_1_q0.3_peak_52237	chr24	4148793	4149226	+	1823	NA	promoter-TSS (ENSDART00000033494.6)	-promoter-TSS (ENSDART00000033494.6)	-94	ENSDART00000147849.3	ENSDARG00000029072	klf6a	ENSDART00000033494			ENSDARG00000029072.7
CNE14_1_q0.3_peak_27268	chr17	25856528	25856921	+	1822	NA	promoter-TSS (ENSDART00000064817.6)	-promoter-TSS (ENSDART00000064817.6)	53	ENSDART00000064817.6	ENSDARG00000044144	wapla	ENSDART00000185143			ENSDARG00000044144.9
CNE14_1_q0.3_peak_83964	chrKN149693.1	149	16500	+	1822	NA	NA	NA	NA	NA
CNE14_1_q0.3_peak_71066	chr6	48137316	48137695	+	1821	NA	Intergenic	Intergenic	-17449	ENSDART00000019706.10	ENSDARG00000013224	phc2b	ENSDART00000019706			ENSDARG00000013224.10
CNE14_1_q0.3_peak_377	chr1	2112512	2113068	+	1821	NA	promoter-TSS (ENSDART00000131714.3)	-promoter-TSS (ENSDART00000131714.3)	37	ENSDART00000138396.2	ENSDARG00000018460	mbnl2	ENSDART00000098059			ENSDARG00000018460.11
CNE14_1_q0.3_peak_17455	chr14	28052562	28052920	+	1820	NA	promoter-TSS (ENSDART00000135337.2)	-promoter-TSS (ENSDART00000135337.2)	-190	ENSDART00000135337.2	ENSDARG00000033501	tsc22d3	ENSDART00000135337			ENSDARG00000033501.8
CNE14_1_q0.3_peak_4623	chr10	11038074	11038524	+	1817	NA	exon (ENSDART00000047954.6, exon 1 of 9)	-exon (ENSDART00000047954.6, exon 1 of 9)	107	ENSDART00000047954.6	ENSDARG00000058221	ugcg	ENSDART00000047954			ENSDARG00000058221.5
CNE14_1_q0.3_peak_38127	chr2	55297841	55298469	+	1815	NA	promoter-TSS (ENSDART00000149062.2)	-promoter-TSS (ENSDART00000149062.2)	-80	ENSDART00000149062.2	ENSDARG00000067920	rab8a	ENSDART00000149062			ENSDARG00000067920.7
CNE14_1_q0.3_peak_8847	chr11	38553363	38554018	+	1812	NA	exon (ENSDART00000102858.5, exon 1 of 8)	-exon (ENSDART00000102858.5, exon 1 of 8)	704	ENSDART00000102858.5	ENSDARG00000078473	nucks1a	ENSDART00000102858			ENSDARG00000078473.4
CNE14_1_q0.3_peak_5020	chr10	16824971	16827542	+	1811	NA	Intergenic	Intergenic	41955	ENSDART00000171755.2	ENSDARG00000103135	stoml2	ENSDART00000171755			ENSDARG00000103135.2
CNE14_1_q0.3_peak_44503	chr21	30031595	30032290	+	1811	NA	promoter-TSS (ENSDART00000157167.2)	-promoter-TSS (ENSDART00000157167.2)	-546	ENSDART00000157167.2	ENSDARG00000075526	pwwp2a	ENSDART00000153645			ENSDARG00000075526.6
CNE14_1_q0.3_peak_65663	chr5	15350785	15351178	+	1807	NA	promoter-TSS (ENSDART00000061653.5)	-promoter-TSS (ENSDART00000061653.5)	14	ENSDART00000061653.5	ENSDARG00000042069	pebp1	ENSDART00000137287			ENSDARG00000042069.7
CNE14_1_q0.3_peak_84598	chrKN150593.1	10197	10929	+	1807	NA	NA	NA	NA	NA
CNE14_1_q0.3_peak_32838	chr19	8939957	8940324	+	1804	NA	promoter-TSS (ENSDART00000043507.7)	-promoter-TSS (ENSDART00000043507.7)	-72	ENSDART00000043507.7	ENSDARG00000058094	ciarta	ENSDART00000043507			ENSDARG00000058094.5
CNE14_1_q0.3_peak_69918	chr6	21227712	21228101	+	1804	NA	exon (ENSDART00000193583.1, exon 1 of 17)	-exon (ENSDART00000193583.1, exon 1 of 17)	285	ENSDART00000193583.1	ENSDARG00000115657	prkcaa	ENSDART00000193583			ENSDARG00000115657.1
CNE14_1_q0.3_peak_58951	chr3	30248631	30249021	+	1803	NA	promoter-TSS (ENSDART00000077029.4)	-promoter-TSS (ENSDART00000077029.4)	87	ENSDART00000122203.3	ENSDARG00000087732	#N/A	ENSDART00000122203			ENSDARG00000087732.3
CNE14_1_q0.3_peak_55998	chr25	24249945	24250392	+	1799	NA	promoter-TSS (ENSDART00000064646.6)	-promoter-TSS (ENSDART00000064646.6)	-79	ENSDART00000064646.6	ENSDARG00000044034	tmem86a	ENSDART00000064646			ENSDARG00000044034.6
CNE14_1_q0.3_peak_7861	chr11	16395737	16396106	+	1798	NA	promoter-TSS (ENSDART00000115085.4)	-promoter-TSS (ENSDART00000115085.4)	35	ENSDART00000115085.4	ENSDARG00000075625	lrig1	ENSDART00000180981			ENSDARG00000075625.4
CNE14_1_q0.3_peak_16560	chr14	12019882	12020818	+	1795	NA	TTS (ENSDART00000029366.9)	-TTS (ENSDART00000029366.9)	303	ENSDART00000106654.5	ENSDARG00000071868	znf711	ENSDART00000106654			ENSDARG00000071868.5
CNE14_1_q0.3_peak_35701	chr2	7557522	7558363	+	1795	NA	promoter-TSS (ENSDART00000160053.2)	-promoter-TSS (ENSDART00000160053.2)	30	ENSDART00000160053.2	ENSDARG00000104290	ripk2	ENSDART00000160053			ENSDARG00000104290.2
CNE14_1_q0.3_peak_84309	chrKN150165.1	30026	30841	+	1794	NA	NA	NA	NA	NA
CNE14_1_q0.3_peak_24140	chr16	36070003	36070413	+	1793	NA	Intergenic	Intergenic	-6065	ENSDART00000182584.1	ENSDARG00000098135	stk40	ENSDART00000182584			ENSDARG00000098135.2
CNE14_1_q0.3_peak_83442	chr9	53898726	53899431	+	1792	NA	promoter-TSS (ENSDART00000171986.2)	-promoter-TSS (ENSDART00000171986.2)	28	ENSDART00000171986.2	ENSDARG00000101999	cog3	ENSDART00000171986			ENSDARG00000101999.2
CNE14_1_q0.3_peak_7637	chr11	13568253	13568829	+	1790	NA	Intergenic	Intergenic	40104	ENSDART00000011362.9	ENSDARG00000020761	arrdc2	ENSDART00000139889			ENSDARG00000020761.11
CNE14_1_q0.3_peak_39328	chr20	2460607	2461203	+	1788	NA	promoter-TSS (ENSDART00000131642.3)	-promoter-TSS (ENSDART00000131642.3)	41	ENSDART00000131642.3	ENSDARG00000043843	#N/A	ENSDART00000131642			ENSDARG00000043843.7
CNE14_1_q0.3_peak_59598	chr3	49446349	49446965	+	1788	NA	intron (ENSDART00000169047.2, intron 1 of 6)	-intron (ENSDART00000169047.2, intron 1 of 6)	1292	ENSDART00000169047.2	ENSDARG00000102810	samd1a	ENSDART00000169047			ENSDARG00000102810.2
CNE14_1_q0.3_peak_57608	chr3	3810481	3810992	+	1786	NA	promoter-TSS (ENSDART00000056035.7)	-promoter-TSS (ENSDART00000056035.7)	-183	ENSDART00000056035.7	ENSDARG00000038398	LOC100007686	ENSDART00000056035			ENSDARG00000038398.7
CNE14_1_q0.3_peak_20562	chr15	24922340	24922687	+	1786	NA	Intergenic	Intergenic	-14034	ENSDART00000116582.2	ENSDARG00000083597	mir22a	ENSDART00000116582			ENSDARG00000083597.2
CNE14_1_q0.3_peak_83960	chrKN149692.1	9426	17748	+	1783	NA	NA	NA	NA	NA
CNE14_1_q0.3_peak_75689	chr7	66047899	66048278	+	1782	NA	promoter-TSS (ENSDART00000104523.6)	-promoter-TSS (ENSDART00000104523.6)	-14	ENSDART00000104523.6	ENSDARG00000035732	arntl1b	ENSDART00000147837			ENSDARG00000035732.8
CNE14_1_q0.3_peak_61953	chr4	26825321	26908819	+	1781	NA	Intergenic	Intergenic	-105792	ENSDART00000011519.9	ENSDARG00000041205	slc6a1l	ENSDART00000011519			ENSDARG00000041205.8
CNE14_1_q0.3_peak_59475	chr3	45686912	45687664	+	1780	NA	promoter-TSS (ENSDART00000131652.2)	-promoter-TSS (ENSDART00000131652.2)	22	ENSDART00000131652.2	ENSDARG00000059610	gpr146	ENSDART00000131652			ENSDARG00000059610.6
CNE14_1_q0.3_peak_29371	chr18	2548922	2549316	+	1778	NA	promoter-TSS (ENSDART00000186516.1)	-promoter-TSS (ENSDART00000186516.1)	79	ENSDART00000186516.1	ENSDARG00000110183	LOC100537850	ENSDART00000186516			ENSDARG00000110183.1
CNE14_1_q0.3_peak_81160	chr9	8453987	8454324	+	1778	NA	promoter-TSS (ENSDART00000110158.5)	-promoter-TSS (ENSDART00000110158.5)	-95	ENSDART00000110158.5	ENSDARG00000075282	irs2b	ENSDART00000110158			ENSDARG00000075282.6
CNE14_1_q0.3_peak_1928	chr1	33557575	33558017	+	1778	NA	promoter-TSS (ENSDART00000018472.8)	-promoter-TSS (ENSDART00000018472.8)	119	ENSDART00000075632.6	ENSDARG00000053586	creb1a	ENSDART00000187346			ENSDARG00000053586.6
CNE14_1_q0.3_peak_8822	chr11	37997308	37997731	+	1778	NA	promoter-TSS (ENSDART00000102870.5)	-promoter-TSS (ENSDART00000102870.5)	-100	ENSDART00000102870.5	ENSDARG00000070214	slc41a1	ENSDART00000102870			ENSDARG00000070214.5
CNE14_1_q0.3_peak_48505	chr22	38301106	38301546	+	1777	NA	promoter-TSS (ENSDART00000137339.3)	-promoter-TSS (ENSDART00000137339.3)	-39	ENSDART00000137339.3	ENSDARG00000017240	traf5	ENSDART00000137339			ENSDARG00000017240.12
CNE14_1_q0.3_peak_50592	chr23	22157869	22185651	+	1776	NA	Intergenic	Intergenic	-28707	ENSDART00000025414.7	ENSDARG00000001437	slc2a1a	ENSDART00000025414			ENSDARG00000001437.11
CNE14_1_q0.3_peak_36931	chr2	38117342	38117758	+	1776	NA	promoter-TSS (ENSDART00000013676.9)	-promoter-TSS (ENSDART00000013676.9)	-12	ENSDART00000013676.9	ENSDARG00000075543	chd8	ENSDART00000131837			ENSDARG00000075543.5
CNE14_1_q0.3_peak_52850	chr24	17005487	17006234	+	1776	NA	intron (ENSDART00000149149.3, intron 1 of 7)	-intron (ENSDART00000149149.3, intron 1 of 7)	182	ENSDART00000149406.2	ENSDARG00000074453	zfx	ENSDART00000110652			ENSDARG00000074453.5
CNE14_1_q0.3_peak_23139	chr16	11150867	11151753	+	1771	NA	promoter-TSS (ENSDART00000140674.3)	-promoter-TSS (ENSDART00000140674.3)	-389	ENSDART00000140674.3	ENSDARG00000055502	cicb	ENSDART00000140674			ENSDARG00000055502.8
CNE14_1_q0.3_peak_24554	chr16	45693276	45693775	+	1768	NA	exon (ENSDART00000060809.6, exon 1 of 22)	-exon (ENSDART00000060809.6, exon 1 of 22)	112	ENSDART00000060809.6	ENSDARG00000041481	smg5	ENSDART00000060809			ENSDARG00000041481.6
CNE14_1_q0.3_peak_53592	chr24	33462184	33462847	+	1767	NA	promoter-TSS (ENSDART00000050826.9)	-promoter-TSS (ENSDART00000050826.9)	-285	ENSDART00000166666.2	ENSDARG00000029307	rmc1	ENSDART00000050826			ENSDARG00000029307.10
CNE14_1_q0.3_peak_40985	chr20	29505753	29506115	+	1766	NA	promoter-TSS (ENSDART00000148278.2)	-promoter-TSS (ENSDART00000148278.2)	-71	ENSDART00000148278.2	ENSDARG00000030844	klf11a	ENSDART00000148278			ENSDARG00000030844.8
CNE14_1_q0.3_peak_40764	chr20	23254272	23254691	+	1764	NA	promoter-TSS (ENSDART00000103365.5)	-promoter-TSS (ENSDART00000103365.5)	4	ENSDART00000152905.2	ENSDARG00000096718	#N/A	ENSDART00000152905			ENSDARG00000096718.2
CNE14_1_q0.3_peak_73446	chr7	12065398	12065847	+	1764	NA	promoter-TSS (ENSDART00000101537.5)	-promoter-TSS (ENSDART00000101537.5)	46	ENSDART00000101537.5	ENSDARG00000058369	mex3b	ENSDART00000101537			ENSDARG00000058369.7
CNE14_1_q0.3_peak_5615	chr10	35264896	35265322	+	1763	NA	promoter-TSS (ENSDART00000048831.7)	-promoter-TSS (ENSDART00000048831.7)	26	ENSDART00000048831.7	ENSDARG00000030914	tmem120a	ENSDART00000048831			ENSDARG00000030914.7
CNE14_1_q0.3_peak_6271	chr10	44053717	44054035	+	1761	NA	Intergenic	Intergenic	-3301	ENSDART00000164610.3	ENSDARG00000104094	grk3	ENSDART00000183868			ENSDARG00000104094.3
CNE14_1_q0.3_peak_36986	chr2	39675692	39676096	+	1761	NA	promoter-TSS (ENSDART00000147821.2)	-promoter-TSS (ENSDART00000147821.2)	-65	ENSDART00000147821.2	ENSDARG00000016084	spsb4a	ENSDART00000147821			ENSDARG00000016084.9
CNE14_1_q0.3_peak_54419	chr24	41334430	41334834	+	1758	NA	Intergenic	Intergenic	-14595	ENSDART00000129058.3	ENSDARG00000090213	#N/A	ENSDART00000129058			ENSDARG00000090213.3
CNE14_1_q0.3_peak_65140	chr5	6796093	6796545	+	1757	NA	promoter-TSS (ENSDART00000165308.2)	-promoter-TSS (ENSDART00000165308.2)	28	ENSDART00000166868.2	ENSDARG00000100718	me2	ENSDART00000165308			ENSDARG00000100718.2
CNE14_1_q0.3_peak_55894	chr25	21715907	21716407	+	1757	NA	promoter-TSS (ENSDART00000148920.2)	-promoter-TSS (ENSDART00000148920.2)	-106	ENSDART00000148920.2	ENSDARG00000025346	znf277	ENSDART00000148920			ENSDARG00000025346.9
CNE14_1_q0.3_peak_74928	chr7	51249371	51249827	+	1753	NA	promoter-TSS (ENSDART00000174121.2)	-promoter-TSS (ENSDART00000174121.2)	-64	ENSDART00000174297.2	ENSDARG00000105693	LOC794462	ENSDART00000174297			ENSDARG00000105693.2
CNE14_1_q0.3_peak_46416	chr22	4407627	4408031	+	1751	NA	promoter-TSS (ENSDART00000162523.2)	-promoter-TSS (ENSDART00000162523.2)	42	ENSDART00000162523.2	ENSDARG00000099675	kdm4b	ENSDART00000181893			ENSDARG00000099675.2
CNE14_1_q0.3_peak_55030	chr25	3745180	3745574	+	1751	NA	promoter-TSS (ENSDART00000037973.6)	-promoter-TSS (ENSDART00000037973.6)	16	ENSDART00000037973.6	ENSDARG00000028539	morc2	ENSDART00000037973			ENSDARG00000028539.6
CNE14_1_q0.3_peak_26483	chr17	5610311	5611234	+	1749	NA	promoter-TSS (ENSDART00000004043.6)	-promoter-TSS (ENSDART00000004043.6)	-258	ENSDART00000004043.6	ENSDARG00000006877	enpp4	ENSDART00000004043			ENSDARG00000006877.8
CNE14_1_q0.3_peak_35785	chr2	8717009	8717856	+	1749	NA	intron (ENSDART00000137872.2, intron 1 of 3)	-intron (ENSDART00000018114.9, intron 1 of 23)	260	ENSDART00000133037.2	ENSDARG00000016163	usp33	ENSDART00000133037			ENSDARG00000016163.10
CNE14_1_q0.3_peak_56031	chr25	25507258	25507794	+	1747	NA	promoter-TSS (ENSDART00000116620.2)	-promoter-TSS (ENSDART00000116620.2)	-969	ENSDART00000150719.3	ENSDARG00000075252	phrf1	ENSDART00000188980			ENSDARG00000075252.7
CNE14_1_q0.3_peak_74558	chr7	41887154	41887792	+	1746	NA	promoter-TSS (ENSDART00000115090.7)	-promoter-TSS (ENSDART00000115090.7)	44	ENSDART00000115090.7	ENSDARG00000012199	gpt2	ENSDART00000115090			ENSDARG00000012199.12
CNE14_1_q0.3_peak_35430	chr2	5753651	5754047	+	1743	NA	intron (ENSDART00000133851.3, intron 3 of 6)	-intron (ENSDART00000133851.3, intron 3 of 6)	22181	ENSDART00000133851.3	ENSDARG00000093357	nyap2b	ENSDART00000133851			ENSDARG00000093357.3
CNE14_1_q0.3_peak_33487	chr19	23918840	23919201	+	1742	NA	promoter-TSS (ENSDART00000079842.5)	-promoter-TSS (ENSDART00000079842.5)	-76	ENSDART00000090200.6	ENSDARG00000062382	snapin	ENSDART00000090200			ENSDARG00000062382.6
CNE14_1_q0.3_peak_58525	chr3	17030334	17030714	+	1740	NA	promoter-TSS (ENSDART00000080854.7)	-promoter-TSS (ENSDART00000080854.7)	-141	ENSDART00000104519.6	ENSDARG00000022712	stat3	ENSDART00000159849			ENSDARG00000022712.12
CNE14_1_q0.3_peak_44955	chr21	38730345	38730796	+	1740	NA	promoter-TSS (ENSDART00000111885.4)	-promoter-TSS (ENSDART00000111885.4)	-7	ENSDART00000151333.3	ENSDARG00000077870	taf9	ENSDART00000151534			ENSDARG00000077870.4
CNE14_1_q0.3_peak_2624	chr1	50527913	50528343	+	1739	NA	promoter-TSS (ENSDART00000024984.9)	-promoter-TSS (ENSDART00000024984.9)	-164	ENSDART00000024984.9	ENSDARG00000057099	papss1	ENSDART00000024984			ENSDARG00000057099.7
CNE14_1_q0.3_peak_43991	chr21	14668927	14669258	+	1739	NA	intron (ENSDART00000123047.3, intron 1 of 26)	-intron (ENSDART00000123047.3, intron 1 of 26)	-4647	ENSDART00000124223.3	ENSDARG00000026634	ehmt1b	ENSDART00000123047			ENSDARG00000026634.10
CNE14_1_q0.3_peak_71530	chr6	54611255	54611661	+	1737	NA	intron (ENSDART00000093199.6, intron 2 of 12)	-intron (ENSDART00000093199.6, intron 2 of 12)	34879	ENSDART00000157142.2	ENSDARG00000063649	tead3b	ENSDART00000093199			ENSDARG00000063649.7
CNE14_1_q0.3_peak_60294	chr3	57425897	57426218	+	1737	NA	promoter-TSS (ENSDART00000033716.5)	-promoter-TSS (ENSDART00000033716.5)	-96	ENSDART00000033716.5	ENSDARG00000025428	socs3a	ENSDART00000033716			ENSDARG00000025428.5
CNE14_1_q0.3_peak_44696	chr21	34119566	34119875	+	1733	NA	promoter-TSS (ENSDART00000024750.8)	-promoter-TSS (ENSDART00000024750.8)	-39	ENSDART00000024750.8	ENSDARG00000006408	hmgb3b	ENSDART00000128242			ENSDARG00000006408.9
CNE14_1_q0.3_peak_23666	chr16	21841669	22078333	+	1731	NA	intron (ENSDART00000188217.1, intron 17 of 26)	-intron (ENSDART00000116114.4, intron 21 of 30)	41498	ENSDART00000167919.2	ENSDARG00000102774	znf687a	ENSDART00000167919			ENSDARG00000102774.2
CNE14_1_q0.3_peak_55982	chr25	23582872	23583301	+	1730	NA	promoter-TSS (ENSDART00000103704.5)	-promoter-TSS (ENSDART00000103704.5)	15	ENSDART00000149107.2	ENSDARG00000070560	nap1l4a	ENSDART00000184903			ENSDARG00000070560.6
CNE14_1_q0.3_peak_65854	chr5	20319199	20319777	+	1725	NA	promoter-TSS (ENSDART00000004217.9)	-promoter-TSS (ENSDART00000004217.9)	-31	ENSDART00000004217.9	ENSDARG00000035598	coro1ca	ENSDART00000193141			ENSDARG00000035598.6
CNE14_1_q0.3_peak_83309	chr9	52759582	52760208	+	1723	NA	intron (ENSDART00000140771.2, intron 2 of 15)	-intron (ENSDART00000007401.9, intron 2 of 15)	17699	ENSDART00000162199.2	ENSDARG00000099404	#N/A	ENSDART00000162199			ENSDARG00000099404.2
CNE14_1_q0.3_peak_3897	chr10	2712919	2713580	+	1722	NA	promoter-TSS (ENSDART00000123754.3)	-promoter-TSS (ENSDART00000123754.3)	-9	ENSDART00000126236.3	ENSDARG00000006253	mier3a	ENSDART00000123754			ENSDARG00000006253.9
CNE14_1_q0.3_peak_4333	chr10	6010255	6010622	+	1721	NA	promoter-TSS (ENSDART00000163680.2)	-promoter-TSS (ENSDART00000163680.2)	-132	ENSDART00000190025.1	ENSDARG00000103025	hmgcs1	ENSDART00000190025			ENSDARG00000103025.2
CNE14_1_q0.3_peak_27119	chr17	21198664	21199381	+	1719	NA	intron (ENSDART00000104708.6, intron 1 of 13)	-intron (ENSDART00000104708.6, intron 1 of 13)	1384	ENSDART00000104708.6	ENSDARG00000071004	abhd12	ENSDART00000157283			ENSDARG00000071004.7
CNE14_1_q0.3_peak_6356	chr10	45345262	45346104	+	1718	NA	exon (ENSDART00000166085.2, exon 1 of 5)	-exon (ENSDART00000166085.2, exon 1 of 5)	109	ENSDART00000166085.2	ENSDARG00000103994	ppiab	ENSDART00000166085			ENSDARG00000103994.2
CNE14_1_q0.3_peak_23574	chr16	20294189	20294589	+	1716	NA	promoter-TSS (ENSDART00000059619.5)	-promoter-TSS (ENSDART00000059619.5)	-153	ENSDART00000059623.5	ENSDARG00000040698	plekha8	ENSDART00000059623			ENSDARG00000040698.6
CNE14_1_q0.3_peak_59046	chr3	32842462	32842934	+	1714	NA	promoter-TSS (ENSDART00000122228.3)	-promoter-TSS (ENSDART00000122228.3)	-96	ENSDART00000172682.2	ENSDARG00000089232	prr14	ENSDART00000122228			ENSDARG00000089232.3
CNE14_1_q0.3_peak_60153	chr3	56541446	56541949	+	1712	NA	promoter-TSS (ENSDART00000050576.8)	-promoter-TSS (ENSDART00000050576.8)	26	ENSDART00000156398.2	ENSDARG00000089829	#N/A	ENSDART00000156398			ENSDARG00000089829.4
CNE14_1_q0.3_peak_84688	chrKN150708.1	31360	31759	+	1710	NA	NA	NA	NA	NA
CNE14_1_q0.3_peak_30598	chr18	30421288	30421778	+	1707	NA	promoter-TSS (ENSDART00000140908.3)	-promoter-TSS (ENSDART00000140908.3)	5	ENSDART00000140908.3	ENSDARG00000062020	gse1	ENSDART00000177669			ENSDARG00000062020.9
CNE14_1_q0.3_peak_21305	chr15	41806967	41807483	+	1706	NA	exon (ENSDART00000156819.2, exon 1 of 7)	-exon (ENSDART00000156819.2, exon 1 of 7)	146	ENSDART00000156819.2	ENSDARG00000015915	slc25a36b	ENSDART00000156819			ENSDARG00000015915.8
CNE14_1_q0.3_peak_77579	chr8	7637392	7637838	+	1706	NA	promoter-TSS (ENSDART00000040672.7)	-promoter-TSS (ENSDART00000040672.7)	11	ENSDART00000123882.4	ENSDARG00000014218	mecp2	ENSDART00000040672			ENSDARG00000014218.10
CNE14_1_q0.3_peak_7934	chr11	18749564	18749907	+	1704	NA	Intergenic	Intergenic	42099	ENSDART00000156431.2	ENSDARG00000002037	pfkfb2b	ENSDART00000189116			ENSDARG00000002037.11
CNE14_1_q0.3_peak_30216	chr18	22605932	22606307	+	1703	NA	promoter-TSS (ENSDART00000128965.3)	-promoter-TSS (ENSDART00000128965.3)	-140	ENSDART00000128965.3	ENSDARG00000056525	bcar1	ENSDART00000176130			ENSDARG00000056525.9
CNE14_1_q0.3_peak_80897	chr9	4856729	4857180	+	1701	NA	promoter-TSS (ENSDART00000016814.10)	-promoter-TSS (ENSDART00000016814.10)	-187	ENSDART00000138015.3	ENSDARG00000012586	fmnl2a	ENSDART00000133090			ENSDARG00000012586.13
CNE14_1_q0.3_peak_60786	chr3	60690407	60690883	+	1701	NA	intron (ENSDART00000184119.1, intron 2 of 2)	-intron (ENSDART00000184119.1, intron 2 of 2)	20482	ENSDART00000184119.1	ENSDARG00000115335	ubald2	ENSDART00000184119			ENSDARG00000115335.1
CNE14_1_q0.3_peak_11182	chr12	35105550	35105869	+	1701	NA	promoter-TSS (ENSDART00000153034.2)	-promoter-TSS (ENSDART00000153034.2)	-39	ENSDART00000153034.2	ENSDARG00000096797	si.ch73.127m5.2	ENSDART00000153034			ENSDARG00000096797.2
CNE14_1_q0.3_peak_66287	chr5	32801338	32801678	+	1697	NA	intron (ENSDART00000188900.1, intron 10 of 10)	-intron (ENSDART00000050041.8, intron 7 of 8)	10263	ENSDART00000077189.5	ENSDARG00000054906	ier5l	ENSDART00000077189			ENSDARG00000054906.5
CNE14_1_q0.3_peak_43921	chr21	12035999	12036317	+	1697	NA	promoter-TSS (ENSDART00000031658.7)	-promoter-TSS (ENSDART00000031658.7)	-24	ENSDART00000131607.2	ENSDARG00000011926	tpgs2	ENSDART00000131607			ENSDARG00000011926.9
CNE14_1_q0.3_peak_67291	chr5	55751436	55752340	+	1697	NA	intron (ENSDART00000097424.6, intron 1 of 6)	-intron (ENSDART00000097424.6, intron 1 of 6)	281	ENSDART00000097424.6	ENSDARG00000067656	kcmf1	ENSDART00000097424			ENSDARG00000067656.6
CNE14_1_q0.3_peak_81201	chr9	9228628	9229214	+	1696	NA	promoter-TSS (ENSDART00000121665.3)	-promoter-TSS (ENSDART00000121665.3)	20	ENSDART00000121665.3	ENSDARG00000010946	cbsb	ENSDART00000180301			ENSDARG00000010946.11
CNE14_1_q0.3_peak_31873	chr18	49116138	49116568	+	1696	NA	promoter-TSS (ENSDART00000174157.2)	-promoter-TSS (ENSDART00000174157.2)	29	ENSDART00000174157.2	ENSDARG00000099137	LOC100333499	ENSDART00000160702			ENSDARG00000099137.3
CNE14_1_q0.3_peak_5165	chr10	21434592	21435328	+	1695	NA	exon (ENSDART00000193938.1, exon 1 of 10)	-exon (ENSDART00000193938.1, exon 1 of 10)	166	ENSDART00000142447.2	ENSDARG00000043976	etf1b	ENSDART00000193938			ENSDARG00000043976.5
CNE14_1_q0.3_peak_79772	chr8	51846302	51846699	+	1694	NA	intron (ENSDART00000109785.4, intron 34 of 41)	-intron (ENSDART00000109785.4, intron 34 of 41)	-39916	ENSDART00000146976.2	ENSDARG00000094868	#N/A	ENSDART00000146976			ENSDARG00000094868.2
CNE14_1_q0.3_peak_67250	chr5	55006145	55006500	+	1694	NA	intron (ENSDART00000088325.5, intron 4 of 26)	-intron (ENSDART00000088325.5, intron 4 of 26)	67669	ENSDART00000145765.3	ENSDARG00000093750	cd180	ENSDART00000145765			ENSDARG00000093750.3
CNE14_1_q0.3_peak_26800	chr17	11418489	11418994	+	1691	NA	promoter-TSS (ENSDART00000064412.7)	-promoter-TSS (ENSDART00000064412.7)	-188	ENSDART00000151847.4	ENSDARG00000043873	arid4a	ENSDART00000103228			ENSDARG00000043873.10
CNE14_1_q0.3_peak_8276	chr11	27953293	27953823	+	1689	NA	promoter-TSS (ENSDART00000168338.3)	-promoter-TSS (ENSDART00000168338.3)	-423	ENSDART00000168338.3	ENSDARG00000061737	ece1	ENSDART00000136859			ENSDARG00000061737.9
CNE14_1_q0.3_peak_57721	chr3	5574725	5575422	+	1688	NA	promoter-TSS (ENSDART00000101807.4)	-promoter-TSS (ENSDART00000101807.4)	-240	ENSDART00000134693.2	ENSDARG00000027360	si.ch211.106h11.3	ENSDART00000101807			ENSDARG00000027360.9
CNE14_1_q0.3_peak_27301	chr17	27273110	27273535	+	1688	NA	promoter-TSS (ENSDART00000077087.5)	-promoter-TSS (ENSDART00000077087.5)	-26	ENSDART00000077087.5	ENSDARG00000054823	id3	ENSDART00000077087			ENSDARG00000054823.5
CNE14_1_q0.3_peak_46771	chr22	11438389	11438822	+	1687	NA	promoter-TSS (ENSDART00000007649.6)	-promoter-TSS (ENSDART00000007649.6)	22	ENSDART00000007649.6	ENSDARG00000019302	mid1ip1b	ENSDART00000007649			ENSDARG00000019302.7
CNE14_1_q0.3_peak_23885	chr16	29194275	29194725	+	1687	NA	promoter-TSS (ENSDART00000046114.8)	-promoter-TSS (ENSDART00000046114.8)	17	ENSDART00000046114.8	ENSDARG00000040237	mef2d	ENSDART00000147591			ENSDARG00000040237.10
CNE14_1_q0.3_peak_11446	chr12	41413391	41413746	+	1686	NA	Intergenic	Intergenic	-6787	ENSDART00000158811.2	ENSDARG00000101579	epc1a	ENSDART00000158811			ENSDARG00000101579.2
CNE14_1_q0.3_peak_84358	chrKN150222.1	74447	74937	+	1684	NA	NA	NA	NA	NA
CNE14_1_q0.3_peak_37504	chr2	48073969	48074278	+	1684	NA	promoter-TSS (ENSDART00000056291.6)	-promoter-TSS (ENSDART00000056291.6)	-120	ENSDART00000056291.6	ENSDARG00000038561	klf6b	ENSDART00000056291			ENSDARG00000038561.6
CNE14_1_q0.3_peak_24365	chr16	42345810	42346124	+	1683	NA	intron (ENSDART00000193214.1, intron 3 of 4)	-intron (ENSDART00000102305.5, intron 3 of 5)	28213	ENSDART00000148635.2	ENSDARG00000069981	cspg5a	ENSDART00000193214			ENSDARG00000069981.6
CNE14_1_q0.3_peak_24286	chr16	39901471	39901848	+	1681	NA	promoter-TSS (ENSDART00000136719.3)	-promoter-TSS (ENSDART00000136719.3)	-994	ENSDART00000136719.3	ENSDARG00000044574	rbms3	ENSDART00000138388			ENSDARG00000044574.9
CNE14_1_q0.3_peak_1401	chr1	25157594	25158086	+	1680	NA	intron (ENSDART00000144711.2, intron 8 of 8)	-intron (ENSDART00000144711.2, intron 8 of 8)	-13401	ENSDART00000132355.4	ENSDARG00000060994	fbxw7	ENSDART00000132355			ENSDARG00000060994.7
CNE14_1_q0.3_peak_65431	chr5	11223335	11223815	+	1679	NA	Intergenic	Intergenic	47634	ENSDART00000122084.3	ENSDARG00000086512	prodhb	ENSDART00000122084			ENSDARG00000086512.3
CNE14_1_q0.3_peak_5879	chr10	40251110	40251790	+	1677	NA	intron (ENSDART00000109689.4, intron 3 of 18)	-intron (ENSDART00000109689.4, intron 3 of 18)	15491	ENSDART00000145862.3	ENSDARG00000075383	gramd1ba	ENSDART00000109689			ENSDARG00000075383.7
CNE14_1_q0.3_peak_60946	chr3	62432714	62433199	+	1677	NA	promoter-TSS (ENSDART00000154894.2)	-promoter-TSS (ENSDART00000154894.2)	55	ENSDART00000154894.2	ENSDARG00000097714	#N/A	ENSDART00000154894			ENSDARG00000097714.2
CNE14_1_q0.3_peak_18234	chr14	47314138	47314517	+	1673	NA	promoter-TSS (ENSDART00000164851.2)	-promoter-TSS (ENSDART00000164851.2)	13	ENSDART00000164851.2	ENSDARG00000040198	fstl5	ENSDART00000159608			ENSDARG00000040198.9
CNE14_1_q0.3_peak_16656	chr14	13453040	13453385	+	1670	NA	promoter-TSS (ENSDART00000054849.7)	-promoter-TSS (ENSDART00000054849.7)	82	ENSDART00000054849.7	ENSDARG00000037655	pls3	ENSDART00000054849			ENSDARG00000037655.7
CNE14_1_q0.3_peak_70248	chr6	25952753	25953113	+	1669	NA	promoter-TSS (ENSDART00000076997.6)	-promoter-TSS (ENSDART00000076997.6)	-63	ENSDART00000148748.2	ENSDARG00000054749	lmo4b	ENSDART00000148748			ENSDARG00000054749.6
CNE14_1_q0.3_peak_59243	chr3	37571534	37572024	+	1669	NA	promoter-TSS (ENSDART00000016407.7)	-promoter-TSS (ENSDART00000016407.7)	-178	ENSDART00000016407.7	ENSDARG00000014763	arf2a	ENSDART00000149258			ENSDARG00000014763.8
CNE14_1_q0.3_peak_76987	chr8	2642044	2642857	+	1667	NA	promoter-TSS (ENSDART00000143242.2)	-promoter-TSS (ENSDART00000143242.2)	66	ENSDART00000143242.2	ENSDARG00000062753	naif1	ENSDART00000143242			ENSDARG00000062753.7
CNE14_1_q0.3_peak_67162	chr5	53580966	53581743	+	1667	NA	promoter-TSS (ENSDART00000161682.2)	-promoter-TSS (ENSDART00000161682.2)	-135	ENSDART00000161682.2	ENSDARG00000100423	#N/A	ENSDART00000161682			ENSDARG00000100423.2
CNE14_1_q0.3_peak_41055	chr20	32312699	32313023	+	1667	NA	intron (ENSDART00000062982.4, intron 2 of 3)	-intron (ENSDART00000062982.4, intron 2 of 3)	19875	ENSDART00000062982.4	ENSDARG00000042904	foxo3b	ENSDART00000062982			ENSDARG00000042904.7
CNE14_1_q0.3_peak_59517	chr3	46559430	46559867	+	1665	NA	promoter-TSS (ENSDART00000127832.4)	-promoter-TSS (ENSDART00000127832.4)	9	ENSDART00000146189.3	ENSDARG00000052617	raver1	ENSDART00000151035			ENSDARG00000052617.8
CNE14_1_q0.3_peak_17102	chr14	16765793	16766132	+	1663	NA	promoter-TSS (ENSDART00000140061.3)	-promoter-TSS (ENSDART00000140061.3)	-30	ENSDART00000140061.3	ENSDARG00000075014	sqstm1	ENSDART00000140061			ENSDARG00000075014.5
CNE14_1_q0.3_peak_11838	chr12	46771560	46771918	+	1662	NA	Intergenic	Intergenic	-20168	ENSDART00000110304.4	ENSDARG00000098695	vclb	ENSDART00000110304			ENSDARG00000098695.3
CNE14_1_q0.3_peak_17573	chr14	30945215	30945584	+	1658	NA	exon (ENSDART00000161540.2, exon 1 of 8)	-exon (ENSDART00000161540.2, exon 1 of 8)	116	ENSDART00000161540.2	ENSDARG00000102379	si.zfos.80g12.1	ENSDART00000161540			ENSDARG00000102379.3
CNE14_1_q0.3_peak_3254	chr1	58880100	58880635	+	1657	NA	exon (ENSDART00000188136.1, exon 1 of 4)	-exon (ENSDART00000188136.1, exon 1 of 4)	246	ENSDART00000188136.1	ENSDARG00000113332	#N/A	ENSDART00000188136			ENSDARG00000113332.1
CNE14_1_q0.3_peak_69259	chr6	6258391	6258745	+	1656	NA	promoter-TSS (ENSDART00000081966.5)	-promoter-TSS (ENSDART00000081966.5)	-117	ENSDART00000125918.4	ENSDARG00000044601	rtn4a	ENSDART00000125918			ENSDARG00000044601.9
CNE14_1_q0.3_peak_58806	chr3	25491020	25491515	+	1656	NA	promoter-TSS (ENSDART00000136495.2)	-promoter-TSS (ENSDART00000136495.2)	-66	ENSDART00000136495.2	ENSDARG00000038059	grb2b	ENSDART00000055473			ENSDARG00000038059.7
CNE14_1_q0.3_peak_45381	chr21	42717094	42717637	+	1654	NA	promoter-TSS (ENSDART00000166936.2)	-promoter-TSS (ENSDART00000166936.2)	-59	ENSDART00000166936.2	ENSDARG00000103251	sh3pxd2b	ENSDART00000172135			ENSDARG00000103251.3
CNE14_1_q0.3_peak_20283	chr15	18129861	18130502	+	1653	NA	promoter-TSS (ENSDART00000078723.6)	-promoter-TSS (ENSDART00000078723.6)	72	ENSDART00000078723.6	ENSDARG00000025302	dixdc1a	ENSDART00000137828			ENSDARG00000025302.11
CNE14_1_q0.3_peak_32895	chr19	11015069	11015467	+	1652	NA	promoter-TSS (ENSDART00000010997.8)	-promoter-TSS (ENSDART00000010997.8)	-30	ENSDART00000010997.8	ENSDARG00000005162	tpm3	ENSDART00000137865			ENSDARG00000005162.11
CNE14_1_q0.3_peak_61573	chr4	15103483	15103836	+	1652	NA	promoter-TSS (ENSDART00000138183.2)	-promoter-TSS (ENSDART00000138183.2)	-13	ENSDART00000138183.2	ENSDARG00000000018	nrf1	ENSDART00000181044			ENSDARG00000000018.9
CNE14_1_q0.3_peak_67467	chr5	58996943	58997298	+	1648	NA	promoter-TSS (ENSDART00000033923.6)	-promoter-TSS (ENSDART00000033923.6)	355	ENSDART00000062175.7	ENSDARG00000042401	derl2	ENSDART00000062175			ENSDARG00000042401.7
CNE14_1_q0.3_peak_32949	chr19	11985408	11985913	+	1648	NA	promoter-TSS (ENSDART00000130537.3)	-promoter-TSS (ENSDART00000130537.3)	88	ENSDART00000130537.3	ENSDARG00000004017	spag1a	ENSDART00000185960			ENSDARG00000004017.10
CNE14_1_q0.3_peak_24593	chr16	46294067	46294522	+	1648	NA	promoter-TSS (ENSDART00000040769.7)	-promoter-TSS (ENSDART00000040769.7)	-43	ENSDART00000040769.7	ENSDARG00000033172	nr2f5	ENSDART00000040769			ENSDARG00000033172.7
CNE14_1_q0.3_peak_37755	chr2	52390304	52390617	+	1644	NA	Intergenic	Intergenic	-25209	ENSDART00000097716.4	ENSDARG00000067832	tle2c	ENSDART00000097716			ENSDARG00000067832.6
CNE14_1_q0.3_peak_31180	chr18	41189152	41189741	+	1643	NA	Intergenic	Intergenic	22534	ENSDART00000171431.2	ENSDARG00000100607	zbtb38	ENSDART00000171431			ENSDARG00000100607.2
CNE14_1_q0.3_peak_32739	chr19	6383670	6384024	+	1642	NA	intron (ENSDART00000104950.4, intron 1 of 20)	-intron (ENSDART00000104950.4, intron 1 of 20)	1747	ENSDART00000104950.4	ENSDARG00000018259	atp1a3a	ENSDART00000104950			ENSDARG00000018259.9
CNE14_1_q0.3_peak_46439	chr22	4768859	4769227	+	1640	NA	promoter-TSS (ENSDART00000165235.2)	-promoter-TSS (ENSDART00000165235.2)	97	ENSDART00000165235.2	ENSDARG00000103979	calr3a	ENSDART00000165235			ENSDARG00000103979.2
CNE14_1_q0.3_peak_44323	chr21	25839332	25846164	+	1638	NA	Intergenic	Intergenic	40558	ENSDART00000128987.4	ENSDARG00000025567	nf2b	ENSDART00000128987			ENSDARG00000025567.10
CNE14_1_q0.3_peak_40923	chr20	26960678	26961008	+	1637	NA	exon (ENSDART00000062066.5, exon 2 of 2)	-exon (ENSDART00000062066.5, exon 2 of 2)	1913	ENSDART00000132441.2	ENSDARG00000095639	#N/A	ENSDART00000132441			ENSDARG00000095639.2
CNE14_1_q0.3_peak_20791	chr15	30816369	30816717	+	1636	NA	promoter-TSS (ENSDART00000050649.10)	-promoter-TSS (ENSDART00000050649.10)	13	ENSDART00000100194.5	ENSDARG00000032614	msi2b	ENSDART00000155212			ENSDARG00000032614.11
CNE14_1_q0.3_peak_20422	chr15	21836626	21837213	+	1633	NA	exon (ENSDART00000089953.6, exon 1 of 15)	-exon (ENSDART00000089953.6, exon 1 of 15)	288	ENSDART00000089953.6	ENSDARG00000062315	sik2b	ENSDART00000089953			ENSDARG00000062315.6
CNE14_1_q0.3_peak_80636	chr9	3054079	3054485	+	1633	NA	promoter-TSS (ENSDART00000140614.2)	-promoter-TSS (ENSDART00000140614.2)	-741	ENSDART00000140614.2	ENSDARG00000092185	#N/A	ENSDART00000140614			ENSDARG00000092185.2
CNE14_1_q0.3_peak_58755	chr3	23604131	23604566	+	1633	NA	promoter-TSS (ENSDART00000078423.6)	-promoter-TSS (ENSDART00000078423.6)	48	ENSDART00000078423.6	ENSDARG00000056008	atp5mc1	ENSDART00000078423			ENSDARG00000056008.6
CNE14_1_q0.3_peak_31274	chr18	44173731	44174112	+	1632	NA	Intergenic	Intergenic	20247	ENSDART00000143775.2	ENSDARG00000092178	#N/A	ENSDART00000143775			ENSDARG00000092178.2
CNE14_1_q0.3_peak_45851	chr22	335746	336096	+	1631	NA	promoter-TSS (ENSDART00000019155.7)	-promoter-TSS (ENSDART00000019155.7)	-335	ENSDART00000019155.7	ENSDARG00000020298	btg2	ENSDART00000019155			ENSDARG00000020298.7
CNE14_1_q0.3_peak_52209	chr24	2843017	2843329	+	1630	NA	promoter-TSS (ENSDART00000165290.2)	-promoter-TSS (ENSDART00000165290.2)	-66	ENSDART00000165290.2	ENSDARG00000098589	cyb5a	ENSDART00000165290			ENSDARG00000098589.2
CNE14_1_q0.3_peak_75741	chr7	67733607	67734010	+	1629	NA	promoter-TSS (ENSDART00000172015.2)	-promoter-TSS (ENSDART00000172015.2)	49	ENSDART00000172015.2	ENSDARG00000099774	cyb5b	ENSDART00000172015			ENSDARG00000099774.2
CNE14_1_q0.3_peak_23064	chr16	9580351	9580739	+	1628	NA	promoter-TSS (ENSDART00000165565.2)	-promoter-TSS (ENSDART00000165565.2)	-154	ENSDART00000165565.2	ENSDARG00000102307	taf2	ENSDART00000165565			ENSDARG00000102307.2
CNE14_1_q0.3_peak_2589	chr1	49352615	49353133	+	1626	NA	promoter-TSS (ENSDART00000008468.10)	-promoter-TSS (ENSDART00000008468.10)	-26	ENSDART00000008468.10	ENSDARG00000008886	msx1b	ENSDART00000008468			ENSDARG00000008886.11
CNE14_1_q0.3_peak_69609	chr6	13780487	13780850	+	1626	NA	TTS (ENSDART00000148637.2)	-TTS (ENSDART00000148637.2)	811	ENSDART00000154793.2	ENSDARG00000034685	tmem198b	ENSDART00000043522			ENSDARG00000034685.9
CNE14_1_q0.3_peak_44867	chr21	37733006	37733551	+	1625	NA	promoter-TSS (ENSDART00000157826.2)	-promoter-TSS (ENSDART00000157826.2)	9	ENSDART00000157826.2	ENSDARG00000105287	mpp1	ENSDART00000176214			ENSDARG00000105287.3
CNE14_1_q0.3_peak_82106	chr9	27769594	27840461	+	1624	NA	promoter-TSS (ENSDART00000138476.2)	-promoter-TSS (ENSDART00000138476.2)	-46	ENSDART00000138476.2	ENSDARG00000056907	si.rp71.45g20.10	ENSDART00000144604			ENSDARG00000056907.6
CNE14_1_q0.3_peak_13900	chr13	24402132	24402514	+	1624	NA	promoter-TSS (ENSDART00000043002.6)	-promoter-TSS (ENSDART00000043002.6)	-83	ENSDART00000043002.6	ENSDARG00000029663	rab1ab	ENSDART00000043002			ENSDARG00000029663.7
CNE14_1_q0.3_peak_71050	chr6	47465784	47466125	+	1623	NA	Intergenic	Intergenic	-1956	ENSDART00000116097.2	ENSDARG00000080152	mir29b.1	ENSDART00000116097			ENSDARG00000080152.2
CNE14_1_q0.3_peak_27226	chr17	24866533	24866953	+	1621	NA	promoter-TSS (ENSDART00000027957.8)	-promoter-TSS (ENSDART00000027957.8)	-16	ENSDART00000027957.8	ENSDARG00000021220	hmgcl	ENSDART00000192547			ENSDARG00000021220.9
CNE14_1_q0.3_peak_48370	chr22	37623428	37624357	+	1621	NA	Intergenic	Intergenic	-7142	ENSDART00000193346.1	ENSDARG00000003189	psmd1	ENSDART00000159016			ENSDARG00000003189.11
CNE14_1_q0.3_peak_49897	chr23	10266062	10266394	+	1619	NA	Intergenic	Intergenic	-11940	ENSDART00000081215.5	ENSDARG00000058358	krt8	ENSDART00000137533			ENSDARG00000058358.5
CNE14_1_q0.3_peak_62588	chr4	42264244	42819126	+	1619	NA	Intergenic	Intergenic	-14870	ENSDART00000168536.2	ENSDARG00000098270	znf1053	ENSDART00000168536			ENSDARG00000098270.2
CNE14_1_q0.3_peak_28078	chr17	47051772	47056213	+	1618	NA	Intergenic	Intergenic	36448	ENSDART00000163542.2	ENSDARG00000102288	pcare1	ENSDART00000163542			ENSDARG00000102288.2
CNE14_1_q0.3_peak_77594	chr8	7975532	7975967	+	1618	NA	promoter-TSS (ENSDART00000137920.2)	-promoter-TSS (ENSDART00000137920.2)	4	ENSDART00000137920.2	ENSDARG00000012449	si.ch211.169p10.1	ENSDART00000137920			ENSDARG00000012449.10
CNE14_1_q0.3_peak_74547	chr7	41468604	41469382	+	1616	NA	promoter-TSS (ENSDART00000150146.2)	-promoter-TSS (ENSDART00000150146.2)	-51	ENSDART00000174087.2	ENSDARG00000019969	smarcd3b	ENSDART00000174087			ENSDARG00000019969.12
CNE14_1_q0.3_peak_2810	chr1	53654110	53654731	+	1614	NA	Intergenic	Intergenic	-29278	ENSDART00000166852.2	ENSDARG00000102252	usp34	ENSDART00000166852			ENSDARG00000102252.2
CNE14_1_q0.3_peak_79962	chr8	52997221	52997563	+	1614	NA	intron (ENSDART00000191653.1, intron 2 of 9)	-intron (ENSDART00000191653.1, intron 2 of 9)	-26147	ENSDART00000118297.2	ENSDARG00000080758	mir181a.2	ENSDART00000118297			ENSDARG00000080758.2
CNE14_1_q0.3_peak_65261	chr5	8171346	8171912	+	1612	NA	promoter-TSS (ENSDART00000167643.2)	-promoter-TSS (ENSDART00000167643.2)	-4	ENSDART00000167643.2	ENSDARG00000104431	slc1a3a	ENSDART00000167643			ENSDARG00000104431.2
CNE14_1_q0.3_peak_17229	chr14	21145578	21145978	+	1611	NA	promoter-TSS (ENSDART00000059796.8)	-promoter-TSS (ENSDART00000059796.8)	28	ENSDART00000187440.1	ENSDARG00000019213	zgc.136929	ENSDART00000187440			ENSDARG00000019213.11
CNE14_1_q0.3_peak_42457	chr20	52773943	52775081	+	1608	NA	promoter-TSS (ENSDART00000014606.10)	-promoter-TSS (ENSDART00000014606.10)	-218	ENSDART00000014606.10	ENSDARG00000023916	phactr1	ENSDART00000014606			ENSDARG00000023916.8
CNE14_1_q0.3_peak_35757	chr2	8112281	8113019	+	1607	NA	exon (ENSDART00000138136.2, exon 1 of 1)	-exon (ENSDART00000138136.2, exon 1 of 1)	201	ENSDART00000138136.2	ENSDARG00000075007	chst2a	ENSDART00000138136			ENSDARG00000075007.4
CNE14_1_q0.3_peak_41361	chr20	41020860	41021570	+	1607	NA	exon (ENSDART00000146052.3, exon 1 of 12)	-exon (ENSDART00000146052.3, exon 1 of 12)	161	ENSDART00000146052.3	ENSDARG00000005652	man1a1	ENSDART00000146052			ENSDARG00000005652.10
CNE14_1_q0.3_peak_70639	chr6	37469564	37470234	+	1605	NA	promoter-TSS (ENSDART00000126379.3)	-promoter-TSS (ENSDART00000126379.3)	-124	ENSDART00000156546.3	ENSDARG00000088798	plcxd1	ENSDART00000126379			ENSDARG00000088798.4
CNE14_1_q0.3_peak_62983	chr4	55004669	55165304	+	1604	NA	Intergenic	Intergenic	25461	ENSDART00000128531.3	ENSDARG00000101469	#N/A	ENSDART00000099760			ENSDARG00000101469.2
CNE14_1_q0.3_peak_7606	chr11	12206419	12692228	+	1604	NA	Intergenic	Intergenic	2990	ENSDART00000192041.1	ENSDARG00000111826	zgc.174354	ENSDART00000192041			ENSDARG00000111826.1
CNE14_1_q0.3_peak_44376	chr21	27621135	27621596	+	1603	NA	Intergenic	Intergenic	-1664	ENSDART00000133441.2	ENSDARG00000019501	pcnx3	ENSDART00000180100			ENSDARG00000019501.10
CNE14_1_q0.3_peak_5444	chr10	29849253	29849579	+	1602	NA	promoter-TSS (ENSDART00000099994.5)	-promoter-TSS (ENSDART00000099994.5)	-81	ENSDART00000099994.5	ENSDARG00000068992	hspa8	ENSDART00000132212			ENSDARG00000068992.5
CNE14_1_q0.3_peak_72382	chr6	60124725	60125239	+	1600	NA	promoter-TSS (ENSDART00000008224.5)	-promoter-TSS (ENSDART00000008224.5)	-51	ENSDART00000148557.3	ENSDARG00000012485	aurka	ENSDART00000148557			ENSDARG00000012485.8
CNE14_1_q0.3_peak_74661	chr7	44704699	44705509	+	1596	NA	promoter-TSS (ENSDART00000037850.8)	-promoter-TSS (ENSDART00000037850.8)	-194	ENSDART00000037850.8	ENSDARG00000035924	dync1li2	ENSDART00000037850			ENSDARG00000035924.6
CNE14_1_q0.3_peak_44543	chr21	31252893	31253215	+	1596	NA	promoter-TSS (ENSDART00000040190.7)	-promoter-TSS (ENSDART00000040190.7)	6	ENSDART00000178521.2	ENSDARG00000033361	asl	ENSDART00000040190			ENSDARG00000033361.9
CNE14_1_q0.3_peak_1048	chr1	14514564	14620886	+	1596	NA	intron (ENSDART00000194034.1, intron 1 of 1)	-intron (ENSDART00000194034.1, intron 1 of 1)	-7240	ENSDART00000193804.1	ENSDARG00000109592	#N/A	ENSDART00000193804			ENSDARG00000109592.1
CNE14_1_q0.3_peak_51684	chr23	43870635	43871193	+	1596	NA	promoter-TSS (ENSDART00000102658.5)	-promoter-TSS (ENSDART00000102658.5)	-18	ENSDART00000149088.3	ENSDARG00000070127	nfxl1	ENSDART00000102658			ENSDARG00000070127.6
CNE14_1_q0.3_peak_71248	chr6	52212403	52212883	+	1596	NA	promoter-TSS (ENSDART00000025940.10)	-promoter-TSS (ENSDART00000025940.10)	69	ENSDART00000025940.10	ENSDARG00000013078	ywhaba	ENSDART00000025940			ENSDARG00000013078.10
CNE14_1_q0.3_peak_65703	chr5	16425298	16425951	+	1595	NA	exon (ENSDART00000180617.1, exon 1 of 9)	-exon (ENSDART00000180617.1, exon 1 of 9)	157	ENSDART00000185624.1	ENSDARG00000102387	slc39a14	ENSDART00000185624			ENSDARG00000102387.2
CNE14_1_q0.3_peak_43383	chr21	3854256	3854665	+	1594	NA	promoter-TSS (ENSDART00000122699.3)	-promoter-TSS (ENSDART00000122699.3)	46	ENSDART00000122699.3	ENSDARG00000089357	miga2	ENSDART00000122699			ENSDARG00000089357.3
CNE14_1_q0.3_peak_3398	chr10	187636	188717	+	1592	NA	intron (ENSDART00000160651.1, intron 1 of 4)	-intron (ENSDART00000158247.1, intron 1 of 3)	357	ENSDART00000158247.1	ENSDARG00000103980	ets2	ENSDART00000160651			ENSDARG00000103980.2
CNE14_1_q0.3_peak_13705	chr13	18690852	18691307	+	1592	NA	promoter-TSS (ENSDART00000057867.5)	-promoter-TSS (ENSDART00000057867.5)	-38	ENSDART00000057867.5	ENSDARG00000057374	sfxn3	ENSDART00000057867			ENSDARG00000057374.6
CNE14_1_q0.3_peak_39453	chr20	3318323	3321072	+	1591	NA	promoter-TSS (ENSDART00000123096.5)	-promoter-TSS (ENSDART00000123096.5)	39	ENSDART00000123096.5	ENSDARG00000004049	marcksa	ENSDART00000123096			ENSDARG00000004049.11
CNE14_1_q0.3_peak_45028	chr21	39284564	39285102	+	1591	NA	Intergenic	Intergenic	-7433	ENSDART00000144116.2	ENSDARG00000095185	si.ch211.274p24.2	ENSDART00000144116			ENSDARG00000095185.2
CNE14_1_q0.3_peak_51106	chr23	37085936	37086264	+	1591	NA	promoter-TSS (ENSDART00000031016.9)	-promoter-TSS (ENSDART00000031016.9)	-59	ENSDART00000074407.5	ENSDARG00000052537	cptp	ENSDART00000074407			ENSDARG00000052537.5
CNE14_1_q0.3_peak_78281	chr8	26722861	26723217	+	1591	NA	exon (ENSDART00000139787.3, exon 9 of 15)	-exon (ENSDART00000139787.3, exon 9 of 15)	289	ENSDART00000148033.2	ENSDARG00000076923	kazna	ENSDART00000139787			ENSDARG00000076923.5
CNE14_1_q0.3_peak_74967	chr7	51840971	52102959	+	1589	NA	Intergenic	Intergenic	-18115	ENSDART00000052054.8	ENSDARG00000006501	cyp2x10.2	ENSDART00000142042			ENSDARG00000006501.13
CNE14_1_q0.3_peak_78348	chr8	28386158	28386669	+	1589	NA	Intergenic	Intergenic	14917	ENSDART00000158788.2	ENSDARG00000100631	klhl12	ENSDART00000158788			ENSDARG00000100631.2
CNE14_1_q0.3_peak_65940	chr5	22133006	22133324	+	1586	NA	promoter-TSS (ENSDART00000016214.9)	-promoter-TSS (ENSDART00000016214.9)	12	ENSDART00000016214.9	ENSDARG00000058128	msna	ENSDART00000016214			ENSDARG00000058128.7
CNE14_1_q0.3_peak_20362	chr15	20528260	20528601	+	1586	NA	promoter-TSS (ENSDART00000048423.8)	-promoter-TSS (ENSDART00000048423.8)	64	ENSDART00000048423.8	ENSDARG00000031098	timm50	ENSDART00000048423			ENSDARG00000031098.8
CNE14_1_q0.3_peak_48564	chr22	38516543	38517074	+	1585	NA	exon (ENSDART00000151257.2, exon 1 of 3)	-exon (ENSDART00000151257.2, exon 1 of 3)	114	ENSDART00000151257.2	ENSDARG00000086985	klc4	ENSDART00000151785			ENSDARG00000086985.5
CNE14_1_q0.3_peak_18368	chr14	49133349	49133683	+	1584	NA	promoter-TSS (ENSDART00000042421.9)	-promoter-TSS (ENSDART00000042421.9)	-90	ENSDART00000042421.9	ENSDARG00000030224	ppp2ca	ENSDART00000042421			ENSDARG00000030224.9
CNE14_1_q0.3_peak_845	chr1	8693752	8694370	+	1583	NA	promoter-TSS (ENSDART00000025604.8)	-promoter-TSS (ENSDART00000025604.8)	-135	ENSDART00000025604.8	ENSDARG00000012458	zgc.77849	ENSDART00000152142			ENSDARG00000012458.8
CNE14_1_q0.3_peak_70747	chr6	41095756	41096162	+	1583	NA	promoter-TSS (ENSDART00000028373.5)	-promoter-TSS (ENSDART00000028373.5)	-99	ENSDART00000028373.5	ENSDARG00000028396	fkbp5	ENSDART00000028373			ENSDARG00000028396.5
CNE14_1_q0.3_peak_68474	chr5	71998057	71998476	+	1582	NA	intron (ENSDART00000180574.1, intron 1 of 4)	-intron (ENSDART00000180574.1, intron 1 of 4)	-1730	ENSDART00000187070.1	ENSDARG00000109568	LOC568758	ENSDART00000187070			ENSDARG00000109568.1
CNE14_1_q0.3_peak_56242	chr25	30357122	30357480	+	1582	NA	promoter-TSS (ENSDART00000171137.2)	-promoter-TSS (ENSDART00000171137.2)	-274	ENSDART00000171137.2	ENSDARG00000102640	pdia3	ENSDART00000171137			ENSDARG00000102640.2
CNE14_1_q0.3_peak_80344	chr9	907271	907640	+	1581	NA	promoter-TSS (ENSDART00000034850.8)	-promoter-TSS (ENSDART00000034850.8)	-4	ENSDART00000034850.8	ENSDARG00000026369	dbi	ENSDART00000034850			ENSDARG00000026369.8
CNE14_1_q0.3_peak_16226	chr14	5642216	5642709	+	1579	NA	promoter-TSS (ENSDART00000054876.7)	-promoter-TSS (ENSDART00000054876.7)	-1	ENSDART00000054876.7	ENSDARG00000037675	npm1b	ENSDART00000054876			ENSDARG00000037675.7
CNE14_1_q0.3_peak_64532	chr5	3096985	3659601	+	1577	NA	intron (ENSDART00000194512.1, intron 1 of 3)	-intron (ENSDART00000194512.1, intron 1 of 3)	-15148	ENSDART00000194344.1	ENSDARG00000117282	LOC103911035	ENSDART00000194344			ENSDARG00000117282.1
CNE14_1_q0.3_peak_3223	chr1	58676677	58677047	+	1576	NA	promoter-TSS (ENSDART00000158488.2)	-promoter-TSS (ENSDART00000158488.2)	-572	ENSDART00000158488.2	ENSDARG00000105295	LOC108190731	ENSDART00000158488			ENSDARG00000105295.2
CNE14_1_q0.3_peak_54171	chr24	39226631	39227368	+	1576	NA	promoter-TSS (ENSDART00000168705.2)	-promoter-TSS (ENSDART00000168705.2)	-520	ENSDART00000184611.1	ENSDARG00000105209	si.ch73.103b11.2	ENSDART00000168705			ENSDARG00000105209.2
CNE14_1_q0.3_peak_7909	chr11	18008378	18112998	+	1576	NA	intron (ENSDART00000187376.1, intron 12 of 12)	-intron (ENSDART00000179986.1, intron 5 of 6)	7355	ENSDART00000075750.7	ENSDARG00000105499	zgc.175135	ENSDART00000075750			ENSDARG00000105499.2
CNE14_1_q0.3_peak_65226	chr5	7696381	7696776	+	1572	NA	intron (ENSDART00000168820.2, intron 1 of 13)	-intron (ENSDART00000168820.2, intron 1 of 13)	15582	ENSDART00000168820.2	ENSDARG00000104100	bmpr1ba	ENSDART00000168820			ENSDARG00000104100.3
CNE14_1_q0.3_peak_82318	chr9	34950764	34951252	+	1571	NA	promoter-TSS (ENSDART00000077800.6)	-promoter-TSS (ENSDART00000077800.6)	66	ENSDART00000140851.2	ENSDARG00000019293	tfdp1a	ENSDART00000121828			ENSDARG00000019293.9
CNE14_1_q0.3_peak_57405	chr3	1166856	1167430	+	1571	NA	exon (ENSDART00000031823.10, exon 1 of 12)	-exon (ENSDART00000031823.10, exon 1 of 12)	112	ENSDART00000155340.3	ENSDARG00000006385	triobpb	ENSDART00000155340			ENSDARG00000006385.13
CNE14_1_q0.3_peak_47120	chr22	22301882	22302612	+	1570	NA	promoter-TSS (ENSDART00000049434.7)	-promoter-TSS (ENSDART00000049434.7)	-318	ENSDART00000142027.3	ENSDARG00000062152	chaf1a	ENSDART00000111711			ENSDARG00000062152.7
CNE14_1_q0.3_peak_56979	chr25	35995967	35996381	+	1569	NA	promoter-TSS (ENSDART00000149074.3)	-promoter-TSS (ENSDART00000149074.3)	-33	ENSDART00000149074.3	ENSDARG00000075891	sall1b	ENSDART00000149074			ENSDARG00000075891.6
CNE14_1_q0.3_peak_52861	chr24	17334495	17334805	+	1568	NA	promoter-TSS (ENSDART00000018868.7)	-promoter-TSS (ENSDART00000018868.7)	-28	ENSDART00000126435.4	ENSDARG00000018491	pdia4	ENSDART00000132649			ENSDARG00000018491.10
CNE14_1_q0.3_peak_57909	chr3	7129843	7130177	+	1568	NA	promoter-TSS (ENSDART00000125947.3)	-promoter-TSS (ENSDART00000125947.3)	-953	ENSDART00000125947.3	ENSDARG00000089947	#N/A	ENSDART00000125947			ENSDARG00000089947.3
CNE14_1_q0.3_peak_18152	chr14	45500628	45500957	+	1567	NA	intron (ENSDART00000173172.2, intron 7 of 13)	-intron (ENSDART00000130291.3, intron 6 of 12)	11036	ENSDART00000130291.3	ENSDARG00000087994	si.ch211.114c17.1	ENSDART00000130291			ENSDARG00000087994.4
CNE14_1_q0.3_peak_75006	chr7	53012286	53014359	+	1566	NA	Intergenic	Intergenic	4910	ENSDART00000174022.2	ENSDARG00000104600	#N/A	ENSDART00000174224			ENSDARG00000104600.3
CNE14_1_q0.3_peak_1625	chr1	28388417	28389085	+	1564	NA	Intergenic	Intergenic	-24153	ENSDART00000149632.2	ENSDARG00000095895	#N/A	ENSDART00000149632			ENSDARG00000095895.2
CNE14_1_q0.3_peak_44718	chr21	34657947	34658453	+	1563	NA	promoter-TSS (ENSDART00000023038.8)	-promoter-TSS (ENSDART00000023038.8)	66	ENSDART00000023038.8	ENSDARG00000010132	dacha	ENSDART00000023038			ENSDARG00000010132.9
CNE14_1_q0.3_peak_6422	chr11	497220	498018	+	1562	NA	promoter-TSS (ENSDART00000154888.2)	-promoter-TSS (ENSDART00000154888.2)	61	ENSDART00000154888.2	ENSDARG00000070922	cnbpb	ENSDART00000104520			ENSDARG00000070922.7
CNE14_1_q0.3_peak_17026	chr14	15784142	15784579	+	1561	NA	intron (ENSDART00000158998.2, intron 1 of 9)	-intron (ENSDART00000158998.2, intron 1 of 9)	15418	ENSDART00000158998.2	ENSDARG00000100047	ergic1	ENSDART00000158998			ENSDARG00000100047.2
CNE14_1_q0.3_peak_70303	chr6	27275437	27275775	+	1561	NA	promoter-TSS (ENSDART00000114347.3)	-promoter-TSS (ENSDART00000114347.3)	-110	ENSDART00000156434.3	ENSDARG00000073813	scly	ENSDART00000156434			ENSDARG00000073813.5
CNE14_1_q0.3_peak_75663	chr7	65755849	65756521	+	1561	NA	exon (ENSDART00000156683.2, exon 1 of 2)	-exon (ENSDART00000156683.2, exon 1 of 2)	144	ENSDART00000156683.2	ENSDARG00000097673	#N/A	ENSDART00000156683			ENSDARG00000097673.3
CNE14_1_q0.3_peak_67866	chr5	68092890	68093293	+	1561	NA	promoter-TSS (ENSDART00000051849.4)	-promoter-TSS (ENSDART00000051849.4)	78	ENSDART00000051849.4	ENSDARG00000035741	slc25a11	ENSDART00000158577			ENSDARG00000035741.5
CNE14_1_q0.3_peak_68050	chr5	69135686	69136048	+	1560	NA	Intergenic	Intergenic	11721	ENSDART00000160775.3	ENSDARG00000102513	slc25a45	ENSDART00000160775			ENSDARG00000102513.3
CNE14_1_q0.3_peak_37357	chr2	46280551	46280901	+	1559	NA	Intergenic	Intergenic	-8134	ENSDART00000119716.2	ENSDARG00000084316	#N/A	ENSDART00000119716			ENSDARG00000084316.2
CNE14_1_q0.3_peak_8623	chr11	34823934	34824261	+	1559	NA	promoter-TSS (ENSDART00000037017.9)	-promoter-TSS (ENSDART00000037017.9)	-2	ENSDART00000037017.9	ENSDARG00000027065	slc38a3a	ENSDART00000103157			ENSDARG00000027065.10
CNE14_1_q0.3_peak_57739	chr3	5643350	5644183	+	1559	NA	intron (ENSDART00000019957.10, intron 1 of 9)	-intron (ENSDART00000019957.10, intron 1 of 9)	262	ENSDART00000019957.10	ENSDARG00000015111	ddx39ab	ENSDART00000019957			ENSDARG00000015111.10
CNE14_1_q0.3_peak_84305	chrKN150160.1	1410	8461	+	1559	NA	NA	NA	NA	NA
CNE14_1_q0.3_peak_59460	chr3	45280867	45281326	+	1558	NA	exon (ENSDART00000020168.10, exon 1 of 6)	-exon (ENSDART00000020168.10, exon 1 of 6)	254	ENSDART00000020168.10	ENSDARG00000015722	kctd5a	ENSDART00000020168			ENSDARG00000015722.10
CNE14_1_q0.3_peak_10092	chr12	4631954	4632458	+	1557	NA	exon (ENSDART00000110514.6, exon 1 of 15)	-exon (ENSDART00000110514.6, exon 1 of 15)	313	ENSDART00000110514.6	ENSDARG00000074229	prr12a	ENSDART00000152396			ENSDARG00000074229.6
CNE14_1_q0.3_peak_58216	chr3	11627841	11628619	+	1557	NA	Intergenic	Intergenic	-3536	ENSDART00000127157.3	ENSDARG00000074752	hlfa	ENSDART00000127157			ENSDARG00000074752.5
CNE14_1_q0.3_peak_22977	chr16	8520183	8520633	+	1556	NA	promoter-TSS (ENSDART00000137365.3)	-promoter-TSS (ENSDART00000137365.3)	66	ENSDART00000137365.3	ENSDARG00000035308	grb10b	ENSDART00000146807			ENSDARG00000035308.9
CNE14_1_q0.3_peak_43915	chr21	11885267	11885731	+	1556	NA	promoter-TSS (ENSDART00000092015.5)	-promoter-TSS (ENSDART00000092015.5)	95	ENSDART00000092015.5	ENSDARG00000063155	dcaf12	ENSDART00000092015			ENSDARG00000063155.6
CNE14_1_q0.3_peak_45071	chr21	39566622	39567080	+	1555	NA	promoter-TSS (ENSDART00000020174.5)	-promoter-TSS (ENSDART00000020174.5)	3	ENSDART00000020174.5	ENSDARG00000005172	dynll2b	ENSDART00000020174			ENSDARG00000005172.5
CNE14_1_q0.3_peak_5880	chr10	40283819	40284195	+	1554	NA	promoter-TSS (ENSDART00000062795.4)	-promoter-TSS (ENSDART00000062795.4)	4	ENSDART00000062795.4	ENSDARG00000042791	git2b	ENSDART00000113582			ENSDARG00000042791.8
CNE14_1_q0.3_peak_42913	chr21	944557	944943	+	1554	NA	promoter-TSS (ENSDART00000144766.2)	-promoter-TSS (ENSDART00000144766.2)	35	ENSDART00000144766.2	ENSDARG00000061100	nars1	ENSDART00000144766			ENSDARG00000061100.7
CNE14_1_q0.3_peak_40459	chr20	15552429	15552871	+	1554	NA	promoter-TSS (ENSDART00000063912.5)	-promoter-TSS (ENSDART00000063912.5)	-7	ENSDART00000063912.5	ENSDARG00000043531	jun	ENSDART00000152702			ENSDARG00000043531.6
CNE14_1_q0.3_peak_40670	chr20	20269941	20270537	+	1553	NA	promoter-TSS (ENSDART00000009356.11)	-promoter-TSS (ENSDART00000009356.11)	-48	ENSDART00000009356.11	ENSDARG00000015474	ppp2r5ea	ENSDART00000183234			ENSDARG00000015474.11
CNE14_1_q0.3_peak_67141	chr5	52844478	52844850	+	1552	NA	promoter-TSS (ENSDART00000162459.2)	-promoter-TSS (ENSDART00000162459.2)	-17	ENSDART00000184914.1	ENSDARG00000098312	scarb2a	ENSDART00000162459			ENSDARG00000098312.2
CNE14_1_q0.3_peak_60916	chr3	62139780	62140258	+	1551	NA	promoter-TSS (ENSDART00000108945.4)	-promoter-TSS (ENSDART00000108945.4)	-58	ENSDART00000108945.4	ENSDARG00000079482	gid4	ENSDART00000108945			ENSDARG00000079482.4
CNE14_1_q0.3_peak_41279	chr20	38457929	38458287	+	1551	NA	promoter-TSS (ENSDART00000020153.8)	-promoter-TSS (ENSDART00000020153.8)	24	ENSDART00000135912.3	ENSDARG00000020123	coq8aa	ENSDART00000020153			ENSDARG00000020123.11
CNE14_1_q0.3_peak_59283	chr3	39454920	39455247	+	1550	NA	promoter-TSS (ENSDART00000156123.2)	-promoter-TSS (ENSDART00000156123.2)	-180	ENSDART00000156123.2	ENSDARG00000097747	#N/A	ENSDART00000156123			ENSDARG00000097747.2
CNE14_1_q0.3_peak_27444	chr17	32500137	32500645	+	1546	NA	promoter-TSS (ENSDART00000018423.8)	-promoter-TSS (ENSDART00000018423.8)	4	ENSDART00000018423.8	ENSDARG00000023323	ywhaqb	ENSDART00000018423			ENSDARG00000023323.7
CNE14_1_q0.3_peak_23255	chr16	13680399	13680913	+	1545	NA	promoter-TSS (ENSDART00000047452.7)	-promoter-TSS (ENSDART00000047452.7)	36	ENSDART00000047452.7	ENSDARG00000031775	ube2s	ENSDART00000047452			ENSDARG00000031775.8
CNE14_1_q0.3_peak_33608	chr19	27966938	27967273	+	1543	NA	promoter-TSS (ENSDART00000110016.4)	-promoter-TSS (ENSDART00000110016.4)	-325	ENSDART00000110016.4	ENSDARG00000079276	ube2ql1	ENSDART00000141896			ENSDARG00000079276.5
CNE14_1_q0.3_peak_36291	chr2	19459993	19469530	+	1543	NA	Intergenic	Intergenic	-40502	ENSDART00000142876.3	ENSDARG00000057253	pimr141	ENSDART00000142876			ENSDARG00000057253.7
CNE14_1_q0.3_peak_4225	chr10	4874807	4875230	+	1541	NA	promoter-TSS (ENSDART00000165942.2)	-promoter-TSS (ENSDART00000165942.2)	-244	ENSDART00000165942.2	ENSDARG00000069608	palm2akap2	ENSDART00000101431			ENSDARG00000069608.5
CNE14_1_q0.3_peak_106	chr1	411225	411535	+	1541	NA	promoter-TSS (ENSDART00000092524.6)	-promoter-TSS (ENSDART00000092524.6)	-49	ENSDART00000092524.6	ENSDARG00000063371	rasa3	ENSDART00000092524			ENSDARG00000063371.6
CNE14_1_q0.3_peak_79385	chr8	49974958	49975374	+	1540	NA	promoter-TSS (ENSDART00000080135.6)	-promoter-TSS (ENSDART00000080135.6)	6	ENSDART00000156403.2	ENSDARG00000057465	gfpt1	ENSDART00000156403			ENSDARG00000057465.6
CNE14_1_q0.3_peak_31154	chr18	40697597	40697938	+	1539	NA	TTS (ENSDART00000077577.7)	-TTS (ENSDART00000077577.7)	10757	ENSDART00000139291.2	ENSDARG00000055250	cntd2	ENSDART00000077577			ENSDARG00000055250.8
CNE14_1_q0.3_peak_16411	chr14	9580710	9581271	+	1538	NA	promoter-TSS (ENSDART00000114563.4)	-promoter-TSS (ENSDART00000114563.4)	-906	ENSDART00000114563.4	ENSDARG00000075346	tmem129	ENSDART00000114563			ENSDARG00000075346.4
CNE14_1_q0.3_peak_40993	chr20	29690869	29691191	+	1538	NA	promoter-TSS (ENSDART00000164121.2)	-promoter-TSS (ENSDART00000164121.2)	-88	ENSDART00000164121.2	ENSDARG00000042551	mboat2b	ENSDART00000142669			ENSDARG00000042551.8
CNE14_1_q0.3_peak_74270	chr7	33372577	33373005	+	1537	NA	exon (ENSDART00000099988.5, exon 1 of 5)	-exon (ENSDART00000099988.5, exon 1 of 5)	109	ENSDART00000099988.5	ENSDARG00000068981	glceb	ENSDART00000193436			ENSDARG00000068981.7
CNE14_1_q0.3_peak_17243	chr14	21660240	21660791	+	1536	NA	promoter-TSS (ENSDART00000089845.6)	-promoter-TSS (ENSDART00000089845.6)	33	ENSDART00000089845.6	ENSDARG00000062267	kdm3b	ENSDART00000168323			ENSDARG00000062267.7
CNE14_1_q0.3_peak_7976	chr11	19774518	19775311	+	1535	NA	intron (ENSDART00000037894.10, intron 1 of 10)	-intron (ENSDART00000037894.10, intron 1 of 10)	268	ENSDART00000037894.10	ENSDARG00000027183	namptb	ENSDART00000037894			ENSDARG00000027183.10
CNE14_1_q0.3_peak_57907	chr3	7120232	7120720	+	1533	NA	promoter-TSS (ENSDART00000184911.1)	-promoter-TSS (ENSDART00000184911.1)	-983	ENSDART00000184911.1	ENSDARG00000117076	wu.fb44c10	ENSDART00000184911			ENSDARG00000117076.1
CNE14_1_q0.3_peak_27463	chr17	33288988	33289438	+	1530	NA	promoter-TSS (ENSDART00000135118.3)	-promoter-TSS (ENSDART00000135118.3)	91	ENSDART00000135118.3	ENSDARG00000033516	efr3ba	ENSDART00000040346			ENSDARG00000033516.8
CNE14_1_q0.3_peak_59342	chr3	40925715	40926211	+	1529	NA	intron (ENSDART00000055201.5, intron 2 of 8)	-intron (ENSDART00000055201.5, intron 2 of 8)	7452	ENSDART00000055201.5	ENSDARG00000037872	foxk1	ENSDART00000055201			ENSDARG00000037872.5
CNE14_1_q0.3_peak_42487	chr20	52939269	52939664	+	1529	NA	promoter-TSS (ENSDART00000166508.2)	-promoter-TSS (ENSDART00000166508.2)	35	ENSDART00000166508.2	ENSDARG00000101062	fdft1	ENSDART00000162812			ENSDARG00000101062.2
CNE14_1_q0.3_peak_61743	chr4	21583735	21584189	+	1527	NA	exon (ENSDART00000132923.3, exon 1 of 26)	-exon (ENSDART00000132923.3, exon 1 of 26)	196	ENSDART00000132923.3	ENSDARG00000010784	ppp1r12a	ENSDART00000132923			ENSDARG00000010784.12
CNE14_1_q0.3_peak_69438	chr6	9565081	9565905	+	1527	NA	promoter-TSS (ENSDART00000151470.2)	-promoter-TSS (ENSDART00000151470.2)	33	ENSDART00000151470.2	ENSDARG00000062884	map3k2	ENSDART00000151470			ENSDARG00000062884.7
CNE14_1_q0.3_peak_79678	chr8	51598938	51599379	+	1526	NA	promoter-TSS (ENSDART00000098263.5)	-promoter-TSS (ENSDART00000098263.5)	-6	ENSDART00000134614.2	ENSDARG00000021209	kctd9a	ENSDART00000134614			ENSDARG00000021209.12
CNE14_1_q0.3_peak_53774	chr24	36391884	36392733	+	1525	NA	promoter-TSS (ENSDART00000007381.8)	-promoter-TSS (ENSDART00000007381.8)	-178	ENSDART00000007381.8	ENSDARG00000016393	arf2b	ENSDART00000134750			ENSDARG00000016393.8
CNE14_1_q0.3_peak_47077	chr22	21176033	21176345	+	1525	NA	promoter-TSS (ENSDART00000112839.4)	-promoter-TSS (ENSDART00000112839.4)	-45	ENSDART00000131743.3	ENSDARG00000073867	rex1bd	ENSDART00000131743			ENSDARG00000073867.5
CNE14_1_q0.3_peak_82943	chr9	48936922	48937405	+	1525	NA	promoter-TSS (ENSDART00000075627.7)	-promoter-TSS (ENSDART00000075627.7)	-74	ENSDART00000193442.1	ENSDARG00000053583	cers6	ENSDART00000075627			ENSDARG00000053583.8
CNE14_1_q0.3_peak_680	chr1	5273181	5273594	+	1523	NA	promoter-TSS (ENSDART00000052423.6)	-promoter-TSS (ENSDART00000052423.6)	-94	ENSDART00000052423.6	ENSDARG00000078308	spry2	ENSDART00000052423			ENSDARG00000078308.5
CNE14_1_q0.3_peak_12378	chr13	1099975	1100288	+	1523	NA	promoter-TSS (ENSDART00000139560.3)	-promoter-TSS (ENSDART00000139560.3)	-66	ENSDART00000139560.3	ENSDARG00000092659	ppp3r1a	ENSDART00000139560			ENSDARG00000092659.3
CNE14_1_q0.3_peak_40762	chr20	23226250	23226755	+	1522	NA	promoter-TSS (ENSDART00000142721.3)	-promoter-TSS (ENSDART00000142721.3)	-49	ENSDART00000142721.3	ENSDARG00000092394	dcun1d4	ENSDART00000153308			ENSDARG00000092394.4
CNE14_1_q0.3_peak_61129	chr4	1801347	1801875	+	1517	NA	promoter-TSS (ENSDART00000135749.2)	-promoter-TSS (ENSDART00000135749.2)	8	ENSDART00000135749.2	ENSDARG00000045878	nudt4b	ENSDART00000135749			ENSDARG00000045878.7
CNE14_1_q0.3_peak_3895	chr10	2681700	2682503	+	1517	NA	promoter-TSS (ENSDART00000183727.1)	-promoter-TSS (ENSDART00000183727.1)	97	ENSDART00000183727.1	ENSDARG00000109823	pdxp	ENSDART00000183727			ENSDARG00000109823.1
CNE14_1_q0.3_peak_42677	chr20	54434520	54435516	+	1516	NA	exon (ENSDART00000148632.3, exon 1 of 5)	-exon (ENSDART00000148632.3, exon 1 of 5)	269	ENSDART00000148632.3	ENSDARG00000027978	yy1b	ENSDART00000148632			ENSDARG00000027978.8
CNE14_1_q0.3_peak_56207	chr25	29463511	29463958	+	1516	NA	exon (ENSDART00000124645.3, exon 1 of 13)	-exon (ENSDART00000124645.3, exon 1 of 13)	132	ENSDART00000155676.3	ENSDARG00000013990	ube2q2	ENSDART00000155506			ENSDARG00000013990.13
CNE14_1_q0.3_peak_55523	chr25	12906607	12907005	+	1516	NA	promoter-TSS (ENSDART00000165156.2)	-promoter-TSS (ENSDART00000165156.2)	66	ENSDART00000165156.2	ENSDARG00000102889	15-Sep	ENSDART00000167449			ENSDARG00000102889.3
CNE14_1_q0.3_peak_54840	chr25	2282027	2282529	+	1516	NA	promoter-TSS (ENSDART00000076417.4)	-promoter-TSS (ENSDART00000076417.4)	13	ENSDART00000076417.4	ENSDARG00000054271	cdkn1bb	ENSDART00000076417			ENSDARG00000054271.5
CNE14_1_q0.3_peak_33016	chr19	14157917	14158281	+	1515	NA	promoter-TSS (ENSDART00000168260.2)	-promoter-TSS (ENSDART00000168260.2)	6	ENSDART00000168260.2	ENSDARG00000104837	nudc	ENSDART00000168260			ENSDARG00000104837.2
CNE14_1_q0.3_peak_39364	chr20	2641021	2641457	+	1515	NA	promoter-TSS (ENSDART00000133121.3)	-promoter-TSS (ENSDART00000133121.3)	-6	ENSDART00000145335.2	ENSDARG00000077029	bub1	ENSDART00000133121			ENSDARG00000077029.5
CNE14_1_q0.3_peak_2814	chr1	53756620	53757000	+	1513	NA	promoter-TSS (ENSDART00000122445.3)	-promoter-TSS (ENSDART00000122445.3)	41	ENSDART00000122445.3	ENSDARG00000087205	akt3b	ENSDART00000122445			ENSDARG00000087205.3
CNE14_1_q0.3_peak_69455	chr6	9677204	9677672	+	1513	NA	promoter-TSS (ENSDART00000064995.6)	-promoter-TSS (ENSDART00000064995.6)	18	ENSDART00000064995.6	ENSDARG00000044267	sumo1	ENSDART00000064995			ENSDARG00000044267.6
CNE14_1_q0.3_peak_33579	chr19	26639928	26640423	+	1513	NA	promoter-TSS (ENSDART00000067793.8)	-promoter-TSS (ENSDART00000067793.8)	79	ENSDART00000067793.8	ENSDARG00000016811	ints3	ENSDART00000067793			ENSDARG00000016811.13
CNE14_1_q0.3_peak_10899	chr12	26022532	26022929	+	1510	NA	promoter-TSS (ENSDART00000166769.2)	-promoter-TSS (ENSDART00000166769.2)	-67	ENSDART00000166769.2	ENSDARG00000105045	bmpr1ab	ENSDART00000166769			ENSDARG00000105045.2
CNE14_1_q0.3_peak_51668	chr23	43638610	43639050	+	1509	NA	promoter-TSS (ENSDART00000168646.3)	-promoter-TSS (ENSDART00000168646.3)	-152	ENSDART00000168646.3	ENSDARG00000104508	slc10a7	ENSDART00000168646			ENSDARG00000104508.3
CNE14_1_q0.3_peak_77144	chr8	4030703	4031264	+	1509	NA	promoter-TSS (ENSDART00000159895.2)	-promoter-TSS (ENSDART00000159895.2)	93	ENSDART00000159895.2	ENSDARG00000098201	mtmr3	ENSDART00000159895			ENSDARG00000098201.2
CNE14_1_q0.3_peak_60927	chr3	62239698	62283362	+	1509	NA	Intergenic	Intergenic	-9790	ENSDART00000132197.3	ENSDARG00000102658	zgc.174624	ENSDART00000132197			ENSDARG00000102658.2
CNE14_1_q0.3_peak_81101	chr9	7213516	7213901	+	1508	NA	promoter-TSS (ENSDART00000092435.5)	-promoter-TSS (ENSDART00000092435.5)	64	ENSDART00000174720.2	ENSDARG00000063330	mgat4a	ENSDART00000092435			ENSDARG00000063330.7
CNE14_1_q0.3_peak_50537	chr23	20644365	20644710	+	1507	NA	promoter-TSS (ENSDART00000133131.2)	-promoter-TSS (ENSDART00000133131.2)	26	ENSDART00000133131.2	ENSDARG00000037559	uba1	ENSDART00000136021			ENSDARG00000037559.7
CNE14_1_q0.3_peak_32029	chr18	49966080	49992290	+	1507	NA	intron (ENSDART00000126916.5, intron 1 of 4)	-intron (ENSDART00000126916.5, intron 1 of 4)	9617	ENSDART00000126916.5	ENSDARG00000012005	mob2b	ENSDART00000126916			ENSDARG00000012005.13
CNE14_1_q0.3_peak_15170	chr13	49481511	49482004	+	1507	NA	Intergenic	Intergenic	-37121	ENSDART00000136991.2	ENSDARG00000004702	irf2bp2a	ENSDART00000136991			ENSDARG00000004702.9
CNE14_1_q0.3_peak_14061	chr13	28731884	28732393	+	1507	NA	promoter-TSS (ENSDART00000015773.10)	-promoter-TSS (ENSDART00000015773.10)	37	ENSDART00000015773.10	ENSDARG00000010137	ldb1a	ENSDART00000183338			ENSDARG00000010137.14
CNE14_1_q0.3_peak_398	chr1	2260143	2260654	+	1506	NA	promoter-TSS (ENSDART00000058876.9)	-promoter-TSS (ENSDART00000058876.9)	-9	ENSDART00000058876.9	ENSDARG00000040245	kpnb3	ENSDART00000140507			ENSDARG00000040245.9
CNE14_1_q0.3_peak_46930	chr22	17780948	17781594	+	1504	NA	promoter-TSS (ENSDART00000137984.3)	-promoter-TSS (ENSDART00000137984.3)	-58	ENSDART00000137984.3	ENSDARG00000016188	si.ch73.63e15.2	ENSDART00000192132			ENSDARG00000016188.11
CNE14_1_q0.3_peak_60192	chr3	56946901	56947432	+	1504	NA	Intergenic	Intergenic	-13588	ENSDART00000192185.1	ENSDARG00000021846	hid1a	ENSDART00000192185			ENSDARG00000021846.10
CNE14_1_q0.3_peak_46550	chr22	7025169	7025576	+	1504	NA	promoter-TSS (ENSDART00000003422.7)	-promoter-TSS (ENSDART00000003422.7)	21	ENSDART00000003422.7	ENSDARG00000019004	smarcd1	ENSDART00000142863			ENSDARG00000019004.7
CNE14_1_q0.3_peak_58491	chr3	16265164	16265979	+	1502	NA	promoter-TSS (ENSDART00000122519.3)	-promoter-TSS (ENSDART00000122519.3)	-353	ENSDART00000122519.3	ENSDARG00000021195	st8sia6	ENSDART00000122519			ENSDARG00000021195.9
CNE14_1_q0.3_peak_36385	chr2	21747120	21747557	+	1501	NA	Intergenic	Intergenic	21217	ENSDART00000136876.2	ENSDARG00000075211	chd7	ENSDART00000135230			ENSDARG00000075211.7
CNE14_1_q0.3_peak_71378	chr6	53349751	53350419	+	1496	NA	exon (ENSDART00000167079.2, exon 1 of 5)	-exon (ENSDART00000167079.2, exon 1 of 5)	119	ENSDART00000167079.2	ENSDARG00000100263	si.ch211.161c3.5	ENSDART00000180660			ENSDARG00000100263.2
CNE14_1_q0.3_peak_14056	chr13	28617709	28618141	+	1495	NA	promoter-TSS (ENSDART00000087001.6)	-promoter-TSS (ENSDART00000087001.6)	-161	ENSDART00000087001.6	ENSDARG00000061195	cnnm2a	ENSDART00000087001			ENSDARG00000061195.6
CNE14_1_q0.3_peak_5527	chr10	32646204	32646798	+	1495	NA	promoter-TSS (ENSDART00000137244.2)	-promoter-TSS (ENSDART00000137244.2)	99	ENSDART00000137244.2	ENSDARG00000043285	zbtb21	ENSDART00000137244			ENSDARG00000043285.8
CNE14_1_q0.3_peak_41608	chr20	46572323	46572678	+	1494	NA	promoter-TSS (ENSDART00000139051.4)	-promoter-TSS (ENSDART00000139051.4)	-50	ENSDART00000139051.4	ENSDARG00000011818	batf	ENSDART00000005548			ENSDARG00000011818.8
CNE14_1_q0.3_peak_3893	chr10	2556736	2558095	+	1493	NA	Intergenic	Intergenic	-11378	ENSDART00000191985.1	ENSDARG00000058949	spin1	ENSDART00000191985			ENSDARG00000058949.5
CNE14_1_q0.3_peak_30982	chr18	36733083	36733529	+	1493	NA	Intergenic	Intergenic	-36452	ENSDART00000180375.1	ENSDARG00000055751	fosb	ENSDART00000078151			ENSDARG00000055751.7
CNE14_1_q0.3_peak_14750	chr13	46713170	46713499	+	1493	NA	Intergenic	Intergenic	-5184	ENSDART00000182884.1	ENSDARG00000104559	tmem63ba	ENSDART00000160401			ENSDARG00000104559.2
CNE14_1_q0.3_peak_59562	chr3	48473324	48473830	+	1492	NA	exon (ENSDART00000166294.2, exon 1 of 4)	-exon (ENSDART00000166294.2, exon 1 of 4)	231	ENSDART00000166294.2	ENSDARG00000101914	metrnla	ENSDART00000166294			ENSDARG00000101914.2
CNE14_1_q0.3_peak_56218	chr25	29553094	29553434	+	1491	NA	Intergenic	Intergenic	58212	ENSDART00000154458.2	ENSDARG00000013907	si.ch211.253p14.2	ENSDART00000154458			ENSDARG00000013907.7
CNE14_1_q0.3_peak_75863	chr7	69528697	69529198	+	1491	NA	promoter-TSS (ENSDART00000109507.4)	-promoter-TSS (ENSDART00000109507.4)	97	ENSDART00000109507.4	ENSDARG00000073741	rap1gds1	ENSDART00000109507			ENSDARG00000073741.4
CNE14_1_q0.3_peak_64743	chr5	4435184	4435941	+	1490	NA	promoter-TSS (ENSDART00000167969.2)	-promoter-TSS (ENSDART00000167969.2)	-843	ENSDART00000167969.2	ENSDARG00000098424	LOC563292	ENSDART00000167969			ENSDARG00000098424.2
CNE14_1_q0.3_peak_82181	chr9	30719823	30720151	+	1489	NA	promoter-TSS (ENSDART00000146115.2)	-promoter-TSS (ENSDART00000146115.2)	-61	ENSDART00000146115.2	ENSDARG00000032197	klf12b	ENSDART00000146115			ENSDARG00000032197.7
CNE14_1_q0.3_peak_37264	chr2	43605094	43605974	+	1488	NA	promoter-TSS (ENSDART00000084223.4)	-promoter-TSS (ENSDART00000084223.4)	22	ENSDART00000084223.4	ENSDARG00000060054	epc1b	ENSDART00000084223			ENSDARG00000060054.5
CNE14_1_q0.3_peak_83278	chr9	52612781	52613351	+	1486	NA	promoter-TSS (ENSDART00000164769.2)	-promoter-TSS (ENSDART00000164769.2)	-754	ENSDART00000168753.2	ENSDARG00000101774	#N/A	ENSDART00000166266			ENSDARG00000101774.2
CNE14_1_q0.3_peak_10792	chr12	23371161	23371829	+	1485	NA	promoter-TSS (ENSDART00000078896.6)	-promoter-TSS (ENSDART00000078896.6)	-47	ENSDART00000078896.6	ENSDARG00000012577	waca	ENSDART00000078896			ENSDARG00000012577.9
CNE14_1_q0.3_peak_18276	chr14	48333112	48333504	+	1485	NA	intron (ENSDART00000185822.1, intron 1 of 5)	-intron (ENSDART00000185822.1, intron 1 of 5)	15665	ENSDART00000185822.1	ENSDARG00000115504	#N/A	ENSDART00000185822			ENSDARG00000115504.1
CNE14_1_q0.3_peak_63086	chr4	58165086	58166129	+	1484	NA	Intergenic	Intergenic	-25177	ENSDART00000194376.1	ENSDARG00000117604	LOC103910797	ENSDART00000194376			ENSDARG00000117604.1
CNE14_1_q0.3_peak_34072	chr19	40941353	40941765	+	1483	NA	exon (ENSDART00000142360.4, exon 4 of 4)	-exon (ENSDART00000142360.4, exon 4 of 4)	-16941	ENSDART00000189227.1	ENSDARG00000114312	#N/A	ENSDART00000189227			ENSDARG00000114312.1
CNE14_1_q0.3_peak_45910	chr22	817353	817666	+	1482	NA	promoter-TSS (ENSDART00000122722.3)	-promoter-TSS (ENSDART00000122722.3)	-30	ENSDART00000123487.3	ENSDARG00000071555	zgc.153675	ENSDART00000122722			ENSDARG00000071555.6
CNE14_1_q0.3_peak_55364	chr25	7520688	7521076	+	1482	NA	promoter-TSS (ENSDART00000170050.2)	-promoter-TSS (ENSDART00000170050.2)	55	ENSDART00000170050.2	ENSDARG00000104903	cdkn1cb	ENSDART00000170050			ENSDARG00000104903.2
CNE14_1_q0.3_peak_5404	chr10	28587243	28587630	+	1479	NA	promoter-TSS (ENSDART00000030138.10)	-promoter-TSS (ENSDART00000030138.10)	-10	ENSDART00000030138.10	ENSDARG00000015199	cblb	ENSDART00000137508			ENSDARG00000015199.11
CNE14_1_q0.3_peak_715	chr1	5745769	5746134	+	1479	NA	promoter-TSS (ENSDART00000150863.3)	-promoter-TSS (ENSDART00000150863.3)	79	ENSDART00000150863.3	ENSDARG00000096546	nrp2a	ENSDART00000166779			ENSDARG00000096546.4
CNE14_1_q0.3_peak_79910	chr8	52715779	52716152	+	1479	NA	promoter-TSS (ENSDART00000168241.2)	-promoter-TSS (ENSDART00000168241.2)	-54	ENSDART00000168241.2	ENSDARG00000098591	tubb2b	ENSDART00000168241			ENSDARG00000098591.2
CNE14_1_q0.3_peak_53713	chr24	35387271	35387631	+	1478	NA	promoter-TSS (ENSDART00000058571.7)	-promoter-TSS (ENSDART00000058571.7)	-66	ENSDART00000058571.7	ENSDARG00000040046	snai2	ENSDART00000058571			ENSDARG00000040046.8
CNE14_1_q0.3_peak_65498	chr5	13092605	13092938	+	1475	NA	Intergenic	Intergenic	-6155	ENSDART00000051664.4	ENSDARG00000035630	ypel1	ENSDART00000192826			ENSDARG00000035630.4
CNE14_1_q0.3_peak_55771	chr25	17244417	17245021	+	1473	NA	intron (ENSDART00000171322.2, intron 1 of 20)	-intron (ENSDART00000050379.9, intron 1 of 19)	146	ENSDART00000171322.2	ENSDARG00000018559	kdm7ab	ENSDART00000171322			ENSDARG00000018559.11
CNE14_1_q0.3_peak_81700	chr9	19529774	19530479	+	1473	NA	intron (ENSDART00000125416.7, intron 1 of 10)	-intron (ENSDART00000125416.7, intron 1 of 10)	175	ENSDART00000125416.7	ENSDARG00000018765	pknox1.1	ENSDART00000125416			ENSDARG00000018765.13
CNE14_1_q0.3_peak_55353	chr25	7388456	7388950	+	1473	NA	intron (ENSDART00000154404.3, intron 1 of 4)	-intron (ENSDART00000154404.3, intron 1 of 4)	-9986	ENSDART00000111151.4	ENSDARG00000079756	peak1	ENSDART00000154404			ENSDARG00000079756.5
CNE14_1_q0.3_peak_58561	chr3	17951483	17952094	+	1473	NA	promoter-TSS (ENSDART00000164663.2)	-promoter-TSS (ENSDART00000164663.2)	-2	ENSDART00000164663.2	ENSDARG00000099079	aclya	ENSDART00000165104			ENSDARG00000099079.2
CNE14_1_q0.3_peak_43854	chr21	9562136	9562512	+	1472	NA	promoter-TSS (ENSDART00000162225.2)	-promoter-TSS (ENSDART00000162225.2)	-52	ENSDART00000162225.2	ENSDARG00000103699	ptpn13	ENSDART00000158790			ENSDARG00000103699.3
CNE14_1_q0.3_peak_52634	chr24	12689381	12689751	+	1472	NA	promoter-TSS (ENSDART00000015517.6)	-promoter-TSS (ENSDART00000015517.6)	5	ENSDART00000015517.6	ENSDARG00000005220	pdcd6	ENSDART00000015517			ENSDARG00000005220.6
CNE14_1_q0.3_peak_27439	chr17	32369992	32370340	+	1470	NA	promoter-TSS (ENSDART00000145487.2)	-promoter-TSS (ENSDART00000145487.2)	-119	ENSDART00000145487.2	ENSDARG00000013794	klf11b	ENSDART00000149822			ENSDARG00000013794.10
CNE14_1_q0.3_peak_58417	chr3	14092306	14092634	+	1469	NA	Intergenic	Intergenic	11081	ENSDART00000127604.3	ENSDARG00000087188	nfil3.6	ENSDART00000127604			ENSDARG00000087188.3
CNE14_1_q0.3_peak_12871	chr13	4303383	4303793	+	1469	NA	promoter-TSS (ENSDART00000136262.3)	-promoter-TSS (ENSDART00000136262.3)	53	ENSDART00000136262.3	ENSDARG00000014428	ppp2r5d	ENSDART00000136262			ENSDARG00000014428.11
CNE14_1_q0.3_peak_62012	chr4	28594313	28596906	+	1468	NA	Intergenic	Intergenic	-53474	ENSDART00000178343.2	ENSDARG00000106572	#N/A	ENSDART00000178343			ENSDARG00000106572.2
CNE14_1_q0.3_peak_6321	chr10	44981034	44981426	+	1468	NA	promoter-TSS (ENSDART00000166528.2)	-promoter-TSS (ENSDART00000166528.2)	65	ENSDART00000166528.2	ENSDARG00000103546	purbb	ENSDART00000166528			ENSDARG00000103546.2
CNE14_1_q0.3_peak_70611	chr6	36582023	36582439	+	1468	NA	Intergenic	Intergenic	-29387	ENSDART00000023613.9	ENSDARG00000006514	her6	ENSDART00000135413			ENSDARG00000006514.11
CNE14_1_q0.3_peak_77352	chr8	5190754	5191490	+	1466	NA	Intergenic	Intergenic	29003	ENSDART00000035676.5	ENSDARG00000025468	bnip3la	ENSDART00000035676			ENSDARG00000025468.5
CNE14_1_q0.3_peak_20765	chr15	30157331	30157659	+	1466	NA	promoter-TSS (ENSDART00000047248.7)	-promoter-TSS (ENSDART00000047248.7)	-107	ENSDART00000047248.7	ENSDARG00000028793	nlk2	ENSDART00000190682			ENSDARG00000028793.9
CNE14_1_q0.3_peak_67234	chr5	54500741	54501134	+	1466	NA	promoter-TSS (ENSDART00000165889.2)	-promoter-TSS (ENSDART00000165889.2)	-168	ENSDART00000165889.2	ENSDARG00000101102	tprn	ENSDART00000165889			ENSDARG00000101102.2
CNE14_1_q0.3_peak_29704	chr18	7542849	7543595	+	1466	NA	promoter-TSS (ENSDART00000103467.5)	-promoter-TSS (ENSDART00000103467.5)	-125	ENSDART00000103467.5	ENSDARG00000070472	arf5	ENSDART00000103467			ENSDARG00000070472.6
CNE14_1_q0.3_peak_69458	chr6	9707327	9707809	+	1465	NA	promoter-TSS (ENSDART00000039280.6)	-promoter-TSS (ENSDART00000039280.6)	31	ENSDART00000039280.6	ENSDARG00000027589	fzd7b	ENSDART00000039280			ENSDARG00000027589.8
CNE14_1_q0.3_peak_29983	chr18	15841257	15841967	+	1465	NA	promoter-TSS (ENSDART00000091349.6)	-promoter-TSS (ENSDART00000091349.6)	22	ENSDART00000091349.6	ENSDARG00000062868	eea1	ENSDART00000141800			ENSDARG00000062868.7
CNE14_1_q0.3_peak_8388	chr11	31624961	31625385	+	1463	NA	promoter-TSS (ENSDART00000173083.2)	-promoter-TSS (ENSDART00000173083.2)	2	ENSDART00000173083.2	ENSDARG00000100400	fam126b	ENSDART00000158494			ENSDARG00000100400.3
CNE14_1_q0.3_peak_58010	chr3	7896758	7897412	+	1463	NA	exon (ENSDART00000169757.2, exon 1 of 15)	-exon (ENSDART00000169757.2, exon 1 of 15)	220	ENSDART00000169757.2	ENSDARG00000100508	ubn2b	ENSDART00000169757			ENSDARG00000100508.2
CNE14_1_q0.3_peak_1385	chr1	24557045	24557673	+	1462	NA	promoter-TSS (ENSDART00000076519.5)	-promoter-TSS (ENSDART00000076519.5)	-55	ENSDART00000076519.5	ENSDARG00000054334	dctpp1	ENSDART00000076519			ENSDARG00000054334.5
CNE14_1_q0.3_peak_74323	chr7	34688340	34689297	+	1461	NA	intron (ENSDART00000182728.1, intron 1 of 21)	-intron (ENSDART00000108473.5, intron 1 of 23)	291	ENSDART00000108473.5	ENSDARG00000075964	plekhg4	ENSDART00000182728			ENSDARG00000075964.5
CNE14_1_q0.3_peak_82123	chr9	28398977	28399411	+	1461	NA	promoter-TSS (ENSDART00000064343.5)	-promoter-TSS (ENSDART00000064343.5)	-123	ENSDART00000104317.5	ENSDARG00000043821	klf7b	ENSDART00000104317			ENSDARG00000043821.8
CNE14_1_q0.3_peak_44730	chr21	35215652	35216085	+	1461	NA	promoter-TSS (ENSDART00000135256.2)	-promoter-TSS (ENSDART00000135256.2)	58	ENSDART00000135256.2	ENSDARG00000069184	ubtd2	ENSDART00000135256			ENSDARG00000069184.5
CNE14_1_q0.3_peak_57654	chr3	5067212	5068192	+	1459	NA	promoter-TSS (ENSDART00000169609.2)	-promoter-TSS (ENSDART00000169609.2)	-117	ENSDART00000169609.2	ENSDARG00000098103	tefb	ENSDART00000169609			ENSDARG00000098103.2
CNE14_1_q0.3_peak_21923	chr15	46853383	46853788	+	1458	NA	promoter-TSS (ENSDART00000159844.2)	-promoter-TSS (ENSDART00000159844.2)	80	ENSDART00000159844.2	ENSDARG00000102724	zgc.153039	ENSDART00000186040			ENSDARG00000102724.2
CNE14_1_q0.3_peak_70006	chr6	22337003	22337358	+	1458	NA	promoter-TSS (ENSDART00000128047.3)	-promoter-TSS (ENSDART00000128047.3)	21	ENSDART00000138930.2	ENSDARG00000052304	uqcrc1	ENSDART00000128047			ENSDARG00000052304.7
CNE14_1_q0.3_peak_20509	chr15	23550864	23551221	+	1452	NA	promoter-TSS (ENSDART00000152720.3)	-promoter-TSS (ENSDART00000152720.3)	75	ENSDART00000152720.3	ENSDARG00000024966	si.dkey.31m14.7	ENSDART00000152720			ENSDARG00000024966.11
CNE14_1_q0.3_peak_75242	chr7	56835239	56835592	+	1451	NA	exon (ENSDART00000010322.9, exon 1 of 2)	-exon (ENSDART00000010322.9, exon 1 of 2)	128	ENSDART00000010322.9	ENSDARG00000019595	senp8	ENSDART00000010322			ENSDARG00000019595.9
CNE14_1_q0.3_peak_38761	chr2	58841075	58842106	+	1449	NA	intron (ENSDART00000164102.2, intron 1 of 6)	-intron (ENSDART00000164102.2, intron 1 of 6)	409	ENSDART00000164102.2	ENSDARG00000103672	cirbpa	ENSDART00000164102			ENSDARG00000103672.2
CNE14_1_q0.3_peak_54579	chr25	235622	236167	+	1449	NA	promoter-TSS (ENSDART00000040499.7)	-promoter-TSS (ENSDART00000040499.7)	-98	ENSDART00000123990.4	ENSDARG00000031774	pus7	ENSDART00000040499			ENSDARG00000031774.10
CNE14_1_q0.3_peak_59315	chr3	40407190	40407506	+	1447	NA	promoter-TSS (ENSDART00000155112.3)	-promoter-TSS (ENSDART00000155112.3)	-4	ENSDART00000155112.3	ENSDARG00000077052	tnrc18	ENSDART00000103486			ENSDARG00000077052.6
CNE14_1_q0.3_peak_57278	chr3	240361	241193	+	1447	NA	exon (ENSDART00000167993.2, exon 1 of 3)	-exon (ENSDART00000167993.2, exon 1 of 3)	141	ENSDART00000167993.2	ENSDARG00000088820	zgc.174288	ENSDART00000167993			ENSDARG00000088820.3
CNE14_1_q0.3_peak_82639	chr9	45226912	45227627	+	1445	NA	intron (ENSDART00000139954.2, intron 1 of 1)	-intron (ENSDART00000139954.2, intron 1 of 1)	168	ENSDART00000139954.2	ENSDARG00000092439	#N/A	ENSDART00000139954			ENSDARG00000092439.2
CNE14_1_q0.3_peak_61606	chr4	16544864	16545340	+	1444	NA	promoter-TSS (ENSDART00000033188.5)	-promoter-TSS (ENSDART00000033188.5)	-17	ENSDART00000033188.5	ENSDARG00000027249	btg1	ENSDART00000033188			ENSDARG00000027249.6
CNE14_1_q0.3_peak_78403	chr8	29962356	29962752	+	1444	NA	promoter-TSS (ENSDART00000007640.10)	-promoter-TSS (ENSDART00000007640.10)	-81	ENSDART00000007640.10	ENSDARG00000016404	ptch1	ENSDART00000007640			ENSDARG00000016404.11
CNE14_1_q0.3_peak_15143	chr13	49334657	49335155	+	1444	NA	Intergenic	Intergenic	109730	ENSDART00000136991.2	ENSDARG00000004702	irf2bp2a	ENSDART00000136991			ENSDARG00000004702.9
CNE14_1_q0.3_peak_29728	chr18	8319995	8320748	+	1442	NA	exon (ENSDART00000092053.6, exon 1 of 11)	-exon (ENSDART00000092053.6, exon 1 of 11)	206	ENSDART00000092053.6	ENSDARG00000063167	chkb	ENSDART00000146797			ENSDARG00000063167.6
CNE14_1_q0.3_peak_70700	chr6	39653424	39654026	+	1442	NA	exon (ENSDART00000155859.3, exon 1 of 16)	-exon (ENSDART00000155859.3, exon 1 of 16)	247	ENSDART00000155859.3	ENSDARG00000074979	larp4ab	ENSDART00000155859			ENSDARG00000074979.5
CNE14_1_q0.3_peak_60672	chr3	59981234	59981627	+	1440	NA	promoter-TSS (ENSDART00000035878.7)	-promoter-TSS (ENSDART00000035878.7)	46	ENSDART00000124038.3	ENSDARG00000026834	cdr2l	ENSDART00000035878			ENSDARG00000026834.11
CNE14_1_q0.3_peak_55818	chr25	19188223	19188576	+	1440	NA	exon (ENSDART00000067324.6, exon 10 of 10)	-exon (ENSDART00000067324.6, exon 10 of 10)	5001	ENSDART00000154332.2	ENSDARG00000096875	#N/A	ENSDART00000154332			ENSDARG00000096875.2
CNE14_1_q0.3_peak_42709	chr20	54666028	54666641	+	1439	NA	intron (ENSDART00000166592.2, intron 1 of 7)	-intron (ENSDART00000166592.2, intron 1 of 7)	112	ENSDART00000166592.2	ENSDARG00000102965	LOC100331694	ENSDART00000166592			ENSDARG00000102965.2
CNE14_1_q0.3_peak_17312	chr14	23716999	23717411	+	1438	NA	promoter-TSS (ENSDART00000006373.6)	-promoter-TSS (ENSDART00000006373.6)	40	ENSDART00000006373.6	ENSDARG00000013979	ndfip1	ENSDART00000006373			ENSDARG00000013979.9
CNE14_1_q0.3_peak_68060	chr5	69211578	69212377	+	1438	NA	intron (ENSDART00000053963.7, intron 1 of 7)	-intron (ENSDART00000053963.7, intron 1 of 7)	207	ENSDART00000053963.7	ENSDARG00000037121	mat2ab	ENSDART00000053963			ENSDARG00000037121.7
CNE14_1_q0.3_peak_16110	chr14	4043744	4044713	+	1438	NA	promoter-TSS (ENSDART00000179870.1)	-promoter-TSS (ENSDART00000179870.1)	317	ENSDART00000169527.2	ENSDARG00000099545	snx25	ENSDART00000179870			ENSDARG00000099545.2
CNE14_1_q0.3_peak_43258	chr21	3166231	3166749	+	1436	NA	promoter-TSS (ENSDART00000160585.2)	-promoter-TSS (ENSDART00000160585.2)	-29	ENSDART00000160585.2	ENSDARG00000099865	hnrnpabb	ENSDART00000168163			ENSDARG00000099865.2
CNE14_1_q0.3_peak_47536	chr22	30183779	30184187	+	1436	NA	promoter-TSS (ENSDART00000049075.8)	-promoter-TSS (ENSDART00000049075.8)	-56	ENSDART00000049075.8	ENSDARG00000040874	add3a	ENSDART00000142857			ENSDARG00000040874.9
CNE14_1_q0.3_peak_40054	chr20	7130661	7131317	+	1435	NA	intron (ENSDART00000160910.2, intron 1 of 3)	-intron (ENSDART00000160910.2, intron 1 of 3)	-2276	ENSDART00000036871.7	ENSDARG00000028541	si.ch211.121a2.4	ENSDART00000036871			ENSDARG00000028541.8
CNE14_1_q0.3_peak_57187	chr25	37247929	37249169	+	1435	NA	exon (ENSDART00000087247.6, exon 1 of 28)	-exon (ENSDART00000087247.6, exon 1 of 28)	246	ENSDART00000087247.6	ENSDARG00000061282	glg1a	ENSDART00000156647			ENSDARG00000061282.8
CNE14_1_q0.3_peak_47038	chr22	20341922	20342454	+	1432	NA	promoter-TSS (ENSDART00000161610.2)	-promoter-TSS (ENSDART00000161610.2)	72	ENSDART00000165667.2	ENSDARG00000099999	tcf3b	ENSDART00000161610			ENSDARG00000099999.2
CNE14_1_q0.3_peak_45603	chr21	44581001	44581773	+	1432	NA	promoter-TSS (ENSDART00000180039.1)	-promoter-TSS (ENSDART00000180039.1)	-267	ENSDART00000187201.1	ENSDARG00000113609	tmem164	ENSDART00000186308			ENSDARG00000113609.1
CNE14_1_q0.3_peak_61609	chr4	16644739	16645106	+	1432	NA	promoter-TSS (ENSDART00000042307.7)	-promoter-TSS (ENSDART00000042307.7)	-214	ENSDART00000042307.7	ENSDARG00000032653	sinhcaf	ENSDART00000180605			ENSDARG00000032653.7
CNE14_1_q0.3_peak_23641	chr16	21488983	21489704	+	1431	NA	intron (ENSDART00000148517.2, intron 1 of 5)	-intron (ENSDART00000146914.4, intron 1 of 13)	171	ENSDART00000149525.3	ENSDARG00000056892	mpp6a	ENSDART00000186017			ENSDARG00000056892.9
CNE14_1_q0.3_peak_33563	chr19	26340523	26340847	+	1430	NA	promoter-TSS (ENSDART00000013497.8)	-promoter-TSS (ENSDART00000013497.8)	-51	ENSDART00000013497.8	ENSDARG00000008859	mylipa	ENSDART00000013497			ENSDARG00000008859.8
CNE14_1_q0.3_peak_15975	chr14	2588779	2589128	+	1429	NA	promoter-TSS (ENSDART00000167293.3)	-promoter-TSS (ENSDART00000167293.3)	-737	ENSDART00000188082.1	ENSDARG00000104806	fbxw11a	ENSDART00000167293			ENSDARG00000104806.3
CNE14_1_q0.3_peak_61331	chr4	7677236	7677613	+	1428	NA	exon (ENSDART00000149218.2, exon 1 of 5)	-exon (ENSDART00000149218.2, exon 1 of 5)	106	ENSDART00000149218.2	ENSDARG00000018688	elk3	ENSDART00000009909			ENSDARG00000018688.10
CNE14_1_q0.3_peak_23873	chr16	28820343	28820777	+	1428	NA	exon (ENSDART00000108596.3, exon 5 of 8)	-exon (ENSDART00000108596.3, exon 5 of 8)	-11982	ENSDART00000141071.4	ENSDARG00000076844	plin6	ENSDART00000141071			ENSDARG00000076844.6
CNE14_1_q0.3_peak_37489	chr2	47681184	47681662	+	1427	NA	promoter-TSS (ENSDART00000056882.4)	-promoter-TSS (ENSDART00000056882.4)	31	ENSDART00000056882.4	ENSDARG00000038967	cul3a	ENSDART00000056882			ENSDARG00000038967.4
CNE14_1_q0.3_peak_65856	chr5	20382233	20382636	+	1427	NA	intron (ENSDART00000004217.9, intron 2 of 10)	-intron (ENSDART00000004217.9, intron 2 of 10)	15981	ENSDART00000193141.1	ENSDARG00000035598	coro1ca	ENSDART00000193141			ENSDARG00000035598.6
CNE14_1_q0.3_peak_23856	chr16	28269781	28270253	+	1427	NA	promoter-TSS (ENSDART00000059035.7)	-promoter-TSS (ENSDART00000059035.7)	-20	ENSDART00000059035.7	ENSDARG00000028715	mindy3	ENSDART00000059035			ENSDARG00000028715.8
CNE14_1_q0.3_peak_57901	chr3	6949158	7042663	+	1426	NA	intron (ENSDART00000175293.2, intron 2 of 2)	-intron (ENSDART00000175293.2, intron 2 of 2)	-5698	ENSDART00000127809.4	ENSDARG00000086831	LOC797319	ENSDART00000127809			ENSDARG00000086831.4
CNE14_1_q0.3_peak_16835	chr14	14467715	14468061	+	1426	NA	intron (ENSDART00000180112.1, intron 5 of 6)	-intron (ENSDART00000168320.2, intron 5 of 6)	98529	ENSDART00000159056.2	ENSDARG00000098293	si.dkey.27i16.2	ENSDART00000159056			ENSDARG00000098293.2
CNE14_1_q0.3_peak_36490	chr2	25119812	25120225	+	1426	NA	exon (ENSDART00000132549.4, exon 1 of 15)	-exon (ENSDART00000132549.4, exon 1 of 15)	179	ENSDART00000132549.4	ENSDARG00000038910	pccb	ENSDART00000132549			ENSDARG00000038910.8
CNE14_1_q0.3_peak_54501	chr24	41809072	41809496	+	1425	NA	Intergenic	Intergenic	-11603	ENSDART00000169643.2	ENSDARG00000101350	#N/A	ENSDART00000169643			ENSDARG00000101350.2
CNE14_1_q0.3_peak_82489	chr9	41218498	41218972	+	1424	NA	promoter-TSS (ENSDART00000000280.11)	-promoter-TSS (ENSDART00000000280.11)	-232	ENSDART00000000280.11	ENSDARG00000076182	stat1b	ENSDART00000145312			ENSDARG00000076182.6
CNE14_1_q0.3_peak_59274	chr3	39259278	39259777	+	1423	NA	promoter-TSS (ENSDART00000153986.3)	-promoter-TSS (ENSDART00000153986.3)	97	ENSDART00000155034.3	ENSDARG00000097166	#N/A	ENSDART00000153986			ENSDARG00000097166.3
CNE14_1_q0.3_peak_51703	chr23	44273784	44408718	+	1419	NA	Intergenic	Intergenic	-8001	ENSDART00000097644.5	ENSDARG00000027112	ephb4b	ENSDART00000097644			ENSDARG00000027112.9
CNE14_1_q0.3_peak_26923	chr17	15213180	15213747	+	1416	NA	promoter-TSS (ENSDART00000058351.7)	-promoter-TSS (ENSDART00000058351.7)	-33	ENSDART00000058351.7	ENSDARG00000039892	gnpnat1	ENSDART00000138831			ENSDARG00000039892.7
CNE14_1_q0.3_peak_31100	chr18	39416351	39416854	+	1414	NA	promoter-TSS (ENSDART00000127955.4)	-promoter-TSS (ENSDART00000127955.4)	98	ENSDART00000127955.4	ENSDARG00000091771	lysmd2	ENSDART00000171303			ENSDARG00000091771.4
CNE14_1_q0.3_peak_31465	chr18	46151334	46151734	+	1414	NA	promoter-TSS (ENSDART00000015034.8)	-promoter-TSS (ENSDART00000015034.8)	29	ENSDART00000015034.8	ENSDARG00000096829	blvrb	ENSDART00000133102			ENSDARG00000096829.3
CNE14_1_q0.3_peak_13413	chr13	12784107	12784516	+	1413	NA	Intergenic	Intergenic	-16781	ENSDART00000134725.3	ENSDARG00000062330	si.ch211.233a24.2	ENSDART00000134725			ENSDARG00000062330.7
CNE14_1_q0.3_peak_36938	chr2	38362799	38363247	+	1412	NA	promoter-TSS (ENSDART00000088026.6)	-promoter-TSS (ENSDART00000088026.6)	-6	ENSDART00000088026.6	ENSDARG00000079605	prmt5	ENSDART00000088026			ENSDARG00000079605.4
CNE14_1_q0.3_peak_52790	chr24	16266137	16267307	+	1412	NA	Intergenic	Intergenic	59159	ENSDART00000152018.2	ENSDARG00000096436	#N/A	ENSDART00000151949			ENSDARG00000096436.3
CNE14_1_q0.3_peak_31056	chr18	38191120	38191483	+	1411	NA	promoter-TSS (ENSDART00000052703.6)	-promoter-TSS (ENSDART00000052703.6)	-45	ENSDART00000052703.6	ENSDARG00000036291	nucb2b	ENSDART00000052703			ENSDARG00000036291.6
CNE14_1_q0.3_peak_75901	chr7	69817652	69818162	+	1410	NA	Intergenic	Intergenic	-22419	ENSDART00000162414.2	ENSDARG00000078615	LOC101885715	ENSDART00000162414			ENSDARG00000078615.4
CNE14_1_q0.3_peak_81673	chr9	18735146	18735468	+	1410	NA	promoter-TSS (ENSDART00000143165.3)	-promoter-TSS (ENSDART00000143165.3)	-51	ENSDART00000143165.3	ENSDARG00000038306	tsc22d1	ENSDART00000131626			ENSDARG00000038306.10
CNE14_1_q0.3_peak_24427	chr16	42769889	42770351	+	1409	NA	promoter-TSS (ENSDART00000112879.4)	-promoter-TSS (ENSDART00000112879.4)	-56	ENSDART00000112879.4	ENSDARG00000073952	slc4a7	ENSDART00000176570			ENSDARG00000073952.5
CNE14_1_q0.3_peak_70684	chr6	39198909	39199261	+	1409	NA	promoter-TSS (ENSDART00000077938.5)	-promoter-TSS (ENSDART00000077938.5)	-15	ENSDART00000131793.2	ENSDARG00000055561	c1galt1b	ENSDART00000131793			ENSDARG00000055561.7
CNE14_1_q0.3_peak_37613	chr2	51086458	51087250	+	1407	NA	exon (ENSDART00000167987.2, exon 1 of 7)	-exon (ENSDART00000167987.2, exon 1 of 7)	223	ENSDART00000167987.2	ENSDARG00000098820	ftr67	ENSDART00000167987			ENSDARG00000098820.3
CNE14_1_q0.3_peak_75910	chr7	69905614	69906178	+	1406	NA	intron (ENSDART00000035907.7, intron 1 of 22)	-intron (ENSDART00000035907.7, intron 1 of 22)	589	ENSDART00000035907.7	ENSDARG00000045946	sec24d	ENSDART00000035907			ENSDARG00000045946.6
CNE14_1_q0.3_peak_70683	chr6	39160378	39160710	+	1406	NA	promoter-TSS (ENSDART00000148661.3)	-promoter-TSS (ENSDART00000148661.3)	-122	ENSDART00000148661.3	ENSDARG00000031647	stat2	ENSDART00000148661			ENSDARG00000031647.9
CNE14_1_q0.3_peak_37765	chr2	52549011	52550643	+	1405	NA	exon (ENSDART00000044411.6, exon 1 of 7)	-exon (ENSDART00000044411.6, exon 1 of 7)	308	ENSDART00000044411.6	ENSDARG00000053326	gna11b	ENSDART00000044411			ENSDARG00000053326.7
CNE14_1_q0.3_peak_78469	chr8	31606281	31606754	+	1403	NA	promoter-TSS (ENSDART00000018886.9)	-promoter-TSS (ENSDART00000018886.9)	-3	ENSDART00000018886.9	ENSDARG00000054771	ghra	ENSDART00000018886			ENSDARG00000054771.8
CNE14_1_q0.3_peak_44342	chr21	26482477	26483561	+	1400	NA	exon (ENSDART00000147947.2, exon 1 of 34)	-exon (ENSDART00000147947.2, exon 1 of 34)	218	ENSDART00000169072.2	ENSDARG00000077860	ankhd1	ENSDART00000169072			ENSDARG00000077860.6
CNE14_1_q0.3_peak_8950	chr11	41132204	41132635	+	1399	NA	promoter-TSS (ENSDART00000162944.3)	-promoter-TSS (ENSDART00000162944.3)	-123	ENSDART00000162944.3	ENSDARG00000102696	dnajc11	ENSDART00000173268			ENSDARG00000102696.4
CNE14_1_q0.3_peak_77826	chr8	14157838	14158292	+	1399	NA	promoter-TSS (ENSDART00000080832.4)	-promoter-TSS (ENSDART00000080832.4)	44	ENSDART00000080832.4	ENSDARG00000058032	si.dkey.6n6.2	ENSDART00000080832			ENSDARG00000058032.4
CNE14_1_q0.3_peak_71156	chr6	49925947	49926299	+	1398	NA	promoter-TSS (ENSDART00000018523.9)	-promoter-TSS (ENSDART00000018523.9)	8	ENSDART00000018523.9	ENSDARG00000005191	ahcy	ENSDART00000018523			ENSDARG00000005191.9
CNE14_1_q0.3_peak_84265	chrKN150112.1	1832	2518	+	1397	NA	NA	NA	NA	NA
CNE14_1_q0.3_peak_19267	chr15	2857211	2857767	+	1397	NA	promoter-TSS (ENSDART00000157758.2)	-promoter-TSS (ENSDART00000157758.2)	-67	ENSDART00000157758.2	ENSDARG00000105014	mre11a	ENSDART00000157758			ENSDARG00000105014.3
CNE14_1_q0.3_peak_82664	chr9	46072561	46073125	+	1395	NA	promoter-TSS (ENSDART00000169682.2)	-promoter-TSS (ENSDART00000169682.2)	-38	ENSDART00000169682.2	ENSDARG00000098349	hdac4	ENSDART00000165238			ENSDARG00000098349.3
CNE14_1_q0.3_peak_64816	chr5	4907166	4907770	+	1395	NA	Intergenic	Intergenic	16005	ENSDART00000134585.2	ENSDARG00000045983	zbtb43	ENSDART00000067600			ENSDARG00000045983.5
CNE14_1_q0.3_peak_31004	chr18	37259515	37260292	+	1395	NA	promoter-TSS (ENSDART00000135444.2)	-promoter-TSS (ENSDART00000135444.2)	-67	ENSDART00000135444.2	ENSDARG00000068404	tbcb	ENSDART00000078053			ENSDARG00000068404.4
CNE14_1_q0.3_peak_14657	chr13	45582247	45582625	+	1394	NA	promoter-TSS (ENSDART00000058093.7)	-promoter-TSS (ENSDART00000058093.7)	45	ENSDART00000058093.7	ENSDARG00000039750	ldlrap1b	ENSDART00000058093			ENSDARG00000039750.7
CNE14_1_q0.3_peak_33125	chr19	15568865	15569474	+	1394	NA	Intergenic	Intergenic	-2121	ENSDART00000131134.3	ENSDARG00000024619	foxo6b	ENSDART00000131134			ENSDARG00000024619.7
CNE14_1_q0.3_peak_80891	chr9	4675180	4675606	+	1394	NA	exon (ENSDART00000081326.5, exon 1 of 26)	-exon (ENSDART00000081326.5, exon 1 of 26)	200	ENSDART00000081326.5	ENSDARG00000058467	prpf40a	ENSDART00000081326			ENSDARG00000058467.5
CNE14_1_q0.3_peak_2901	chr1	54737168	54737708	+	1393	NA	promoter-TSS (ENSDART00000130675.4)	-promoter-TSS (ENSDART00000130675.4)	32	ENSDART00000162075.2	ENSDARG00000033666	pi4k2a	ENSDART00000162075			ENSDARG00000033666.8
CNE14_1_q0.3_peak_2269	chr1	40431313	40431646	+	1393	NA	intron (ENSDART00000114659.4, intron 1 of 2)	-intron (ENSDART00000114659.4, intron 1 of 2)	-19535	ENSDART00000144135.3	ENSDARG00000079552	maml3	ENSDART00000114659			ENSDARG00000079552.6
CNE14_1_q0.3_peak_47460	chr22	28020724	28057522	+	1393	NA	Intergenic	Intergenic	40555	ENSDART00000169887.2	ENSDARG00000103860	wu.fu71h07	ENSDART00000169887			ENSDARG00000103860.2
CNE14_1_q0.3_peak_20103	chr15	14769289	14769892	+	1393	NA	Intergenic	Intergenic	11012	ENSDART00000170808.3	ENSDARG00000102669	or129.1	ENSDART00000170808			ENSDARG00000102669.3
CNE14_1_q0.3_peak_84204	chrKN150034.1	1000	1363	+	1393	NA	NA	NA	NA	NA
CNE14_1_q0.3_peak_1559	chr1	27867960	27868625	+	1392	NA	promoter-TSS (ENSDART00000165332.2)	-promoter-TSS (ENSDART00000165332.2)	-2	ENSDART00000165332.2	ENSDARG00000069996	dnajb14	ENSDART00000102337			ENSDARG00000069996.5
CNE14_1_q0.3_peak_8340	chr11	30160772	30161204	+	1392	NA	promoter-TSS (ENSDART00000157385.3)	-promoter-TSS (ENSDART00000157385.3)	-180	ENSDART00000157385.3	ENSDARG00000015240	cdkl5	ENSDART00000190333			ENSDARG00000015240.11
CNE14_1_q0.3_peak_4614	chr10	10877320	10877668	+	1391	NA	Intergenic	Intergenic	-13163	ENSDART00000122657.3	ENSDARG00000091419	nrarpa	ENSDART00000122657			ENSDARG00000091419.3
CNE14_1_q0.3_peak_84697	chrKZ115993.1	1416	1870	+	1391	NA	NA	NA	NA	NA
CNE14_1_q0.3_peak_70645	chr6	37621958	37622365	+	1390	NA	exon (ENSDART00000154363.2, exon 1 of 2)	-exon (ENSDART00000154363.2, exon 1 of 2)	415	ENSDART00000154363.2	ENSDARG00000044341	chst7	ENSDART00000154363			ENSDARG00000044341.8
CNE14_1_q0.3_peak_45232	chr21	41586381	41586887	+	1390	NA	intron (ENSDART00000164125.2, intron 1 of 8)	-intron (ENSDART00000164125.2, intron 1 of 8)	1495	ENSDART00000164125.2	ENSDARG00000105114	crebrf	ENSDART00000164125			ENSDARG00000105114.2
CNE14_1_q0.3_peak_65596	chr5	14390227	14390702	+	1389	NA	promoter-TSS (ENSDART00000026120.8)	-promoter-TSS (ENSDART00000026120.8)	-19	ENSDART00000026120.8	ENSDARG00000016128	ap3m2	ENSDART00000026120			ENSDARG00000016128.8
CNE14_1_q0.3_peak_84198	chrKN150030.1	22140	22796	+	1388	NA	NA	NA	NA	NA
CNE14_1_q0.3_peak_33297	chr19	19512243	19512890	+	1388	NA	promoter-TSS (ENSDART00000180065.1)	-promoter-TSS (ENSDART00000180065.1)	51	ENSDART00000180065.1	ENSDARG00000102551	jazf1a	ENSDART00000180065			ENSDARG00000102551.2
CNE14_1_q0.3_peak_78586	chr8	35044764	35051659	+	1388	NA	Intergenic	Intergenic	15534	ENSDART00000184109.1	ENSDARG00000109589	LOC100007007	ENSDART00000184683			ENSDARG00000109589.1
CNE14_1_q0.3_peak_4984	chr10	16225368	16226399	+	1387	NA	promoter-TSS (ENSDART00000164647.2)	-promoter-TSS (ENSDART00000164647.2)	13	ENSDART00000164647.2	ENSDARG00000104573	slc12a2	ENSDART00000164647			ENSDARG00000104573.3
CNE14_1_q0.3_peak_1677	chr1	28831202	28832020	+	1387	NA	intron (ENSDART00000148536.2, intron 1 of 18)	-intron (ENSDART00000148536.2, intron 1 of 18)	237	ENSDART00000148536.2	ENSDARG00000053456	zgc.172295	ENSDART00000150127			ENSDARG00000053456.7
CNE14_1_q0.3_peak_68573	chr6	119755	120847	+	1386	NA	promoter-TSS (ENSDART00000185930.1)	-promoter-TSS (ENSDART00000185930.1)	-17	ENSDART00000185930.1	ENSDARG00000094176	cdkn2d	ENSDART00000185930			ENSDARG00000094176.4
CNE14_1_q0.3_peak_2054	chr1	34319459	34325414	+	1386	NA	intron (ENSDART00000140157.2, intron 1 of 2)	-intron (ENSDART00000140157.2, intron 1 of 2)	13316	ENSDART00000140157.2	ENSDARG00000094556	#N/A	ENSDART00000140157			ENSDARG00000094556.2
CNE14_1_q0.3_peak_10411	chr12	14466514	14466911	+	1386	NA	Intergenic	Intergenic	84365	ENSDART00000188717.1	ENSDARG00000112601	#N/A	ENSDART00000188717			ENSDARG00000112601.1
CNE14_1_q0.3_peak_6267	chr10	43963874	43964302	+	1386	NA	promoter-TSS (ENSDART00000009134.9)	-promoter-TSS (ENSDART00000009134.9)	-60	ENSDART00000133450.2	ENSDARG00000036031	sept5b	ENSDART00000133450			ENSDARG00000036031.9
CNE14_1_q0.3_peak_33505	chr19	24519527	24519845	+	1385	NA	Intergenic	Intergenic	31283	ENSDART00000052421.4	ENSDARG00000036107	txnipa	ENSDART00000052421			ENSDARG00000036107.4
CNE14_1_q0.3_peak_66782	chr5	45138733	45139438	+	1385	NA	promoter-TSS (ENSDART00000113738.5)	-promoter-TSS (ENSDART00000113738.5)	101	ENSDART00000136002.3	ENSDARG00000008904	smarca2	ENSDART00000136002			ENSDARG00000008904.13
CNE14_1_q0.3_peak_51843	chr23	45820471	45821059	+	1385	NA	intron (ENSDART00000186027.1, intron 3 of 3)	-intron (ENSDART00000186027.1, intron 3 of 3)	-2170	ENSDART00000161892.2	ENSDARG00000099483	#N/A	ENSDART00000161892			ENSDARG00000099483.2
CNE14_1_q0.3_peak_5082	chr10	18912265	18912582	+	1384	NA	intron (ENSDART00000030205.7, intron 1 of 5)	-intron (ENSDART00000030205.7, intron 1 of 5)	1248	ENSDART00000135786.2	ENSDARG00000028067	bnip3lb	ENSDART00000135786			ENSDARG00000028067.7
CNE14_1_q0.3_peak_14778	chr13	46941750	46942062	+	1384	NA	promoter-TSS (ENSDART00000056962.7)	-promoter-TSS (ENSDART00000056962.7)	-24	ENSDART00000056962.7	ENSDARG00000039020	fbxo5	ENSDART00000112924			ENSDARG00000039020.8
CNE14_1_q0.3_peak_70655	chr6	38626502	38626874	+	1383	NA	promoter-TSS (ENSDART00000086533.6)	-promoter-TSS (ENSDART00000086533.6)	4	ENSDART00000086533.6	ENSDARG00000061039	atp10a	ENSDART00000190339			ENSDARG00000061039.6
CNE14_1_q0.3_peak_3519	chr10	641110	641846	+	1381	NA	exon (ENSDART00000041236.8, exon 1 of 17)	-exon (ENSDART00000041236.8, exon 1 of 17)	131	ENSDART00000041236.8	ENSDARG00000014550	rfx3	ENSDART00000171171			ENSDARG00000014550.10
CNE14_1_q0.3_peak_73448	chr7	12081232	12081742	+	1380	NA	Intergenic	Intergenic	-15819	ENSDART00000101537.5	ENSDARG00000058369	mex3b	ENSDART00000101537			ENSDARG00000058369.7
CNE14_1_q0.3_peak_5561	chr10	33150852	33151267	+	1377	NA	intron (ENSDART00000081170.6, intron 1 of 25)	-intron (ENSDART00000081170.6, intron 1 of 25)	5730	ENSDART00000182065.1	ENSDARG00000078459	cux1a	ENSDART00000136245			ENSDARG00000078459.5
CNE14_1_q0.3_peak_59610	chr3	49514364	49515127	+	1376	NA	exon (ENSDART00000167179.2, exon 1 of 4)	-exon (ENSDART00000167179.2, exon 1 of 4)	129	ENSDART00000167179.2	ENSDARG00000101037	asf1ba	ENSDART00000167179			ENSDARG00000101037.2
CNE14_1_q0.3_peak_64014	chr4	75293174	75293672	+	1376	NA	exon (ENSDART00000082522.6, exon 1 of 4)	-exon (ENSDART00000082522.6, exon 1 of 4)	642	ENSDART00000082522.6	ENSDARG00000059409	LOC100537809	ENSDART00000082522			ENSDARG00000059409.6
CNE14_1_q0.3_peak_60926	chr3	62234378	62237061	+	1376	NA	promoter-TSS (ENSDART00000180482.1)	-promoter-TSS (ENSDART00000180482.1)	-724	ENSDART00000180482.1	ENSDARG00000116271	wu.fc31d10	ENSDART00000180482			ENSDARG00000116271.1
CNE14_1_q0.3_peak_59361	chr3	41690097	41690474	+	1374	NA	intron (ENSDART00000184703.1, intron 8 of 20)	-intron (ENSDART00000050332.7, intron 2 of 3)	-24681	ENSDART00000155440.2	ENSDARG00000059654	eif3ba	ENSDART00000155440			ENSDARG00000059654.7
CNE14_1_q0.3_peak_47444	chr22	27146523	27546263	+	1374	NA	intron (ENSDART00000181094.1, intron 2 of 2)	-intron (ENSDART00000181094.1, intron 2 of 2)	16046	ENSDART00000188745.1	ENSDARG00000071143	si.dkey.208m12.2	ENSDART00000181094			ENSDARG00000071143.5
CNE14_1_q0.3_peak_74040	chr7	25920156	25920860	+	1374	NA	promoter-TSS (ENSDART00000026295.9)	-promoter-TSS (ENSDART00000026295.9)	-284	ENSDART00000026295.9	ENSDARG00000011545	arrb2b	ENSDART00000173610			ENSDARG00000011545.9
CNE14_1_q0.3_peak_6317	chr10	44903515	44903917	+	1373	NA	promoter-TSS (ENSDART00000158553.2)	-promoter-TSS (ENSDART00000158553.2)	40	ENSDART00000158553.2	ENSDARG00000101143	zgc.114173	ENSDART00000158553			ENSDARG00000101143.2
CNE14_1_q0.3_peak_17194	chr14	20156323	20156823	+	1373	NA	promoter-TSS (ENSDART00000123434.3)	-promoter-TSS (ENSDART00000123434.3)	96	ENSDART00000123434.3	ENSDARG00000037433	fmr1	ENSDART00000123434			ENSDARG00000037433.7
CNE14_1_q0.3_peak_40416	chr20	14781586	14781958	+	1372	NA	exon (ENSDART00000026969.10, exon 1 of 23)	-exon (ENSDART00000026969.10, exon 1 of 23)	132	ENSDART00000160481.2	ENSDARG00000016532	suco	ENSDART00000026969			ENSDARG00000016532.11
CNE14_1_q0.3_peak_44537	chr21	31013544	31013941	+	1372	NA	promoter-TSS (ENSDART00000065504.5)	-promoter-TSS (ENSDART00000065504.5)	75	ENSDART00000065504.5	ENSDARG00000044597	ncbp3	ENSDART00000065504			ENSDARG00000044597.5
CNE14_1_q0.3_peak_14706	chr13	46429071	46429724	+	1371	NA	promoter-TSS (ENSDART00000080916.6)	-promoter-TSS (ENSDART00000080916.6)	36	ENSDART00000080916.6	ENSDARG00000058115	fgfr2	ENSDART00000150061			ENSDARG00000058115.9
CNE14_1_q0.3_peak_17103	chr14	16813629	16814174	+	1371	NA	promoter-TSS (ENSDART00000159796.2)	-promoter-TSS (ENSDART00000159796.2)	85	ENSDART00000161201.2	ENSDARG00000103774	limch1b	ENSDART00000161201			ENSDARG00000103774.2
CNE14_1_q0.3_peak_73505	chr7	13581984	13582433	+	1370	NA	promoter-TSS (ENSDART00000158477.3)	-promoter-TSS (ENSDART00000158477.3)	-48	ENSDART00000158477.3	ENSDARG00000098647	ankdd1a	ENSDART00000158477			ENSDARG00000098647.4
CNE14_1_q0.3_peak_17255	chr14	21828695	21829500	+	1369	NA	intron (ENSDART00000144367.2, intron 1 of 5)	-intron (ENSDART00000122739.3, intron 3 of 10)	104	ENSDART00000144367.2	ENSDARG00000057007	ctbp1	ENSDART00000144367			ENSDARG00000057007.6
CNE14_1_q0.3_peak_53736	chr24	35707363	35707741	+	1369	NA	promoter-TSS (ENSDART00000165199.2)	-promoter-TSS (ENSDART00000165199.2)	0	ENSDART00000165199.2	ENSDARG00000099943	mapre2	ENSDART00000165199			ENSDARG00000099943.2
CNE14_1_q0.3_peak_7070	chr11	5584412	5584892	+	1367	NA	TTS (ENSDART00000112590.4)	-TTS (ENSDART00000112590.4)	-3470	ENSDART00000113281.4	ENSDARG00000074221	zgc.172302	ENSDART00000113281			ENSDARG00000074221.5
CNE14_1_q0.3_peak_24033	chr16	33105464	33105868	+	1366	NA	promoter-TSS (ENSDART00000138114.2)	-promoter-TSS (ENSDART00000138114.2)	11	ENSDART00000145055.2	ENSDARG00000053291	pnrc2	ENSDART00000151943			ENSDARG00000053291.8
CNE14_1_q0.3_peak_5125	chr10	20481995	20482452	+	1365	NA	promoter-TSS (ENSDART00000091156.6)	-promoter-TSS (ENSDART00000091156.6)	-460	ENSDART00000192358.1	ENSDARG00000073753	tacc1	ENSDART00000192358			ENSDARG00000073753.4
CNE14_1_q0.3_peak_20573	chr15	25179509	25180191	+	1364	NA	intron (ENSDART00000159793.2, intron 3 of 4)	-intron (ENSDART00000159793.2, intron 3 of 4)	18257	ENSDART00000159793.2	ENSDARG00000101859	mnta	ENSDART00000157857			ENSDARG00000101859.2
CNE14_1_q0.3_peak_7511	chr11	10456174	10456528	+	1362	NA	promoter-TSS (ENSDART00000011087.6)	-promoter-TSS (ENSDART00000011087.6)	36	ENSDART00000011087.6	ENSDARG00000007278	ect2	ENSDART00000081827			ENSDARG00000007278.10
CNE14_1_q0.3_peak_39456	chr20	3401729	3402817	+	1362	NA	exon (ENSDART00000092264.6, exon 1 of 32)	-exon (ENSDART00000092264.6, exon 1 of 32)	760	ENSDART00000092264.6	ENSDARG00000058801	rev3l	ENSDART00000092264			ENSDARG00000058801.9
CNE14_1_q0.3_peak_23190	chr16	12173361	12174070	+	1360	NA	promoter-TSS (ENSDART00000110567.6)	-promoter-TSS (ENSDART00000110567.6)	-68	ENSDART00000155935.3	ENSDARG00000073883	clstn3	ENSDART00000142574			ENSDARG00000073883.7
CNE14_1_q0.3_peak_60686	chr3	60087006	60100447	+	1360	NA	intron (ENSDART00000166982.2, intron 7 of 11)	-intron (ENSDART00000166982.2, intron 7 of 11)	46694	ENSDART00000102030.4	ENSDARG00000103341	#N/A	ENSDART00000102030			ENSDARG00000103341.2
CNE14_1_q0.3_peak_19339	chr15	3382598	3382908	+	1360	NA	Intergenic	Intergenic	83262	ENSDART00000169559.2	ENSDARG00000103149	cog6	ENSDART00000158150			ENSDARG00000103149.3
CNE14_1_q0.3_peak_24756	chr16	48678391	48678868	+	1359	NA	promoter-TSS (ENSDART00000150156.3)	-promoter-TSS (ENSDART00000150156.3)	-26	ENSDART00000150156.3	ENSDARG00000079766	tap1	ENSDART00000183957			ENSDARG00000079766.5
CNE14_1_q0.3_peak_3245	chr1	58840616	58841457	+	1358	NA	exon (ENSDART00000098308.4, exon 1 of 5)	-exon (ENSDART00000098308.4, exon 1 of 5)	147	ENSDART00000098308.4	ENSDARG00000017255	tmed1b	ENSDART00000098308			ENSDARG00000017255.9
CNE14_1_q0.3_peak_17635	chr14	32883951	32884272	+	1358	NA	promoter-TSS (ENSDART00000105726.4)	-promoter-TSS (ENSDART00000105726.4)	-23	ENSDART00000140369.2	ENSDARG00000092553	slc25a5	ENSDART00000140369			ENSDARG00000092553.4
CNE14_1_q0.3_peak_23616	chr16	20870905	20871228	+	1356	NA	promoter-TSS (ENSDART00000006429.8)	-promoter-TSS (ENSDART00000006429.8)	22	ENSDART00000132407.2	ENSDARG00000007959	hibadhb	ENSDART00000131452			ENSDARG00000007959.9
CNE14_1_q0.3_peak_54333	chr24	40814127	40814515	+	1356	NA	Intergenic	Intergenic	16173	ENSDART00000161766.2	ENSDARG00000101096	cebp1	ENSDART00000161766			ENSDARG00000101096.3
CNE14_1_q0.3_peak_8516	chr11	32723771	32724178	+	1354	NA	promoter-TSS (ENSDART00000155592.3)	-promoter-TSS (ENSDART00000155592.3)	-123	ENSDART00000155592.3	ENSDARG00000027041	pcdh17	ENSDART00000155592			ENSDARG00000027041.11
CNE14_1_q0.3_peak_64725	chr5	4366262	4366711	+	1353	NA	promoter-TSS (ENSDART00000149185.2)	-promoter-TSS (ENSDART00000149185.2)	40	ENSDART00000149185.2	ENSDARG00000095908	sat1a.2	ENSDART00000168560			ENSDARG00000095908.4
CNE14_1_q0.3_peak_57917	chr3	7161580	7162024	+	1353	NA	intron (ENSDART00000190345.1, intron 1 of 1)	-intron (ENSDART00000190345.1, intron 1 of 1)	-1085	ENSDART00000130027.3	ENSDARG00000103450	#N/A	ENSDART00000130027			ENSDARG00000103450.2
CNE14_1_q0.3_peak_75292	chr7	59165437	59165820	+	1352	NA	promoter-TSS (ENSDART00000170853.2)	-promoter-TSS (ENSDART00000170853.2)	12	ENSDART00000170853.2	ENSDARG00000101652	haus6	ENSDART00000162743			ENSDARG00000101652.2
CNE14_1_q0.3_peak_65503	chr5	13206496	13206988	+	1352	NA	exon (ENSDART00000051666.5, exon 1 of 8)	-exon (ENSDART00000051666.5, exon 1 of 8)	136	ENSDART00000051666.5	ENSDARG00000005786	ppm1f	ENSDART00000051666			ENSDARG00000005786.7
CNE14_1_q0.3_peak_43435	chr21	4251947	4252265	+	1352	NA	Intergenic	Intergenic	-1424	ENSDART00000099389.4	ENSDARG00000068655	dnlz	ENSDART00000099389			ENSDARG00000068655.4
CNE14_1_q0.3_peak_884	chr1	10003280	10003728	+	1351	NA	exon (ENSDART00000162675.2, exon 1 of 12)	-exon (ENSDART00000162675.2, exon 1 of 12)	311	ENSDART00000162675.2	ENSDARG00000076174	trim2b	ENSDART00000162675			ENSDARG00000076174.5
CNE14_1_q0.3_peak_41048	chr20	32152107	32152423	+	1351	NA	promoter-TSS (ENSDART00000139507.2)	-promoter-TSS (ENSDART00000139507.2)	-90	ENSDART00000152904.3	ENSDARG00000020693	sesn1	ENSDART00000147448			ENSDARG00000020693.10
CNE14_1_q0.3_peak_45182	chr21	40938156	40938530	+	1350	NA	promoter-TSS (ENSDART00000008593.7)	-promoter-TSS (ENSDART00000008593.7)	39	ENSDART00000008593.7	ENSDARG00000007279	yipf5	ENSDART00000008593			ENSDARG00000007279.7
CNE14_1_q0.3_peak_77910	chr8	16674110	16674663	+	1350	NA	promoter-TSS (ENSDART00000146774.2)	-promoter-TSS (ENSDART00000146774.2)	198	ENSDART00000100727.6	ENSDARG00000069298	osbpl9	ENSDART00000135319			ENSDARG00000069298.6
CNE14_1_q0.3_peak_75128	chr7	54172623	54255293	+	1349	NA	intron (ENSDART00000157420.2, intron 1 of 3)	-intron (ENSDART00000157420.2, intron 1 of 3)	3573	ENSDART00000157420.2	ENSDARG00000104342	csnk1g1	ENSDART00000165875			ENSDARG00000104342.3
CNE14_1_q0.3_peak_39990	chr20	6589810	6590445	+	1348	NA	promoter-TSS (ENSDART00000136567.3)	-promoter-TSS (ENSDART00000136567.3)	-93	ENSDART00000136567.3	ENSDARG00000031911	si.ch211.191a24.3	ENSDART00000135390			ENSDARG00000031911.7
CNE14_1_q0.3_peak_65859	chr5	20448415	20448786	+	1346	NA	Intergenic	Intergenic	-2518	ENSDART00000051607.4	ENSDARG00000035596	si.ch211.191d15.2	ENSDART00000133307			ENSDARG00000035596.5
CNE14_1_q0.3_peak_36299	chr2	19506891	19611890	+	1343	NA	promoter-TSS (ENSDART00000142642.2)	-promoter-TSS (ENSDART00000142642.2)	-219	ENSDART00000142642.2	ENSDARG00000095391	#N/A	ENSDART00000142642			ENSDARG00000095391.2
CNE14_1_q0.3_peak_2465	chr1	46400940	46401295	+	1343	NA	exon (ENSDART00000149678.2, exon 2 of 2)	-exon (ENSDART00000149678.2, exon 2 of 2)	268	ENSDART00000150029.3	ENSDARG00000008413	atp11a	ENSDART00000145117			ENSDARG00000008413.12
CNE14_1_q0.3_peak_44477	chr21	28728068	28728890	+	1342	NA	exon (ENSDART00000097307.4, exon 1 of 1)	-exon (ENSDART00000097307.4, exon 1 of 1)	449	ENSDART00000097307.4	ENSDARG00000067591	puraa	ENSDART00000097307			ENSDARG00000067591.5
CNE14_1_q0.3_peak_82219	chr9	32357784	32358105	+	1341	NA	promoter-TSS (ENSDART00000144608.3)	-promoter-TSS (ENSDART00000144608.3)	-570	ENSDART00000144608.3	ENSDARG00000067676	plcl1	ENSDART00000187650			ENSDARG00000067676.7
CNE14_1_q0.3_peak_67576	chr5	61831358	61837796	+	1341	NA	Intergenic	Intergenic	-5130	ENSDART00000163051.2	ENSDARG00000088069	LOC572297	ENSDART00000130940			ENSDARG00000088069.3
CNE14_1_q0.3_peak_854	chr1	8977710	8978098	+	1341	NA	promoter-TSS (ENSDART00000133496.2)	-promoter-TSS (ENSDART00000133496.2)	59	ENSDART00000133496.2	ENSDARG00000093438	si.ch73.191k20.4	ENSDART00000133496			ENSDARG00000093438.2
CNE14_1_q0.3_peak_70093	chr6	23122563	23122887	+	1341	NA	promoter-TSS (ENSDART00000049226.8)	-promoter-TSS (ENSDART00000049226.8)	-64	ENSDART00000049226.8	ENSDARG00000014727	acox1	ENSDART00000067560			ENSDARG00000014727.10
CNE14_1_q0.3_peak_61839	chr4	25912308	25912869	+	1340	NA	promoter-TSS (ENSDART00000109508.4)	-promoter-TSS (ENSDART00000109508.4)	-66	ENSDART00000109508.4	ENSDARG00000075215	vezt	ENSDART00000134218			ENSDARG00000075215.6
CNE14_1_q0.3_peak_52350	chr24	7957365	7957704	+	1340	NA	promoter-TSS (ENSDART00000145815.2)	-promoter-TSS (ENSDART00000145815.2)	47	ENSDART00000145815.2	ENSDARG00000009342	txndc5	ENSDART00000145815			ENSDARG00000009342.10
CNE14_1_q0.3_peak_6596	chr11	1968434	1968743	+	1340	NA	Intergenic	Intergenic	-1150	ENSDART00000155844.3	ENSDARG00000059370	nr1d4b	ENSDART00000185541			ENSDARG00000059370.8
CNE14_1_q0.3_peak_8372	chr11	31116364	31177460	+	1338	NA	promoter-TSS (ENSDART00000172781.2)	-promoter-TSS (ENSDART00000172781.2)	-104	ENSDART00000172781.2	ENSDARG00000105349	#N/A	ENSDART00000172781			ENSDARG00000105349.2
CNE14_1_q0.3_peak_72161	chr6	58915191	58916017	+	1337	NA	promoter-TSS (ENSDART00000083628.5)	-promoter-TSS (ENSDART00000083628.5)	-285	ENSDART00000083628.5	ENSDARG00000059836	ddit3	ENSDART00000083628			ENSDARG00000059836.6
CNE14_1_q0.3_peak_41504	chr20	44460565	44461096	+	1337	NA	promoter-TSS (ENSDART00000085442.5)	-promoter-TSS (ENSDART00000085442.5)	-41	ENSDART00000085442.5	ENSDARG00000060554	mut	ENSDART00000085442			ENSDARG00000060554.6
CNE14_1_q0.3_peak_1218	chr1	19094177	19095242	+	1337	NA	intron (ENSDART00000114514.4, intron 1 of 12)	-intron (ENSDART00000114514.4, intron 1 of 12)	161	ENSDART00000114514.4	ENSDARG00000073902	ptpn9b	ENSDART00000114514			ENSDARG00000073902.4
CNE14_1_q0.3_peak_77662	chr8	10131389	10131782	+	1335	NA	Intergenic	Intergenic	63313	ENSDART00000168739.2	ENSDARG00000098300	#N/A	ENSDART00000168739			ENSDARG00000098300.2
CNE14_1_q0.3_peak_72980	chr7	7551902	7552290	+	1335	NA	promoter-TSS (ENSDART00000049311.7)	-promoter-TSS (ENSDART00000049311.7)	-9	ENSDART00000049311.7	ENSDARG00000003269	clcn3	ENSDART00000172934			ENSDARG00000003269.13
CNE14_1_q0.3_peak_60024	chr3	55358796	55359911	+	1335	NA	Intergenic	Intergenic	-30805	ENSDART00000082944.6	ENSDARG00000035706	dock6	ENSDART00000154168			ENSDARG00000035706.7
CNE14_1_q0.3_peak_61529	chr4	13568286	13568675	+	1334	NA	promoter-TSS (ENSDART00000102010.6)	-promoter-TSS (ENSDART00000102010.6)	11	ENSDART00000171235.3	ENSDARG00000045676	calua	ENSDART00000136152			ENSDARG00000045676.7
CNE14_1_q0.3_peak_46939	chr22	18240954	18241585	+	1334	NA	promoter-TSS (ENSDART00000027605.10)	-promoter-TSS (ENSDART00000027605.10)	121	ENSDART00000083879.6	ENSDARG00000012790	tmem161a	ENSDART00000083879			ENSDARG00000012790.11
CNE14_1_q0.3_peak_21365	chr15	42397024	42397417	+	1333	NA	promoter-TSS (ENSDART00000169751.2)	-promoter-TSS (ENSDART00000169751.2)	95	ENSDART00000169751.2	ENSDARG00000025920	tiam1b	ENSDART00000189951			ENSDARG00000025920.9
CNE14_1_q0.3_peak_33137	chr19	15806319	15806723	+	1333	NA	Intergenic	Intergenic	48906	ENSDART00000133059.3	ENSDARG00000035990	cited4a	ENSDART00000133059			ENSDARG00000035990.6
CNE14_1_q0.3_peak_32344	chr19	1363175	1363860	+	1332	NA	exon (ENSDART00000166088.2, exon 1 of 8)	-exon (ENSDART00000166088.2, exon 1 of 8)	242	ENSDART00000166088.2	ENSDARG00000099753	zgc.63863	ENSDART00000166088			ENSDARG00000099753.2
CNE14_1_q0.3_peak_42292	chr20	51315173	51387161	+	1332	NA	intron (ENSDART00000151690.3, intron 3 of 4)	-intron (ENSDART00000110289.4, intron 3 of 4)	4298	ENSDART00000151620.2	ENSDARG00000077387	tcte1	ENSDART00000151620			ENSDARG00000077387.6
CNE14_1_q0.3_peak_27917	chr17	42894904	42930808	+	1332	NA	Intergenic	Intergenic	-69993	ENSDART00000144258.2	ENSDARG00000008239	mocs3	ENSDART00000144258			ENSDARG00000008239.11
CNE14_1_q0.3_peak_70685	chr6	39218387	39218862	+	1332	NA	promoter-TSS (ENSDART00000041882.9)	-promoter-TSS (ENSDART00000041882.9)	-15	ENSDART00000133305.3	ENSDARG00000020301	os9	ENSDART00000041882			ENSDARG00000020301.12
CNE14_1_q0.3_peak_49357	chr23	4347899	4348513	+	1331	NA	promoter-TSS (ENSDART00000136287.2)	-promoter-TSS (ENSDART00000136287.2)	-59	ENSDART00000136287.2	ENSDARG00000095241	mybl2a	ENSDART00000190593			ENSDARG00000095241.3
CNE14_1_q0.3_peak_28795	chr17	51878366	51878777	+	1330	NA	intron (ENSDART00000103350.5, intron 1 of 10)	-intron (ENSDART00000017329.8, intron 1 of 9)	14552	ENSDART00000103350.5	ENSDARG00000027279	numb	ENSDART00000017329			ENSDARG00000027279.9
CNE14_1_q0.3_peak_57677	chr3	5240906	5241278	+	1330	NA	Intergenic	Intergenic	-12251	ENSDART00000092373.7	ENSDARG00000001014	myh9b	ENSDART00000182438			ENSDARG00000001014.14
CNE14_1_q0.3_peak_49770	chr23	7650755	7651331	+	1330	NA	intron (ENSDART00000180524.1, intron 1 of 2)	-intron (ENSDART00000180524.1, intron 1 of 2)	23859	ENSDART00000185612.1	ENSDARG00000076657	plagl2	ENSDART00000185612			ENSDARG00000076657.5
CNE14_1_q0.3_peak_61232	chr4	4751931	4752371	+	1330	NA	promoter-TSS (ENSDART00000092984.5)	-promoter-TSS (ENSDART00000092984.5)	-168	ENSDART00000158466.2	ENSDARG00000063563	creb3l2	ENSDART00000092984			ENSDARG00000063563.8
CNE14_1_q0.3_peak_55563	chr25	13658920	13659360	+	1329	NA	exon (ENSDART00000045488.7, exon 1 of 12)	-exon (ENSDART00000045488.7, exon 1 of 12)	109	ENSDART00000045488.7	ENSDARG00000013582	csnk2a2b	ENSDART00000045488			ENSDARG00000013582.9
CNE14_1_q0.3_peak_30616	chr18	31117139	31117465	+	1329	NA	promoter-TSS (ENSDART00000059893.7)	-promoter-TSS (ENSDART00000059893.7)	-21	ENSDART00000059893.7	ENSDARG00000040861	tcf25	ENSDART00000059893			ENSDARG00000040861.8
CNE14_1_q0.3_peak_73525	chr7	13824002	13824454	+	1328	NA	promoter-TSS (ENSDART00000035067.8)	-promoter-TSS (ENSDART00000035067.8)	78	ENSDART00000035067.8	ENSDARG00000025797	abhd2a	ENSDART00000191360			ENSDARG00000025797.8
CNE14_1_q0.3_peak_41217	chr20	37794404	37794775	+	1328	NA	promoter-TSS (ENSDART00000022060.8)	-promoter-TSS (ENSDART00000022060.8)	-44	ENSDART00000022060.8	ENSDARG00000007823	atf3	ENSDART00000022060			ENSDARG00000007823.10
CNE14_1_q0.3_peak_79064	chr8	45759797	45760286	+	1328	NA	promoter-TSS (ENSDART00000025620.8)	-promoter-TSS (ENSDART00000025620.8)	42	ENSDART00000137036.2	ENSDARG00000009212	ppiaa	ENSDART00000179658			ENSDARG00000009212.8
CNE14_1_q0.3_peak_16948	chr14	15155358	15155876	+	1326	NA	promoter-TSS (ENSDART00000160677.2)	-promoter-TSS (ENSDART00000160677.2)	-67	ENSDART00000167966.2	ENSDARG00000102076	spink2.1	ENSDART00000167966			ENSDARG00000102076.2
CNE14_1_q0.3_peak_60097	chr3	56035648	56036105	+	1324	NA	Intergenic	Intergenic	-5759	ENSDART00000113030.5	ENSDARG00000079679	cep112	ENSDART00000157764			ENSDARG00000079679.5
CNE14_1_q0.3_peak_7029	chr11	5413274	5413608	+	1324	NA	intron (ENSDART00000092552.6, intron 14 of 29)	-intron (ENSDART00000092552.6, intron 14 of 29)	-55188	ENSDART00000013203.9	ENSDARG00000006963	cse1l	ENSDART00000013203			ENSDARG00000006963.9
CNE14_1_q0.3_peak_57915	chr3	7147992	7148571	+	1324	NA	intron (ENSDART00000130027.3, intron 1 of 1)	-intron (ENSDART00000130027.3, intron 1 of 1)	-1055	ENSDART00000178155.2	ENSDARG00000114108	#N/A	ENSDART00000178155			ENSDARG00000114108.1
CNE14_1_q0.3_peak_70648	chr6	37752633	37753133	+	1323	NA	intron (ENSDART00000154364.2, intron 1 of 16)	-intron (ENSDART00000154364.2, intron 1 of 16)	102	ENSDART00000154364.2	ENSDARG00000073841	herc2	ENSDART00000110770			ENSDARG00000073841.5
CNE14_1_q0.3_peak_40922	chr20	26947631	26948109	+	1322	NA	promoter-TSS (ENSDART00000062066.5)	-promoter-TSS (ENSDART00000062066.5)	70	ENSDART00000062066.5	ENSDARG00000042322	si.dkey.177p2.6	ENSDART00000062066			ENSDARG00000042322.6
CNE14_1_q0.3_peak_74487	chr7	38961977	38962620	+	1321	NA	promoter-TSS (ENSDART00000173565.2)	-promoter-TSS (ENSDART00000173565.2)	91	ENSDART00000173565.2	ENSDARG00000014439	dgkza	ENSDART00000173851			ENSDARG00000014439.12
CNE14_1_q0.3_peak_55462	chr25	10458852	10459204	+	1321	NA	promoter-TSS (ENSDART00000044738.7)	-promoter-TSS (ENSDART00000044738.7)	3	ENSDART00000044738.7	ENSDARG00000007247	ric8a	ENSDART00000044738			ENSDARG00000007247.12
CNE14_1_q0.3_peak_79860	chr8	52314415	52314830	+	1321	NA	promoter-TSS (ENSDART00000013059.9)	-promoter-TSS (ENSDART00000013059.9)	45	ENSDART00000125241.4	ENSDARG00000016016	dbnlb	ENSDART00000125241			ENSDARG00000016016.12
CNE14_1_q0.3_peak_40581	chr20	18535890	18536287	+	1320	NA	promoter-TSS (ENSDART00000049437.6)	-promoter-TSS (ENSDART00000049437.6)	386	ENSDART00000190903.1	ENSDARG00000019383	cdc42bpb	ENSDART00000049437			ENSDARG00000019383.9
CNE14_1_q0.3_peak_66661	chr5	42011076	42011502	+	1318	NA	intron (ENSDART00000097580.5, intron 2 of 6)	-intron (ENSDART00000097580.5, intron 2 of 6)	14400	ENSDART00000097580.5	ENSDARG00000067752	pigl	ENSDART00000097580			ENSDARG00000067752.5
CNE14_1_q0.3_peak_70795	chr6	42948796	42949487	+	1318	NA	promoter-TSS (ENSDART00000147208.3)	-promoter-TSS (ENSDART00000147208.3)	43	ENSDART00000147208.3	ENSDARG00000025094	edem1	ENSDART00000147208			ENSDARG00000025094.11
CNE14_1_q0.3_peak_16408	chr14	9512151	9512568	+	1316	NA	intron (ENSDART00000186416.1, intron 2 of 7)	-intron (ENSDART00000054689.5, intron 2 of 2)	10005	ENSDART00000054689.5	ENSDARG00000037555	atoh8	ENSDART00000054689			ENSDARG00000037555.7
CNE14_1_q0.3_peak_39420	chr20	2949846	2951280	+	1316	NA	intron (ENSDART00000135919.2, intron 1 of 8)	-intron (ENSDART00000135919.2, intron 1 of 8)	558	ENSDART00000135919.2	ENSDARG00000043856	amd1	ENSDART00000152245			ENSDARG00000043856.8
CNE14_1_q0.3_peak_78062	chr8	20230108	20230871	+	1315	NA	promoter-TSS (ENSDART00000193677.1)	-promoter-TSS (ENSDART00000193677.1)	70	ENSDART00000193677.1	ENSDARG00000043185	mllt1a	ENSDART00000063400			ENSDARG00000043185.8
CNE14_1_q0.3_peak_23435	chr16	16977659	16978207	+	1315	NA	promoter-TSS (ENSDART00000143128.2)	-promoter-TSS (ENSDART00000143128.2)	129	ENSDART00000132150.3	ENSDARG00000029533	rpl18	ENSDART00000143128			ENSDARG00000029533.8
CNE14_1_q0.3_peak_82671	chr9	46196987	46197325	+	1314	NA	intron (ENSDART00000165238.3, intron 2 of 26)	-intron (ENSDART00000165238.3, intron 2 of 26)	79470	ENSDART00000165238.3	ENSDARG00000098349	hdac4	ENSDART00000165238			ENSDARG00000098349.3
CNE14_1_q0.3_peak_51699	chr23	44236084	44236898	+	1314	NA	promoter-TSS (ENSDART00000051907.7)	-promoter-TSS (ENSDART00000051907.7)	210	ENSDART00000149842.3	ENSDARG00000035771	si.ch1073.157b13.1	ENSDART00000130147			ENSDARG00000035771.9
CNE14_1_q0.3_peak_62515	chr4	39733297	39734459	+	1314	NA	Intergenic	Intergenic	-8241	ENSDART00000176004.2	ENSDARG00000108525	#N/A	ENSDART00000176004			ENSDARG00000108525.2
CNE14_1_q0.3_peak_37090	chr2	42214141	42214498	+	1314	NA	intron (ENSDART00000147019.2, intron 1 of 9)	-intron (ENSDART00000147019.2, intron 1 of 9)	1371	ENSDART00000147019.2	ENSDARG00000079784	si.ch211.235o23.1	ENSDART00000147019			ENSDARG00000079784.5
CNE14_1_q0.3_peak_15050	chr13	48482317	48482909	+	1313	NA	intron (ENSDART00000053332.8, intron 1 of 4)	-intron (ENSDART00000053332.8, intron 1 of 4)	357	ENSDART00000053332.8	ENSDARG00000055574	foxn2a	ENSDART00000053332			ENSDARG00000055574.6
CNE14_1_q0.3_peak_13601	chr13	16342281	16343159	+	1312	NA	promoter-TSS (ENSDART00000105496.5)	-promoter-TSS (ENSDART00000105496.5)	-206	ENSDART00000124710.4	ENSDARG00000074059	dlg5a	ENSDART00000105496			ENSDARG00000074059.6
CNE14_1_q0.3_peak_11082	chr12	32066415	32066779	+	1312	NA	promoter-TSS (ENSDART00000062185.6)	-promoter-TSS (ENSDART00000062185.6)	-127	ENSDART00000062185.6	ENSDARG00000042410	rab40b	ENSDART00000062185			ENSDARG00000042410.6
CNE14_1_q0.3_peak_59080	chr3	33259165	33259729	+	1312	NA	exon (ENSDART00000151070.2, exon 1 of 4)	-exon (ENSDART00000151070.2, exon 1 of 4)	174	ENSDART00000151070.2	ENSDARG00000034893	rarab	ENSDART00000044677			ENSDARG00000034893.9
CNE14_1_q0.3_peak_73365	chr7	11034439	11034845	+	1311	NA	Intergenic	Intergenic	-13742	ENSDART00000182976.1	ENSDARG00000114931	#N/A	ENSDART00000182976			ENSDARG00000114931.1
CNE14_1_q0.3_peak_23920	chr16	30420779	30421361	+	1311	NA	promoter-TSS (ENSDART00000134538.3)	-promoter-TSS (ENSDART00000134538.3)	-52	ENSDART00000147289.3	ENSDARG00000016173	cct3	ENSDART00000003752			ENSDARG00000016173.9
CNE14_1_q0.3_peak_81137	chr9	7884479	7884928	+	1310	NA	Intergenic	Intergenic	-24787	ENSDART00000109288.4	ENSDARG00000078582	myo16	ENSDART00000133063			ENSDARG00000078582.5
CNE14_1_q0.3_peak_22755	chr16	5105068	5105509	+	1310	NA	promoter-TSS (ENSDART00000082071.6)	-promoter-TSS (ENSDART00000082071.6)	7	ENSDART00000082071.6	ENSDARG00000014676	bckdhb	ENSDART00000082071			ENSDARG00000014676.11
CNE14_1_q0.3_peak_42745	chr20	55032098	55032882	+	1309	NA	Intergenic	Intergenic	-33893	ENSDART00000153123.2	ENSDARG00000096690	#N/A	ENSDART00000153123			ENSDARG00000096690.2
CNE14_1_q0.3_peak_24615	chr16	46410304	46410694	+	1307	NA	promoter-TSS (ENSDART00000131072.2)	-promoter-TSS (ENSDART00000131072.2)	-21	ENSDART00000131072.2	ENSDARG00000091215	rpz2	ENSDART00000144000			ENSDARG00000091215.3
CNE14_1_q0.3_peak_44926	chr21	38284882	38285338	+	1307	NA	Intergenic	Intergenic	-27439	ENSDART00000065159.5	ENSDARG00000044375	zgc.158291	ENSDART00000065159			ENSDARG00000044375.5
CNE14_1_q0.3_peak_562	chr1	4101226	4101685	+	1307	NA	promoter-TSS (ENSDART00000163793.2)	-promoter-TSS (ENSDART00000163793.2)	-286	ENSDART00000163793.2	ENSDARG00000098769	slitrk6	ENSDART00000163793			ENSDARG00000098769.2
CNE14_1_q0.3_peak_83959	chrKN149692.1	164	7542	+	1307	NA	NA	NA	NA	NA
CNE14_1_q0.3_peak_67228	chr5	54300388	54301102	+	1307	NA	promoter-TSS (ENSDART00000163048.2)	-promoter-TSS (ENSDART00000163048.2)	-20	ENSDART00000163048.2	ENSDARG00000102783	slc25a35	ENSDART00000163048			ENSDARG00000102783.2
CNE14_1_q0.3_peak_25811	chr17	2126487	2127043	+	1305	NA	promoter-TSS (ENSDART00000013093.8)	-promoter-TSS (ENSDART00000013093.8)	-248	ENSDART00000013093.8	ENSDARG00000003642	zfyve19	ENSDART00000013093			ENSDARG00000003642.8
CNE14_1_q0.3_peak_1049	chr1	14671933	14753729	+	1305	NA	Intergenic	Intergenic	-3185	ENSDART00000184805.1	ENSDARG00000116266	#N/A	ENSDART00000184805			ENSDARG00000116266.1
CNE14_1_q0.3_peak_73153	chr7	9326004	9326800	+	1304	NA	exon (ENSDART00000104536.5, exon 1 of 3)	-exon (ENSDART00000104536.5, exon 1 of 3)	168	ENSDART00000104536.5	ENSDARG00000079027	chsy1	ENSDART00000104536			ENSDARG00000079027.6
CNE14_1_q0.3_peak_10371	chr12	13205083	13206200	+	1303	NA	promoter-TSS (ENSDART00000092906.6)	-promoter-TSS (ENSDART00000092906.6)	-69	ENSDART00000152670.2	ENSDARG00000055477	pelo	ENSDART00000152670			ENSDARG00000055477.7
CNE14_1_q0.3_peak_10638	chr12	18408397	18408836	+	1303	NA	promoter-TSS (ENSDART00000078767.6)	-promoter-TSS (ENSDART00000078767.6)	-28	ENSDART00000152748.3	ENSDARG00000009217	tom1l2	ENSDART00000078767			ENSDARG00000009217.12
CNE14_1_q0.3_peak_81218	chr9	9776692	9777103	+	1303	NA	intron (ENSDART00000121456.3, intron 2 of 10)	-intron (ENSDART00000121456.3, intron 2 of 10)	28422	ENSDART00000134179.3	ENSDARG00000039576	fstl1b	ENSDART00000134179			ENSDARG00000039576.8
CNE14_1_q0.3_peak_68967	chr6	2271166	2271759	+	1302	NA	promoter-TSS (ENSDART00000165223.2)	-promoter-TSS (ENSDART00000165223.2)	-97	ENSDART00000165223.2	ENSDARG00000101131	pbx1b	ENSDART00000165223			ENSDARG00000101131.2
CNE14_1_q0.3_peak_34094	chr19	41641872	41642277	+	1300	NA	Intergenic	Intergenic	-59586	ENSDART00000033362.9	ENSDARG00000005834	gatad2b	ENSDART00000033362			ENSDARG00000005834.12
CNE14_1_q0.3_peak_31633	chr18	47131894	47132279	+	1300	NA	Intergenic	Intergenic	-28955	ENSDART00000188553.1	ENSDARG00000116487	#N/A	ENSDART00000188553			ENSDARG00000116487.1
CNE14_1_q0.3_peak_29633	chr18	6278723	6279189	+	1300	NA	Intergenic	Intergenic	-21652	ENSDART00000140671.3	ENSDARG00000092963	#N/A	ENSDART00000133299			ENSDARG00000092963.3
CNE14_1_q0.3_peak_73922	chr7	22809607	22810251	+	1299	NA	promoter-TSS (ENSDART00000020212.11)	-promoter-TSS (ENSDART00000020212.11)	-8	ENSDART00000143455.4	ENSDARG00000008188	sf1	ENSDART00000139321			ENSDARG00000008188.12
CNE14_1_q0.3_peak_1454	chr1	26604449	26605236	+	1298	NA	promoter-TSS (ENSDART00000011645.11)	-promoter-TSS (ENSDART00000011645.11)	-223	ENSDART00000011645.11	ENSDARG00000005210	coro2a	ENSDART00000152643			ENSDARG00000005210.12
CNE14_1_q0.3_peak_50901	chr23	31645677	31646054	+	1298	NA	promoter-TSS (ENSDART00000035031.7)	-promoter-TSS (ENSDART00000035031.7)	-105	ENSDART00000035031.7	ENSDARG00000025522	sgk1	ENSDART00000035031			ENSDARG00000025522.7
CNE14_1_q0.3_peak_9016	chr11	41852508	41854066	+	1297	NA	intron (ENSDART00000002556.8, intron 2 of 7)	-intron (ENSDART00000002556.8, intron 2 of 7)	587	ENSDART00000002556.8	ENSDARG00000007130	mrto4	ENSDART00000002556			ENSDARG00000007130.8
CNE14_1_q0.3_peak_84459	chrKN150361.1	15793	16325	+	1297	NA	NA	NA	NA	NA
CNE14_1_q0.3_peak_73637	chr7	16600574	16600895	+	1297	NA	Intergenic	Intergenic	-2522	ENSDART00000128488.4	ENSDARG00000057323	e2f8	ENSDART00000131726			ENSDARG00000057323.8
CNE14_1_q0.3_peak_49014	chr23	2128959	2130760	+	1296	NA	Intergenic	Intergenic	-6485	ENSDART00000092757.5	ENSDARG00000052604	cpeb2	ENSDART00000085290			ENSDARG00000052604.6
CNE14_1_q0.3_peak_76972	chr8	2456685	2457097	+	1296	NA	promoter-TSS (ENSDART00000002764.9)	-promoter-TSS (ENSDART00000002764.9)	37	ENSDART00000002764.9	ENSDARG00000003749	polb	ENSDART00000002764			ENSDARG00000003749.10
CNE14_1_q0.3_peak_47060	chr22	20924256	20924670	+	1295	NA	exon (ENSDART00000032770.4, exon 1 of 11)	-exon (ENSDART00000032770.4, exon 1 of 11)	101	ENSDART00000100642.5	ENSDARG00000000568	ell	ENSDART00000100642			ENSDARG00000000568.9
CNE14_1_q0.3_peak_71194	chr6	50673438	50673824	+	1295	NA	intron (ENSDART00000134146.3, intron 1 of 14)	-intron (ENSDART00000134146.3, intron 1 of 14)	12231	ENSDART00000134146.3	ENSDARG00000059604	mtss1	ENSDART00000151500			ENSDARG00000059604.8
CNE14_1_q0.3_peak_35038	chr2	1371950	1372623	+	1293	NA	Intergenic	Intergenic	-7608	ENSDART00000011919.10	ENSDARG00000002970	ss18	ENSDART00000011919			ENSDARG00000002970.10
CNE14_1_q0.3_peak_49137	chr23	2905958	2906603	+	1293	NA	exon (ENSDART00000109304.4, exon 1 of 4)	-exon (ENSDART00000109304.4, exon 1 of 4)	249	ENSDART00000109304.4	ENSDARG00000074790	rab5if	ENSDART00000109304			ENSDARG00000074790.4
CNE14_1_q0.3_peak_48752	chr23	763698	764338	+	1293	NA	exon (ENSDART00000010248.10, exon 1 of 10)	-exon (ENSDART00000010248.10, exon 1 of 10)	117	ENSDART00000183978.1	ENSDARG00000037833	mitfb	ENSDART00000010248			ENSDARG00000037833.8
CNE14_1_q0.3_peak_61190	chr4	3358216	3358564	+	1292	NA	promoter-TSS (ENSDART00000075320.6)	-promoter-TSS (ENSDART00000075320.6)	7	ENSDART00000075320.6	ENSDARG00000030598	nampta	ENSDART00000075320			ENSDARG00000030598.8
CNE14_1_q0.3_peak_57670	chr3	5199584	5200063	+	1292	NA	intron (ENSDART00000137105.3, intron 1 of 33)	-intron (ENSDART00000092373.7, intron 1 of 35)	28314	ENSDART00000137105.3	ENSDARG00000001014	myh9b	ENSDART00000182438			ENSDARG00000001014.14
CNE14_1_q0.3_peak_63623	chr4	71128630	71644613	+	1292	NA	intron (ENSDART00000170807.2, intron 7 of 10)	-intron (ENSDART00000170807.2, intron 7 of 10)	-2394	ENSDART00000163253.2	ENSDARG00000104650	#N/A	ENSDART00000163253			ENSDARG00000104650.2
CNE14_1_q0.3_peak_5746	chr10	38526376	38526954	+	1291	NA	promoter-TSS (ENSDART00000157222.2)	-promoter-TSS (ENSDART00000157222.2)	45	ENSDART00000157222.2	ENSDARG00000097896	#N/A	ENSDART00000157222			ENSDARG00000097896.2
CNE14_1_q0.3_peak_67029	chr5	49744487	49744825	+	1291	NA	promoter-TSS (ENSDART00000133384.3)	-promoter-TSS (ENSDART00000133384.3)	-57	ENSDART00000133384.3	ENSDARG00000052695	nr2f1a	ENSDART00000133384			ENSDARG00000052695.6
CNE14_1_q0.3_peak_11486	chr12	42548135	42548696	+	1289	NA	intron (ENSDART00000177303.2, intron 10 of 15)	-intron (ENSDART00000167324.2, intron 10 of 15)	-25733	ENSDART00000157855.2	ENSDARG00000100244	ebf3a	ENSDART00000157855			ENSDARG00000100244.3
CNE14_1_q0.3_peak_15162	chr13	49444404	49444926	+	1288	NA	promoter-TSS (ENSDART00000136991.2)	-promoter-TSS (ENSDART00000136991.2)	-29	ENSDART00000136991.2	ENSDARG00000004702	irf2bp2a	ENSDART00000136991			ENSDARG00000004702.9
CNE14_1_q0.3_peak_69828	chr6	18975664	18976303	+	1288	NA	intron (ENSDART00000184729.1, intron 3 of 11)	-intron (ENSDART00000170039.2, intron 1 of 9)	185	ENSDART00000170039.2	ENSDARG00000103900	sept9b	ENSDART00000170039			ENSDARG00000103900.2
CNE14_1_q0.3_peak_69816	chr6	18531730	18532152	+	1288	NA	promoter-TSS (ENSDART00000160693.2)	-promoter-TSS (ENSDART00000160693.2)	9	ENSDART00000165271.2	ENSDARG00000098924	suz12b	ENSDART00000165271			ENSDARG00000098924.2
CNE14_1_q0.3_peak_13683	chr13	18069222	18069562	+	1287	NA	promoter-TSS (ENSDART00000134477.2)	-promoter-TSS (ENSDART00000134477.2)	29	ENSDART00000146772.3	ENSDARG00000076703	zfand4	ENSDART00000134477			ENSDARG00000076703.5
CNE14_1_q0.3_peak_60666	chr3	59900779	59901116	+	1287	NA	intron (ENSDART00000064311.6, intron 1 of 5)	-intron (ENSDART00000064311.6, intron 1 of 5)	1495	ENSDART00000064311.6	ENSDARG00000043795	arhgdia	ENSDART00000064311			ENSDARG00000043795.6
CNE14_1_q0.3_peak_66079	chr5	26686381	26686796	+	1285	NA	promoter-TSS (ENSDART00000079064.5)	-promoter-TSS (ENSDART00000079064.5)	-51	ENSDART00000079064.5	ENSDARG00000056550	tango2	ENSDART00000079064			ENSDARG00000056550.5
CNE14_1_q0.3_peak_41609	chr20	46586487	46586809	+	1284	NA	promoter-TSS (ENSDART00000014166.6)	-promoter-TSS (ENSDART00000014166.6)	-30	ENSDART00000014166.6	ENSDARG00000020133	jdp2b	ENSDART00000014166			ENSDARG00000020133.7
CNE14_1_q0.3_peak_75738	chr7	67467309	67468115	+	1284	NA	promoter-TSS (ENSDART00000168460.2)	-promoter-TSS (ENSDART00000168460.2)	10	ENSDART00000168460.2	ENSDARG00000099380	rpl13	ENSDART00000168460			ENSDARG00000099380.3
CNE14_1_q0.3_peak_10343	chr12	11306353	11306920	+	1284	NA	exon (ENSDART00000036989.8, exon 1 of 9)	-exon (ENSDART00000036989.8, exon 1 of 9)	130	ENSDART00000036989.8	ENSDARG00000024398	get4	ENSDART00000036989			ENSDARG00000024398.8
CNE14_1_q0.3_peak_2154	chr1	36665302	36665774	+	1282	NA	promoter-TSS (ENSDART00000010632.7)	-promoter-TSS (ENSDART00000010632.7)	-5	ENSDART00000125013.3	ENSDARG00000011876	ednraa	ENSDART00000186772			ENSDARG00000011876.8
CNE14_1_q0.3_peak_21530	chr15	44077454	44078046	+	1282	NA	exon (ENSDART00000110112.5, exon 1 of 5)	-exon (ENSDART00000110112.5, exon 1 of 5)	187	ENSDART00000110112.5	ENSDARG00000076464	lamtor1	ENSDART00000110112			ENSDARG00000076464.5
CNE14_1_q0.3_peak_74502	chr7	39751326	39751732	+	1279	NA	promoter-TSS (ENSDART00000016803.6)	-promoter-TSS (ENSDART00000016803.6)	11	ENSDART00000016803.6	ENSDARG00000010021	grpel1	ENSDART00000138414			ENSDARG00000010021.6
CNE14_1_q0.3_peak_24577	chr16	46111589	46112046	+	1278	NA	promoter-TSS (ENSDART00000172232.2)	-promoter-TSS (ENSDART00000172232.2)	-32	ENSDART00000172232.2	ENSDARG00000059945	sv2a	ENSDART00000083919			ENSDARG00000059945.6
CNE14_1_q0.3_peak_32598	chr19	3653668	3654028	+	1278	NA	promoter-TSS (ENSDART00000125673.3)	-promoter-TSS (ENSDART00000125673.3)	-128	ENSDART00000125673.3	ENSDARG00000089878	nedd9	ENSDART00000125673			ENSDARG00000089878.3
CNE14_1_q0.3_peak_36139	chr2	15100586	15100932	+	1277	NA	promoter-TSS (ENSDART00000027171.8)	-promoter-TSS (ENSDART00000027171.8)	17	ENSDART00000027171.8	ENSDARG00000005673	f3b	ENSDART00000027171			ENSDARG00000005673.8
CNE14_1_q0.3_peak_57904	chr3	7049254	7094083	+	1276	NA	intron (ENSDART00000158652.2, intron 2 of 2)	-intron (ENSDART00000158652.2, intron 2 of 2)	31305	ENSDART00000157805.2	ENSDARG00000105074	LOC101884528	ENSDART00000157805			ENSDARG00000105074.2
CNE14_1_q0.3_peak_11190	chr12	35505221	35505711	+	1276	NA	exon (ENSDART00000105518.6, exon 1 of 21)	-exon (ENSDART00000105518.6, exon 1 of 21)	144	ENSDART00000105518.6	ENSDARG00000071395	camk2g1	ENSDART00000146109			ENSDARG00000071395.8
CNE14_1_q0.3_peak_56240	chr25	30316204	30316696	+	1276	NA	promoter-TSS (ENSDART00000067056.5)	-promoter-TSS (ENSDART00000067056.5)	-389	ENSDART00000067056.5	ENSDARG00000045605	ticrr	ENSDART00000067056			ENSDARG00000045605.5
CNE14_1_q0.3_peak_12103	chr12	48671489	48671946	+	1275	NA	promoter-TSS (ENSDART00000007202.9)	-promoter-TSS (ENSDART00000007202.9)	-105	ENSDART00000007202.9	ENSDARG00000012632	zgc.92749	ENSDART00000007202			ENSDARG00000012632.9
CNE14_1_q0.3_peak_31313	chr18	45114286	45114681	+	1275	NA	promoter-TSS (ENSDART00000172328.3)	-promoter-TSS (ENSDART00000172328.3)	91	ENSDART00000172328.3	ENSDARG00000017058	large2	ENSDART00000127953			ENSDARG00000017058.10
CNE14_1_q0.3_peak_78209	chr8	26003539	26003921	+	1273	NA	intron (ENSDART00000184533.1, intron 9 of 13)	-intron (ENSDART00000184533.1, intron 9 of 13)	-1858	ENSDART00000117652.2	ENSDARG00000082598	mir135b	ENSDART00000117652			ENSDARG00000082598.2
CNE14_1_q0.3_peak_38001	chr2	54639791	54640312	+	1273	NA	promoter-TSS (ENSDART00000100103.5)	-promoter-TSS (ENSDART00000100103.5)	-87	ENSDART00000100103.5	ENSDARG00000069029	acss2l	ENSDART00000100103			ENSDARG00000069029.5
CNE14_1_q0.3_peak_65811	chr5	19052061	19052742	+	1272	NA	promoter-TSS (ENSDART00000133330.3)	-promoter-TSS (ENSDART00000133330.3)	96	ENSDART00000137802.2	ENSDARG00000068650	fam214b	ENSDART00000137802			ENSDARG00000068650.6
CNE14_1_q0.3_peak_32506	chr19	2546353	2546735	+	1272	NA	promoter-TSS (ENSDART00000097528.6)	-promoter-TSS (ENSDART00000097528.6)	-231	ENSDART00000148527.3	ENSDARG00000005186	sp4	ENSDART00000097528			ENSDARG00000005186.12
CNE14_1_q0.3_peak_16236	chr14	5861197	5861543	+	1272	NA	promoter-TSS (ENSDART00000041279.6)	-promoter-TSS (ENSDART00000041279.6)	-65	ENSDART00000041279.6	ENSDARG00000002344	tubb4b	ENSDART00000041279			ENSDARG00000002344.9
CNE14_1_q0.3_peak_26639	chr17	8727630	8727966	+	1271	NA	promoter-TSS (ENSDART00000049236.9)	-promoter-TSS (ENSDART00000049236.9)	-50	ENSDART00000148827.3	ENSDARG00000044062	ctbp2a	ENSDART00000017337			ENSDARG00000044062.9
CNE14_1_q0.3_peak_29439	chr18	3579782	3580321	+	1271	NA	exon (ENSDART00000158763.2, exon 1 of 14)	-exon (ENSDART00000158763.2, exon 1 of 14)	140	ENSDART00000172656.2	ENSDARG00000100679	lrch3	ENSDART00000159059			ENSDARG00000100679.3
CNE14_1_q0.3_peak_43782	chr21	8341722	8342081	+	1269	NA	promoter-TSS (ENSDART00000055325.7)	-promoter-TSS (ENSDART00000055325.7)	11	ENSDART00000132467.3	ENSDARG00000037962	psmb7	ENSDART00000055325			ENSDARG00000037962.7
CNE14_1_q0.3_peak_54223	chr24	39537315	39537744	+	1268	NA	promoter-TSS (ENSDART00000140868.3)	-promoter-TSS (ENSDART00000140868.3)	-36	ENSDART00000140868.3	ENSDARG00000094441	#N/A	ENSDART00000145358			ENSDARG00000094441.3
CNE14_1_q0.3_peak_41044	chr20	31905729	31906254	+	1268	NA	promoter-TSS (ENSDART00000142806.3)	-promoter-TSS (ENSDART00000142806.3)	-23	ENSDART00000142806.3	ENSDARG00000002656	stxbp5a	ENSDART00000139417			ENSDARG00000002656.12
CNE14_1_q0.3_peak_55611	chr25	14694746	14695189	+	1268	NA	promoter-TSS (ENSDART00000050478.6)	-promoter-TSS (ENSDART00000050478.6)	53	ENSDART00000188093.1	ENSDARG00000034443	mpped2	ENSDART00000050478			ENSDARG00000034443.6
CNE14_1_q0.3_peak_41386	chr20	42240983	42241691	+	1268	NA	promoter-TSS (ENSDART00000142791.2)	-promoter-TSS (ENSDART00000142791.2)	119	ENSDART00000034054.8	ENSDARG00000027813	nus1	ENSDART00000142791			ENSDARG00000027813.8
CNE14_1_q0.3_peak_38508	chr2	57378630	57379455	+	1267	NA	promoter-TSS (ENSDART00000149235.3)	-promoter-TSS (ENSDART00000149235.3)	174	ENSDART00000020529.9	ENSDARG00000005915	tcf3a	ENSDART00000149235			ENSDARG00000005915.12
CNE14_1_q0.3_peak_6713	chr11	2855236	2855757	+	1267	NA	promoter-TSS (ENSDART00000172837.2)	-promoter-TSS (ENSDART00000172837.2)	66	ENSDART00000172837.2	ENSDARG00000009733	kif21b	ENSDART00000093108			ENSDARG00000009733.11
CNE14_1_q0.3_peak_55409	chr25	8660480	8660894	+	1266	NA	promoter-TSS (ENSDART00000161180.2)	-promoter-TSS (ENSDART00000161180.2)	39	ENSDART00000161180.2	ENSDARG00000103643	unc45a	ENSDART00000161180			ENSDARG00000103643.3
CNE14_1_q0.3_peak_22652	chr16	4317685	4318068	+	1265	NA	promoter-TSS (ENSDART00000167719.2)	-promoter-TSS (ENSDART00000167719.2)	3	ENSDART00000167719.2	ENSDARG00000103542	vegfaa	ENSDART00000167719			ENSDARG00000103542.2
CNE14_1_q0.3_peak_66523	chr5	38200529	38201020	+	1264	NA	promoter-TSS (ENSDART00000100769.5)	-promoter-TSS (ENSDART00000100769.5)	-33	ENSDART00000100769.5	ENSDARG00000031336	hsd20b2	ENSDART00000100769			ENSDARG00000031336.8
CNE14_1_q0.3_peak_9375	chr11	44503502	44503896	+	1263	NA	promoter-TSS (ENSDART00000169295.3)	-promoter-TSS (ENSDART00000169295.3)	-75	ENSDART00000169295.3	ENSDARG00000103915	ero1b	ENSDART00000169295			ENSDARG00000103915.3
CNE14_1_q0.3_peak_29611	chr18	5874953	5875505	+	1263	NA	promoter-TSS (ENSDART00000122009.3)	-promoter-TSS (ENSDART00000122009.3)	-39	ENSDART00000122009.3	ENSDARG00000088817	wdr59	ENSDART00000122009			ENSDARG00000088817.5
CNE14_1_q0.3_peak_75584	chr7	64597491	64599225	+	1263	NA	Intergenic	Intergenic	-8438	ENSDART00000172619.2	ENSDARG00000100518	zmp.0000000660	ENSDART00000184113			ENSDARG00000100518.2
CNE14_1_q0.3_peak_62864	chr4	49334394	49404378	+	1263	NA	Intergenic	Intergenic	47076	ENSDART00000167162.2	ENSDARG00000070299	#N/A	ENSDART00000167162			ENSDARG00000070299.5
CNE14_1_q0.3_peak_32510	chr19	2602680	2603368	+	1262	NA	intron (ENSDART00000033132.6, intron 1 of 10)	-intron (ENSDART00000033132.6, intron 1 of 10)	121	ENSDART00000033132.6	ENSDARG00000026762	fam126a	ENSDART00000169483			ENSDARG00000026762.6
CNE14_1_q0.3_peak_36810	chr2	35603443	35603939	+	1261	NA	promoter-TSS (ENSDART00000133018.2)	-promoter-TSS (ENSDART00000133018.2)	54	ENSDART00000133018.2	ENSDARG00000038754	plk3	ENSDART00000147278			ENSDARG00000038754.7
CNE14_1_q0.3_peak_9684	chr12	1054160	1054528	+	1261	NA	Intergenic	Intergenic	-19884	ENSDART00000152346.3	ENSDARG00000037358	polr3e	ENSDART00000152455			ENSDARG00000037358.7
CNE14_1_q0.3_peak_74883	chr7	50272592	50273024	+	1261	NA	exon (ENSDART00000098842.5, exon 1 of 11)	-exon (ENSDART00000098842.5, exon 1 of 11)	104	ENSDART00000098842.5	ENSDARG00000035872	hsd17b12b	ENSDART00000098842			ENSDARG00000035872.8
CNE14_1_q0.3_peak_12042	chr12	48412843	48413336	+	1261	NA	Intergenic	Intergenic	17396	ENSDART00000180362.1	ENSDARG00000033662	scd	ENSDART00000180362			ENSDARG00000033662.8
CNE14_1_q0.3_peak_29612	chr18	5917288	5917901	+	1261	NA	promoter-TSS (ENSDART00000169100.2)	-promoter-TSS (ENSDART00000169100.2)	-31	ENSDART00000169100.2	ENSDARG00000101210	glg1b	ENSDART00000169100			ENSDARG00000101210.3
CNE14_1_q0.3_peak_59429	chr3	44059887	44060233	+	1260	NA	promoter-TSS (ENSDART00000158485.2)	-promoter-TSS (ENSDART00000158485.2)	-23	ENSDART00000165628.2	ENSDARG00000102583	il4r.1	ENSDART00000158485			ENSDARG00000102583.3
CNE14_1_q0.3_peak_3032	chr1	56136840	56137848	+	1260	NA	intron (ENSDART00000052688.7, intron 35 of 40)	-intron (ENSDART00000052688.7, intron 35 of 40)	-14859	ENSDART00000133079.3	ENSDARG00000053462	#N/A	ENSDART00000133079			ENSDARG00000053462.8
CNE14_1_q0.3_peak_47484	chr22	28803568	28803882	+	1259	NA	promoter-TSS (ENSDART00000129476.3)	-promoter-TSS (ENSDART00000129476.3)	-14	ENSDART00000129476.3	ENSDARG00000054858	tp53bp2b	ENSDART00000189726			ENSDARG00000054858.8
CNE14_1_q0.3_peak_42509	chr20	53135517	53136616	+	1259	NA	Intergenic	Intergenic	-24794	ENSDART00000180604.1	ENSDARG00000110451	#N/A	ENSDART00000180604			ENSDARG00000110451.1
CNE14_1_q0.3_peak_43882	chr21	10701870	10702257	+	1258	NA	promoter-TSS (ENSDART00000102304.4)	-promoter-TSS (ENSDART00000102304.4)	32	ENSDART00000102304.4	ENSDARG00000069980	lman1	ENSDART00000102304			ENSDARG00000069980.5
CNE14_1_q0.3_peak_13688	chr13	18260943	18261300	+	1258	NA	intron (ENSDART00000109642.4, intron 1 of 9)	-intron (ENSDART00000109642.4, intron 1 of 9)	-15066	ENSDART00000141009.2	ENSDARG00000075230	tet1	ENSDART00000109642			ENSDARG00000075230.6
CNE14_1_q0.3_peak_26830	chr17	12075657	12076076	+	1257	NA	promoter-TSS (ENSDART00000155329.2)	-promoter-TSS (ENSDART00000155329.2)	61	ENSDART00000155329.2	ENSDARG00000086283	cnsta	ENSDART00000155329			ENSDARG00000086283.4
CNE14_1_q0.3_peak_36558	chr2	27330196	27330618	+	1257	NA	promoter-TSS (ENSDART00000087643.3)	-promoter-TSS (ENSDART00000087643.3)	-54	ENSDART00000087643.3	ENSDARG00000061450	tesk2	ENSDART00000087643			ENSDARG00000061450.6
CNE14_1_q0.3_peak_72906	chr7	6344930	6455498	+	1256	NA	TTS (ENSDART00000172816.2)	-TTS (ENSDART00000172816.2)	881	ENSDART00000172816.2	ENSDARG00000105496	#N/A	ENSDART00000172816			ENSDARG00000105496.2
CNE14_1_q0.3_peak_44296	chr21	24865293	24865834	+	1255	NA	promoter-TSS (ENSDART00000101136.5)	-promoter-TSS (ENSDART00000101136.5)	-109	ENSDART00000142907.2	ENSDARG00000069467	igsf9bb	ENSDART00000101136			ENSDARG00000069467.6
CNE14_1_q0.3_peak_5046	chr10	17591722	17592532	+	1255	NA	promoter-TSS (ENSDART00000141221.2)	-promoter-TSS (ENSDART00000141221.2)	-146	ENSDART00000141221.2	ENSDARG00000014939	kcnn2	ENSDART00000141221			ENSDARG00000014939.12
CNE14_1_q0.3_peak_68203	chr5	70174116	70174751	+	1255	NA	intron (ENSDART00000165570.2, intron 2 of 4)	-intron (ENSDART00000165570.2, intron 2 of 4)	18498	ENSDART00000165570.2	ENSDARG00000099746	rgs3a	ENSDART00000165570			ENSDARG00000099746.2
CNE14_1_q0.3_peak_5131	chr10	20589997	20590555	+	1254	NA	promoter-TSS (ENSDART00000131819.2)	-promoter-TSS (ENSDART00000131819.2)	86	ENSDART00000131819.2	ENSDARG00000077515	letm2	ENSDART00000131819			ENSDARG00000077515.6
CNE14_1_q0.3_peak_32852	chr19	9381329	9382085	+	1253	NA	intron (ENSDART00000194368.1, intron 1 of 2)	-intron (ENSDART00000194368.1, intron 1 of 2)	257	ENSDART00000194368.1	ENSDARG00000117353	#N/A	ENSDART00000194368			ENSDARG00000117353.1
CNE14_1_q0.3_peak_36911	chr2	37584007	37584573	+	1253	NA	intron (ENSDART00000008302.6, intron 2 of 20)	-intron (ENSDART00000008302.6, intron 2 of 20)	-6309	ENSDART00000144037.2	ENSDARG00000011948	insra	ENSDART00000144037			ENSDARG00000011948.10
CNE14_1_q0.3_peak_75730	chr7	67316584	67317108	+	1253	NA	promoter-TSS (ENSDART00000159408.2)	-promoter-TSS (ENSDART00000159408.2)	57	ENSDART00000159408.2	ENSDARG00000102417	psmd7	ENSDART00000159408			ENSDARG00000102417.2
CNE14_1_q0.3_peak_34759	chr2	25278	25976	+	1253	NA	Intergenic	Intergenic	-3092	ENSDART00000157877.2	ENSDARG00000100145	#N/A	ENSDART00000157877			ENSDARG00000100145.2
CNE14_1_q0.3_peak_12186	chr13	44293	45055	+	1253	NA	promoter-TSS (ENSDART00000093247.4)	-promoter-TSS (ENSDART00000093247.4)	-251	ENSDART00000093247.4	ENSDARG00000104596	ston1	ENSDART00000093247			ENSDARG00000104596.2
CNE14_1_q0.3_peak_11816	chr12	46634505	46634922	+	1253	NA	promoter-TSS (ENSDART00000008009.8)	-promoter-TSS (ENSDART00000008009.8)	-23	ENSDART00000008009.8	ENSDARG00000010673	trim16	ENSDART00000008009			ENSDARG00000010673.8
CNE14_1_q0.3_peak_30385	chr18	26675507	26676147	+	1253	NA	promoter-TSS (ENSDART00000113280.4)	-promoter-TSS (ENSDART00000113280.4)	-128	ENSDART00000113280.4	ENSDARG00000075942	LOC570903	ENSDART00000135133			ENSDARG00000075942.5
CNE14_1_q0.3_peak_70713	chr6	40098355	40098805	+	1252	NA	promoter-TSS (ENSDART00000017402.7)	-promoter-TSS (ENSDART00000017402.7)	61	ENSDART00000017402.7	ENSDARG00000019613	ip6k2b	ENSDART00000155327			ENSDARG00000019613.7
CNE14_1_q0.3_peak_18498	chr14	49991922	49992732	+	1252	NA	exon (ENSDART00000159988.3, exon 1 of 10)	-exon (ENSDART00000159988.3, exon 1 of 10)	382	ENSDART00000159988.3	ENSDARG00000102831	fam193b	ENSDART00000159988			ENSDARG00000102831.3
CNE14_1_q0.3_peak_8143	chr11	24348225	24348651	+	1252	NA	promoter-TSS (ENSDART00000089747.7)	-promoter-TSS (ENSDART00000089747.7)	13	ENSDART00000089747.7	ENSDARG00000062237	nfs1	ENSDART00000089747			ENSDARG00000062237.7
CNE14_1_q0.3_peak_14065	chr13	28820019	28820403	+	1252	NA	exon (ENSDART00000101653.5, exon 1 of 21)	-exon (ENSDART00000101653.5, exon 1 of 21)	443	ENSDART00000188895.1	ENSDARG00000062790	tacc2	ENSDART00000189554			ENSDARG00000062790.6
CNE14_1_q0.3_peak_68886	chr6	1590922	1591231	+	1252	NA	promoter-TSS (ENSDART00000087039.7)	-promoter-TSS (ENSDART00000087039.7)	-74	ENSDART00000087039.7	ENSDARG00000015563	#N/A	ENSDART00000178877			ENSDARG00000015563.11
CNE14_1_q0.3_peak_44274	chr21	23919666	23925828	+	1252	NA	Intergenic	Intergenic	-14204	ENSDART00000194470.1	ENSDARG00000117523	#N/A	ENSDART00000194470			ENSDARG00000117523.1
CNE14_1_q0.3_peak_65989	chr5	24219156	24219613	+	1251	NA	promoter-TSS (ENSDART00000011878.6)	-promoter-TSS (ENSDART00000011878.6)	-40	ENSDART00000011878.6	ENSDARG00000003032	eif4a1b	ENSDART00000011878			ENSDARG00000003032.6
CNE14_1_q0.3_peak_42607	chr20	53981401	53981716	+	1251	NA	promoter-TSS (ENSDART00000023550.11)	-promoter-TSS (ENSDART00000023550.11)	68	ENSDART00000023550.11	ENSDARG00000024746	hsp90aa1.2	ENSDART00000023550			ENSDARG00000024746.12
CNE14_1_q0.3_peak_2544	chr1	47391160	47391541	+	1251	NA	promoter-TSS (ENSDART00000113559.5)	-promoter-TSS (ENSDART00000113559.5)	-54	ENSDART00000113559.5	ENSDARG00000036687	bcl9	ENSDART00000053284			ENSDARG00000036687.9
CNE14_1_q0.3_peak_84570	chrKN150544.1	119	830	+	1250	NA	NA	NA	NA	NA
CNE14_1_q0.3_peak_66121	chr5	27994504	27994825	+	1250	NA	promoter-TSS (ENSDART00000132740.3)	-promoter-TSS (ENSDART00000132740.3)	15	ENSDART00000132740.3	ENSDARG00000014962	ppp3cca	ENSDART00000175819			ENSDARG00000014962.13
CNE14_1_q0.3_peak_61590	chr4	16124235	16124888	+	1249	NA	promoter-TSS (ENSDART00000077664.7)	-promoter-TSS (ENSDART00000077664.7)	-142	ENSDART00000077664.7	ENSDARG00000012684	atp2b1a	ENSDART00000128079			ENSDARG00000012684.13
CNE14_1_q0.3_peak_43897	chr21	11054670	11055346	+	1249	NA	promoter-TSS (ENSDART00000084061.7)	-promoter-TSS (ENSDART00000084061.7)	-132	ENSDART00000146576.3	ENSDARG00000060006	nedd4l	ENSDART00000191378			ENSDARG00000060006.8
CNE14_1_q0.3_peak_43786	chr21	8426707	8427279	+	1249	NA	promoter-TSS (ENSDART00000143151.2)	-promoter-TSS (ENSDART00000143151.2)	-66	ENSDART00000143151.2	ENSDARG00000014592	dennd1a	ENSDART00000143151			ENSDARG00000014592.10
CNE14_1_q0.3_peak_23501	chr16	18165700	18418651	+	1249	NA	Intergenic	Intergenic	80365	ENSDART00000159398.2	ENSDARG00000105264	#N/A	ENSDART00000159398			ENSDARG00000105264.2
CNE14_1_q0.3_peak_22692	chr16	4654211	4655025	+	1249	NA	intron (ENSDART00000167665.2, intron 1 of 3)	-intron (ENSDART00000167665.2, intron 1 of 3)	285	ENSDART00000167665.2	ENSDARG00000004328	si.ch1073.284b18.2	ENSDART00000006212			ENSDARG00000004328.7
CNE14_1_q0.3_peak_30984	chr18	36761643	36762011	+	1249	NA	Intergenic	Intergenic	-7931	ENSDART00000180375.1	ENSDARG00000055751	fosb	ENSDART00000078151			ENSDARG00000055751.7
CNE14_1_q0.3_peak_67565	chr5	61798957	61799824	+	1247	NA	promoter-TSS (ENSDART00000113508.5)	-promoter-TSS (ENSDART00000113508.5)	-239	ENSDART00000113508.5	ENSDARG00000079780	hnrnpul1l	ENSDART00000113508			ENSDARG00000079780.5
CNE14_1_q0.3_peak_59462	chr3	45308247	45308851	+	1245	NA	promoter-TSS (ENSDART00000155324.3)	-promoter-TSS (ENSDART00000155324.3)	-155	ENSDART00000155324.3	ENSDARG00000062304	pdpk1a	ENSDART00000155324			ENSDARG00000062304.7
CNE14_1_q0.3_peak_36137	chr2	15048243	15048679	+	1245	NA	promoter-TSS (ENSDART00000058484.6)	-promoter-TSS (ENSDART00000058484.6)	51	ENSDART00000058484.6	ENSDARG00000029856	cnn3b	ENSDART00000058484			ENSDARG00000029856.8
CNE14_1_q0.3_peak_23252	chr16	13613320	13614204	+	1245	NA	promoter-TSS (ENSDART00000139102.3)	-promoter-TSS (ENSDART00000139102.3)	-287	ENSDART00000139102.3	ENSDARG00000057652	dbpb	ENSDART00000080372			ENSDARG00000057652.7
CNE14_1_q0.3_peak_56821	chr25	35048455	35136434	+	1245	NA	TTS (ENSDART00000145165.2)	-TTS (ENSDART00000145165.2)	2343	ENSDART00000145165.2	ENSDARG00000012073	kif15	ENSDART00000145165			ENSDARG00000012073.11
CNE14_1_q0.3_peak_61501	chr4	12810088	12810594	+	1244	NA	Intergenic	Intergenic	-14852	ENSDART00000075127.6	ENSDARG00000053136	b2m	ENSDART00000150427			ENSDARG00000053136.7
CNE14_1_q0.3_peak_39050	chr20	1196136	1196613	+	1244	NA	promoter-TSS (ENSDART00000041192.7)	-promoter-TSS (ENSDART00000041192.7)	-12	ENSDART00000041192.7	ENSDARG00000033138	lyrm2	ENSDART00000041192			ENSDARG00000033138.7
CNE14_1_q0.3_peak_33110	chr19	15192497	15193027	+	1243	NA	promoter-TSS (ENSDART00000048151.7)	-promoter-TSS (ENSDART00000048151.7)	78	ENSDART00000151337.3	ENSDARG00000015552	phactr4a	ENSDART00000169883			ENSDARG00000015552.13
CNE14_1_q0.3_peak_60779	chr3	60588993	60589814	+	1242	NA	promoter-TSS (ENSDART00000157822.2)	-promoter-TSS (ENSDART00000157822.2)	-111	ENSDART00000157822.2	ENSDARG00000102896	jmjd6	ENSDART00000157822			ENSDARG00000102896.2
CNE14_1_q0.3_peak_15535	chr13	51913844	51914176	+	1240	NA	intron (ENSDART00000168648.2, intron 2 of 2)	-intron (ENSDART00000168648.2, intron 2 of 2)	8280	ENSDART00000168648.2	ENSDARG00000102867	srfb	ENSDART00000168648			ENSDARG00000102867.2
CNE14_1_q0.3_peak_17197	chr14	20342502	20343047	+	1240	NA	exon (ENSDART00000074070.7, exon 1 of 21)	-exon (ENSDART00000074070.7, exon 1 of 21)	202	ENSDART00000167637.2	ENSDARG00000052242	aff2	ENSDART00000167637			ENSDARG00000052242.7
CNE14_1_q0.3_peak_6260	chr10	43884684	43885008	+	1239	NA	intron (ENSDART00000168014.2, intron 11 of 19)	-intron (ENSDART00000086220.5, intron 11 of 17)	-18459	ENSDART00000135680.3	ENSDARG00000060871	mctp1b	ENSDART00000135680			ENSDARG00000060871.6
CNE14_1_q0.3_peak_79114	chr8	46321737	46322122	+	1238	NA	promoter-TSS (ENSDART00000075189.6)	-promoter-TSS (ENSDART00000075189.6)	-11	ENSDART00000122801.4	ENSDARG00000053196	mtor	ENSDART00000075189			ENSDARG00000053196.8
CNE14_1_q0.3_peak_1747	chr1	29653396	29653759	+	1238	NA	promoter-TSS (ENSDART00000109224.3)	-promoter-TSS (ENSDART00000109224.3)	-105	ENSDART00000109224.3	ENSDARG00000074117	si.dkey.1h24.2	ENSDART00000109224			ENSDARG00000074117.4
CNE14_1_q0.3_peak_21993	chr15	47484623	47517898	+	1238	NA	intron (ENSDART00000122372.3, intron 3 of 37)	-intron (ENSDART00000122372.3, intron 3 of 37)	8422	ENSDART00000122372.3	ENSDARG00000088083	#N/A	ENSDART00000122372			ENSDARG00000088083.3
CNE14_1_q0.3_peak_29418	chr18	3166053	3167116	+	1238	NA	exon (ENSDART00000165002.2, exon 1 of 3)	-exon (ENSDART00000165002.2, exon 1 of 3)	142	ENSDART00000165002.2	ENSDARG00000100555	aqp11	ENSDART00000165002			ENSDARG00000100555.2
CNE14_1_q0.3_peak_49970	chr23	12701152	12701971	+	1237	NA	intron (ENSDART00000180549.1, intron 8 of 11)	-intron (ENSDART00000103231.5, intron 9 of 12)	33873	ENSDART00000139166.2	ENSDARG00000074457	si.dkey.96f10.1	ENSDART00000180549			ENSDARG00000074457.5
CNE14_1_q0.3_peak_14802	chr13	47189846	47190218	+	1236	NA	Intergenic	Intergenic	-35499	ENSDART00000183991.1	ENSDARG00000116876	#N/A	ENSDART00000183991			ENSDARG00000116876.1
CNE14_1_q0.3_peak_78097	chr8	21224947	21225315	+	1236	NA	promoter-TSS (ENSDART00000129210.4)	-promoter-TSS (ENSDART00000129210.4)	67	ENSDART00000129210.4	ENSDARG00000069074	cry3a	ENSDART00000129210			ENSDARG00000069074.7
CNE14_1_q0.3_peak_56306	chr25	31118599	31119062	+	1236	NA	promoter-TSS (ENSDART00000009126.10)	-promoter-TSS (ENSDART00000009126.10)	93	ENSDART00000009126.10	ENSDARG00000010844	kras	ENSDART00000009126			ENSDARG00000010844.11
CNE14_1_q0.3_peak_47968	chr22	34701516	34702070	+	1236	NA	promoter-TSS (ENSDART00000082066.4)	-promoter-TSS (ENSDART00000082066.4)	-55	ENSDART00000082066.4	ENSDARG00000059057	atpv0e2	ENSDART00000082066			ENSDARG00000059057.4
CNE14_1_q0.3_peak_59759	chr3	51684800	51685186	+	1236	NA	promoter-TSS (ENSDART00000091180.7)	-promoter-TSS (ENSDART00000091180.7)	30	ENSDART00000091180.7	ENSDARG00000062799	baiap2a	ENSDART00000091180			ENSDARG00000062799.8
CNE14_1_q0.3_peak_61215	chr4	4170473	4216145	+	1236	NA	Intergenic	Intergenic	26965	ENSDART00000145235.2	ENSDARG00000093470	#N/A	ENSDART00000145235			ENSDARG00000093470.2
CNE14_1_q0.3_peak_25191	chr16	52846664	52847130	+	1235	NA	promoter-TSS (ENSDART00000163151.2)	-promoter-TSS (ENSDART00000163151.2)	-182	ENSDART00000163151.2	ENSDARG00000105258	cep72	ENSDART00000163151			ENSDARG00000105258.2
CNE14_1_q0.3_peak_28765	chr17	51743801	51745015	+	1235	NA	promoter-TSS (ENSDART00000149807.2)	-promoter-TSS (ENSDART00000149807.2)	-42	ENSDART00000190955.1	ENSDARG00000007377	odc1	ENSDART00000149039			ENSDARG00000007377.9
CNE14_1_q0.3_peak_52789	chr24	16261765	16264144	+	1234	NA	Intergenic	Intergenic	55391	ENSDART00000152018.2	ENSDARG00000096436	#N/A	ENSDART00000151949			ENSDARG00000096436.3
CNE14_1_q0.3_peak_54524	chr24	41988665	41989685	+	1234	NA	promoter-TSS (ENSDART00000169725.2)	-promoter-TSS (ENSDART00000169725.2)	67	ENSDART00000169725.2	ENSDARG00000098273	zbtb14	ENSDART00000169725			ENSDARG00000098273.2
CNE14_1_q0.3_peak_818	chr1	7659754	7660200	+	1233	NA	promoter-TSS (ENSDART00000085203.6)	-promoter-TSS (ENSDART00000085203.6)	-107	ENSDART00000085203.6	ENSDARG00000074050	efnb2b	ENSDART00000085203			ENSDARG00000074050.5
CNE14_1_q0.3_peak_71075	chr6	48346441	48346815	+	1233	NA	TTS (ENSDART00000149159.2)	-TTS (ENSDART00000149159.2)	870	ENSDART00000149159.2	ENSDARG00000034240	capza1a	ENSDART00000149159			ENSDARG00000034240.9
CNE14_1_q0.3_peak_13517	chr13	14929117	14929524	+	1233	NA	promoter-TSS (ENSDART00000020576.9)	-promoter-TSS (ENSDART00000020576.9)	-84	ENSDART00000020576.9	ENSDARG00000010792	cdc25b	ENSDART00000142785			ENSDARG00000010792.9
CNE14_1_q0.3_peak_80242	chr9	263129	263915	+	1232	NA	intron (ENSDART00000166231.2, intron 1 of 10)	-intron (ENSDART00000165585.2, intron 1 of 11)	651	ENSDART00000165585.2	ENSDARG00000099039	pcbp2	ENSDART00000166231			ENSDARG00000099039.2
CNE14_1_q0.3_peak_8351	chr11	30647024	30647714	+	1232	NA	promoter-TSS (ENSDART00000114792.4)	-promoter-TSS (ENSDART00000114792.4)	-176	ENSDART00000114792.4	ENSDARG00000078959	tpcn3	ENSDART00000114792			ENSDARG00000078959.4
CNE14_1_q0.3_peak_65126	chr5	6567400	6567919	+	1232	NA	promoter-TSS (ENSDART00000184985.1)	-promoter-TSS (ENSDART00000184985.1)	-195	ENSDART00000184985.1	ENSDARG00000068760	tnks1bp1	ENSDART00000184985			ENSDARG00000068760.6
CNE14_1_q0.3_peak_41272	chr20	38201561	38202346	+	1230	NA	exon (ENSDART00000022694.7, exon 1 of 6)	-exon (ENSDART00000022694.7, exon 1 of 6)	309	ENSDART00000022694.7	ENSDARG00000007869	ehd3	ENSDART00000022694			ENSDARG00000007869.8
CNE14_1_q0.3_peak_60492	chr3	58543372	58543735	+	1230	NA	exon (ENSDART00000042386.7, exon 1 of 4)	-exon (ENSDART00000042386.7, exon 1 of 4)	105	ENSDART00000042386.7	ENSDARG00000031618	unm_sa1261	ENSDART00000042386			ENSDARG00000031618.7
CNE14_1_q0.3_peak_48409	chr22	37796800	37797256	+	1229	NA	promoter-TSS (ENSDART00000124742.3)	-promoter-TSS (ENSDART00000124742.3)	-25	ENSDART00000191232.1	ENSDARG00000060783	acap2	ENSDART00000085931			ENSDARG00000060783.7
CNE14_1_q0.3_peak_6396	chr11	194364	194998	+	1229	NA	Intergenic	Intergenic	-4220	ENSDART00000194743.1	ENSDARG00000117291	#N/A	ENSDART00000194743			ENSDARG00000117291.1
CNE14_1_q0.3_peak_67533	chr5	61508213	61508712	+	1229	NA	promoter-TSS (ENSDART00000023676.6)	-promoter-TSS (ENSDART00000023676.6)	44	ENSDART00000023676.6	ENSDARG00000016904	bckdk	ENSDART00000023676			ENSDARG00000016904.6
CNE14_1_q0.3_peak_43472	chr21	5168908	5169225	+	1228	NA	promoter-TSS (ENSDART00000102559.5)	-promoter-TSS (ENSDART00000102559.5)	-88	ENSDART00000102559.5	ENSDARG00000004187	zgc.122979	ENSDART00000102559			ENSDARG00000004187.10
CNE14_1_q0.3_peak_6889	chr11	4026085	4026665	+	1227	NA	promoter-TSS (ENSDART00000161338.2)	-promoter-TSS (ENSDART00000161338.2)	96	ENSDART00000161338.2	ENSDARG00000029474	camk1b	ENSDART00000041417			ENSDARG00000029474.7
CNE14_1_q0.3_peak_69727	chr6	16733574	17497612	+	1226	NA	promoter-TSS (ENSDART00000189896.1)	-promoter-TSS (ENSDART00000189896.1)	-838	ENSDART00000189896.1	ENSDARG00000113606	#N/A	ENSDART00000189896			ENSDARG00000113606.1
CNE14_1_q0.3_peak_58310	chr3	12239512	12239908	+	1226	NA	Intergenic	Intergenic	-12351	ENSDART00000167356.3	ENSDARG00000103923	tfap4	ENSDART00000167356			ENSDARG00000103923.3
CNE14_1_q0.3_peak_35325	chr2	4302797	4303701	+	1225	NA	promoter-TSS (ENSDART00000162269.2)	-promoter-TSS (ENSDART00000162269.2)	68	ENSDART00000162269.2	ENSDARG00000099395	cables1	ENSDART00000161211			ENSDARG00000099395.2
CNE14_1_q0.3_peak_41160	chr20	35279756	35280156	+	1225	NA	promoter-TSS (ENSDART00000131974.3)	-promoter-TSS (ENSDART00000131974.3)	-12	ENSDART00000168216.2	ENSDARG00000006672	fam49a	ENSDART00000168216			ENSDARG00000006672.12
CNE14_1_q0.3_peak_76763	chr8	1284585	1284996	+	1224	NA	promoter-TSS (ENSDART00000061663.6)	-promoter-TSS (ENSDART00000061663.6)	6	ENSDART00000061663.6	ENSDARG00000042072	fbxl17	ENSDART00000192775			ENSDARG00000042072.6
CNE14_1_q0.3_peak_50050	chr23	14590534	14591015	+	1224	NA	promoter-TSS (ENSDART00000143675.2)	-promoter-TSS (ENSDART00000143675.2)	7	ENSDART00000143675.2	ENSDARG00000093794	#N/A	ENSDART00000143675			ENSDARG00000093794.2
CNE14_1_q0.3_peak_38735	chr2	58572971	58637717	+	1223	NA	Intergenic	Intergenic	-23681	ENSDART00000004431.9	ENSDARG00000019917	epb41l3b	ENSDART00000004431			ENSDARG00000019917.9
CNE14_1_q0.3_peak_33038	chr19	14573739	14574357	+	1223	NA	promoter-TSS (ENSDART00000022076.9)	-promoter-TSS (ENSDART00000022076.9)	50	ENSDART00000022076.9	ENSDARG00000011797	tent5bb	ENSDART00000022076			ENSDARG00000011797.9
CNE14_1_q0.3_peak_6357	chr10	45381329	45382045	+	1223	NA	Intergenic	Intergenic	-1856	ENSDART00000186205.1	ENSDARG00000109770	#N/A	ENSDART00000186205			ENSDARG00000109770.1
CNE14_1_q0.3_peak_11807	chr12	46543368	46543697	+	1222	NA	promoter-TSS (ENSDART00000167510.2)	-promoter-TSS (ENSDART00000167510.2)	-40	ENSDART00000167510.2	ENSDARG00000100583	hid1b	ENSDART00000167510			ENSDARG00000100583.2
CNE14_1_q0.3_peak_70675	chr6	39006458	39006897	+	1222	NA	promoter-TSS (ENSDART00000150885.3)	-promoter-TSS (ENSDART00000150885.3)	-228	ENSDART00000150885.3	ENSDARG00000070721	vdrb	ENSDART00000150885			ENSDARG00000070721.8
CNE14_1_q0.3_peak_40988	chr20	29565638	29565959	+	1222	NA	promoter-TSS (ENSDART00000062383.4)	-promoter-TSS (ENSDART00000062383.4)	-108	ENSDART00000062383.4	ENSDARG00000042539	ywhaqa	ENSDART00000062383			ENSDARG00000042539.4
CNE14_1_q0.3_peak_45754	chr21	45618372	45618868	+	1221	NA	Intergenic	Intergenic	-5056	ENSDART00000160324.2	ENSDARG00000099648	#N/A	ENSDART00000160324			ENSDARG00000099648.2
CNE14_1_q0.3_peak_54250	chr24	39885447	39885947	+	1221	NA	promoter-TSS (ENSDART00000143476.2)	-promoter-TSS (ENSDART00000143476.2)	88	ENSDART00000143476.2	ENSDARG00000062058	slc12a7b	ENSDART00000089232			ENSDARG00000062058.7
CNE14_1_q0.3_peak_13958	chr13	25852470	25853105	+	1221	NA	promoter-TSS (ENSDART00000132521.2)	-promoter-TSS (ENSDART00000132521.2)	-970	ENSDART00000132521.2	ENSDARG00000061352	bcl11aa	ENSDART00000087426			ENSDARG00000061352.7
CNE14_1_q0.3_peak_37819	chr2	53205274	53205718	+	1219	NA	exon (ENSDART00000163644.3, exon 1 of 2)	-exon (ENSDART00000163644.3, exon 1 of 2)	746	ENSDART00000163644.3	ENSDARG00000098702	zgc.165603	ENSDART00000163644			ENSDARG00000098702.3
CNE14_1_q0.3_peak_14282	chr13	35527224	35527930	+	1218	NA	promoter-TSS (ENSDART00000141748.2)	-promoter-TSS (ENSDART00000141748.2)	120	ENSDART00000016793.8	ENSDARG00000010823	memo1	ENSDART00000016793			ENSDARG00000010823.9
CNE14_1_q0.3_peak_17358	chr14	24936451	24936822	+	1217	NA	intron (ENSDART00000191821.1, intron 1 of 10)	-intron (ENSDART00000170871.2, intron 1 of 11)	1505	ENSDART00000170871.2	ENSDARG00000101569	ppargc1b	ENSDART00000170871			ENSDARG00000101569.2
CNE14_1_q0.3_peak_9672	chr12	850406	851022	+	1215	NA	promoter-TSS (ENSDART00000022688.7)	-promoter-TSS (ENSDART00000022688.7)	-257	ENSDART00000022688.7	ENSDARG00000021372	tob1b	ENSDART00000022688			ENSDARG00000021372.7
CNE14_1_q0.3_peak_57911	chr3	7138122	7139001	+	1215	NA	intron (ENSDART00000130027.3, intron 1 of 1)	-intron (ENSDART00000130027.3, intron 1 of 1)	-4448	ENSDART00000180849.1	ENSDARG00000115220	#N/A	ENSDART00000180849			ENSDARG00000115220.1
CNE14_1_q0.3_peak_63851	chr4	73933733	73934499	+	1214	NA	Intergenic	Intergenic	-7875	ENSDART00000130643.4	ENSDARG00000105806	si.cabz01069020.1	ENSDART00000130643			ENSDARG00000105806.2
CNE14_1_q0.3_peak_46830	chr22	13886750	13887167	+	1214	NA	promoter-TSS (ENSDART00000105711.6)	-promoter-TSS (ENSDART00000105711.6)	66	ENSDART00000105711.6	ENSDARG00000020000	sh3bp4a	ENSDART00000130585			ENSDARG00000020000.11
CNE14_1_q0.3_peak_39317	chr20	2411701	2412033	+	1214	NA	Intergenic	Intergenic	-48997	ENSDART00000131642.3	ENSDARG00000043843	#N/A	ENSDART00000131642			ENSDARG00000043843.7
CNE14_1_q0.3_peak_81383	chr9	13354952	13355267	+	1213	NA	promoter-TSS (ENSDART00000084055.6)	-promoter-TSS (ENSDART00000084055.6)	-38	ENSDART00000084055.6	ENSDARG00000060004	fzd7a	ENSDART00000084055			ENSDARG00000060004.6
CNE14_1_q0.3_peak_71187	chr6	50566901	50567305	+	1212	NA	Intergenic	Intergenic	20627	ENSDART00000151500.2	ENSDARG00000059604	mtss1	ENSDART00000151500			ENSDARG00000059604.8
CNE14_1_q0.3_peak_71197	chr6	50704510	50704926	+	1211	NA	promoter-TSS (ENSDART00000074100.4)	-promoter-TSS (ENSDART00000074100.4)	-29	ENSDART00000074100.4	ENSDARG00000052279	osgn1	ENSDART00000074100			ENSDARG00000052279.6
CNE14_1_q0.3_peak_47264	chr22	24318097	24318883	+	1210	NA	exon (ENSDART00000165618.2, exon 1 of 11)	-exon (ENSDART00000165618.2, exon 1 of 11)	359	ENSDART00000165618.2	ENSDARG00000105136	ccdc50	ENSDART00000165618			ENSDARG00000105136.2
CNE14_1_q0.3_peak_18767	chr14	52650298	52650869	+	1209	NA	Intergenic	Intergenic	-67562	ENSDART00000166924.2	ENSDARG00000098660	tstd2	ENSDART00000166924			ENSDARG00000098660.2
CNE14_1_q0.3_peak_75280	chr7	58648492	58649931	+	1209	NA	Intergenic	Intergenic	-37649	ENSDART00000052332.5	ENSDARG00000036045	penkb	ENSDART00000052332			ENSDARG00000036045.5
CNE14_1_q0.3_peak_58575	chr3	18189283	18189678	+	1209	NA	promoter-TSS (ENSDART00000049240.6)	-promoter-TSS (ENSDART00000049240.6)	-197	ENSDART00000049240.6	ENSDARG00000032619	tob1a	ENSDART00000049240			ENSDARG00000032619.6
CNE14_1_q0.3_peak_28718	chr17	51262204	51262629	+	1208	NA	promoter-TSS (ENSDART00000063738.8)	-promoter-TSS (ENSDART00000063738.8)	14	ENSDART00000163222.2	ENSDARG00000060101	trappc12	ENSDART00000163222			ENSDARG00000060101.8
CNE14_1_q0.3_peak_61300	chr4	6808926	6809542	+	1208	NA	promoter-TSS (ENSDART00000099467.4)	-promoter-TSS (ENSDART00000099467.4)	89	ENSDART00000099467.4	ENSDARG00000068708	ifrd1	ENSDART00000139242			ENSDARG00000068708.5
CNE14_1_q0.3_peak_5526	chr10	32494017	32494488	+	1207	NA	promoter-TSS (ENSDART00000028161.8)	-promoter-TSS (ENSDART00000028161.8)	52	ENSDART00000028161.8	ENSDARG00000023815	uvrag	ENSDART00000129395			ENSDARG00000023815.8
CNE14_1_q0.3_peak_49127	chr23	2789271	2789666	+	1205	NA	promoter-TSS (ENSDART00000156954.2)	-promoter-TSS (ENSDART00000156954.2)	46	ENSDART00000156954.2	ENSDARG00000038442	plcg1	ENSDART00000156954			ENSDARG00000038442.8
CNE14_1_q0.3_peak_25404	chr16	54367385	54401473	+	1205	NA	Intergenic	Intergenic	20608	ENSDART00000186928.1	ENSDARG00000038006	osr2	ENSDART00000055395			ENSDARG00000038006.6
CNE14_1_q0.3_peak_59608	chr3	49498881	49499233	+	1204	NA	intron (ENSDART00000168108.2, intron 1 of 9)	-intron (ENSDART00000168108.2, intron 1 of 9)	4966	ENSDART00000168108.2	ENSDARG00000100349	prkacaa	ENSDART00000168108			ENSDARG00000100349.2
CNE14_1_q0.3_peak_13872	chr13	23007719	23008103	+	1203	NA	promoter-TSS (ENSDART00000057638.4)	-promoter-TSS (ENSDART00000057638.4)	-98	ENSDART00000057638.4	ENSDARG00000039452	hk1	ENSDART00000057638			ENSDARG00000039452.6
CNE14_1_q0.3_peak_70706	chr6	39893383	39893710	+	1203	NA	promoter-TSS (ENSDART00000077662.6)	-promoter-TSS (ENSDART00000077662.6)	-20	ENSDART00000130613.3	ENSDARG00000008494	myl6	ENSDART00000141611			ENSDARG00000008494.11
CNE14_1_q0.3_peak_65594	chr5	14344373	14345061	+	1202	NA	promoter-TSS (ENSDART00000188456.1)	-promoter-TSS (ENSDART00000188456.1)	-70	ENSDART00000188456.1	ENSDARG00000062646	tet3	ENSDART00000188456			ENSDARG00000062646.7
CNE14_1_q0.3_peak_15248	chr13	49818914	49819274	+	1202	NA	promoter-TSS (ENSDART00000067824.7)	-promoter-TSS (ENSDART00000067824.7)	-67	ENSDART00000067824.7	ENSDARG00000046133	b3galnt2	ENSDART00000067824			ENSDARG00000046133.8
CNE14_1_q0.3_peak_21478	chr15	43398098	43398740	+	1201	NA	promoter-TSS (ENSDART00000172154.2)	-promoter-TSS (ENSDART00000172154.2)	-23	ENSDART00000172154.2	ENSDARG00000099786	actn4	ENSDART00000187688			ENSDARG00000099786.2
CNE14_1_q0.3_peak_1805	chr1	31856470	31856812	+	1201	NA	promoter-TSS (ENSDART00000065125.7)	-promoter-TSS (ENSDART00000065125.7)	0	ENSDART00000152234.2	ENSDARG00000058231	nt5c2b	ENSDART00000152234			ENSDARG00000058231.7
CNE14_1_q0.3_peak_69547	chr6	12250074	12250830	+	1200	NA	intron (ENSDART00000155685.2, intron 6 of 21)	-intron (ENSDART00000155685.2, intron 6 of 21)	288	ENSDART00000187321.1	ENSDARG00000045331	pkp4	ENSDART00000189980			ENSDARG00000045331.6
CNE14_1_q0.3_peak_23651	chr16	21620773	21621095	+	1200	NA	promoter-TSS (ENSDART00000115011.4)	-promoter-TSS (ENSDART00000115011.4)	13	ENSDART00000188856.1	ENSDARG00000078523	ddr1	ENSDART00000115011			ENSDARG00000078523.4
CNE14_1_q0.3_peak_19219	chr15	2595883	2596251	+	1200	NA	promoter-TSS (ENSDART00000114923.4)	-promoter-TSS (ENSDART00000114923.4)	58	ENSDART00000114923.4	ENSDARG00000079415	dnajc30b	ENSDART00000114923			ENSDARG00000079415.4
CNE14_1_q0.3_peak_17368	chr14	25465128	25465571	+	1200	NA	promoter-TSS (ENSDART00000173436.2)	-promoter-TSS (ENSDART00000173436.2)	3	ENSDART00000173436.2	ENSDARG00000056519	si.dkey.280e21.3	ENSDART00000173436			ENSDARG00000056519.8
CNE14_1_q0.3_peak_46911	chr22	16902506	16903119	+	1199	NA	intron (ENSDART00000090237.6, intron 3 of 10)	-intron (ENSDART00000090237.6, intron 3 of 10)	94434	ENSDART00000090242.6	ENSDARG00000062420	nfia	ENSDART00000090237			ENSDARG00000062420.7
CNE14_1_q0.3_peak_58788	chr3	24694614	24695169	+	1199	NA	Intergenic	Intergenic	13036	ENSDART00000170809.2	ENSDARG00000061684	slc25a17	ENSDART00000170809			ENSDARG00000061684.5
CNE14_1_q0.3_peak_69343	chr6	7686061	7686782	+	1199	NA	exon (ENSDART00000091836.6, exon 1 of 16)	-exon (ENSDART00000091836.6, exon 1 of 16)	173	ENSDART00000091836.6	ENSDARG00000063062	ubn2a	ENSDART00000091836			ENSDARG00000063062.7
CNE14_1_q0.3_peak_47114	chr22	22164285	22164596	+	1197	NA	promoter-TSS (ENSDART00000183840.1)	-promoter-TSS (ENSDART00000183840.1)	-102	ENSDART00000183840.1	ENSDARG00000069708	cdc34a	ENSDART00000183840			ENSDARG00000069708.7
CNE14_1_q0.3_peak_52318	chr24	6647755	6648084	+	1197	NA	promoter-TSS (ENSDART00000161494.2)	-promoter-TSS (ENSDART00000161494.2)	-644	ENSDART00000161494.2	ENSDARG00000104295	arhgap21a	ENSDART00000167391			ENSDARG00000104295.2
CNE14_1_q0.3_peak_74941	chr7	51433733	51434061	+	1197	NA	promoter-TSS (ENSDART00000083189.6)	-promoter-TSS (ENSDART00000083189.6)	6	ENSDART00000083189.6	ENSDARG00000059672	arhgap36	ENSDART00000083189			ENSDARG00000059672.8
CNE14_1_q0.3_peak_66702	chr5	43457722	43458241	+	1193	NA	promoter-TSS (ENSDART00000051114.8)	-promoter-TSS (ENSDART00000051114.8)	-323	ENSDART00000051114.8	ENSDARG00000016868	rhobtb4	ENSDART00000051114			ENSDARG00000016868.11
CNE14_1_q0.3_peak_83613	chr9	54639937	54641575	+	1193	NA	intron (ENSDART00000067544.7, intron 1 of 12)	-intron (ENSDART00000067544.7, intron 1 of 12)	-3870	ENSDART00000190609.1	ENSDARG00000045958	egfl6	ENSDART00000167769			ENSDARG00000045958.7
CNE14_1_q0.3_peak_59248	chr3	37699331	37700146	+	1192	NA	intron (ENSDART00000151369.2, intron 1 of 2)	-intron (ENSDART00000151193.3, intron 1 of 7)	213	ENSDART00000151810.2	ENSDARG00000059768	gpatch8	ENSDART00000151369			ENSDARG00000059768.8
CNE14_1_q0.3_peak_84441	chrKN150342.1	18109	23453	+	1192	NA	NA	NA	NA	NA
CNE14_1_q0.3_peak_38773	chr2	58902014	58902826	+	1192	NA	promoter-TSS (ENSDART00000061638.6)	-promoter-TSS (ENSDART00000061638.6)	57	ENSDART00000061638.6	ENSDARG00000042056	mau2	ENSDART00000183362			ENSDARG00000042056.8
CNE14_1_q0.3_peak_19382	chr15	3736321	3736900	+	1191	NA	promoter-TSS (ENSDART00000182986.1)	-promoter-TSS (ENSDART00000182986.1)	163	ENSDART00000090624.5	ENSDARG00000062552	lpar6a	ENSDART00000090624			ENSDARG00000062552.5
CNE14_1_q0.3_peak_18586	chr14	50924731	50926832	+	1191	NA	intron (ENSDART00000146918.2, intron 1 of 10)	-intron (ENSDART00000146918.2, intron 1 of 10)	7012	ENSDART00000146918.2	ENSDARG00000068582	rnf44	ENSDART00000146918			ENSDARG00000068582.7
CNE14_1_q0.3_peak_43390	chr21	3897406	3898216	+	1191	NA	intron (ENSDART00000170653.3, intron 1 of 7)	-intron (ENSDART00000170653.3, intron 1 of 7)	131	ENSDART00000170653.3	ENSDARG00000036915	dolpp1	ENSDART00000170653			ENSDARG00000036915.8
CNE14_1_q0.3_peak_46488	chr22	5713638	5714057	+	1190	NA	promoter-TSS (ENSDART00000138507.2)	-promoter-TSS (ENSDART00000138507.2)	-54	ENSDART00000138507.2	ENSDARG00000077631	#N/A	ENSDART00000138507			ENSDARG00000077631.5
CNE14_1_q0.3_peak_71949	chr6	57740913	57741439	+	1189	NA	exon (ENSDART00000169175.2, exon 1 of 6)	-exon (ENSDART00000169175.2, exon 1 of 6)	137	ENSDART00000169175.2	ENSDARG00000098420	snta1	ENSDART00000169175			ENSDARG00000098420.3
CNE14_1_q0.3_peak_42350	chr20	51831325	51831832	+	1189	NA	promoter-TSS (ENSDART00000165076.2)	-promoter-TSS (ENSDART00000165076.2)	79	ENSDART00000165076.2	ENSDARG00000008184	mia3	ENSDART00000060505			ENSDARG00000008184.11
CNE14_1_q0.3_peak_26645	chr17	8985026	8985563	+	1189	NA	Intergenic	Intergenic	-3080	ENSDART00000109573.3	ENSDARG00000077295	akap6	ENSDART00000186901			ENSDARG00000077295.6
CNE14_1_q0.3_peak_36920	chr2	37826489	37826986	+	1188	NA	promoter-TSS (ENSDART00000121768.2)	-promoter-TSS (ENSDART00000121768.2)	1	ENSDART00000121768.2	ENSDARG00000089617	rpph1	ENSDART00000121768			ENSDARG00000089617.2
CNE14_1_q0.3_peak_67082	chr5	51226750	51227491	+	1188	NA	promoter-TSS (ENSDART00000083340.5)	-promoter-TSS (ENSDART00000083340.5)	-27	ENSDART00000083340.5	ENSDARG00000059722	ubac1	ENSDART00000083340			ENSDARG00000059722.6
CNE14_1_q0.3_peak_17856	chr14	38715329	38715774	+	1188	NA	promoter-TSS (ENSDART00000194758.1)	-promoter-TSS (ENSDART00000194758.1)	-122	ENSDART00000194758.1	ENSDARG00000117253	#N/A	ENSDART00000194758			ENSDARG00000117253.1
CNE14_1_q0.3_peak_78869	chr8	41533061	41533780	+	1188	NA	exon (ENSDART00000142377.2, exon 1 of 6)	-exon (ENSDART00000142377.2, exon 1 of 6)	152	ENSDART00000142377.2	ENSDARG00000078536	si.ch211.158d24.2	ENSDART00000142377			ENSDARG00000078536.5
CNE14_1_q0.3_peak_6294	chr10	44322947	44323446	+	1188	NA	intron (ENSDART00000160231.2, intron 17 of 31)	-intron (ENSDART00000160231.2, intron 17 of 31)	-16560	ENSDART00000191068.1	ENSDARG00000115248	cdk2ap1	ENSDART00000191068			ENSDARG00000115248.1
CNE14_1_q0.3_peak_32025	chr18	49940750	49941241	+	1186	NA	Intergenic	Intergenic	-28573	ENSDART00000126916.5	ENSDARG00000012005	mob2b	ENSDART00000126916			ENSDARG00000012005.13
CNE14_1_q0.3_peak_57905	chr3	7094960	7097021	+	1186	NA	intron (ENSDART00000158652.2, intron 1 of 2)	-intron (ENSDART00000158652.2, intron 1 of 2)	10688	ENSDART00000158652.2	ENSDARG00000098122	#N/A	ENSDART00000158652			ENSDARG00000098122.2
CNE14_1_q0.3_peak_1802	chr1	31724974	31725395	+	1185	NA	promoter-TSS (ENSDART00000112333.6)	-promoter-TSS (ENSDART00000112333.6)	30	ENSDART00000112333.6	ENSDARG00000078733	cnnm2b	ENSDART00000189801			ENSDARG00000078733.6
CNE14_1_q0.3_peak_46541	chr22	6651101	6651693	+	1184	NA	promoter-TSS (ENSDART00000124308.3)	-promoter-TSS (ENSDART00000124308.3)	-15	ENSDART00000124308.3	ENSDARG00000090847	si.ch211.209l18.4	ENSDART00000124308			ENSDARG00000090847.4
CNE14_1_q0.3_peak_65933	chr5	22028649	22028972	+	1183	NA	exon (ENSDART00000002938.7, exon 14 of 14)	-exon (ENSDART00000002938.7, exon 14 of 14)	-1453	ENSDART00000023306.8	ENSDARG00000017086	asb12a	ENSDART00000023306			ENSDARG00000017086.10
CNE14_1_q0.3_peak_64115	chr4	77551624	77566861	+	1183	NA	Intergenic	Intergenic	1568	ENSDART00000119029.2	ENSDARG00000081218	#N/A	ENSDART00000119029			ENSDARG00000081218.2
CNE14_1_q0.3_peak_69606	chr6	13716092	13716549	+	1182	NA	exon (ENSDART00000111102.5, exon 1 of 4)	-exon (ENSDART00000111102.5, exon 1 of 4)	424	ENSDART00000111102.5	ENSDARG00000078037	chpfb	ENSDART00000151771			ENSDARG00000078037.6
CNE14_1_q0.3_peak_70758	chr6	41555078	41555456	+	1182	NA	promoter-TSS (ENSDART00000084834.6)	-promoter-TSS (ENSDART00000084834.6)	20	ENSDART00000084834.6	ENSDARG00000060309	srgap3	ENSDART00000084834			ENSDARG00000060309.7
CNE14_1_q0.3_peak_21069	chr15	37543103	37543727	+	1181	NA	exon (ENSDART00000148870.3, exon 1 of 37)	-exon (ENSDART00000148870.3, exon 1 of 37)	176	ENSDART00000180400.1	ENSDARG00000060697	kmt2bb	ENSDART00000180400			ENSDARG00000060697.10
CNE14_1_q0.3_peak_66198	chr5	30535030	30535615	+	1181	NA	promoter-TSS (ENSDART00000040328.4)	-promoter-TSS (ENSDART00000040328.4)	5	ENSDART00000040328.4	ENSDARG00000029406	h2ax	ENSDART00000040328			ENSDARG00000029406.4
CNE14_1_q0.3_peak_2162	chr1	36996552	36996971	+	1181	NA	intron (ENSDART00000172111.2, intron 3 of 8)	-intron (ENSDART00000160637.2, intron 1 of 6)	3746	ENSDART00000160637.2	ENSDARG00000102082	nr3c2	ENSDART00000172111			ENSDARG00000102082.2
CNE14_1_q0.3_peak_17454	chr14	28001760	28002193	+	1181	NA	promoter-TSS (ENSDART00000054115.5)	-promoter-TSS (ENSDART00000054115.5)	10	ENSDART00000054115.5	ENSDARG00000075666	tsc22d3.1	ENSDART00000054115			ENSDARG00000075666.4
CNE14_1_q0.3_peak_73879	chr7	21751939	21752253	+	1179	NA	promoter-TSS (ENSDART00000173641.2)	-promoter-TSS (ENSDART00000173641.2)	-72	ENSDART00000173641.2	ENSDARG00000088087	kdm6ba	ENSDART00000127719			ENSDARG00000088087.4
CNE14_1_q0.3_peak_37682	chr2	51818041	51818725	+	1179	NA	exon (ENSDART00000170353.3, exon 1 of 11)	-exon (ENSDART00000170353.3, exon 1 of 11)	344	ENSDART00000170353.3	ENSDARG00000103108	LOC100331938	ENSDART00000170353			ENSDARG00000103108.3
CNE14_1_q0.3_peak_65736	chr5	17319942	17320371	+	1178	NA	Intergenic	Intergenic	-278868	ENSDART00000141025.2	ENSDARG00000095235	#N/A	ENSDART00000141025			ENSDARG00000095235.2
CNE14_1_q0.3_peak_78865	chr8	41453595	41454054	+	1178	NA	exon (ENSDART00000061144.6, exon 1 of 4)	-exon (ENSDART00000061144.6, exon 1 of 4)	133	ENSDART00000061144.6	ENSDARG00000041720	arpc5la	ENSDART00000061144			ENSDARG00000041720.7
CNE14_1_q0.3_peak_36566	chr2	27490841	27491319	+	1178	NA	promoter-TSS (ENSDART00000078305.6)	-promoter-TSS (ENSDART00000078305.6)	14	ENSDART00000078305.6	ENSDARG00000055900	zswim5	ENSDART00000078305			ENSDARG00000055900.6
CNE14_1_q0.3_peak_79000	chr8	44384504	44388861	+	1177	NA	Intergenic	Intergenic	-8272	ENSDART00000098138.4	ENSDARG00000041705	si.busm1.228j01.6	ENSDART00000158784			ENSDARG00000041705.7
CNE14_1_q0.3_peak_69398	chr6	8165878	8166301	+	1176	NA	Intergenic	Intergenic	-6138	ENSDART00000146106.2	ENSDARG00000094965	nfil3.5	ENSDART00000193308			ENSDARG00000094965.2
CNE14_1_q0.3_peak_25376	chr16	54156958	54158101	+	1176	NA	Intergenic	Intergenic	29845	ENSDART00000186989.1	ENSDARG00000113801	LOC101886260	ENSDART00000186989			ENSDARG00000113801.1
CNE14_1_q0.3_peak_36203	chr2	16710749	16711119	+	1176	NA	promoter-TSS (ENSDART00000017852.6)	-promoter-TSS (ENSDART00000017852.6)	45	ENSDART00000017852.6	ENSDARG00000009436	ubxn7	ENSDART00000171666			ENSDARG00000009436.6
CNE14_1_q0.3_peak_18357	chr14	48960042	48960647	+	1175	NA	exon (ENSDART00000165514.2, exon 1 of 4)	-exon (ENSDART00000165514.2, exon 1 of 4)	266	ENSDART00000165514.2	ENSDARG00000071336	mif	ENSDART00000105427			ENSDARG00000071336.5
CNE14_1_q0.3_peak_5215	chr10	22831424	22832043	+	1175	NA	promoter-TSS (ENSDART00000133726.2)	-promoter-TSS (ENSDART00000133726.2)	-122	ENSDART00000160115.3	ENSDARG00000056885	per1a	ENSDART00000160115			ENSDARG00000056885.8
CNE14_1_q0.3_peak_40926	chr20	26987249	26987601	+	1175	NA	promoter-TSS (ENSDART00000012816.10)	-promoter-TSS (ENSDART00000012816.10)	9	ENSDART00000012816.10	ENSDARG00000004581	sel1l	ENSDART00000012816			ENSDARG00000004581.10
CNE14_1_q0.3_peak_66271	chr5	32546048	32546560	+	1175	NA	Intergenic	Intergenic	-41024	ENSDART00000187597.1	ENSDARG00000022399	ntmt1	ENSDART00000034705			ENSDARG00000022399.7
CNE14_1_q0.3_peak_2910	chr1	54947570	54948301	+	1174	NA	promoter-TSS (ENSDART00000129710.4)	-promoter-TSS (ENSDART00000129710.4)	-124	ENSDART00000152528.2	ENSDARG00000089243	r3hcc1l	ENSDART00000182944			ENSDARG00000089243.4
CNE14_1_q0.3_peak_80423	chr9	1325625	1331582	+	1174	NA	intron (ENSDART00000191361.1, intron 1 of 10)	-intron (ENSDART00000191361.1, intron 1 of 10)	2899	ENSDART00000180315.1	ENSDARG00000109433	#N/A	ENSDART00000180315			ENSDARG00000109433.1
CNE14_1_q0.3_peak_23794	chr16	26131876	26132400	+	1172	NA	promoter-TSS (ENSDART00000157787.2)	-promoter-TSS (ENSDART00000157787.2)	-16	ENSDART00000157787.2	ENSDARG00000101145	lipeb	ENSDART00000157787			ENSDARG00000101145.3
CNE14_1_q0.3_peak_44527	chr21	30470737	30471262	+	1172	NA	promoter-TSS (ENSDART00000133478.3)	-promoter-TSS (ENSDART00000133478.3)	36	ENSDART00000147375.2	ENSDARG00000019060	snx12	ENSDART00000126678			ENSDARG00000019060.11
CNE14_1_q0.3_peak_36538	chr2	26498402	26498816	+	1171	NA	promoter-TSS (ENSDART00000131292.3)	-promoter-TSS (ENSDART00000131292.3)	47	ENSDART00000148010.2	ENSDARG00000055996	rps8a	ENSDART00000148010			ENSDARG00000055996.6
CNE14_1_q0.3_peak_53186	chr24	21973442	21973979	+	1170	NA	promoter-TSS (ENSDART00000030592.4)	-promoter-TSS (ENSDART00000030592.4)	-219	ENSDART00000042495.6	ENSDARG00000032272	sat1b	ENSDART00000042495			ENSDARG00000032272.6
CNE14_1_q0.3_peak_60395	chr3	58230811	58231393	+	1170	NA	promoter-TSS (ENSDART00000126505.2)	-promoter-TSS (ENSDART00000126505.2)	-458	ENSDART00000126505.2	ENSDARG00000088258	mosmoa	ENSDART00000126505			ENSDARG00000088258.2
CNE14_1_q0.3_peak_1801	chr1	31674140	31674948	+	1169	NA	exon (ENSDART00000044214.6, exon 1 of 4)	-exon (ENSDART00000044214.6, exon 1 of 4)	247	ENSDART00000044214.6	ENSDARG00000029751	wbp1lb	ENSDART00000044214			ENSDARG00000029751.6
CNE14_1_q0.3_peak_2250	chr1	39983552	39983903	+	1169	NA	promoter-TSS (ENSDART00000160066.2)	-promoter-TSS (ENSDART00000160066.2)	3	ENSDART00000160066.2	ENSDARG00000104907	ing2	ENSDART00000160066			ENSDARG00000104907.2
CNE14_1_q0.3_peak_66450	chr5	36329413	36329784	+	1168	NA	promoter-TSS (ENSDART00000011399.5)	-promoter-TSS (ENSDART00000011399.5)	-910	ENSDART00000011399.5	ENSDARG00000007723	efnb1	ENSDART00000011399			ENSDARG00000007723.6
CNE14_1_q0.3_peak_47530	chr22	30046842	30047473	+	1167	NA	promoter-TSS (ENSDART00000040538.8)	-promoter-TSS (ENSDART00000040538.8)	-88	ENSDART00000142857.3	ENSDARG00000040874	add3a	ENSDART00000142857			ENSDARG00000040874.9
CNE14_1_q0.3_peak_30435	chr18	27904350	27904797	+	1166	NA	promoter-TSS (ENSDART00000142336.2)	-promoter-TSS (ENSDART00000142336.2)	58	ENSDART00000142336.2	ENSDARG00000062082	hipk3b	ENSDART00000191835			ENSDARG00000062082.8
CNE14_1_q0.3_peak_82138	chr9	29497700	29498047	+	1166	NA	promoter-TSS (ENSDART00000060246.4)	-promoter-TSS (ENSDART00000060246.4)	40	ENSDART00000132672.2	ENSDARG00000041110	dnajc3a	ENSDART00000132672			ENSDARG00000041110.4
CNE14_1_q0.3_peak_75283	chr7	58729600	58730206	+	1165	NA	promoter-TSS (ENSDART00000073640.2)	-promoter-TSS (ENSDART00000073640.2)	-9	ENSDART00000149347.2	ENSDARG00000068156	chchd7	ENSDART00000149347			ENSDARG00000068156.6
CNE14_1_q0.3_peak_2646	chr1	50992623	50993030	+	1165	NA	Intergenic	Intergenic	-4330	ENSDART00000010449.8	ENSDARG00000005578	ugp2a	ENSDART00000010449			ENSDARG00000005578.8
CNE14_1_q0.3_peak_38463	chr2	57148852	57149217	+	1164	NA	promoter-TSS (ENSDART00000168497.2)	-promoter-TSS (ENSDART00000168497.2)	32	ENSDART00000168497.2	ENSDARG00000100371	eef2b	ENSDART00000168497			ENSDARG00000100371.3
CNE14_1_q0.3_peak_15324	chr13	50366566	50366906	+	1164	NA	exon (ENSDART00000098209.5, exon 1 of 9)	-exon (ENSDART00000098209.5, exon 1 of 9)	214	ENSDART00000098209.5	ENSDARG00000068064	sirt1	ENSDART00000098209			ENSDARG00000068064.5
CNE14_1_q0.3_peak_48660	chr23	73066	74598	+	1164	NA	Intergenic	Intergenic	-35778	ENSDART00000170393.2	ENSDARG00000105179	#N/A	ENSDART00000170393			ENSDARG00000105179.2
CNE14_1_q0.3_peak_31899	chr18	49225202	49225628	+	1163	NA	promoter-TSS (ENSDART00000135026.4)	-promoter-TSS (ENSDART00000135026.4)	-137	ENSDART00000135026.4	ENSDARG00000060927	si.ch211.136a13.1	ENSDART00000135026			ENSDARG00000060927.9
CNE14_1_q0.3_peak_81792	chr9	21488702	21489088	+	1163	NA	promoter-TSS (ENSDART00000080404.6)	-promoter-TSS (ENSDART00000080404.6)	81	ENSDART00000080404.6	ENSDARG00000005576	mphosph8	ENSDART00000080404			ENSDARG00000005576.11
CNE14_1_q0.3_peak_26247	chr17	4489277	4489744	+	1162	NA	Intergenic	Intergenic	62047	ENSDART00000131593.3	ENSDARG00000094606	#N/A	ENSDART00000131593			ENSDARG00000094606.4
CNE14_1_q0.3_peak_70517	chr6	34512144	34512603	+	1161	NA	promoter-TSS (ENSDART00000102554.6)	-promoter-TSS (ENSDART00000102554.6)	60	ENSDART00000102554.6	ENSDARG00000070074	lrp8	ENSDART00000102554			ENSDARG00000070074.7
CNE14_1_q0.3_peak_72381	chr6	60111996	60112394	+	1161	NA	promoter-TSS (ENSDART00000008243.8)	-promoter-TSS (ENSDART00000008243.8)	-5	ENSDART00000008243.8	ENSDARG00000009505	prelid3b	ENSDART00000008243			ENSDARG00000009505.8
CNE14_1_q0.3_peak_60852	chr3	61336690	61337079	+	1161	NA	promoter-TSS (ENSDART00000155414.2)	-promoter-TSS (ENSDART00000155414.2)	-43	ENSDART00000155414.2	ENSDARG00000074086	tecpr1b	ENSDART00000155414			ENSDARG00000074086.5
CNE14_1_q0.3_peak_9637	chr12	695287	695708	+	1159	NA	promoter-TSS (ENSDART00000161691.2)	-promoter-TSS (ENSDART00000161691.2)	-122	ENSDART00000161691.2	ENSDARG00000096662	abcc3	ENSDART00000161691			ENSDARG00000096662.5
CNE14_1_q0.3_peak_35034	chr2	1331345	1331680	+	1157	NA	Intergenic	Intergenic	33166	ENSDART00000164674.2	ENSDARG00000002970	ss18	ENSDART00000011919			ENSDARG00000002970.10
CNE14_1_q0.3_peak_81936	chr9	24125836	24126331	+	1157	NA	promoter-TSS (ENSDART00000132045.2)	-promoter-TSS (ENSDART00000132045.2)	-140	ENSDART00000132045.2	ENSDARG00000062465	pgap1	ENSDART00000132045			ENSDARG00000062465.7
CNE14_1_q0.3_peak_53584	chr24	32664578	32665068	+	1157	NA	exon (ENSDART00000038364.9, exon 1 of 7)	-exon (ENSDART00000038364.9, exon 1 of 7)	460	ENSDART00000038364.9	ENSDARG00000014488	ca2	ENSDART00000038364			ENSDARG00000014488.10
CNE14_1_q0.3_peak_66179	chr5	29850787	29851281	+	1157	NA	promoter-TSS (ENSDART00000143434.2)	-promoter-TSS (ENSDART00000143434.2)	-399	ENSDART00000143434.2	ENSDARG00000061243	ubash3ba	ENSDART00000143434			ENSDARG00000061243.6
CNE14_1_q0.3_peak_23751	chr16	24832004	24832345	+	1157	NA	promoter-TSS (ENSDART00000153731.2)	-promoter-TSS (ENSDART00000153731.2)	-136	ENSDART00000153731.2	ENSDARG00000040284	si.dkey.79d12.5	ENSDART00000153731			ENSDARG00000040284.6
CNE14_1_q0.3_peak_45767	chr21	45685497	45685922	+	1156	NA	promoter-TSS (ENSDART00000160530.2)	-promoter-TSS (ENSDART00000160530.2)	-48	ENSDART00000160530.2	ENSDARG00000104375	sec24a	ENSDART00000160530			ENSDARG00000104375.2
CNE14_1_q0.3_peak_49274	chr23	4022442	4022919	+	1154	NA	promoter-TSS (ENSDART00000055099.6)	-promoter-TSS (ENSDART00000055099.6)	60	ENSDART00000055099.6	ENSDARG00000037815	b4galt5	ENSDART00000055099			ENSDARG00000037815.8
CNE14_1_q0.3_peak_62536	chr4	41002840	41743231	+	1154	NA	Intergenic	Intergenic	7026	ENSDART00000119831.2	ENSDARG00000084431	#N/A	ENSDART00000119831			ENSDARG00000084431.2
CNE14_1_q0.3_peak_47227	chr22	23546723	23547074	+	1153	NA	promoter-TSS (ENSDART00000157940.2)	-promoter-TSS (ENSDART00000157940.2)	-28	ENSDART00000157940.2	ENSDARG00000103754	aspm	ENSDART00000157940			ENSDARG00000103754.2
CNE14_1_q0.3_peak_24851	chr16	50229071	50229591	+	1153	NA	promoter-TSS (ENSDART00000010081.9)	-promoter-TSS (ENSDART00000010081.9)	-57	ENSDART00000010081.9	ENSDARG00000009250	etfb	ENSDART00000161782			ENSDARG00000009250.10
CNE14_1_q0.3_peak_14335	chr13	37465518	37466253	+	1152	NA	promoter-TSS (ENSDART00000100324.6)	-promoter-TSS (ENSDART00000100324.6)	-343	ENSDART00000147336.2	ENSDARG00000069118	ppp2r5eb	ENSDART00000100324			ENSDARG00000069118.7
CNE14_1_q0.3_peak_43855	chr21	9575880	9576395	+	1152	NA	promoter-TSS (ENSDART00000159899.2)	-promoter-TSS (ENSDART00000159899.2)	-39	ENSDART00000161289.2	ENSDARG00000102730	mapk10	ENSDART00000165132			ENSDARG00000102730.2
CNE14_1_q0.3_peak_69332	chr6	7321851	7322704	+	1152	NA	promoter-TSS (ENSDART00000065500.5)	-promoter-TSS (ENSDART00000065500.5)	-84	ENSDART00000151705.3	ENSDARG00000096429	#N/A	ENSDART00000151705			ENSDARG00000096429.3
CNE14_1_q0.3_peak_2237	chr1	39552654	39553001	+	1150	NA	promoter-TSS (ENSDART00000137676.3)	-promoter-TSS (ENSDART00000137676.3)	-213	ENSDART00000137676.3	ENSDARG00000005479	tenm3	ENSDART00000144455			ENSDARG00000005479.13
CNE14_1_q0.3_peak_55902	chr25	21893989	21894386	+	1150	NA	promoter-TSS (ENSDART00000152075.2)	-promoter-TSS (ENSDART00000152075.2)	130	ENSDART00000089642.6	ENSDARG00000062195	fbxo31	ENSDART00000189158			ENSDARG00000062195.6
CNE14_1_q0.3_peak_35399	chr2	5135028	5135391	+	1149	NA	promoter-TSS (ENSDART00000164039.2)	-promoter-TSS (ENSDART00000164039.2)	-84	ENSDART00000164039.2	ENSDARG00000101766	ptmab	ENSDART00000164039			ENSDARG00000101766.2
CNE14_1_q0.3_peak_79383	chr8	49935021	49935577	+	1149	NA	promoter-TSS (ENSDART00000156841.2)	-promoter-TSS (ENSDART00000156841.2)	59	ENSDART00000159782.3	ENSDARG00000105214	agtpbp1	ENSDART00000172642			ENSDARG00000105214.3
CNE14_1_q0.3_peak_69726	chr6	16717453	16718023	+	1149	NA	exon (ENSDART00000153552.2, exon 1 of 31)	-exon (ENSDART00000153552.2, exon 1 of 31)	140	ENSDART00000153552.2	ENSDARG00000078592	nomo	ENSDART00000153552			ENSDARG00000078592.5
CNE14_1_q0.3_peak_18037	chr14	43585827	43586226	+	1148	NA	promoter-TSS (ENSDART00000173396.2)	-promoter-TSS (ENSDART00000173396.2)	85	ENSDART00000173396.2	ENSDARG00000077012	eif4ea	ENSDART00000173396			ENSDARG00000077012.4
CNE14_1_q0.3_peak_33928	chr19	37135590	37135958	+	1148	NA	promoter-TSS (ENSDART00000103159.4)	-promoter-TSS (ENSDART00000103159.4)	74	ENSDART00000103159.4	ENSDARG00000070358	smim12	ENSDART00000103159			ENSDARG00000070358.4
CNE14_1_q0.3_peak_27696	chr17	39184618	39185148	+	1148	NA	exon (ENSDART00000050534.6, exon 1 of 17)	-exon (ENSDART00000050534.6, exon 1 of 17)	453	ENSDART00000050534.6	ENSDARG00000029668	crim1	ENSDART00000050534			ENSDARG00000029668.7
CNE14_1_q0.3_peak_1196	chr1	18614979	18615373	+	1148	NA	promoter-TSS (ENSDART00000014916.8)	-promoter-TSS (ENSDART00000014916.8)	-113	ENSDART00000014916.8	ENSDARG00000015495	klf3	ENSDART00000014916			ENSDARG00000015495.9
CNE14_1_q0.3_peak_10762	chr12	22559600	22560436	+	1147	NA	promoter-TSS (ENSDART00000172066.2)	-promoter-TSS (ENSDART00000172066.2)	-49	ENSDART00000172066.2	ENSDARG00000099966	polr2a	ENSDART00000172066			ENSDARG00000099966.2
CNE14_1_q0.3_peak_81889	chr9	22631590	22632347	+	1147	NA	promoter-TSS (ENSDART00000139434.2)	-promoter-TSS (ENSDART00000139434.2)	115	ENSDART00000145005.3	ENSDARG00000069763	etv5a	ENSDART00000181822			ENSDARG00000069763.6
CNE14_1_q0.3_peak_19476	chr15	4313787	4314235	+	1147	NA	promoter-TSS (ENSDART00000170562.2)	-promoter-TSS (ENSDART00000170562.2)	31	ENSDART00000173311.2	ENSDARG00000102142	ece2b	ENSDART00000173311			ENSDARG00000102142.2
CNE14_1_q0.3_peak_59528	chr3	47130717	47131071	+	1146	NA	promoter-TSS (ENSDART00000024031.11)	-promoter-TSS (ENSDART00000024031.11)	-18	ENSDART00000165940.2	ENSDARG00000069937	dnm2a	ENSDART00000024031			ENSDARG00000069937.7
CNE14_1_q0.3_peak_2724	chr1	52137485	52137896	+	1145	NA	TTS (ENSDART00000018817.6)	-TTS (ENSDART00000018817.6)	109	ENSDART00000074265.6	ENSDARG00000018190	get3	ENSDART00000074265			ENSDARG00000018190.10
CNE14_1_q0.3_peak_44954	chr21	38717361	38718026	+	1143	NA	exon (ENSDART00000065169.6, exon 1 of 2)	-exon (ENSDART00000065169.6, exon 1 of 2)	161	ENSDART00000065169.6	ENSDARG00000044381	siah2l	ENSDART00000065169			ENSDARG00000044381.8
CNE14_1_q0.3_peak_67470	chr5	59115975	59116520	+	1143	NA	exon (ENSDART00000154978.2, exon 1 of 4)	-exon (ENSDART00000154978.2, exon 1 of 4)	179	ENSDART00000154978.2	ENSDARG00000097055	si.ch211.284f22.3	ENSDART00000154978			ENSDARG00000097055.2
CNE14_1_q0.3_peak_49216	chr23	3764728	3765237	+	1142	NA	Intergenic	Intergenic	-5290	ENSDART00000028885.9	ENSDARG00000028335	hmga1a	ENSDART00000137826			ENSDARG00000028335.9
CNE14_1_q0.3_peak_73971	chr7	24729385	24729785	+	1142	NA	promoter-TSS (ENSDART00000111542.5)	-promoter-TSS (ENSDART00000111542.5)	4	ENSDART00000170100.3	ENSDARG00000079900	shroom4	ENSDART00000170100			ENSDARG00000079900.6
CNE14_1_q0.3_peak_42707	chr20	54574090	54574536	+	1142	NA	Intergenic	Intergenic	-10295	ENSDART00000099832.4	ENSDARG00000068912	zgc.153012	ENSDART00000099832			ENSDARG00000068912.4
CNE14_1_q0.3_peak_12204	chr13	226091	226408	+	1142	NA	promoter-TSS (ENSDART00000158208.2)	-promoter-TSS (ENSDART00000158208.2)	-140	ENSDART00000158208.2	ENSDARG00000104347	rtn4b	ENSDART00000161705			ENSDARG00000104347.2
CNE14_1_q0.3_peak_70166	chr6	23809126	23809578	+	1142	NA	promoter-TSS (ENSDART00000159514.2)	-promoter-TSS (ENSDART00000159514.2)	-149	ENSDART00000168701.2	ENSDARG00000100003	glulb	ENSDART00000159514			ENSDARG00000100003.2
CNE14_1_q0.3_peak_29205	chr18	619438	619884	+	1141	NA	promoter-TSS (ENSDART00000159846.2)	-promoter-TSS (ENSDART00000159846.2)	42	ENSDART00000159846.2	ENSDARG00000100044	LOC108179070	ENSDART00000189667			ENSDARG00000100044.2
CNE14_1_q0.3_peak_50801	chr23	27827871	27833901	+	1141	NA	Intergenic	Intergenic	-7966	ENSDART00000023094.9	ENSDARG00000018968	acvr1ba	ENSDART00000023094			ENSDARG00000018968.9
CNE14_1_q0.3_peak_34199	chr19	42928865	42929278	+	1140	NA	promoter-TSS (ENSDART00000086659.6)	-promoter-TSS (ENSDART00000086659.6)	-92	ENSDART00000086659.6	ENSDARG00000061057	cyhr1	ENSDART00000124304			ENSDARG00000061057.7
CNE14_1_q0.3_peak_44191	chr21	21263811	21264248	+	1140	NA	promoter-TSS (ENSDART00000089651.7)	-promoter-TSS (ENSDART00000089651.7)	41	ENSDART00000089651.7	ENSDARG00000062307	ccdc61	ENSDART00000089651			ENSDARG00000062307.7
CNE14_1_q0.3_peak_2941	chr1	55210238	55210933	+	1140	NA	promoter-TSS (ENSDART00000111671.3)	-promoter-TSS (ENSDART00000111671.3)	34	ENSDART00000111671.3	ENSDARG00000075754	mri1	ENSDART00000140153			ENSDARG00000075754.5
CNE14_1_q0.3_peak_79122	chr8	46385951	46386597	+	1140	NA	promoter-TSS (ENSDART00000060919.6)	-promoter-TSS (ENSDART00000060919.6)	-214	ENSDART00000060919.6	ENSDARG00000010316	qars1	ENSDART00000136602			ENSDARG00000010316.10
CNE14_1_q0.3_peak_12242	chr13	638282	638878	+	1140	NA	promoter-TSS (ENSDART00000066080.6)	-promoter-TSS (ENSDART00000066080.6)	-95	ENSDART00000128969.3	ENSDARG00000044954	slit1a	ENSDART00000128969			ENSDARG00000044954.8
CNE14_1_q0.3_peak_58593	chr3	18755642	18756312	+	1140	NA	promoter-TSS (ENSDART00000055766.6)	-promoter-TSS (ENSDART00000055766.6)	99	ENSDART00000055766.6	ENSDARG00000038242	zgc.113333	ENSDART00000055766			ENSDARG00000038242.7
CNE14_1_q0.3_peak_11175	chr12	34827408	34827861	+	1139	NA	promoter-TSS (ENSDART00000105533.5)	-promoter-TSS (ENSDART00000105533.5)	-157	ENSDART00000153026.2	ENSDARG00000096749	si.dkey.21c1.6	ENSDART00000153026			ENSDARG00000096749.2
CNE14_1_q0.3_peak_10244	chr12	8486216	8486576	+	1139	NA	promoter-TSS (ENSDART00000062855.5)	-promoter-TSS (ENSDART00000062855.5)	-66	ENSDART00000062855.5	ENSDARG00000042826	egr2b	ENSDART00000062855			ENSDARG00000042826.5
CNE14_1_q0.3_peak_1924	chr1	33357130	33357449	+	1139	NA	intron (ENSDART00000141347.2, intron 12 of 13)	-intron (ENSDART00000136383.3, intron 13 of 14)	-3511	ENSDART00000041191.6	ENSDARG00000033380	gyg2	ENSDART00000041191			ENSDARG00000033380.7
CNE14_1_q0.3_peak_73831	chr7	20796889	20797443	+	1139	NA	promoter-TSS (ENSDART00000162357.2)	-promoter-TSS (ENSDART00000162357.2)	-231	ENSDART00000162357.2	ENSDARG00000017874	dnajc3b	ENSDART00000162357			ENSDARG00000017874.11
CNE14_1_q0.3_peak_39997	chr20	6612913	6613493	+	1138	NA	intron (ENSDART00000136567.3, intron 3 of 15)	-intron (ENSDART00000136567.3, intron 3 of 15)	-17337	ENSDART00000138361.2	ENSDARG00000031911	si.ch211.191a24.3	ENSDART00000135390			ENSDARG00000031911.7
CNE14_1_q0.3_peak_45226	chr21	41442123	41442449	+	1138	NA	Intergenic	Intergenic	-25924	ENSDART00000192287.1	ENSDARG00000103922	bod1	ENSDART00000192287			ENSDARG00000103922.2
CNE14_1_q0.3_peak_82524	chr9	42418311	42418647	+	1138	NA	promoter-TSS (ENSDART00000144353.2)	-promoter-TSS (ENSDART00000144353.2)	-9	ENSDART00000144353.2	ENSDARG00000011473	calcrla	ENSDART00000144353			ENSDARG00000011473.10
CNE14_1_q0.3_peak_79600	chr8	50983638	50984048	+	1137	NA	exon (ENSDART00000142061.3, exon 1 of 18)	-exon (ENSDART00000142061.3, exon 1 of 18)	292	ENSDART00000142061.3	ENSDARG00000063159	si.dkey.32e23.4	ENSDART00000142061			ENSDARG00000063159.9
CNE14_1_q0.3_peak_8931	chr11	40711220	40711579	+	1137	NA	Intergenic	Intergenic	-15263	ENSDART00000173071.2	ENSDARG00000076532	si.ch211.222l21.1	ENSDART00000166372			ENSDARG00000076532.5
CNE14_1_q0.3_peak_79565	chr8	50810207	50810915	+	1137	NA	intron (ENSDART00000160612.2, intron 6 of 14)	-intron (ENSDART00000160612.2, intron 6 of 14)	67524	ENSDART00000160612.2	ENSDARG00000099651	bin3	ENSDART00000155664			ENSDARG00000099651.2
CNE14_1_q0.3_peak_44605	chr21	32781374	32782327	+	1136	NA	promoter-TSS (ENSDART00000031028.8)	-promoter-TSS (ENSDART00000031028.8)	-238	ENSDART00000031028.8	ENSDARG00000008255	cnot6a	ENSDART00000031028			ENSDARG00000008255.10
CNE14_1_q0.3_peak_17045	chr14	16093878	16094637	+	1136	NA	intron (ENSDART00000159181.2, intron 1 of 13)	-intron (ENSDART00000159181.2, intron 1 of 13)	368	ENSDART00000159181.2	ENSDARG00000102874	immt	ENSDART00000159181			ENSDARG00000102874.3
CNE14_1_q0.3_peak_28419	chr17	49438492	49439055	+	1135	NA	promoter-TSS (ENSDART00000004424.10)	-promoter-TSS (ENSDART00000004424.10)	100	ENSDART00000004424.10	ENSDARG00000016763	znf292a	ENSDART00000004424			ENSDARG00000016763.11
CNE14_1_q0.3_peak_60929	chr3	62287811	62288369	+	1135	NA	Intergenic	Intergenic	-1934	ENSDART00000185108.1	ENSDARG00000115456	zgc.173575	ENSDART00000185108			ENSDARG00000115456.1
CNE14_1_q0.3_peak_29565	chr18	5489921	5490766	+	1134	NA	promoter-TSS (ENSDART00000167035.3)	-promoter-TSS (ENSDART00000167035.3)	-325	ENSDART00000167035.3	ENSDARG00000101844	mibp2	ENSDART00000167035			ENSDARG00000101844.3
CNE14_1_q0.3_peak_5123	chr10	20416146	20416566	+	1134	NA	intron (ENSDART00000064613.7, intron 7 of 12)	-intron (ENSDART00000064613.7, intron 7 of 12)	23700	ENSDART00000160803.2	ENSDARG00000099593	r3hcc1	ENSDART00000166867			ENSDARG00000099593.2
CNE14_1_q0.3_peak_18249	chr14	47940190	47940627	+	1133	NA	promoter-TSS (ENSDART00000157785.2)	-promoter-TSS (ENSDART00000157785.2)	-50	ENSDART00000157785.2	ENSDARG00000005482	rapgef2	ENSDART00000166827			ENSDARG00000005482.9
CNE14_1_q0.3_peak_69327	chr6	7249412	7249744	+	1133	NA	promoter-TSS (ENSDART00000049695.9)	-promoter-TSS (ENSDART00000049695.9)	15	ENSDART00000136088.3	ENSDARG00000000943	dzip1	ENSDART00000083424			ENSDARG00000000943.12
CNE14_1_q0.3_peak_58265	chr3	12072090	12072570	+	1133	NA	Intergenic	Intergenic	-45589	ENSDART00000132238.2	ENSDARG00000058508	cfap70	ENSDART00000132238			ENSDARG00000058508.8
CNE14_1_q0.3_peak_4392	chr10	6775018	6775557	+	1133	NA	promoter-TSS (ENSDART00000110735.3)	-promoter-TSS (ENSDART00000110735.3)	-16	ENSDART00000110735.3	ENSDARG00000093498	zgc.194281	ENSDART00000110735			ENSDARG00000093498.3
CNE14_1_q0.3_peak_7431	chr11	8582452	8582782	+	1132	NA	intron (ENSDART00000081607.5, intron 1 of 14)	-intron (ENSDART00000081607.5, intron 1 of 14)	4563	ENSDART00000134372.3	ENSDARG00000095163	#N/A	ENSDART00000134372			ENSDARG00000095163.3
CNE14_1_q0.3_peak_26730	chr17	10566096	10566798	+	1132	NA	promoter-TSS (ENSDART00000137469.4)	-promoter-TSS (ENSDART00000137469.4)	-43	ENSDART00000144408.2	ENSDARG00000078784	mgaa	ENSDART00000137469			ENSDARG00000078784.8
CNE14_1_q0.3_peak_62973	chr4	54680119	54847213	+	1132	NA	intron (ENSDART00000167410.2, intron 3 of 3)	-intron (ENSDART00000167410.2, intron 3 of 3)	2137	ENSDART00000167410.2	ENSDARG00000100987	#N/A	ENSDART00000167410			ENSDARG00000100987.2
CNE14_1_q0.3_peak_13944	chr13	25284233	25284595	+	1132	NA	promoter-TSS (ENSDART00000124167.4)	-promoter-TSS (ENSDART00000124167.4)	-35	ENSDART00000124167.4	ENSDARG00000044968	vcla	ENSDART00000039828			ENSDARG00000044968.8
CNE14_1_q0.3_peak_13473	chr13	13970883	13971331	+	1131	NA	intron (ENSDART00000142997.2, intron 2 of 16)	-intron (ENSDART00000089501.5, intron 2 of 6)	25888	ENSDART00000142997.2	ENSDARG00000062139	eif2ak3	ENSDART00000089501			ENSDARG00000062139.7
CNE14_1_q0.3_peak_45856	chr22	367384	367747	+	1129	NA	promoter-TSS (ENSDART00000041895.7)	-promoter-TSS (ENSDART00000041895.7)	4	ENSDART00000041895.7	ENSDARG00000031216	ssu72	ENSDART00000041895			ENSDARG00000031216.7
CNE14_1_q0.3_peak_78529	chr8	33154360	33154928	+	1128	NA	promoter-TSS (ENSDART00000133300.2)	-promoter-TSS (ENSDART00000133300.2)	33	ENSDART00000133300.2	ENSDARG00000013492	zbtb34	ENSDART00000133300			ENSDARG00000013492.8
CNE14_1_q0.3_peak_77947	chr8	17838784	17839102	+	1128	NA	promoter-TSS (ENSDART00000170762.2)	-promoter-TSS (ENSDART00000170762.2)	19	ENSDART00000170762.2	ENSDARG00000057419	slc44a5b	ENSDART00000080079			ENSDARG00000057419.7
CNE14_1_q0.3_peak_45828	chr22	189409	190027	+	1128	NA	Intergenic	Intergenic	-1606	ENSDART00000170463.2	ENSDARG00000087401	slc25a34	ENSDART00000125391			ENSDARG00000087401.3
CNE14_1_q0.3_peak_29172	chr18	298419	299447	+	1128	NA	exon (ENSDART00000194157.1, exon 1 of 4)	-exon (ENSDART00000194157.1, exon 1 of 4)	321	ENSDART00000194157.1	ENSDARG00000117284	LOC101885225	ENSDART00000194157			ENSDARG00000117284.1
CNE14_1_q0.3_peak_41210	chr20	37628480	37628979	+	1127	NA	exon (ENSDART00000141734.4, exon 1 of 9)	-exon (ENSDART00000141734.4, exon 1 of 9)	355	ENSDART00000141734.4	ENSDARG00000039987	hivep2a	ENSDART00000177011			ENSDARG00000039987.9
CNE14_1_q0.3_peak_44978	chr21	39058054	39058686	+	1127	NA	exon (ENSDART00000049453.7, exon 1 of 4)	-exon (ENSDART00000049453.7, exon 1 of 4)	111	ENSDART00000049453.7	ENSDARG00000029381	aldh3a2b	ENSDART00000114885			ENSDARG00000029381.9
CNE14_1_q0.3_peak_59285	chr3	39568066	39568544	+	1125	NA	promoter-TSS (ENSDART00000020741.8)	-promoter-TSS (ENSDART00000020741.8)	15	ENSDART00000020741.8	ENSDARG00000011665	aldoaa	ENSDART00000020741			ENSDARG00000011665.9
CNE14_1_q0.3_peak_25750	chr17	1795245	1795637	+	1125	NA	Intergenic	Intergenic	-90428	ENSDART00000182864.1	ENSDARG00000110371	#N/A	ENSDART00000182864			ENSDARG00000110371.1
CNE14_1_q0.3_peak_76734	chr8	1081963	1082615	+	1125	NA	exon (ENSDART00000149276.2, exon 1 of 8)	-exon (ENSDART00000149276.2, exon 1 of 8)	189	ENSDART00000149276.2	ENSDARG00000058558	lzts3b	ENSDART00000149276			ENSDARG00000058558.7
CNE14_1_q0.3_peak_65815	chr5	19244285	19244690	+	1125	NA	Intergenic	Intergenic	-16904	ENSDART00000089173.5	ENSDARG00000062040	atp8b5a	ENSDART00000139401			ENSDARG00000062040.6
CNE14_1_q0.3_peak_55272	chr25	5983238	5983778	+	1124	NA	promoter-TSS (ENSDART00000074814.6)	-promoter-TSS (ENSDART00000074814.6)	78	ENSDART00000074814.6	ENSDARG00000092798	ppib	ENSDART00000074814			ENSDARG00000092798.4
CNE14_1_q0.3_peak_58023	chr3	8005930	8006981	+	1124	NA	TTS (ENSDART00000169673.2)	-TTS (ENSDART00000169673.2)	6392	ENSDART00000169673.2	ENSDARG00000100373	si.ch211.175l6.1	ENSDART00000169673			ENSDARG00000100373.2
CNE14_1_q0.3_peak_73977	chr7	24881317	24881724	+	1124	NA	promoter-TSS (ENSDART00000058843.7)	-promoter-TSS (ENSDART00000058843.7)	-160	ENSDART00000058843.7	ENSDARG00000040224	krcp	ENSDART00000058843			ENSDARG00000040224.7
CNE14_1_q0.3_peak_72628	chr7	3096602	3300452	+	1124	NA	Intergenic	Intergenic	26942	ENSDART00000138299.4	ENSDARG00000076398	#N/A	ENSDART00000138299			ENSDARG00000076398.6
CNE14_1_q0.3_peak_69820	chr6	18782761	18783307	+	1124	NA	Intergenic	Intergenic	-31338	ENSDART00000171537.2	ENSDARG00000103851	tnrc6c2	ENSDART00000170998			ENSDARG00000103851.2
CNE14_1_q0.3_peak_61610	chr4	16664072	16664426	+	1123	NA	intron (ENSDART00000140510.3, intron 8 of 20)	-intron (ENSDART00000033053.6, intron 9 of 21)	-5735	ENSDART00000133837.2	ENSDARG00000003789	dennd5b	ENSDART00000141119			ENSDARG00000003789.12
CNE14_1_q0.3_peak_8905	chr11	39958701	39959129	+	1122	NA	promoter-TSS (ENSDART00000024304.10)	-promoter-TSS (ENSDART00000024304.10)	-124	ENSDART00000024304.10	ENSDARG00000010519	per3	ENSDART00000173401			ENSDARG00000010519.10
CNE14_1_q0.3_peak_67839	chr5	67349146	67349788	+	1122	NA	exon (ENSDART00000144092.3, exon 1 of 17)	-exon (ENSDART00000144092.3, exon 1 of 17)	449	ENSDART00000144092.3	ENSDARG00000059474	mlxip	ENSDART00000144092			ENSDARG00000059474.8
CNE14_1_q0.3_peak_50757	chr23	26227686	26228405	+	1121	NA	promoter-TSS (ENSDART00000158082.2)	-promoter-TSS (ENSDART00000158082.2)	32	ENSDART00000162423.2	ENSDARG00000098968	LOC100330644	ENSDART00000162423			ENSDARG00000098968.2
CNE14_1_q0.3_peak_49954	chr23	12160778	12161156	+	1121	NA	promoter-TSS (ENSDART00000136046.2)	-promoter-TSS (ENSDART00000136046.2)	67	ENSDART00000136046.2	ENSDARG00000077513	ppp1r3da	ENSDART00000136046			ENSDARG00000077513.5
CNE14_1_q0.3_peak_66650	chr5	41510123	41510514	+	1121	NA	promoter-TSS (ENSDART00000023779.9)	-promoter-TSS (ENSDART00000023779.9)	-69	ENSDART00000023779.9	ENSDARG00000020008	vcp	ENSDART00000134317			ENSDARG00000020008.10
CNE14_1_q0.3_peak_23837	chr16	27336130	27336490	+	1121	NA	Intergenic	Intergenic	-9073	ENSDART00000078250.5	ENSDARG00000055854	nr4a3	ENSDART00000078250			ENSDARG00000055854.5
CNE14_1_q0.3_peak_2845	chr1	54111273	54111958	+	1120	NA	Intergenic	Intergenic	-4224	ENSDART00000180214.1	ENSDARG00000116898	rln3b	ENSDART00000180214			ENSDARG00000116898.1
CNE14_1_q0.3_peak_65142	chr5	6854271	6854796	+	1120	NA	promoter-TSS (ENSDART00000148663.2)	-promoter-TSS (ENSDART00000148663.2)	35	ENSDART00000148663.2	ENSDARG00000045095	elac1	ENSDART00000148663			ENSDARG00000045095.6
CNE14_1_q0.3_peak_7607	chr11	12719860	12720601	+	1120	NA	promoter-TSS (ENSDART00000122812.3)	-promoter-TSS (ENSDART00000122812.3)	59	ENSDART00000135761.3	ENSDARG00000058504	ap1s2	ENSDART00000122812			ENSDARG00000058504.8
CNE14_1_q0.3_peak_67442	chr5	58454936	58455373	+	1120	NA	promoter-TSS (ENSDART00000038602.7)	-promoter-TSS (ENSDART00000038602.7)	-334	ENSDART00000038602.7	ENSDARG00000023394	slc37a2	ENSDART00000127958			ENSDARG00000023394.9
CNE14_1_q0.3_peak_72272	chr6	59487525	59487900	+	1119	NA	intron (ENSDART00000170685.3, intron 1 of 12)	-intron (ENSDART00000170685.3, intron 1 of 12)	17877	ENSDART00000170685.3	ENSDARG00000101244	gli1	ENSDART00000170685			ENSDARG00000101244.3
CNE14_1_q0.3_peak_67409	chr5	57210066	57210470	+	1119	NA	promoter-TSS (ENSDART00000167660.2)	-promoter-TSS (ENSDART00000167660.2)	31	ENSDART00000167660.2	ENSDARG00000100296	pja2	ENSDART00000167660			ENSDARG00000100296.2
CNE14_1_q0.3_peak_50650	chr23	23401141	23401510	+	1119	NA	promoter-TSS (ENSDART00000078936.4)	-promoter-TSS (ENSDART00000078936.4)	-20	ENSDART00000078936.4	ENSDARG00000056438	her9	ENSDART00000078936			ENSDARG00000056438.4
CNE14_1_q0.3_peak_27634	chr17	37510705	37511329	+	1118	NA	promoter-TSS (ENSDART00000156281.2)	-promoter-TSS (ENSDART00000156281.2)	-4	ENSDART00000156281.2	ENSDARG00000007198	mta1	ENSDART00000187935			ENSDARG00000007198.10
CNE14_1_q0.3_peak_36447	chr2	23931205	23931745	+	1118	NA	promoter-TSS (ENSDART00000121885.3)	-promoter-TSS (ENSDART00000121885.3)	61	ENSDART00000121885.3	ENSDARG00000017494	tgfbr1a	ENSDART00000121885			ENSDARG00000017494.9
CNE14_1_q0.3_peak_65845	chr5	20122873	20123196	+	1118	NA	promoter-TSS (ENSDART00000026516.7)	-promoter-TSS (ENSDART00000026516.7)	-32	ENSDART00000026516.7	ENSDARG00000003144	pxmp2	ENSDART00000138049			ENSDARG00000003144.7
CNE14_1_q0.3_peak_50590	chr23	22072406	22072890	+	1118	NA	promoter-TSS (ENSDART00000054362.7)	-promoter-TSS (ENSDART00000054362.7)	68	ENSDART00000054362.7	ENSDARG00000056695	phc2a	ENSDART00000054362			ENSDARG00000056695.8
CNE14_1_q0.3_peak_49980	chr23	12913722	12914144	+	1118	NA	promoter-TSS (ENSDART00000081038.5)	-promoter-TSS (ENSDART00000081038.5)	-802	ENSDART00000081038.5	ENSDARG00000058212	ndnl2	ENSDART00000081038			ENSDARG00000058212.7
CNE14_1_q0.3_peak_7144	chr11	6009968	6010630	+	1116	NA	promoter-TSS (ENSDART00000188999.1)	-promoter-TSS (ENSDART00000188999.1)	8	ENSDART00000188999.1	ENSDARG00000018650	gtpbp3	ENSDART00000170047			ENSDARG00000018650.11
CNE14_1_q0.3_peak_41335	chr20	39788754	39789318	+	1116	NA	promoter-TSS (ENSDART00000086405.8)	-promoter-TSS (ENSDART00000086405.8)	0	ENSDART00000086405.8	ENSDARG00000060944	rnf217	ENSDART00000098253			ENSDARG00000060944.8
CNE14_1_q0.3_peak_81577	chr9	16444852	16445276	+	1115	NA	Intergenic	Intergenic	-4334	ENSDART00000006787.12	ENSDARG00000039373	epha3	ENSDART00000006787			ENSDARG00000039373.9
CNE14_1_q0.3_peak_19597	chr15	5563350	5563780	+	1115	NA	promoter-TSS (ENSDART00000099520.5)	-promoter-TSS (ENSDART00000099520.5)	-14	ENSDART00000099520.5	ENSDARG00000043238	atg16l2	ENSDART00000099520			ENSDARG00000043238.9
CNE14_1_q0.3_peak_55568	chr25	13870917	13871602	+	1115	NA	promoter-TSS (ENSDART00000160866.2)	-promoter-TSS (ENSDART00000160866.2)	-138	ENSDART00000165584.2	ENSDARG00000102403	cry2	ENSDART00000160866			ENSDARG00000102403.2
CNE14_1_q0.3_peak_30187	chr18	22093584	22094375	+	1114	NA	exon (ENSDART00000100904.4, exon 1 of 3)	-exon (ENSDART00000100904.4, exon 1 of 3)	123	ENSDART00000100904.4	ENSDARG00000069378	pard6a	ENSDART00000100904			ENSDARG00000069378.4
CNE14_1_q0.3_peak_45972	chr22	1137721	1138249	+	1114	NA	promoter-TSS (ENSDART00000158017.2)	-promoter-TSS (ENSDART00000158017.2)	-12	ENSDART00000158017.2	ENSDARG00000100747	si.ch211.103a14.5	ENSDART00000158017			ENSDARG00000100747.2
CNE14_1_q0.3_peak_49666	chr23	6749581	6749998	+	1114	NA	promoter-TSS (ENSDART00000128772.3)	-promoter-TSS (ENSDART00000128772.3)	31	ENSDART00000128772.3	ENSDARG00000089626	ptges3b	ENSDART00000128772			ENSDARG00000089626.3
CNE14_1_q0.3_peak_31339	chr18	45799480	45799848	+	1114	NA	intron (ENSDART00000135045.3, intron 2 of 4)	-intron (ENSDART00000087070.7, intron 1 of 27)	3568	ENSDART00000087070.7	ENSDARG00000061233	abcc5	ENSDART00000087070			ENSDARG00000061233.8
CNE14_1_q0.3_peak_18406	chr14	49462742	49463240	+	1113	NA	promoter-TSS (ENSDART00000171925.2)	-promoter-TSS (ENSDART00000171925.2)	92	ENSDART00000171925.2	ENSDARG00000023988	dctn4	ENSDART00000036462			ENSDARG00000023988.9
CNE14_1_q0.3_peak_37466	chr2	47471566	47472405	+	1113	NA	promoter-TSS (ENSDART00000141974.3)	-promoter-TSS (ENSDART00000141974.3)	42	ENSDART00000141974.3	ENSDARG00000014674	acsl3b	ENSDART00000184199			ENSDARG00000014674.11
CNE14_1_q0.3_peak_23459	chr16	17699592	17700205	+	1113	NA	promoter-TSS (ENSDART00000108581.4)	-promoter-TSS (ENSDART00000108581.4)	-787	ENSDART00000108581.4	ENSDARG00000079530	si.dkey.17m8.1	ENSDART00000108581			ENSDARG00000079530.6
CNE14_1_q0.3_peak_32970	chr19	12472833	12473155	+	1112	NA	intron (ENSDART00000135706.3, intron 1 of 5)	-intron (ENSDART00000135706.3, intron 1 of 5)	28051	ENSDART00000135706.3	ENSDARG00000070555	ldlrad4a	ENSDART00000151508			ENSDARG00000070555.8
CNE14_1_q0.3_peak_52342	chr24	7587085	7587504	+	1112	NA	intron (ENSDART00000093163.6, intron 1 of 11)	-intron (ENSDART00000093163.6, intron 1 of 11)	107	ENSDART00000093163.6	ENSDARG00000063636	galnt11	ENSDART00000171568			ENSDARG00000063636.7
CNE14_1_q0.3_peak_4314	chr10	5492629	5492998	+	1112	NA	Intergenic	Intergenic	34551	ENSDART00000142214.2	ENSDARG00000092808	#N/A	ENSDART00000142214			ENSDARG00000092808.2
CNE14_1_q0.3_peak_77904	chr8	16558955	16559454	+	1112	NA	promoter-TSS (ENSDART00000098692.5)	-promoter-TSS (ENSDART00000098692.5)	-23	ENSDART00000098692.5	ENSDARG00000078216	eps15	ENSDART00000124257			ENSDARG00000078216.5
CNE14_1_q0.3_peak_65463	chr5	12030845	12031245	+	1111	NA	exon (ENSDART00000110991.5, exon 1 of 9)	-exon (ENSDART00000110991.5, exon 1 of 9)	129	ENSDART00000159896.2	ENSDARG00000107096	#N/A	ENSDART00000159896			ENSDARG00000107096.2
CNE14_1_q0.3_peak_15300	chr13	50200125	50200492	+	1111	NA	promoter-TSS (ENSDART00000038391.8)	-promoter-TSS (ENSDART00000038391.8)	40	ENSDART00000038391.8	ENSDARG00000052396	pkz	ENSDART00000038391			ENSDARG00000052396.7
CNE14_1_q0.3_peak_52503	chr24	9881127	9881784	+	1110	NA	exon (ENSDART00000036204.5, exon 1 of 5)	-exon (ENSDART00000036204.5, exon 1 of 5)	236	ENSDART00000036204.5	ENSDARG00000023028	cdv3	ENSDART00000036204			ENSDARG00000023028.7
CNE14_1_q0.3_peak_77876	chr8	15520437	15520811	+	1109	NA	exon (ENSDART00000133114.3, exon 1 of 6)	-exon (ENSDART00000133114.3, exon 1 of 6)	283	ENSDART00000133114.3	ENSDARG00000075624	bend5	ENSDART00000133114			ENSDARG00000075624.6
CNE14_1_q0.3_peak_83610	chr9	54618828	54619364	+	1108	NA	Intergenic	Intergenic	-10897	ENSDART00000067544.7	ENSDARG00000045958	egfl6	ENSDART00000167769			ENSDARG00000045958.7
CNE14_1_q0.3_peak_75311	chr7	59522632	59527623	+	1107	NA	Intergenic	Intergenic	-9469	ENSDART00000163745.2	ENSDARG00000098605	slx1b	ENSDART00000163745			ENSDARG00000098605.2
CNE14_1_q0.3_peak_68576	chr6	138390	139193	+	1107	NA	promoter-TSS (ENSDART00000148911.2)	-promoter-TSS (ENSDART00000148911.2)	-188	ENSDART00000148911.2	ENSDARG00000074634	keap1b	ENSDART00000186561			ENSDARG00000074634.5
CNE14_1_q0.3_peak_59326	chr3	40565871	40566218	+	1106	NA	Intergenic	Intergenic	-10403	ENSDART00000083212.5	ENSDARG00000059680	fscn1a	ENSDART00000083212			ENSDARG00000059680.5
CNE14_1_q0.3_peak_34136	chr19	42328165	42328689	+	1106	NA	promoter-TSS (ENSDART00000077059.5)	-promoter-TSS (ENSDART00000077059.5)	4	ENSDART00000077059.5	ENSDARG00000054804	anp32e	ENSDART00000077059			ENSDARG00000054804.7
CNE14_1_q0.3_peak_36483	chr2	24855226	24855567	+	1106	NA	intron (ENSDART00000141030.4, intron 6 of 14)	-intron (ENSDART00000002096.8, intron 5 of 15)	-12138	ENSDART00000158050.2	ENSDARG00000056347	rab3aa	ENSDART00000158050			ENSDARG00000056347.6
CNE14_1_q0.3_peak_62010	chr4	28583920	28588943	+	1104	NA	Intergenic	Intergenic	-44296	ENSDART00000178343.2	ENSDARG00000106572	#N/A	ENSDART00000178343			ENSDARG00000106572.2
CNE14_1_q0.3_peak_23704	chr16	23495503	23496058	+	1104	NA	exon (ENSDART00000021092.9, exon 1 of 13)	-exon (ENSDART00000021092.9, exon 1 of 13)	180	ENSDART00000021092.9	ENSDARG00000016977	snx27b	ENSDART00000021092			ENSDARG00000016977.10
CNE14_1_q0.3_peak_27179	chr17	23729598	23730046	+	1104	NA	promoter-TSS (ENSDART00000034913.6)	-promoter-TSS (ENSDART00000034913.6)	105	ENSDART00000179026.2	ENSDARG00000057053	zgc.91976	ENSDART00000034913			ENSDARG00000057053.7
CNE14_1_q0.3_peak_80617	chr9	2762101	2763042	+	1101	NA	exon (ENSDART00000001795.9, exon 1 of 7)	-exon (ENSDART00000001795.9, exon 1 of 7)	156	ENSDART00000177563.2	ENSDARG00000001549	sp3a	ENSDART00000001795			ENSDARG00000001549.13
CNE14_1_q0.3_peak_82169	chr9	30502924	30503496	+	1101	NA	Intergenic	Intergenic	-1200	ENSDART00000149483.3	ENSDARG00000095912	si.dkey.229b18.3	ENSDART00000149483			ENSDARG00000095912.3
CNE14_1_q0.3_peak_31338	chr18	45791732	45792061	+	1100	NA	promoter-TSS (ENSDART00000135045.3)	-promoter-TSS (ENSDART00000135045.3)	-139	ENSDART00000135045.3	ENSDARG00000061233	abcc5	ENSDART00000087070			ENSDARG00000061233.8
CNE14_1_q0.3_peak_50776	chr23	27051778	27052159	+	1100	NA	promoter-TSS (ENSDART00000054237.7)	-promoter-TSS (ENSDART00000054237.7)	49	ENSDART00000054237.7	ENSDARG00000037284	ptges3a	ENSDART00000054237			ENSDARG00000037284.7
CNE14_1_q0.3_peak_79595	chr8	50941954	50942399	+	1100	NA	promoter-TSS (ENSDART00000124748.4)	-promoter-TSS (ENSDART00000124748.4)	-64	ENSDART00000124748.4	ENSDARG00000015887	b2ml	ENSDART00000124748			ENSDARG00000015887.11
CNE14_1_q0.3_peak_2267	chr1	40415900	40416519	+	1099	NA	intron (ENSDART00000114659.4, intron 1 of 2)	-intron (ENSDART00000114659.4, intron 1 of 2)	-4265	ENSDART00000144135.3	ENSDARG00000079552	maml3	ENSDART00000114659			ENSDARG00000079552.6
CNE14_1_q0.3_peak_15771	chr14	970669	970992	+	1099	NA	promoter-TSS (ENSDART00000130801.3)	-promoter-TSS (ENSDART00000130801.3)	23	ENSDART00000130801.3	ENSDARG00000003854	acsl1b	ENSDART00000010773			ENSDARG00000003854.9
CNE14_1_q0.3_peak_71713	chr6	56147306	56148050	+	1099	NA	promoter-TSS (ENSDART00000150219.2)	-promoter-TSS (ENSDART00000150219.2)	-134	ENSDART00000150219.2	ENSDARG00000040606	tfap2c	ENSDART00000149665			ENSDARG00000040606.8
CNE14_1_q0.3_peak_65965	chr5	23136365	23137095	+	1099	NA	exon (ENSDART00000003428.10, exon 1 of 7)	-exon (ENSDART00000003428.10, exon 1 of 7)	168	ENSDART00000171039.2	ENSDARG00000015524	prps1a	ENSDART00000003428			ENSDARG00000015524.13
CNE14_1_q0.3_peak_78462	chr8	31368921	31369346	+	1099	NA	promoter-TSS (ENSDART00000019937.6)	-promoter-TSS (ENSDART00000019937.6)	12	ENSDART00000166690.2	ENSDARG00000019417	gadd45ga	ENSDART00000166690			ENSDARG00000019417.6
CNE14_1_q0.3_peak_72398	chr6	60201138	60201772	+	1098	NA	Intergenic	Intergenic	-53938	ENSDART00000083453.7	ENSDARG00000059775	slc32a1	ENSDART00000083453			ENSDARG00000059775.7
CNE14_1_q0.3_peak_48765	chr23	900077	900571	+	1098	NA	TTS (ENSDART00000192851.1)	-TTS (ENSDART00000192851.1)	471	ENSDART00000111456.4	ENSDARG00000077400	rbm10	ENSDART00000133906			ENSDARG00000077400.5
CNE14_1_q0.3_peak_36348	chr2	20866503	20866931	+	1098	NA	promoter-TSS (ENSDART00000150086.2)	-promoter-TSS (ENSDART00000150086.2)	41	ENSDART00000165374.2	ENSDARG00000103004	tpra	ENSDART00000165374			ENSDARG00000103004.2
CNE14_1_q0.3_peak_46761	chr22	11273230	11273609	+	1097	NA	intron (ENSDART00000167615.2, intron 1 of 3)	-intron (ENSDART00000167615.2, intron 1 of 3)	69990	ENSDART00000167615.2	ENSDARG00000100563	#N/A	ENSDART00000167615			ENSDARG00000100563.2
CNE14_1_q0.3_peak_29977	chr18	15609913	15610614	+	1096	NA	promoter-TSS (ENSDART00000127614.4)	-promoter-TSS (ENSDART00000127614.4)	-26	ENSDART00000127614.4	ENSDARG00000041381	arntl2	ENSDART00000099849			ENSDARG00000041381.11
CNE14_1_q0.3_peak_41598	chr20	46311076	46311456	+	1096	NA	promoter-TSS (ENSDART00000038696.8)	-promoter-TSS (ENSDART00000038696.8)	24	ENSDART00000038696.8	ENSDARG00000031506	flvcr2b	ENSDART00000184743			ENSDARG00000031506.9
CNE14_1_q0.3_peak_73871	chr7	21664323	21664754	+	1095	NA	intron (ENSDART00000173557.2, intron 2 of 4)	-intron (ENSDART00000173557.2, intron 2 of 4)	32438	ENSDART00000173557.2	ENSDARG00000088087	kdm6ba	ENSDART00000127719			ENSDARG00000088087.4
CNE14_1_q0.3_peak_73599	chr7	15829832	15830386	+	1095	NA	exon (ENSDART00000102363.5, exon 1 of 6)	-exon (ENSDART00000102363.5, exon 1 of 6)	142	ENSDART00000102363.5	ENSDARG00000070006	rcn1	ENSDART00000102363			ENSDARG00000070006.6
CNE14_1_q0.3_peak_56227	chr25	29645542	29646094	+	1093	NA	Intergenic	Intergenic	-16593	ENSDART00000077445.7	ENSDARG00000055129	pim3	ENSDART00000077445			ENSDARG00000055129.7
CNE14_1_q0.3_peak_71512	chr6	54347627	54348686	+	1093	NA	intron (ENSDART00000156501.2, intron 1 of 4)	-intron (ENSDART00000156501.2, intron 1 of 4)	412	ENSDART00000156501.2	ENSDARG00000078075	ilrun	ENSDART00000156501			ENSDARG00000078075.6
CNE14_1_q0.3_peak_47298	chr22	24603577	24604088	+	1092	NA	promoter-TSS (ENSDART00000164256.2)	-promoter-TSS (ENSDART00000164256.2)	-98	ENSDART00000180240.1	ENSDARG00000100186	clcc1	ENSDART00000180240			ENSDARG00000100186.2
CNE14_1_q0.3_peak_20006	chr15	11693280	11693986	+	1091	NA	promoter-TSS (ENSDART00000161930.3)	-promoter-TSS (ENSDART00000161930.3)	9	ENSDART00000161930.3	ENSDARG00000102902	strn4	ENSDART00000161930			ENSDARG00000102902.3
CNE14_1_q0.3_peak_18882	chr15	1221749	1222182	+	1091	NA	Intergenic	Intergenic	22558	ENSDART00000163827.2	ENSDARG00000101379	#N/A	ENSDART00000163827			ENSDARG00000101379.2
CNE14_1_q0.3_peak_52192	chr24	2419864	2420371	+	1090	NA	intron (ENSDART00000188080.1, intron 1 of 12)	-intron (ENSDART00000093331.5, intron 1 of 11)	3674	ENSDART00000190402.1	ENSDARG00000063701	rreb1a	ENSDART00000190402			ENSDARG00000063701.7
CNE14_1_q0.3_peak_74287	chr7	33685341	33685676	+	1090	NA	promoter-TSS (ENSDART00000130553.4)	-promoter-TSS (ENSDART00000130553.4)	-876	ENSDART00000130553.4	ENSDARG00000069006	tle3b	ENSDART00000191148			ENSDARG00000069006.8
CNE14_1_q0.3_peak_40429	chr20	15079743	15080765	+	1090	NA	Intergenic	Intergenic	9484	ENSDART00000164552.2	ENSDARG00000043518	si.dkey.239i20.2	ENSDART00000122592			ENSDARG00000043518.6
CNE14_1_q0.3_peak_30367	chr18	25937934	25938293	+	1089	NA	Intergenic	Intergenic	-32490	ENSDART00000163369.3	ENSDARG00000074414	sema4ba	ENSDART00000143899			ENSDARG00000074414.6
CNE14_1_q0.3_peak_58594	chr3	18792199	18792675	+	1088	NA	promoter-TSS (ENSDART00000034373.6)	-promoter-TSS (ENSDART00000034373.6)	55	ENSDART00000134208.3	ENSDARG00000025338	hagh	ENSDART00000134208			ENSDARG00000025338.9
CNE14_1_q0.3_peak_67511	chr5	60518443	60518941	+	1087	NA	promoter-TSS (ENSDART00000130565.4)	-promoter-TSS (ENSDART00000130565.4)	81	ENSDART00000186310.1	ENSDARG00000090830	tmem132e	ENSDART00000159859			ENSDARG00000090830.4
CNE14_1_q0.3_peak_21472	chr15	43327646	43328061	+	1087	NA	promoter-TSS (ENSDART00000077386.6)	-promoter-TSS (ENSDART00000077386.6)	58	ENSDART00000077386.6	ENSDARG00000076602	prss16	ENSDART00000155103			ENSDARG00000076602.5
CNE14_1_q0.3_peak_63936	chr4	74429683	74918726	+	1087	NA	Intergenic	Intergenic	110012	ENSDART00000174338.2	ENSDARG00000105822	#N/A	ENSDART00000174338			ENSDARG00000105822.2
CNE14_1_q0.3_peak_5391	chr10	28245084	28245930	+	1086	NA	Intergenic	Intergenic	-7171	ENSDART00000118706.2	ENSDARG00000081078	#N/A	ENSDART00000118706			ENSDARG00000081078.2
CNE14_1_q0.3_peak_34373	chr19	46058649	46059135	+	1086	NA	promoter-TSS (ENSDART00000170409.2)	-promoter-TSS (ENSDART00000170409.2)	71	ENSDART00000170409.2	ENSDARG00000099972	nup153	ENSDART00000170409			ENSDARG00000099972.2
CNE14_1_q0.3_peak_48013	chr22	35193997	35194384	+	1084	NA	promoter-TSS (ENSDART00000104687.8)	-promoter-TSS (ENSDART00000104687.8)	-3	ENSDART00000164443.2	ENSDARG00000003952	pfn2	ENSDART00000164443			ENSDARG00000003952.12
CNE14_1_q0.3_peak_65681	chr5	15992431	15993197	+	1084	NA	exon (ENSDART00000182148.1, exon 1 of 8)	-exon (ENSDART00000182148.1, exon 1 of 8)	159	ENSDART00000182148.1	ENSDARG00000062573	znrf3	ENSDART00000182148			ENSDARG00000062573.8
CNE14_1_q0.3_peak_33188	chr19	18157628	18158038	+	1084	NA	Intergenic	Intergenic	-4891	ENSDART00000190182.1	ENSDARG00000019810	nfe2l3	ENSDART00000193264			ENSDARG00000019810.7
CNE14_1_q0.3_peak_33318	chr19	20106132	20106630	+	1083	NA	intron (ENSDART00000043924.7, intron 1 of 12)	-intron (ENSDART00000043924.7, intron 1 of 12)	105	ENSDART00000043924.7	ENSDARG00000029761	mpp6b	ENSDART00000129917			ENSDARG00000029761.9
CNE14_1_q0.3_peak_78312	chr8	26961485	26961884	+	1083	NA	promoter-TSS (ENSDART00000099214.4)	-promoter-TSS (ENSDART00000099214.4)	95	ENSDART00000099214.4	ENSDARG00000068572	slc16a1b	ENSDART00000099214			ENSDARG00000068572.4
CNE14_1_q0.3_peak_70451	chr6	32325822	32326550	+	1083	NA	promoter-TSS (ENSDART00000181177.1)	-promoter-TSS (ENSDART00000181177.1)	1	ENSDART00000181177.1	ENSDARG00000078675	dock7	ENSDART00000157878			ENSDARG00000078675.6
CNE14_1_q0.3_peak_56238	chr25	30195537	30196173	+	1083	NA	promoter-TSS (ENSDART00000005299.10)	-promoter-TSS (ENSDART00000005299.10)	-184	ENSDART00000005299.10	ENSDARG00000015709	hsd17b12a	ENSDART00000141167			ENSDARG00000015709.11
CNE14_1_q0.3_peak_32556	chr19	2875895	2876274	+	1083	NA	promoter-TSS (ENSDART00000160847.3)	-promoter-TSS (ENSDART00000160847.3)	-22	ENSDART00000189309.1	ENSDARG00000101259	hgh1	ENSDART00000189309			ENSDARG00000101259.3
CNE14_1_q0.3_peak_46807	chr22	12862199	12862637	+	1083	NA	promoter-TSS (ENSDART00000137280.2)	-promoter-TSS (ENSDART00000137280.2)	-3	ENSDART00000145156.3	ENSDARG00000062812	glsa	ENSDART00000145156			ENSDARG00000062812.7
CNE14_1_q0.3_peak_58478	chr3	16039427	16039952	+	1083	NA	promoter-TSS (ENSDART00000143324.2)	-promoter-TSS (ENSDART00000143324.2)	-70	ENSDART00000143324.2	ENSDARG00000077737	spsb3a	ENSDART00000143324			ENSDARG00000077737.5
CNE14_1_q0.3_peak_16120	chr14	4239934	4240416	+	1082	NA	intron (ENSDART00000127318.3, intron 2 of 16)	-intron (ENSDART00000127318.3, intron 2 of 16)	33121	ENSDART00000157725.2	ENSDARG00000089009	frmpd1b	ENSDART00000127318			ENSDARG00000089009.3
CNE14_1_q0.3_peak_12707	chr13	3002239	3002679	+	1081	NA	Intergenic	Intergenic	-20987	ENSDART00000184820.1	ENSDARG00000109443	eml4	ENSDART00000184820			ENSDARG00000109443.1
CNE14_1_q0.3_peak_35005	chr2	1130598	1131163	+	1081	NA	Intergenic	Intergenic	6368	ENSDART00000108718.4	ENSDARG00000076509	polr2d	ENSDART00000108718			ENSDARG00000076509.5
CNE14_1_q0.3_peak_38862	chr20	211405	212032	+	1081	NA	intron (ENSDART00000104790.5, intron 1 of 7)	-intron (ENSDART00000104790.5, intron 1 of 7)	202	ENSDART00000104790.5	ENSDARG00000043973	znf292b	ENSDART00000104790			ENSDARG00000043973.6
CNE14_1_q0.3_peak_8949	chr11	41084076	41084560	+	1080	NA	promoter-TSS (ENSDART00000166999.3)	-promoter-TSS (ENSDART00000166999.3)	40	ENSDART00000166999.3	ENSDARG00000099306	zgc.175088	ENSDART00000166999			ENSDARG00000099306.3
CNE14_1_q0.3_peak_31143	chr18	40354452	40355001	+	1079	NA	promoter-TSS (ENSDART00000049171.7)	-promoter-TSS (ENSDART00000049171.7)	-272	ENSDART00000049171.7	ENSDARG00000011533	sema6dl	ENSDART00000130847			ENSDARG00000011533.11
CNE14_1_q0.3_peak_14419	chr13	40334625	40335149	+	1079	NA	exon (ENSDART00000074950.5, exon 1 of 4)	-exon (ENSDART00000074950.5, exon 1 of 4)	160	ENSDART00000074950.5	ENSDARG00000052994	slc25a28	ENSDART00000074950			ENSDARG00000052994.5
CNE14_1_q0.3_peak_56650	chr25	33849433	33849971	+	1079	NA	promoter-TSS (ENSDART00000121449.3)	-promoter-TSS (ENSDART00000121449.3)	55	ENSDART00000121449.3	ENSDARG00000031768	roraa	ENSDART00000121449			ENSDARG00000031768.11
CNE14_1_q0.3_peak_44240	chr21	22878587	22879283	+	1078	NA	promoter-TSS (ENSDART00000186399.1)	-promoter-TSS (ENSDART00000186399.1)	-56	ENSDART00000186399.1	ENSDARG00000044625	pcf11	ENSDART00000186399			ENSDARG00000044625.5
CNE14_1_q0.3_peak_33587	chr19	26947604	26948037	+	1078	NA	Intergenic	Intergenic	-3884	ENSDART00000159319.2	ENSDARG00000103949	zbtb12.1	ENSDART00000159319			ENSDARG00000103949.2
CNE14_1_q0.3_peak_73458	chr7	12151047	12151383	+	1078	NA	intron (ENSDART00000161679.3, intron 20 of 20)	-intron (ENSDART00000161679.3, intron 20 of 20)	-20914	ENSDART00000117142.2	ENSDARG00000082308	#N/A	ENSDART00000117142			ENSDARG00000082308.2
CNE14_1_q0.3_peak_66831	chr5	46324628	46324985	+	1078	NA	Intergenic	Intergenic	5074	ENSDART00000156577.3	ENSDARG00000098013	#N/A	ENSDART00000156577			ENSDARG00000098013.3
CNE14_1_q0.3_peak_10713	chr12	20627435	20627863	+	1077	NA	exon (ENSDART00000074384.5, exon 1 of 11)	-exon (ENSDART00000074384.5, exon 1 of 11)	144	ENSDART00000074384.5	ENSDARG00000052518	stx4	ENSDART00000074384			ENSDARG00000052518.5
CNE14_1_q0.3_peak_69483	chr6	10168622	10168964	+	1076	NA	promoter-TSS (ENSDART00000151016.2)	-promoter-TSS (ENSDART00000151016.2)	29	ENSDART00000151016.2	ENSDARG00000079700	b3galt1a	ENSDART00000151016			ENSDARG00000079700.4
CNE14_1_q0.3_peak_29609	chr18	5813849	5814232	+	1076	NA	promoter-TSS (ENSDART00000020233.9)	-promoter-TSS (ENSDART00000020233.9)	44	ENSDART00000020233.9	ENSDARG00000019484	zdhhc7	ENSDART00000020233			ENSDARG00000019484.9
CNE14_1_q0.3_peak_23116	chr16	10776425	10776798	+	1075	NA	promoter-TSS (ENSDART00000161969.3)	-promoter-TSS (ENSDART00000161969.3)	-77	ENSDART00000161969.3	ENSDARG00000104139	atp1a3b	ENSDART00000169057			ENSDARG00000104139.3
CNE14_1_q0.3_peak_68090	chr5	69436899	69437423	+	1075	NA	exon (ENSDART00000073676.5, exon 1 of 4)	-exon (ENSDART00000073676.5, exon 1 of 4)	261	ENSDART00000073676.5	ENSDARG00000051956	isca1	ENSDART00000073676			ENSDARG00000051956.5
CNE14_1_q0.3_peak_47078	chr22	21189981	21241424	+	1074	NA	Intergenic	Intergenic	-37088	ENSDART00000079046.5	ENSDARG00000056530	cpamd8	ENSDART00000079046			ENSDARG00000056530.7
CNE14_1_q0.3_peak_38278	chr2	56239310	56239864	+	1074	NA	Intergenic	Intergenic	25893	ENSDART00000162582.2	ENSDARG00000016302	upf1	ENSDART00000021011			ENSDARG00000016302.12
CNE14_1_q0.3_peak_74999	chr7	52887227	52887770	+	1074	NA	promoter-TSS (ENSDART00000109973.5)	-promoter-TSS (ENSDART00000109973.5)	-203	ENSDART00000109973.5	ENSDARG00000079000	tp53bp1	ENSDART00000109973			ENSDARG00000079000.5
CNE14_1_q0.3_peak_12621	chr13	2307631	2308540	+	1074	NA	Intergenic	Intergenic	-24909	ENSDART00000158462.2	ENSDARG00000102684	lrrc1	ENSDART00000158462			ENSDARG00000102684.2
CNE14_1_q0.3_peak_4994	chr10	16592886	16593309	+	1073	NA	exon (ENSDART00000101142.5, exon 1 of 3)	-exon (ENSDART00000101142.5, exon 1 of 3)	179	ENSDART00000101142.5	ENSDARG00000069472	chsy3	ENSDART00000187508			ENSDARG00000069472.5
CNE14_1_q0.3_peak_33583	chr19	26769780	26770212	+	1073	NA	promoter-TSS (ENSDART00000043776.6)	-promoter-TSS (ENSDART00000043776.6)	-78	ENSDART00000138675.3	ENSDARG00000031494	prrc2a	ENSDART00000138675			ENSDARG00000031494.9
CNE14_1_q0.3_peak_74985	chr7	52558220	52558730	+	1072	NA	promoter-TSS (ENSDART00000009938.11)	-promoter-TSS (ENSDART00000009938.11)	12	ENSDART00000174049.2	ENSDARG00000004714	tcf12	ENSDART00000174292			ENSDARG00000004714.13
CNE14_1_q0.3_peak_60045	chr3	55646465	55647011	+	1072	NA	intron (ENSDART00000162413.2, intron 2 of 10)	-intron (ENSDART00000157879.2, intron 2 of 2)	2581	ENSDART00000176127.2	ENSDARG00000100149	axin2	ENSDART00000176127			ENSDARG00000100149.3
CNE14_1_q0.3_peak_31008	chr18	37319990	37320559	+	1070	NA	intron (ENSDART00000098914.5, intron 2 of 7)	-intron (ENSDART00000098914.5, intron 2 of 7)	35392	ENSDART00000098914.5	ENSDARG00000068401	yap1	ENSDART00000098914			ENSDARG00000068401.5
CNE14_1_q0.3_peak_28332	chr17	48935524	48936059	+	1068	NA	exon (ENSDART00000024379.7, exon 1 of 6)	-exon (ENSDART00000024379.7, exon 1 of 6)	332	ENSDART00000024379.7	ENSDARG00000006840	gnmt	ENSDART00000024379			ENSDARG00000006840.7
CNE14_1_q0.3_peak_77901	chr8	16464266	16464613	+	1068	NA	promoter-TSS (ENSDART00000098691.5)	-promoter-TSS (ENSDART00000098691.5)	14	ENSDART00000098691.5	ENSDARG00000040635	rnf11b	ENSDART00000098691			ENSDARG00000040635.7
CNE14_1_q0.3_peak_14737	chr13	46631121	46631780	+	1068	NA	intron (ENSDART00000169106.2, intron 3 of 7)	-intron (ENSDART00000158202.2, intron 3 of 6)	55647	ENSDART00000158202.2	ENSDARG00000103813	ate1	ENSDART00000169106			ENSDARG00000103813.2
CNE14_1_q0.3_peak_57388	chr3	1096528	1097398	+	1068	NA	intron (ENSDART00000132817.2, intron 1 of 2)	-intron (ENSDART00000132817.2, intron 1 of 2)	132	ENSDART00000132817.2	ENSDARG00000075173	si.ch1073.322p19.1	ENSDART00000132817			ENSDARG00000075173.5
CNE14_1_q0.3_peak_78059	chr8	20157435	20157822	+	1068	NA	promoter-TSS (ENSDART00000124809.4)	-promoter-TSS (ENSDART00000124809.4)	-170	ENSDART00000124809.4	ENSDARG00000004094	acsbg2	ENSDART00000012120			ENSDARG00000004094.12
CNE14_1_q0.3_peak_49881	chr23	9863035	9864033	+	1067	NA	exon (ENSDART00000124510.4, exon 1 of 20)	-exon (ENSDART00000124510.4, exon 1 of 20)	632	ENSDART00000124510.4	ENSDARG00000011932	prkcbp1l	ENSDART00000124510			ENSDARG00000011932.11
CNE14_1_q0.3_peak_68202	chr5	70155771	70156144	+	1067	NA	promoter-TSS (ENSDART00000165570.2)	-promoter-TSS (ENSDART00000165570.2)	22	ENSDART00000165570.2	ENSDARG00000099746	rgs3a	ENSDART00000165570			ENSDARG00000099746.2
CNE14_1_q0.3_peak_82372	chr9	36924045	36924507	+	1067	NA	exon (ENSDART00000059756.5, exon 1 of 5)	-exon (ENSDART00000059756.5, exon 1 of 5)	112	ENSDART00000059756.5	ENSDARG00000040778	ralba	ENSDART00000059756			ENSDARG00000040778.5
CNE14_1_q0.3_peak_18802	chr15	419197	420368	+	1066	NA	promoter-TSS (ENSDART00000058993.7)	-promoter-TSS (ENSDART00000058993.7)	-185	ENSDART00000058993.7	ENSDARG00000040314	psph	ENSDART00000058993			ENSDARG00000040314.7
CNE14_1_q0.3_peak_15113	chr13	48853433	48854055	+	1066	NA	Intergenic	Intergenic	-49201	ENSDART00000182033.1	ENSDARG00000114527	#N/A	ENSDART00000182033			ENSDARG00000114527.1
CNE14_1_q0.3_peak_58662	chr3	21010854	21011176	+	1065	NA	promoter-TSS (ENSDART00000109578.4)	-promoter-TSS (ENSDART00000109578.4)	-36	ENSDART00000109578.4	ENSDARG00000078640	fam117aa	ENSDART00000109578			ENSDARG00000078640.4
CNE14_1_q0.3_peak_31003	chr18	37251778	37252163	+	1065	NA	promoter-TSS (ENSDART00000132230.2)	-promoter-TSS (ENSDART00000132230.2)	66	ENSDART00000132230.2	ENSDARG00000068406	six5	ENSDART00000132230			ENSDARG00000068406.5
CNE14_1_q0.3_peak_29183	chr18	460653	461005	+	1065	NA	intron (ENSDART00000157564.2, intron 2 of 7)	-intron (ENSDART00000157564.2, intron 2 of 7)	-16661	ENSDART00000170389.2	ENSDARG00000103607	wtip	ENSDART00000157564			ENSDARG00000103607.2
CNE14_1_q0.3_peak_58383	chr3	13184389	13184715	+	1064	NA	Intergenic	Intergenic	-5460	ENSDART00000109876.4	ENSDARG00000055350	sun1	ENSDART00000109876			ENSDARG00000055350.8
CNE14_1_q0.3_peak_20367	chr15	20731204	20731781	+	1063	NA	promoter-TSS (ENSDART00000114464.4)	-promoter-TSS (ENSDART00000114464.4)	146	ENSDART00000170616.3	ENSDARG00000073872	tpst1	ENSDART00000114464			ENSDARG00000073872.8
CNE14_1_q0.3_peak_45471	chr21	43669706	43670245	+	1063	NA	promoter-TSS (ENSDART00000136025.3)	-promoter-TSS (ENSDART00000136025.3)	32	ENSDART00000136025.3	ENSDARG00000077547	tmlhe	ENSDART00000136025			ENSDARG00000077547.6
CNE14_1_q0.3_peak_24054	chr16	33676569	33677004	+	1063	NA	intron (ENSDART00000143757.2, intron 1 of 5)	-intron (ENSDART00000143757.2, intron 1 of 5)	20896	ENSDART00000143757.2	ENSDARG00000034643	fhl3a	ENSDART00000144874			ENSDARG00000034643.7
CNE14_1_q0.3_peak_84702	chrKZ116008.1	15806	16627	+	1062	NA	NA	NA	NA	NA
CNE14_1_q0.3_peak_10704	chr12	20303226	20303607	+	1061	NA	promoter-TSS (ENSDART00000153057.2)	-promoter-TSS (ENSDART00000153057.2)	22	ENSDART00000153057.2	ENSDARG00000017367	rhbdf1b	ENSDART00000153057			ENSDARG00000017367.10
CNE14_1_q0.3_peak_36827	chr2	35880211	35881259	+	1061	NA	exon (ENSDART00000004277.8, exon 1 of 28)	-exon (ENSDART00000004277.8, exon 1 of 28)	135	ENSDART00000004277.8	ENSDARG00000036279	lamc1	ENSDART00000004277			ENSDARG00000036279.6
CNE14_1_q0.3_peak_50737	chr23	25798006	25798332	+	1061	NA	promoter-TSS (ENSDART00000041833.6)	-promoter-TSS (ENSDART00000041833.6)	-70	ENSDART00000041833.6	ENSDARG00000034568	fitm2	ENSDART00000041833			ENSDARG00000034568.6
CNE14_1_q0.3_peak_26419	chr17	5060835	5061545	+	1061	NA	promoter-TSS (ENSDART00000064313.8)	-promoter-TSS (ENSDART00000064313.8)	55	ENSDART00000064313.8	ENSDARG00000043797	cdc5l	ENSDART00000064313			ENSDARG00000043797.8
CNE14_1_q0.3_peak_64294	chr5	1107948	1108674	+	1061	NA	promoter-TSS (ENSDART00000166268.2)	-promoter-TSS (ENSDART00000166268.2)	-787	ENSDART00000166268.2	ENSDARG00000103525	ythdc2	ENSDART00000166268			ENSDARG00000103525.2
CNE14_1_q0.3_peak_53283	chr24	24797321	24797727	+	1061	NA	promoter-TSS (ENSDART00000138741.4)	-promoter-TSS (ENSDART00000138741.4)	-69	ENSDART00000138741.4	ENSDARG00000045305	pde7a	ENSDART00000138741			ENSDARG00000045305.9
CNE14_1_q0.3_peak_70525	chr6	34860343	34860757	+	1060	NA	promoter-TSS (ENSDART00000073957.5)	-promoter-TSS (ENSDART00000073957.5)	24	ENSDART00000073957.5	ENSDARG00000011973	slc35d1a	ENSDART00000073957			ENSDARG00000011973.10
CNE14_1_q0.3_peak_9890	chr12	2749105	2749494	+	1060	NA	Intergenic	Intergenic	51510	ENSDART00000152682.2	ENSDARG00000079623	ubtd1b	ENSDART00000083784			ENSDARG00000079623.6
CNE14_1_q0.3_peak_42708	chr20	54586516	54661222	+	1060	NA	Intergenic	Intergenic	-42353	ENSDART00000166592.2	ENSDARG00000102965	LOC100331694	ENSDART00000166592			ENSDARG00000102965.2
CNE14_1_q0.3_peak_53732	chr24	35637523	35637957	+	1059	NA	Intergenic	Intergenic	61704	ENSDART00000166567.2	ENSDARG00000099943	mapre2	ENSDART00000165199			ENSDARG00000099943.2
CNE14_1_q0.3_peak_12123	chr12	48803014	48803566	+	1059	NA	exon (ENSDART00000074768.6, exon 1 of 6)	-exon (ENSDART00000074768.6, exon 1 of 6)	192	ENSDART00000074768.6	ENSDARG00000052842	ppifb	ENSDART00000074768			ENSDARG00000052842.8
CNE14_1_q0.3_peak_53281	chr24	24769358	24769679	+	1058	NA	intron (ENSDART00000138741.4, intron 1 of 12)	-intron (ENSDART00000138741.4, intron 1 of 12)	27065	ENSDART00000144791.2	ENSDARG00000045305	pde7a	ENSDART00000138741			ENSDARG00000045305.9
CNE14_1_q0.3_peak_76680	chr8	537651	538025	+	1058	NA	promoter-TSS (ENSDART00000051776.5)	-promoter-TSS (ENSDART00000051776.5)	29	ENSDART00000051776.5	ENSDARG00000035699	srp19	ENSDART00000051776			ENSDARG00000035699.5
CNE14_1_q0.3_peak_33782	chr19	32943806	32944332	+	1057	NA	promoter-TSS (ENSDART00000137611.3)	-promoter-TSS (ENSDART00000137611.3)	-19	ENSDART00000137611.3	ENSDARG00000035869	azin1b	ENSDART00000179947			ENSDARG00000035869.6
CNE14_1_q0.3_peak_7147	chr11	6115403	6115804	+	1057	NA	promoter-TSS (ENSDART00000027666.11)	-promoter-TSS (ENSDART00000027666.11)	-18	ENSDART00000165031.2	ENSDARG00000003165	nr2f6b	ENSDART00000027666			ENSDARG00000003165.13
CNE14_1_q0.3_peak_27012	chr17	17804474	17805058	+	1057	NA	promoter-TSS (ENSDART00000123350.3)	-promoter-TSS (ENSDART00000123350.3)	14	ENSDART00000123350.3	ENSDARG00000018976	sptlc2a	ENSDART00000148521			ENSDARG00000018976.12
CNE14_1_q0.3_peak_64280	chr5	1054532	1055270	+	1057	NA	promoter-TSS (ENSDART00000046781.7)	-promoter-TSS (ENSDART00000046781.7)	-141	ENSDART00000046781.7	ENSDARG00000032997	rnf185	ENSDART00000164808			ENSDARG00000032997.7
CNE14_1_q0.3_peak_13335	chr13	11378082	11378484	+	1057	NA	promoter-TSS (ENSDART00000158632.2)	-promoter-TSS (ENSDART00000158632.2)	11	ENSDART00000166811.2	ENSDARG00000104810	akt3a	ENSDART00000163206			ENSDARG00000104810.2
CNE14_1_q0.3_peak_82872	chr9	47795771	47796345	+	1056	NA	Intergenic	Intergenic	-141854	ENSDART00000015159.9	ENSDARG00000020845	tns1b	ENSDART00000148129			ENSDARG00000020845.10
CNE14_1_q0.3_peak_61352	chr4	8202380	8202769	+	1056	NA	intron (ENSDART00000150830.3, intron 1 of 3)	-intron (ENSDART00000150830.3, intron 1 of 3)	-10489	ENSDART00000027829.10	ENSDARG00000076014	erc1b	ENSDART00000148440			ENSDARG00000076014.6
CNE14_1_q0.3_peak_55279	chr25	6048996	6049633	+	1056	NA	promoter-TSS (ENSDART00000075184.7)	-promoter-TSS (ENSDART00000075184.7)	25	ENSDART00000075184.7	ENSDARG00000071031	snx1a	ENSDART00000075184			ENSDARG00000071031.6
CNE14_1_q0.3_peak_47621	chr22	31719799	31808969	+	1055	NA	Intergenic	Intergenic	-11447	ENSDART00000169611.2	ENSDARG00000113244	#N/A	ENSDART00000169611			ENSDARG00000113244.1
CNE14_1_q0.3_peak_84206	chrKN150037.1	1658	2578	+	1055	NA	NA	NA	NA	NA
CNE14_1_q0.3_peak_57296	chr3	336348	336818	+	1055	NA	promoter-TSS (ENSDART00000105021.5)	-promoter-TSS (ENSDART00000105021.5)	-284	ENSDART00000105021.5	ENSDARG00000088022	mhc1zfa	ENSDART00000105021			ENSDARG00000088022.4
CNE14_1_q0.3_peak_79548	chr8	50726957	50727272	+	1055	NA	promoter-TSS (ENSDART00000127062.3)	-promoter-TSS (ENSDART00000127062.3)	-106	ENSDART00000127062.3	ENSDARG00000089156	egr3	ENSDART00000127062			ENSDARG00000089156.3
CNE14_1_q0.3_peak_45735	chr21	45510378	45510810	+	1055	NA	promoter-TSS (ENSDART00000167914.2)	-promoter-TSS (ENSDART00000167914.2)	56	ENSDART00000167914.2	ENSDARG00000102171	fnip1	ENSDART00000167914			ENSDARG00000102171.2
CNE14_1_q0.3_peak_58501	chr3	16663985	16664456	+	1055	NA	promoter-TSS (ENSDART00000013816.8)	-promoter-TSS (ENSDART00000013816.8)	8	ENSDART00000013816.8	ENSDARG00000013161	zgc.55558	ENSDART00000100961			ENSDARG00000013161.10
CNE14_1_q0.3_peak_33662	chr19	29294212	29294658	+	1053	NA	promoter-TSS (ENSDART00000103437.4)	-promoter-TSS (ENSDART00000103437.4)	22	ENSDART00000103437.4	ENSDARG00000070463	e2f3	ENSDART00000103437			ENSDARG00000070463.6
CNE14_1_q0.3_peak_44643	chr21	33229739	33230237	+	1053	NA	promoter-TSS (ENSDART00000003983.10)	-promoter-TSS (ENSDART00000003983.10)	-38	ENSDART00000003983.10	ENSDARG00000010238	rbm22	ENSDART00000003983			ENSDARG00000010238.10
CNE14_1_q0.3_peak_58473	chr3	15892881	15893198	+	1052	NA	promoter-TSS (ENSDART00000055780.8)	-promoter-TSS (ENSDART00000055780.8)	0	ENSDART00000055780.8	ENSDARG00000034427	jpt2	ENSDART00000055780			ENSDARG00000034427.9
CNE14_1_q0.3_peak_11457	chr12	41759291	41759859	+	1052	NA	exon (ENSDART00000165152.2, exon 1 of 10)	-exon (ENSDART00000165152.2, exon 1 of 10)	111	ENSDART00000172175.2	ENSDARG00000102009	ppp2r2d	ENSDART00000165152			ENSDARG00000102009.2
CNE14_1_q0.3_peak_42814	chr21	308430	309465	+	1052	NA	promoter-TSS (ENSDART00000151613.2)	-promoter-TSS (ENSDART00000151613.2)	-95	ENSDART00000151613.2	ENSDARG00000009653	lhfpl2a	ENSDART00000151613			ENSDARG00000009653.10
CNE14_1_q0.3_peak_38252	chr2	56136688	56137097	+	1052	NA	Intergenic	Intergenic	-3049	ENSDART00000164741.2	ENSDARG00000054666	pgpep1	ENSDART00000164741			ENSDARG00000054666.3
CNE14_1_q0.3_peak_2209	chr1	38815371	38815715	+	1052	NA	promoter-TSS (ENSDART00000148572.2)	-promoter-TSS (ENSDART00000148572.2)	-68	ENSDART00000149080.3	ENSDARG00000053222	asb5b	ENSDART00000149809			ENSDARG00000053222.9
CNE14_1_q0.3_peak_2849	chr1	54191184	54191539	+	1051	NA	exon (ENSDART00000062941.6, exon 1 of 7)	-exon (ENSDART00000062941.6, exon 1 of 7)	265	ENSDART00000062941.6	ENSDARG00000042881	nthl1	ENSDART00000062941			ENSDARG00000042881.6
CNE14_1_q0.3_peak_5081	chr10	18910941	18911563	+	1051	NA	promoter-TSS (ENSDART00000030205.7)	-promoter-TSS (ENSDART00000030205.7)	77	ENSDART00000135786.2	ENSDARG00000028067	bnip3lb	ENSDART00000135786			ENSDARG00000028067.7
CNE14_1_q0.3_peak_4325	chr10	5821407	5821888	+	1051	NA	promoter-TSS (ENSDART00000166388.2)	-promoter-TSS (ENSDART00000166388.2)	-63	ENSDART00000166388.2	ENSDARG00000104693	il6st	ENSDART00000161903			ENSDARG00000104693.2
CNE14_1_q0.3_peak_42627	chr20	54197853	54198314	+	1051	NA	promoter-TSS (ENSDART00000160409.2)	-promoter-TSS (ENSDART00000160409.2)	47	ENSDART00000160409.2	ENSDARG00000101626	arf6a	ENSDART00000160409			ENSDARG00000101626.2
CNE14_1_q0.3_peak_24103	chr16	35515298	35515640	+	1050	NA	intron (ENSDART00000193209.1, intron 1 of 16)	-intron (ENSDART00000193209.1, intron 1 of 16)	17468	ENSDART00000193209.1	ENSDARG00000098386	ctps1b	ENSDART00000172294			ENSDARG00000098386.2
CNE14_1_q0.3_peak_5053	chr10	17936282	17936749	+	1050	NA	promoter-TSS (ENSDART00000064866.5)	-promoter-TSS (ENSDART00000064866.5)	33	ENSDART00000064866.5	ENSDARG00000044183	prkab1a	ENSDART00000146489			ENSDARG00000044183.6
CNE14_1_q0.3_peak_73391	chr7	11387929	11388505	+	1050	NA	Intergenic	Intergenic	-2245	ENSDART00000114383.3	ENSDARG00000079017	tlnrd1	ENSDART00000114383			ENSDARG00000079017.3
CNE14_1_q0.3_peak_15504	chr13	51737879	51738331	+	1050	NA	Intergenic	Intergenic	27380	ENSDART00000163741.3	ENSDARG00000101080	pwwp2b	ENSDART00000163741			ENSDARG00000101080.3
CNE14_1_q0.3_peak_10558	chr12	16346821	16347233	+	1049	NA	intron (ENSDART00000086984.8, intron 18 of 20)	-intron (ENSDART00000086984.8, intron 18 of 20)	33215	ENSDART00000168105.3	ENSDARG00000061194	hectd2	ENSDART00000152133			ENSDARG00000061194.9
CNE14_1_q0.3_peak_31073	chr18	38816917	38817581	+	1049	NA	intron (ENSDART00000184332.1, intron 1 of 11)	-intron (ENSDART00000129750.3, intron 1 of 11)	10010	ENSDART00000184332.1	ENSDARG00000040452	fam214a	ENSDART00000184332			ENSDARG00000040452.7
CNE14_1_q0.3_peak_76178	chr7	71503892	71504287	+	1049	NA	exon (ENSDART00000100396.5, exon 1 of 3)	-exon (ENSDART00000100396.5, exon 1 of 3)	733	ENSDART00000100396.5	ENSDARG00000069135	ppp1r15a	ENSDART00000100396			ENSDARG00000069135.5
CNE14_1_q0.3_peak_53728	chr24	35564426	35565040	+	1049	NA	promoter-TSS (ENSDART00000122734.3)	-promoter-TSS (ENSDART00000122734.3)	65	ENSDART00000122734.3	ENSDARG00000087303	cebpd	ENSDART00000122734			ENSDARG00000087303.3
CNE14_1_q0.3_peak_73468	chr7	12220220	12220713	+	1048	NA	intron (ENSDART00000161679.3, intron 15 of 20)	-intron (ENSDART00000161679.3, intron 15 of 20)	48337	ENSDART00000117142.2	ENSDARG00000082308	#N/A	ENSDART00000117142			ENSDARG00000082308.2
CNE14_1_q0.3_peak_20501	chr15	23206580	23207247	+	1048	NA	promoter-TSS (ENSDART00000110360.4)	-promoter-TSS (ENSDART00000110360.4)	-330	ENSDART00000155139.2	ENSDARG00000077161	ccdc153	ENSDART00000110360			ENSDARG00000077161.4
CNE14_1_q0.3_peak_81093	chr9	6997801	6998255	+	1048	NA	promoter-TSS (ENSDART00000092480.7)	-promoter-TSS (ENSDART00000092480.7)	-54	ENSDART00000092480.7	ENSDARG00000063352	inpp4aa	ENSDART00000135576			ENSDARG00000063352.8
CNE14_1_q0.3_peak_19650	chr15	5901454	5902190	+	1047	NA	promoter-TSS (ENSDART00000114134.5)	-promoter-TSS (ENSDART00000114134.5)	-148	ENSDART00000114134.5	ENSDARG00000074271	get1	ENSDART00000114134			ENSDARG00000074271.5
CNE14_1_q0.3_peak_20524	chr15	23942533	23942986	+	1047	NA	exon (ENSDART00000002824.10, exon 1 of 13)	-exon (ENSDART00000002824.10, exon 1 of 13)	102	ENSDART00000002824.10	ENSDARG00000007566	appbp2	ENSDART00000137569			ENSDARG00000007566.11
CNE14_1_q0.3_peak_72611	chr7	2115969	2116503	+	1047	NA	intron (ENSDART00000098148.6, intron 1 of 12)	-intron (ENSDART00000098148.6, intron 1 of 12)	276	ENSDART00000173624.2	ENSDARG00000068030	si.cabz01007802.1	ENSDART00000183166			ENSDARG00000068030.6
CNE14_1_q0.3_peak_23933	chr16	30655898	30656321	+	1046	NA	promoter-TSS (ENSDART00000146508.2)	-promoter-TSS (ENSDART00000146508.2)	-129	ENSDART00000146508.2	ENSDARG00000054941	ldlrad4b	ENSDART00000146508			ENSDARG00000054941.7
CNE14_1_q0.3_peak_39657	chr20	4984289	4984822	+	1045	NA	intron (ENSDART00000181655.1, intron 4 of 19)	-intron (ENSDART00000138818.4, intron 4 of 20)	-66634	ENSDART00000152802.2	ENSDARG00000096608	#N/A	ENSDART00000152802			ENSDARG00000096608.2
CNE14_1_q0.3_peak_21061	chr15	37265216	37265569	+	1045	NA	intron (ENSDART00000194878.1, intron 1 of 12)	-intron (ENSDART00000194878.1, intron 1 of 12)	-1127	ENSDART00000194958.1	ENSDARG00000117594	#N/A	ENSDART00000194958			ENSDARG00000117594.1
CNE14_1_q0.3_peak_67288	chr5	55625203	55625520	+	1044	NA	promoter-TSS (ENSDART00000132290.2)	-promoter-TSS (ENSDART00000132290.2)	-114	ENSDART00000133156.3	ENSDARG00000007034	hnrpkl	ENSDART00000133156			ENSDARG00000007034.12
CNE14_1_q0.3_peak_18593	chr14	51045946	51046435	+	1043	NA	Intergenic	Intergenic	-6488	ENSDART00000178932.2	ENSDARG00000052368	cltb	ENSDART00000178932			ENSDARG00000052368.8
CNE14_1_q0.3_peak_63099	chr4	58846602	58847165	+	1043	NA	promoter-TSS (ENSDART00000170777.2)	-promoter-TSS (ENSDART00000170777.2)	-638	ENSDART00000170777.2	ENSDARG00000104888	#N/A	ENSDART00000170777			ENSDARG00000104888.2
CNE14_1_q0.3_peak_19408	chr15	3908063	3908589	+	1042	NA	intron (ENSDART00000183315.1, intron 3 of 5)	-intron (ENSDART00000183315.1, intron 3 of 5)	32345	ENSDART00000189741.1	ENSDARG00000112337	mindy4b	ENSDART00000189741			ENSDARG00000112337.1
CNE14_1_q0.3_peak_35249	chr2	3045804	3046149	+	1041	NA	promoter-TSS (ENSDART00000105818.5)	-promoter-TSS (ENSDART00000105818.5)	-113	ENSDART00000187575.1	ENSDARG00000030340	guk1a	ENSDART00000186795			ENSDARG00000030340.9
CNE14_1_q0.3_peak_32038	chr18	50026401	50026720	+	1041	NA	intron (ENSDART00000126916.5, intron 1 of 4)	-intron (ENSDART00000126916.5, intron 1 of 4)	56845	ENSDART00000098668.5	ENSDARG00000077007	abcc8b	ENSDART00000182215			ENSDARG00000077007.5
CNE14_1_q0.3_peak_70002	chr6	22025654	22026124	+	1041	NA	promoter-TSS (ENSDART00000151240.2)	-promoter-TSS (ENSDART00000151240.2)	83	ENSDART00000151240.2	ENSDARG00000052351	si.dkey.156n14.3	ENSDART00000151240			ENSDARG00000052351.8
CNE14_1_q0.3_peak_11079	chr12	31673333	31673775	+	1041	NA	promoter-TSS (ENSDART00000152971.2)	-promoter-TSS (ENSDART00000152971.2)	-34	ENSDART00000152971.2	ENSDARG00000074121	dnmbp	ENSDART00000183645			ENSDARG00000074121.5
CNE14_1_q0.3_peak_42989	chr21	1372667	1373269	+	1040	NA	intron (ENSDART00000176557.2, intron 2 of 11)	-intron (ENSDART00000176557.2, intron 2 of 11)	-5282	ENSDART00000186912.1	ENSDARG00000107408	#N/A	ENSDART00000184516			ENSDARG00000107408.2
CNE14_1_q0.3_peak_2112	chr1	35697975	35698470	+	1040	NA	Intergenic	Intergenic	-2498	ENSDART00000176451.2	ENSDARG00000094485	si.dkey.27h10.2	ENSDART00000136157			ENSDARG00000094485.5
CNE14_1_q0.3_peak_33599	chr19	27448391	27449207	+	1039	NA	promoter-TSS (ENSDART00000079251.5)	-promoter-TSS (ENSDART00000079251.5)	174	ENSDART00000052352.5	ENSDARG00000036063	ppp1r11	ENSDART00000052352			ENSDARG00000036063.5
CNE14_1_q0.3_peak_23963	chr16	31452209	31452599	+	1039	NA	promoter-TSS (ENSDART00000008297.10)	-promoter-TSS (ENSDART00000008297.10)	12	ENSDART00000140880.2	ENSDARG00000002082	csnk2a1	ENSDART00000147373			ENSDARG00000002082.10
CNE14_1_q0.3_peak_35946	chr2	13167233	13544234	+	1038	NA	Intergenic	Intergenic	-21742	ENSDART00000168258.2	ENSDARG00000069175	vps4b	ENSDART00000127693			ENSDARG00000069175.6
CNE14_1_q0.3_peak_42819	chr21	434920	435951	+	1037	NA	promoter-TSS (ENSDART00000110297.4)	-promoter-TSS (ENSDART00000110297.4)	31	ENSDART00000110297.4	ENSDARG00000079922	klf4	ENSDART00000110297			ENSDARG00000079922.4
CNE14_1_q0.3_peak_45987	chr22	1245096	1245452	+	1037	NA	promoter-TSS (ENSDART00000161292.2)	-promoter-TSS (ENSDART00000161292.2)	-48	ENSDART00000161292.2	ENSDARG00000104491	ampd2a	ENSDART00000169746			ENSDARG00000104491.3
CNE14_1_q0.3_peak_67668	chr5	63644684	63645058	+	1036	NA	promoter-TSS (ENSDART00000050865.5)	-promoter-TSS (ENSDART00000050865.5)	67	ENSDART00000050865.5	ENSDARG00000035131	surf4l	ENSDART00000050865			ENSDARG00000035131.5
CNE14_1_q0.3_peak_68614	chr6	315153	315588	+	1036	NA	intron (ENSDART00000073985.5, intron 1 of 11)	-intron (ENSDART00000073985.5, intron 1 of 11)	19240	ENSDART00000073985.5	ENSDARG00000052182	rbfox2	ENSDART00000073985			ENSDARG00000052182.5
CNE14_1_q0.3_peak_58980	chr3	30909222	30909668	+	1036	NA	promoter-TSS (ENSDART00000025046.7)	-promoter-TSS (ENSDART00000025046.7)	42	ENSDART00000025046.7	ENSDARG00000003486	ppp1caa	ENSDART00000025046			ENSDARG00000003486.7
CNE14_1_q0.3_peak_51818	chr23	45538805	45539320	+	1035	NA	exon (ENSDART00000135602.3, exon 1 of 5)	-exon (ENSDART00000135602.3, exon 1 of 5)	130	ENSDART00000135602.3	ENSDARG00000092260	si.ch73.290k24.6	ENSDART00000135602			ENSDARG00000092260.5
CNE14_1_q0.3_peak_40795	chr20	24081177	24081750	+	1035	NA	intron (ENSDART00000135292.3, intron 1 of 1)	-intron (ENSDART00000131857.3, intron 2 of 5)	41281	ENSDART00000135292.3	ENSDARG00000004074	bach2b	ENSDART00000131857			ENSDARG00000004074.8
CNE14_1_q0.3_peak_10902	chr12	26382995	26383422	+	1035	NA	promoter-TSS (ENSDART00000152941.2)	-promoter-TSS (ENSDART00000152941.2)	34	ENSDART00000152941.2	ENSDARG00000077749	usp54b	ENSDART00000152941			ENSDARG00000077749.6
CNE14_1_q0.3_peak_67632	chr5	63109292	63109717	+	1034	NA	promoter-TSS (ENSDART00000115128.4)	-promoter-TSS (ENSDART00000115128.4)	-272	ENSDART00000115128.4	ENSDARG00000074120	usp2b	ENSDART00000115128			ENSDARG00000074120.4
CNE14_1_q0.3_peak_69285	chr6	6975162	6976322	+	1034	NA	intron (ENSDART00000177960.2, intron 1 of 3)	-intron (ENSDART00000039443.9, intron 1 of 3)	354	ENSDART00000151822.2	ENSDARG00000006260	tuba8l4	ENSDART00000151822			ENSDARG00000006260.13
CNE14_1_q0.3_peak_29187	chr18	507544	508207	+	1034	NA	promoter-TSS (ENSDART00000189701.1)	-promoter-TSS (ENSDART00000189701.1)	40	ENSDART00000189701.1	ENSDARG00000099843	nedd4a	ENSDART00000159464			ENSDARG00000099843.2
CNE14_1_q0.3_peak_70849	chr6	44206247	44206568	+	1034	NA	exon (ENSDART00000075486.6, exon 9 of 9)	-exon (ENSDART00000075486.6, exon 9 of 9)	9059	ENSDART00000075486.6	ENSDARG00000053447	ppp4r2b	ENSDART00000075486			ENSDARG00000053447.8
CNE14_1_q0.3_peak_15572	chr14	21955	22642	+	1033	NA	intron (ENSDART00000051893.7, intron 1 of 10)	-intron (ENSDART00000051893.7, intron 1 of 10)	1947	ENSDART00000051893.7	ENSDARG00000035763	stx18	ENSDART00000051893			ENSDARG00000035763.7
CNE14_1_q0.3_peak_78868	chr8	41518769	41519209	+	1033	NA	promoter-TSS (ENSDART00000019858.8)	-promoter-TSS (ENSDART00000019858.8)	66	ENSDART00000019858.8	ENSDARG00000008979	golga1	ENSDART00000019858			ENSDARG00000008979.10
CNE14_1_q0.3_peak_60997	chr4	308510	308900	+	1033	NA	promoter-TSS (ENSDART00000067489.7)	-promoter-TSS (ENSDART00000067489.7)	-2	ENSDART00000067489.7	ENSDARG00000045914	si.ch211.51e12.7	ENSDART00000174021			ENSDARG00000045914.9
CNE14_1_q0.3_peak_23845	chr16	27564130	27564503	+	1033	NA	promoter-TSS (ENSDART00000078297.5)	-promoter-TSS (ENSDART00000078297.5)	46	ENSDART00000140460.3	ENSDARG00000076752	tmem67	ENSDART00000140460			ENSDARG00000076752.5
CNE14_1_q0.3_peak_59249	chr3	37722670	37723038	+	1032	NA	intron (ENSDART00000151236.3, intron 1 of 15)	-intron (ENSDART00000151236.3, intron 1 of 15)	15422	ENSDART00000151236.3	ENSDARG00000074060	map3k14a	ENSDART00000151236			ENSDARG00000074060.5
CNE14_1_q0.3_peak_40072	chr20	7381607	7382463	+	1032	NA	Intergenic	Intergenic	-16055	ENSDART00000108649.4	ENSDARG00000074185	pcsk9	ENSDART00000108649			ENSDARG00000074185.4
CNE14_1_q0.3_peak_54992	chr25	3058585	3058918	+	1032	NA	promoter-TSS (ENSDART00000029580.6)	-promoter-TSS (ENSDART00000029580.6)	-64	ENSDART00000149117.3	ENSDARG00000093773	si.ch1073.296i8.2	ENSDART00000137950			ENSDARG00000093773.5
CNE14_1_q0.3_peak_67902	chr5	68495479	68496184	+	1032	NA	promoter-TSS (ENSDART00000187955.1)	-promoter-TSS (ENSDART00000187955.1)	136	ENSDART00000188107.1	ENSDARG00000100725	ephb4a	ENSDART00000187955			ENSDARG00000100725.2
CNE14_1_q0.3_peak_41223	chr20	37982288	37982683	+	1032	NA	Intergenic	Intergenic	-48170	ENSDART00000152989.2	ENSDARG00000016743	angel2	ENSDART00000152989			ENSDARG00000016743.12
CNE14_1_q0.3_peak_10565	chr12	16451976	16452616	+	1031	NA	promoter-TSS (ENSDART00000037601.5)	-promoter-TSS (ENSDART00000037601.5)	-96	ENSDART00000037601.5	ENSDARG00000027428	rpp30	ENSDART00000149679			ENSDARG00000027428.6
CNE14_1_q0.3_peak_38624	chr2	57940453	57941152	+	1031	NA	exon (ENSDART00000131420.2, exon 1 of 4)	-exon (ENSDART00000131420.2, exon 1 of 4)	235	ENSDART00000131420.2	ENSDARG00000079930	si.dkeyp.68b7.5	ENSDART00000131420			ENSDARG00000079930.5
CNE14_1_q0.3_peak_59196	chr3	36645930	36646675	+	1031	NA	exon (ENSDART00000159948.2, exon 1 of 14)	-exon (ENSDART00000159948.2, exon 1 of 14)	205	ENSDART00000159948.2	ENSDARG00000098627	gspt1l	ENSDART00000159948			ENSDARG00000098627.2
CNE14_1_q0.3_peak_77747	chr8	12208853	12209706	+	1031	NA	promoter-TSS (ENSDART00000132824.2)	-promoter-TSS (ENSDART00000132824.2)	81	ENSDART00000132824.2	ENSDARG00000069484	dab2ipa	ENSDART00000132824			ENSDARG00000069484.6
CNE14_1_q0.3_peak_20705	chr15	29241972	29242542	+	1031	NA	intron (ENSDART00000156122.2, intron 3 of 4)	-intron (ENSDART00000156122.2, intron 3 of 4)	-34251	ENSDART00000126559.3	ENSDARG00000061551	rap1gap2a	ENSDART00000170537			ENSDARG00000061551.7
CNE14_1_q0.3_peak_51389	chr23	40908541	40908994	+	1030	NA	exon (ENSDART00000180933.1, exon 1 of 2)	-exon (ENSDART00000180933.1, exon 1 of 2)	184	ENSDART00000180933.1	ENSDARG00000115013	#N/A	ENSDART00000180933			ENSDARG00000115013.1
CNE14_1_q0.3_peak_73679	chr7	17734143	17734533	+	1030	NA	intron (ENSDART00000080825.5, intron 2 of 7)	-intron (ENSDART00000080825.5, intron 2 of 7)	17725	ENSDART00000080825.5	ENSDARG00000091348	rtn3	ENSDART00000080825			ENSDARG00000091348.4
CNE14_1_q0.3_peak_76030	chr7	70667443	70667780	+	1030	NA	Intergenic	Intergenic	-1646	ENSDART00000097710.6	ENSDARG00000067829	ppargc1a	ENSDART00000097710			ENSDARG00000067829.7
CNE14_1_q0.3_peak_16498	chr14	10981605	10981991	+	1030	NA	promoter-TSS (ENSDART00000091169.7)	-promoter-TSS (ENSDART00000091169.7)	95	ENSDART00000091169.7	ENSDARG00000062795	abcb7	ENSDART00000091169			ENSDARG00000062795.7
CNE14_1_q0.3_peak_59529	chr3	47196881	47197252	+	1029	NA	intron (ENSDART00000165940.2, intron 14 of 19)	-intron (ENSDART00000024031.11, intron 14 of 17)	-1832	ENSDART00000116683.2	ENSDARG00000081869	mir199.2a	ENSDART00000116683			ENSDARG00000081869.2
CNE14_1_q0.3_peak_61252	chr4	5423053	5884826	+	1028	NA	Intergenic	Intergenic	-1909	ENSDART00000010903.8	ENSDARG00000017355	rsph9	ENSDART00000010903			ENSDARG00000017355.8
CNE14_1_q0.3_peak_36286	chr2	19354263	19354687	+	1028	NA	exon (ENSDART00000168627.2, exon 1 of 19)	-exon (ENSDART00000168627.2, exon 1 of 19)	147	ENSDART00000168627.2	ENSDARG00000101903	zfyve9a	ENSDART00000182808			ENSDARG00000101903.2
CNE14_1_q0.3_peak_72400	chr7	6406	6800	+	1027	NA	Intergenic	Intergenic	-1050	ENSDART00000183213.1	ENSDARG00000114910	#N/A	ENSDART00000183213			ENSDARG00000114910.1
CNE14_1_q0.3_peak_17193	chr14	20105772	20108163	+	1027	NA	Intergenic	Intergenic	-49510	ENSDART00000123434.3	ENSDARG00000037433	fmr1	ENSDART00000123434			ENSDARG00000037433.7
CNE14_1_q0.3_peak_19076	chr15	2010606	2011246	+	1027	NA	promoter-TSS (ENSDART00000155688.3)	-promoter-TSS (ENSDART00000155688.3)	0	ENSDART00000155688.3	ENSDARG00000075327	dock10	ENSDART00000155504			ENSDARG00000075327.6
CNE14_1_q0.3_peak_31269	chr18	44128956	44129455	+	1026	NA	promoter-TSS (ENSDART00000087339.6)	-promoter-TSS (ENSDART00000087339.6)	-54	ENSDART00000087339.6	ENSDARG00000061328	cdon	ENSDART00000087339			ENSDARG00000061328.6
CNE14_1_q0.3_peak_67644	chr5	63441057	63441533	+	1025	NA	Intergenic	Intergenic	-2578	ENSDART00000186899.1	ENSDARG00000088492	cntrl	ENSDART00000186899			ENSDARG00000088492.3
CNE14_1_q0.3_peak_75156	chr7	54677153	54677610	+	1025	NA	promoter-TSS (ENSDART00000162795.2)	-promoter-TSS (ENSDART00000162795.2)	-2	ENSDART00000162795.2	ENSDARG00000101637	ccnd1	ENSDART00000170774			ENSDARG00000101637.2
CNE14_1_q0.3_peak_40916	chr20	26822335	26822676	+	1024	NA	promoter-TSS (ENSDART00000046764.9)	-promoter-TSS (ENSDART00000046764.9)	17	ENSDART00000146326.3	ENSDARG00000026629	gmds	ENSDART00000046764			ENSDARG00000026629.10
CNE14_1_q0.3_peak_40001	chr20	6630185	6630913	+	1024	NA	promoter-TSS (ENSDART00000138361.2)	-promoter-TSS (ENSDART00000138361.2)	9	ENSDART00000138361.2	ENSDARG00000031911	si.ch211.191a24.3	ENSDART00000135390			ENSDARG00000031911.7
CNE14_1_q0.3_peak_36453	chr2	24177047	24177503	+	1024	NA	promoter-TSS (ENSDART00000099546.7)	-promoter-TSS (ENSDART00000099546.7)	85	ENSDART00000099546.7	ENSDARG00000068745	map4l	ENSDART00000140575			ENSDARG00000068745.8
CNE14_1_q0.3_peak_36131	chr2	14954072	14955502	+	1023	NA	Intergenic	Intergenic	-14784	ENSDART00000156622.2	ENSDARG00000097463	#N/A	ENSDART00000156622			ENSDARG00000097463.2
CNE14_1_q0.3_peak_51927	chr24	136857	137239	+	1023	NA	intron (ENSDART00000061973.7, intron 1 of 8)	-intron (ENSDART00000061973.7, intron 1 of 8)	17368	ENSDART00000061973.7	ENSDARG00000042259	tgfbr1b	ENSDART00000061973			ENSDARG00000042259.7
CNE14_1_q0.3_peak_82118	chr9	28274754	28275113	+	1023	NA	promoter-TSS (ENSDART00000137582.2)	-promoter-TSS (ENSDART00000137582.2)	-1	ENSDART00000137582.2	ENSDARG00000093420	creb1b	ENSDART00000140178			ENSDARG00000093420.3
CNE14_1_q0.3_peak_74479	chr7	38792005	38792788	+	1023	NA	exon (ENSDART00000157416.3, exon 1 of 5)	-exon (ENSDART00000157416.3, exon 1 of 5)	147	ENSDART00000157416.3	ENSDARG00000104129	si.dkey.23n7.10	ENSDART00000157416			ENSDARG00000104129.3
CNE14_1_q0.3_peak_919	chr1	10473395	10473735	+	1022	NA	promoter-TSS (ENSDART00000040116.8)	-promoter-TSS (ENSDART00000040116.8)	65	ENSDART00000040116.8	ENSDARG00000070512	cnpy3	ENSDART00000040116			ENSDARG00000070512.5
CNE14_1_q0.3_peak_1331	chr1	22835516	22836153	+	1022	NA	Intergenic	Intergenic	-1010	ENSDART00000043556.5	ENSDARG00000034896	ldb2b	ENSDART00000043556			ENSDARG00000034896.6
CNE14_1_q0.3_peak_24488	chr16	43575810	43576380	+	1021	NA	intron (ENSDART00000159249.2, intron 3 of 16)	-intron (ENSDART00000159249.2, intron 3 of 16)	-20516	ENSDART00000178536.2	ENSDARG00000107593	#N/A	ENSDART00000178536			ENSDARG00000107593.2
CNE14_1_q0.3_peak_27955	chr17	43786171	43786610	+	1021	NA	Intergenic	Intergenic	-57146	ENSDART00000164097.2	ENSDARG00000101112	LOC100535468	ENSDART00000164097			ENSDARG00000101112.2
CNE14_1_q0.3_peak_15325	chr13	50375421	50375942	+	1021	NA	promoter-TSS (ENSDART00000099537.4)	-promoter-TSS (ENSDART00000099537.4)	-119	ENSDART00000099537.4	ENSDARG00000068738	cox5b2	ENSDART00000099537			ENSDARG00000068738.5
CNE14_1_q0.3_peak_36460	chr2	24374109	24374641	+	1021	NA	promoter-TSS (ENSDART00000022379.9)	-promoter-TSS (ENSDART00000022379.9)	70	ENSDART00000022379.9	ENSDARG00000003607	nr2f6a	ENSDART00000022379			ENSDARG00000003607.9
CNE14_1_q0.3_peak_961	chr1	12301791	12302228	+	1020	NA	promoter-TSS (ENSDART00000164045.2)	-promoter-TSS (ENSDART00000164045.2)	-64	ENSDART00000164045.2	ENSDARG00000099771	gne	ENSDART00000165733			ENSDARG00000099771.2
CNE14_1_q0.3_peak_17469	chr14	28438781	28439333	+	1020	NA	intron (ENSDART00000006489.8, intron 1 of 14)	-intron (ENSDART00000006489.8, intron 1 of 14)	110	ENSDART00000006489.8	ENSDARG00000004078	acsl4a	ENSDART00000186495			ENSDARG00000004078.8
CNE14_1_q0.3_peak_59580	chr3	49163510	49163971	+	1020	NA	promoter-TSS (ENSDART00000166146.2)	-promoter-TSS (ENSDART00000166146.2)	-57	ENSDART00000166146.2	ENSDARG00000099383	dnajb1a	ENSDART00000166146			ENSDARG00000099383.2
CNE14_1_q0.3_peak_6033	chr10	41939749	41940142	+	1020	NA	promoter-TSS (ENSDART00000126248.3)	-promoter-TSS (ENSDART00000126248.3)	-18	ENSDART00000126248.3	ENSDARG00000042929	tmem120b	ENSDART00000126248			ENSDARG00000042929.8
CNE14_1_q0.3_peak_16497	chr14	10954209	10954552	+	1019	NA	promoter-TSS (ENSDART00000106658.5)	-promoter-TSS (ENSDART00000106658.5)	29	ENSDART00000145776.2	ENSDARG00000071872	zdhhc15b	ENSDART00000133200			ENSDARG00000071872.5
CNE14_1_q0.3_peak_58588	chr3	18567422	18567972	+	1019	NA	intron (ENSDART00000124329.3, intron 1 of 4)	-intron (ENSDART00000124329.3, intron 1 of 4)	137	ENSDART00000124329.3	ENSDARG00000087327	cbx8a	ENSDART00000124329			ENSDARG00000087327.3
CNE14_1_q0.3_peak_24076	chr16	34284967	34285324	+	1019	NA	promoter-TSS (ENSDART00000044235.8)	-promoter-TSS (ENSDART00000044235.8)	-39	ENSDART00000044235.8	ENSDARG00000032221	phactr4b	ENSDART00000044235			ENSDARG00000032221.9
CNE14_1_q0.3_peak_75310	chr7	59515313	59516157	+	1018	NA	promoter-TSS (ENSDART00000163343.2)	-promoter-TSS (ENSDART00000163343.2)	-77	ENSDART00000163745.2	ENSDARG00000098605	slx1b	ENSDART00000163745			ENSDARG00000098605.2
CNE14_1_q0.3_peak_82977	chr9	49426699	49427102	+	1018	NA	Intergenic	Intergenic	38093	ENSDART00000181471.1	ENSDARG00000091090	xirp2b	ENSDART00000186293			ENSDARG00000091090.4
CNE14_1_q0.3_peak_486	chr1	3330384	3330772	+	1018	NA	promoter-TSS (ENSDART00000194988.1)	-promoter-TSS (ENSDART00000194988.1)	-143	ENSDART00000194988.1	ENSDARG00000117575	#N/A	ENSDART00000194827			ENSDARG00000117575.1
CNE14_1_q0.3_peak_65220	chr5	7642605	7643036	+	1018	NA	intron (ENSDART00000168820.2, intron 3 of 13)	-intron (ENSDART00000168820.2, intron 3 of 13)	-10001	ENSDART00000120513.3	ENSDARG00000098630	#N/A	ENSDART00000120513			ENSDARG00000098630.2
CNE14_1_q0.3_peak_25461	chr16	54829146	54830052	+	1017	NA	promoter-TSS (ENSDART00000148392.2)	-promoter-TSS (ENSDART00000148392.2)	25	ENSDART00000148392.2	ENSDARG00000017219	pabpc1a	ENSDART00000149603			ENSDARG00000017219.11
CNE14_1_q0.3_peak_44371	chr21	27419324	27419707	+	1017	NA	intron (ENSDART00000108763.4, intron 7 of 17)	-intron (ENSDART00000077593.6, intron 7 of 17)	3224	ENSDART00000108763.4	ENSDARG00000055278	cfb	ENSDART00000077593			ENSDARG00000055278.7
CNE14_1_q0.3_peak_42543	chr20	53474810	53475240	+	1016	NA	promoter-TSS (ENSDART00000114313.5)	-promoter-TSS (ENSDART00000114313.5)	62	ENSDART00000138976.4	ENSDARG00000078825	bub1ba	ENSDART00000114313			ENSDARG00000078825.8
CNE14_1_q0.3_peak_13880	chr13	23195751	23196168	+	1016	NA	promoter-TSS (ENSDART00000158370.2)	-promoter-TSS (ENSDART00000158370.2)	-6	ENSDART00000158370.2	ENSDARG00000103435	sorbs1	ENSDART00000158370			ENSDARG00000103435.2
CNE14_1_q0.3_peak_36470	chr2	24554386	24554749	+	1016	NA	promoter-TSS (ENSDART00000052061.6)	-promoter-TSS (ENSDART00000052061.6)	-135	ENSDART00000145145.2	ENSDARG00000035858	cnn2	ENSDART00000142687			ENSDARG00000035858.7
CNE14_1_q0.3_peak_39392	chr20	2725138	2726060	+	1015	NA	promoter-TSS (ENSDART00000145730.2)	-promoter-TSS (ENSDART00000145730.2)	-5	ENSDART00000152120.2	ENSDARG00000058729	akirin2	ENSDART00000152120			ENSDARG00000058729.8
CNE14_1_q0.3_peak_76600	chr8	97857	98528	+	1015	NA	Intergenic	Intergenic	-5922	ENSDART00000172101.3	ENSDARG00000100198	sncaip	ENSDART00000172101			ENSDARG00000100198.3
CNE14_1_q0.3_peak_67444	chr5	58626857	58630706	+	1015	NA	Intergenic	Intergenic	-36867	ENSDART00000167481.2	ENSDARG00000103164	zgc.194948	ENSDART00000167481			ENSDARG00000103164.2
CNE14_1_q0.3_peak_56027	chr25	25217884	25299542	+	1014	NA	Intergenic	Intergenic	-51350	ENSDART00000164291.2	ENSDARG00000103976	#N/A	ENSDART00000164291			ENSDARG00000103976.2
CNE14_1_q0.3_peak_33164	chr19	17210515	17210871	+	1014	NA	promoter-TSS (ENSDART00000007906.11)	-promoter-TSS (ENSDART00000007906.11)	42	ENSDART00000132662.3	ENSDARG00000004169	stmn1a	ENSDART00000151228			ENSDARG00000004169.12
CNE14_1_q0.3_peak_22962	chr16	8396321	8396687	+	1014	NA	promoter-TSS (ENSDART00000146807.2)	-promoter-TSS (ENSDART00000146807.2)	-945	ENSDART00000146807.2	ENSDARG00000035308	grb10b	ENSDART00000146807			ENSDARG00000035308.9
CNE14_1_q0.3_peak_74549	chr7	41489827	41490186	+	1014	NA	promoter-TSS (ENSDART00000006724.12)	-promoter-TSS (ENSDART00000006724.12)	-9	ENSDART00000174300.2	ENSDARG00000019969	smarcd3b	ENSDART00000174087			ENSDARG00000019969.12
CNE14_1_q0.3_peak_77950	chr8	18010758	18011307	+	1013	NA	promoter-TSS (ENSDART00000039887.7)	-promoter-TSS (ENSDART00000039887.7)	50	ENSDART00000144532.2	ENSDARG00000030155	ssbp3b	ENSDART00000039887			ENSDARG00000030155.9
CNE14_1_q0.3_peak_34638	chr19	47782847	47783436	+	1013	NA	promoter-TSS (ENSDART00000024777.8)	-promoter-TSS (ENSDART00000024777.8)	4	ENSDART00000024777.8	ENSDARG00000012113	c19h1orf109	ENSDART00000158979			ENSDARG00000012113.8
CNE14_1_q0.3_peak_50989	chr23	34339368	34339749	+	1012	NA	intron (ENSDART00000173272.2, intron 1 of 31)	-intron (ENSDART00000173272.2, intron 1 of 31)	18321	ENSDART00000173272.2	ENSDARG00000105452	plxna1a	ENSDART00000173272			ENSDARG00000105452.2
CNE14_1_q0.3_peak_28471	chr17	49636906	49637438	+	1011	NA	promoter-TSS (ENSDART00000065917.6)	-promoter-TSS (ENSDART00000065917.6)	-85	ENSDART00000075281.4	ENSDARG00000053263	zgc.113372	ENSDART00000065917			ENSDARG00000053263.5
CNE14_1_q0.3_peak_30396	chr18	27077590	27078174	+	1011	NA	promoter-TSS (ENSDART00000098334.4)	-promoter-TSS (ENSDART00000098334.4)	29	ENSDART00000098334.4	ENSDARG00000068128	ppp1r15b	ENSDART00000098334			ENSDARG00000068128.6
CNE14_1_q0.3_peak_53748	chr24	36066946	36067375	+	1011	NA	Intergenic	Intergenic	28366	ENSDART00000158145.2	ENSDARG00000102797	#N/A	ENSDART00000158145			ENSDARG00000102797.2
CNE14_1_q0.3_peak_50867	chr23	30897822	30898448	+	1011	NA	exon (ENSDART00000146859.2, exon 1 of 9)	-exon (ENSDART00000146859.2, exon 1 of 9)	122	ENSDART00000146859.2	ENSDARG00000076964	cables2a	ENSDART00000146859			ENSDARG00000076964.4
CNE14_1_q0.3_peak_56830	chr25	35189360	35189795	+	1011	NA	promoter-TSS (ENSDART00000044453.8)	-promoter-TSS (ENSDART00000044453.8)	22	ENSDART00000044453.8	ENSDARG00000015731	ano5a	ENSDART00000044453			ENSDARG00000015731.10
CNE14_1_q0.3_peak_40223	chr20	11177986	11178451	+	1011	NA	promoter-TSS (ENSDART00000152246.2)	-promoter-TSS (ENSDART00000152246.2)	-196	ENSDART00000152246.2	ENSDARG00000079355	flrt2	ENSDART00000152246			ENSDARG00000079355.4
CNE14_1_q0.3_peak_74332	chr7	34927162	34928072	+	1010	NA	exon (ENSDART00000073397.7, exon 1 of 10)	-exon (ENSDART00000073397.7, exon 1 of 10)	344	ENSDART00000073397.7	ENSDARG00000076297	nfatc3a	ENSDART00000170496			ENSDARG00000076297.5
CNE14_1_q0.3_peak_84584	chrKN150570.1	39580	41998	+	1010	NA	NA	NA	NA	NA
CNE14_1_q0.3_peak_42767	chr21	66965	67411	+	1009	NA	intron (ENSDART00000007672.9, intron 14 of 18)	-intron (ENSDART00000007672.9, intron 14 of 18)	-9551	ENSDART00000174654.2	ENSDARG00000108788	arsb	ENSDART00000174654			ENSDARG00000108788.2
CNE14_1_q0.3_peak_19964	chr15	11131551	11200435	+	1009	NA	Intergenic	Intergenic	-66273	ENSDART00000156308.2	ENSDARG00000097888	#N/A	ENSDART00000156308			ENSDARG00000097888.2
CNE14_1_q0.3_peak_25632	chr17	677306	682036	+	1008	NA	intron (ENSDART00000165583.2, intron 1 of 4)	-intron (ENSDART00000165583.2, intron 1 of 4)	1471	ENSDART00000165583.2	ENSDARG00000102257	soul3	ENSDART00000165583			ENSDARG00000102257.2
CNE14_1_q0.3_peak_38292	chr2	56348482	56348992	+	1008	NA	promoter-TSS (ENSDART00000060745.5)	-promoter-TSS (ENSDART00000060745.5)	-10	ENSDART00000060745.5	ENSDARG00000041435	uba52	ENSDART00000060745			ENSDARG00000041435.5
CNE14_1_q0.3_peak_1442	chr1	26466955	26467348	+	1008	NA	promoter-TSS (ENSDART00000011809.7)	-promoter-TSS (ENSDART00000011809.7)	69	ENSDART00000159318.2	ENSDARG00000019581	uso1	ENSDART00000159345			ENSDARG00000019581.10
CNE14_1_q0.3_peak_11917	chr12	47698539	47698999	+	1008	NA	exon (ENSDART00000112010.4, exon 1 of 5)	-exon (ENSDART00000112010.4, exon 1 of 5)	413	ENSDART00000112010.4	ENSDARG00000077207	lzts2b	ENSDART00000112010			ENSDARG00000077207.4
CNE14_1_q0.3_peak_46071	chr22	2084526	2542135	+	1008	NA	Intergenic	Intergenic	-2666	ENSDART00000132489.2	ENSDARG00000095667	znf1171	ENSDART00000132489			ENSDARG00000095667.2
CNE14_1_q0.3_peak_57611	chr3	3825966	3826424	+	1008	NA	Intergenic	Intergenic	15276	ENSDART00000056035.7	ENSDARG00000038398	LOC100007686	ENSDART00000056035			ENSDARG00000038398.7
CNE14_1_q0.3_peak_22149	chr16	295345	296060	+	1007	NA	Intergenic	Intergenic	-14867	ENSDART00000190541.1	ENSDARG00000115651	#N/A	ENSDART00000190252			ENSDARG00000115651.1
CNE14_1_q0.3_peak_46948	chr22	18349573	18349983	+	1007	NA	promoter-TSS (ENSDART00000186580.1)	-promoter-TSS (ENSDART00000186580.1)	-16	ENSDART00000186580.1	ENSDARG00000006192	gatad2ab	ENSDART00000033103			ENSDARG00000006192.10
CNE14_1_q0.3_peak_46754	chr22	11195449	11195888	+	1006	NA	intron (ENSDART00000102106.5, intron 13 of 13)	-intron (ENSDART00000047442.9, intron 12 of 12)	-7761	ENSDART00000167615.2	ENSDARG00000100563	#N/A	ENSDART00000167615			ENSDARG00000100563.2
CNE14_1_q0.3_peak_41211	chr20	37635571	37636578	+	1006	NA	Intergenic	Intergenic	-6990	ENSDART00000141734.4	ENSDARG00000039987	hivep2a	ENSDART00000177011			ENSDARG00000039987.9
CNE14_1_q0.3_peak_14751	chr13	46718511	46718960	+	1006	NA	exon (ENSDART00000160401.2, exon 1 of 24)	-exon (ENSDART00000160401.2, exon 1 of 24)	217	ENSDART00000160401.2	ENSDARG00000104559	tmem63ba	ENSDART00000160401			ENSDARG00000104559.2
CNE14_1_q0.3_peak_5212	chr10	22728903	22729462	+	1006	NA	intron (ENSDART00000136123.4, intron 1 of 20)	-intron (ENSDART00000136123.4, intron 1 of 20)	5123	ENSDART00000136123.4	ENSDARG00000056929	kdm6bb	ENSDART00000136123			ENSDARG00000056929.7
CNE14_1_q0.3_peak_78584	chr8	34769932	34770309	+	1005	NA	Intergenic	Intergenic	-2708	ENSDART00000164901.2	ENSDARG00000101243	#N/A	ENSDART00000164901			ENSDARG00000101243.2
CNE14_1_q0.3_peak_48641	chr22	38999029	38999568	+	1005	NA	Intergenic	Intergenic	-8235	ENSDART00000185958.1	ENSDARG00000089893	tasora	ENSDART00000185958			ENSDARG00000089893.3
CNE14_1_q0.3_peak_40420	chr20	14843638	14844147	+	1005	NA	intron (ENSDART00000047039.7, intron 16 of 19)	-intron (ENSDART00000047039.7, intron 16 of 19)	29438	ENSDART00000152644.2	ENSDARG00000096568	#N/A	ENSDART00000152644			ENSDARG00000096568.2
CNE14_1_q0.3_peak_12477	chr13	1616197	1616554	+	1004	NA	intron (ENSDART00000165987.3, intron 15 of 58)	-intron (ENSDART00000165987.3, intron 15 of 58)	41099	ENSDART00000165987.3	ENSDARG00000101858	#N/A	ENSDART00000165987			ENSDARG00000101858.3
CNE14_1_q0.3_peak_56155	chr25	27743877	27745149	+	1003	NA	exon (ENSDART00000103519.6, exon 1 of 11)	-exon (ENSDART00000103519.6, exon 1 of 11)	178	ENSDART00000149456.2	ENSDARG00000014113	wasla	ENSDART00000149849			ENSDARG00000014113.11
CNE14_1_q0.3_peak_10877	chr12	25379876	25380218	+	1003	NA	promoter-TSS (ENSDART00000142674.2)	-promoter-TSS (ENSDART00000142674.2)	-19	ENSDART00000142674.2	ENSDARG00000021806	zfp36l2	ENSDART00000142674			ENSDARG00000021806.9
CNE14_1_q0.3_peak_45057	chr21	39457448	39457790	+	1002	NA	Intergenic	Intergenic	-4307	ENSDART00000123970.3	ENSDARG00000073988	mntb	ENSDART00000123970			ENSDARG00000073988.4
CNE14_1_q0.3_peak_43914	chr21	11865831	11866202	+	1002	NA	promoter-TSS (ENSDART00000081676.6)	-promoter-TSS (ENSDART00000081676.6)	44	ENSDART00000081676.6	ENSDARG00000058746	ubap1	ENSDART00000081676			ENSDARG00000058746.9
CNE14_1_q0.3_peak_25555	chr17	114107	114419	+	1001	NA	promoter-TSS (ENSDART00000157784.2)	-promoter-TSS (ENSDART00000157784.2)	-142	ENSDART00000172408.2	ENSDARG00000100019	arhgap11a	ENSDART00000168427			ENSDARG00000100019.2
CNE14_1_q0.3_peak_49905	chr23	10347700	10348251	+	1001	NA	promoter-TSS (ENSDART00000142595.2)	-promoter-TSS (ENSDART00000142595.2)	98	ENSDART00000142595.2	ENSDARG00000018404	krt18a.1	ENSDART00000127667			ENSDARG00000018404.10
CNE14_1_q0.3_peak_65511	chr5	13472053	13472696	+	1001	NA	exon (ENSDART00000114069.4, exon 1 of 7)	-exon (ENSDART00000114069.4, exon 1 of 7)	129	ENSDART00000132406.2	ENSDARG00000074309	LOC100150651	ENSDART00000114069			ENSDARG00000074309.5
CNE14_1_q0.3_peak_40840	chr20	25436226	25436536	+	1001	NA	promoter-TSS (ENSDART00000153266.2)	-promoter-TSS (ENSDART00000153266.2)	8	ENSDART00000153266.2	ENSDARG00000000161	itsn2a	ENSDART00000180278			ENSDARG00000000161.13
CNE14_1_q0.3_peak_41134	chr20	34521558	34521963	+	1001	NA	TTS (ENSDART00000061588.6)	-TTS (ENSDART00000061588.6)	9630	ENSDART00000131637.2	ENSDARG00000042027	prrx1b	ENSDART00000061588			ENSDARG00000042027.7
CNE14_1_q0.3_peak_51463	chr23	41767193	41767645	+	1001	NA	Intergenic	Intergenic	-4463	ENSDART00000128302.3	ENSDARG00000086856	stk35	ENSDART00000186564			ENSDARG00000086856.3
CNE14_1_q0.3_peak_51257	chr23	38941243	38941562	+	1001	NA	exon (ENSDART00000065331.6, exon 1 of 4)	-exon (ENSDART00000065331.6, exon 1 of 4)	702	ENSDART00000065331.6	ENSDARG00000044485	sall4	ENSDART00000065331			ENSDARG00000044485.6
CNE14_1_q0.3_peak_10110	chr12	4920237	4920630	+	1001	NA	promoter-TSS (ENSDART00000159986.2)	-promoter-TSS (ENSDART00000159986.2)	-18	ENSDART00000171525.2	ENSDARG00000099954	plekhm1	ENSDART00000159986			ENSDARG00000099954.3
CNE14_1_q0.3_peak_45736	chr21	45518976	45519410	+	1000	NA	promoter-TSS (ENSDART00000183665.1)	-promoter-TSS (ENSDART00000183665.1)	-180	ENSDART00000183665.1	ENSDARG00000102171	fnip1	ENSDART00000167914			ENSDARG00000102171.2
CNE14_1_q0.3_peak_70297	chr6	27090665	27091175	+	1000	NA	intron (ENSDART00000121558.4, intron 1 of 12)	-intron (ENSDART00000121558.4, intron 1 of 12)	120	ENSDART00000121558.4	ENSDARG00000052104	atg4b	ENSDART00000121558			ENSDARG00000052104.8
CNE14_1_q0.3_peak_37548	chr2	49457346	49457833	+	1000	NA	promoter-TSS (ENSDART00000129967.3)	-promoter-TSS (ENSDART00000129967.3)	-37	ENSDART00000129967.3	ENSDARG00000067958	sh3gl1a	ENSDART00000129967			ENSDARG00000067958.6
CNE14_1_q0.3_peak_75007	chr7	53018492	53019712	+	1000	NA	Intergenic	Intergenic	10690	ENSDART00000174022.2	ENSDARG00000104600	#N/A	ENSDART00000174224			ENSDARG00000104600.3
CNE14_1_q0.3_peak_2627	chr1	50610830	50611184	+	999	NA	promoter-TSS (ENSDART00000145550.4)	-promoter-TSS (ENSDART00000145550.4)	24	ENSDART00000150677.2	ENSDARG00000010655	ppm1k	ENSDART00000148285			ENSDARG00000010655.12
CNE14_1_q0.3_peak_34612	chr19	47639667	47640164	+	998	NA	Intergenic	Intergenic	-52196	ENSDART00000111108.4	ENSDARG00000075321	#N/A	ENSDART00000111108			ENSDARG00000075321.4
CNE14_1_q0.3_peak_60391	chr3	58167195	58167578	+	997	NA	promoter-TSS (ENSDART00000010395.9)	-promoter-TSS (ENSDART00000010395.9)	83	ENSDART00000010395.9	ENSDARG00000014794	uqcrc2a	ENSDART00000155874			ENSDARG00000014794.10
CNE14_1_q0.3_peak_45993	chr22	1284897	1285357	+	996	NA	promoter-TSS (ENSDART00000171750.2)	-promoter-TSS (ENSDART00000171750.2)	-55	ENSDART00000171750.2	ENSDARG00000095745	si.ch73.138e16.3	ENSDART00000171750			ENSDARG00000095745.3
CNE14_1_q0.3_peak_17596	chr14	31529385	31530064	+	996	NA	promoter-TSS (ENSDART00000053026.5)	-promoter-TSS (ENSDART00000053026.5)	-234	ENSDART00000053026.5	ENSDARG00000036500	fam122b	ENSDART00000128658			ENSDARG00000036500.6
CNE14_1_q0.3_peak_51911	chr23	46219408	46220054	+	996	NA	Intergenic	Intergenic	-2597	ENSDART00000189477.1	ENSDARG00000098990	zgc.162858	ENSDART00000189477			ENSDARG00000098990.2
CNE14_1_q0.3_peak_3567	chr10	883246	883562	+	996	NA	Intergenic	Intergenic	78160	ENSDART00000191765.1	ENSDARG00000112729	#N/A	ENSDART00000191765			ENSDARG00000112729.1
CNE14_1_q0.3_peak_23290	chr16	14248617	14249035	+	995	NA	promoter-TSS (ENSDART00000059967.8)	-promoter-TSS (ENSDART00000059967.8)	66	ENSDART00000090329.6	ENSDARG00000062450	rnf115	ENSDART00000090329			ENSDARG00000062450.6
CNE14_1_q0.3_peak_71133	chr6	49583121	49583824	+	995	NA	intron (ENSDART00000103357.5, intron 1 of 5)	-intron (ENSDART00000103357.5, intron 1 of 5)	319	ENSDART00000103357.5	ENSDARG00000070435	vapb	ENSDART00000103357			ENSDARG00000070435.5
CNE14_1_q0.3_peak_63967	chr4	75121356	75121778	+	994	NA	Intergenic	Intergenic	33088	ENSDART00000174088.2	ENSDARG00000100624	si.cabz01066312.1	ENSDART00000174127			ENSDARG00000100624.3
CNE14_1_q0.3_peak_68524	chr5	72324270	72324736	+	994	NA	promoter-TSS (ENSDART00000006380.9)	-promoter-TSS (ENSDART00000006380.9)	-132	ENSDART00000006380.9	ENSDARG00000002216	tbx3a	ENSDART00000006380			ENSDARG00000002216.11
CNE14_1_q0.3_peak_63764	chr4	72959245	72959852	+	994	NA	Intergenic	Intergenic	89733	ENSDART00000169165.2	ENSDARG00000098811	#N/A	ENSDART00000169165			ENSDARG00000098811.2
CNE14_1_q0.3_peak_23082	chr16	9979812	9980558	+	993	NA	exon (ENSDART00000066372.6, exon 1 of 3)	-exon (ENSDART00000066372.6, exon 1 of 3)	217	ENSDART00000066372.6	ENSDARG00000045131	id4	ENSDART00000066372			ENSDARG00000045131.6
CNE14_1_q0.3_peak_14352	chr13	38395511	38395854	+	993	NA	Intergenic	Intergenic	-34784	ENSDART00000132691.3	ENSDARG00000059832	adgrb3	ENSDART00000145292			ENSDARG00000059832.8
CNE14_1_q0.3_peak_22625	chr16	4091402	4091946	+	993	NA	intron (ENSDART00000166241.2, intron 6 of 22)	-intron (ENSDART00000166241.2, intron 6 of 22)	3883	ENSDART00000170038.2	ENSDARG00000103683	inpp5b	ENSDART00000170038			ENSDARG00000103683.2
CNE14_1_q0.3_peak_12008	chr12	48198600	48199180	+	992	NA	exon (ENSDART00000171058.2, exon 1 of 18)	-exon (ENSDART00000171058.2, exon 1 of 18)	337	ENSDART00000171058.2	ENSDARG00000098946	pald1a	ENSDART00000171058			ENSDARG00000098946.2
CNE14_1_q0.3_peak_9357	chr11	44369046	44369536	+	991	NA	intron (ENSDART00000193470.1, intron 7 of 7)	-intron (ENSDART00000191417.1, intron 8 of 9)	12584	ENSDART00000165219.2	ENSDARG00000101057	srsf7b	ENSDART00000160678			ENSDARG00000101057.2
CNE14_1_q0.3_peak_54835	chr25	2198636	2199044	+	991	NA	promoter-TSS (ENSDART00000152064.2)	-promoter-TSS (ENSDART00000152064.2)	59	ENSDART00000152064.2	ENSDARG00000054323	pparab	ENSDART00000152064			ENSDARG00000054323.8
CNE14_1_q0.3_peak_80895	chr9	4810269	4810668	+	991	NA	intron (ENSDART00000016814.10, intron 3 of 25)	-intron (ENSDART00000016814.10, intron 3 of 25)	46299	ENSDART00000016814.10	ENSDARG00000012586	fmnl2a	ENSDART00000133090			ENSDARG00000012586.13
CNE14_1_q0.3_peak_68407	chr5	71689272	71689605	+	991	NA	intron (ENSDART00000174396.2, intron 4 of 11)	-intron (ENSDART00000174396.2, intron 4 of 11)	15753	ENSDART00000187767.1	ENSDARG00000001950	ak1	ENSDART00000187767			ENSDARG00000001950.8
CNE14_1_q0.3_peak_12021	chr12	48271309	48271973	+	991	NA	Intergenic	Intergenic	29800	ENSDART00000168616.3	ENSDARG00000099933	ppa1a	ENSDART00000168616			ENSDARG00000099933.3
CNE14_1_q0.3_peak_69683	chr6	15563006	15563405	+	989	NA	intron (ENSDART00000143502.3, intron 2 of 15)	-intron (ENSDART00000141597.4, intron 3 of 16)	19150	ENSDART00000176076.2	ENSDARG00000109159	#N/A	ENSDART00000176076			ENSDARG00000109159.2
CNE14_1_q0.3_peak_3446	chr10	405761	406405	+	989	NA	promoter-TSS (ENSDART00000145124.3)	-promoter-TSS (ENSDART00000145124.3)	-63	ENSDART00000145124.3	ENSDARG00000087910	dact3a	ENSDART00000145124			ENSDARG00000087910.4
CNE14_1_q0.3_peak_44528	chr21	30501791	30502136	+	989	NA	promoter-TSS (ENSDART00000043727.8)	-promoter-TSS (ENSDART00000043727.8)	-39	ENSDART00000043727.8	ENSDARG00000020645	slc7a3a	ENSDART00000043727			ENSDARG00000020645.10
CNE14_1_q0.3_peak_61835	chr4	25796529	25796962	+	989	NA	exon (ENSDART00000122881.4, exon 1 of 4)	-exon (ENSDART00000122881.4, exon 1 of 4)	103	ENSDART00000122881.4	ENSDARG00000045525	tmcc3	ENSDART00000146658			ENSDARG00000045525.7
CNE14_1_q0.3_peak_60512	chr3	58798496	58798912	+	988	NA	promoter-TSS (ENSDART00000161248.2)	-promoter-TSS (ENSDART00000161248.2)	111	ENSDART00000082920.6	ENSDARG00000059567	si.ch73.281f12.4	ENSDART00000082920			ENSDARG00000059567.7
CNE14_1_q0.3_peak_31080	chr18	39326837	39327238	+	988	NA	promoter-TSS (ENSDART00000012164.10)	-promoter-TSS (ENSDART00000012164.10)	27	ENSDART00000012164.10	ENSDARG00000002571	tmod2	ENSDART00000012164			ENSDARG00000002571.11
CNE14_1_q0.3_peak_17935	chr14	41468803	41469258	+	988	NA	promoter-TSS (ENSDART00000003170.5)	-promoter-TSS (ENSDART00000003170.5)	6	ENSDART00000003170.5	ENSDARG00000018145	mid1ip1l	ENSDART00000003170			ENSDARG00000018145.5
CNE14_1_q0.3_peak_79292	chr8	48942432	48943215	+	988	NA	promoter-TSS (ENSDART00000180763.1)	-promoter-TSS (ENSDART00000180763.1)	-186	ENSDART00000180763.1	ENSDARG00000012747	rer1	ENSDART00000132035			ENSDARG00000012747.11
CNE14_1_q0.3_peak_80584	chr9	2452077	2452428	+	987	NA	promoter-TSS (ENSDART00000193993.1)	-promoter-TSS (ENSDART00000193993.1)	-420	ENSDART00000193993.1	ENSDARG00000101735	chn1	ENSDART00000172624			ENSDARG00000101735.3
CNE14_1_q0.3_peak_24067	chr16	34046562	34046915	+	987	NA	promoter-TSS (ENSDART00000058424.5)	-promoter-TSS (ENSDART00000058424.5)	5	ENSDART00000058424.5	ENSDARG00000039943	tent5ba	ENSDART00000058424			ENSDARG00000039943.5
CNE14_1_q0.3_peak_28655	chr17	50655727	50656893	+	986	NA	exon (ENSDART00000127374.4, exon 1 of 14)	-exon (ENSDART00000127374.4, exon 1 of 14)	133	ENSDART00000127374.4	ENSDARG00000086808	ddhd1a	ENSDART00000184917			ENSDARG00000086808.4
CNE14_1_q0.3_peak_64278	chr5	1046836	1047835	+	986	NA	promoter-TSS (ENSDART00000181112.1)	-promoter-TSS (ENSDART00000181112.1)	-113	ENSDART00000181112.1	ENSDARG00000075952	mbd2	ENSDART00000181112			ENSDARG00000075952.4
CNE14_1_q0.3_peak_69669	chr6	15065157	15065502	+	986	NA	promoter-TSS (ENSDART00000087797.5)	-promoter-TSS (ENSDART00000087797.5)	47	ENSDART00000087797.5	ENSDARG00000061508	tgfbrap1	ENSDART00000087797			ENSDARG00000061508.5
CNE14_1_q0.3_peak_66634	chr5	41124056	41124513	+	986	NA	promoter-TSS (ENSDART00000083561.6)	-promoter-TSS (ENSDART00000083561.6)	-43	ENSDART00000083561.6	ENSDARG00000059817	mtmr12	ENSDART00000083561			ENSDARG00000059817.8
CNE14_1_q0.3_peak_71174	chr6	50392930	50393283	+	986	NA	promoter-TSS (ENSDART00000055502.6)	-promoter-TSS (ENSDART00000055502.6)	13	ENSDART00000055511.4	ENSDARG00000038074	ergic3	ENSDART00000055511			ENSDARG00000038074.6
CNE14_1_q0.3_peak_57258	chr3	137563	137925	+	986	NA	Intergenic	Intergenic	-1701	ENSDART00000160266.2	ENSDARG00000104985	wu.fd06e11	ENSDART00000171887			ENSDARG00000104985.2
CNE14_1_q0.3_peak_31570	chr18	46853315	46853806	+	985	NA	exon (ENSDART00000190084.1, exon 9 of 19)	-exon (ENSDART00000190084.1, exon 9 of 19)	27548	ENSDART00000190084.1	ENSDARG00000074258	gramd1bb	ENSDART00000182754			ENSDARG00000074258.4
CNE14_1_q0.3_peak_29339	chr18	2188931	2189404	+	985	NA	promoter-TSS (ENSDART00000170827.2)	-promoter-TSS (ENSDART00000170827.2)	-44	ENSDART00000170827.2	ENSDARG00000104126	ccpg1	ENSDART00000170827			ENSDARG00000104126.2
CNE14_1_q0.3_peak_25685	chr17	1152934	1153317	+	984	NA	intron (ENSDART00000161202.2, intron 2 of 10)	-intron (ENSDART00000161202.2, intron 2 of 10)	21835	ENSDART00000161202.2	ENSDARG00000104959	dnajc17	ENSDART00000161202			ENSDARG00000104959.3
CNE14_1_q0.3_peak_70929	chr6	46162072	46162703	+	984	NA	exon (ENSDART00000017309.11, exon 1 of 29)	-exon (ENSDART00000017309.11, exon 1 of 29)	198	ENSDART00000153489.2	ENSDARG00000060123	ca16b	ENSDART00000154392			ENSDARG00000060123.8
CNE14_1_q0.3_peak_79547	chr8	50725820	50726243	+	984	NA	Intergenic	Intergenic	-1189	ENSDART00000127062.3	ENSDARG00000089156	egr3	ENSDART00000127062			ENSDARG00000089156.3
CNE14_1_q0.3_peak_24761	chr16	48981093	48981791	+	984	NA	Intergenic	Intergenic	-23879	ENSDART00000160919.2	ENSDARG00000103034	LOC100536500	ENSDART00000160919			ENSDARG00000103034.2
CNE14_1_q0.3_peak_15676	chr14	597576	598188	+	983	NA	exon (ENSDART00000159805.2, exon 1 of 8)	-exon (ENSDART00000159805.2, exon 1 of 8)	350	ENSDART00000159805.2	ENSDARG00000103290	LOC101883245	ENSDART00000159805			ENSDARG00000103290.2
CNE14_1_q0.3_peak_13407	chr13	12671337	12671736	+	983	NA	promoter-TSS (ENSDART00000010517.8)	-promoter-TSS (ENSDART00000010517.8)	23	ENSDART00000010517.8	ENSDARG00000013274	eif4eb	ENSDART00000010517			ENSDARG00000013274.8
CNE14_1_q0.3_peak_58795	chr3	25086764	25087112	+	983	NA	promoter-TSS (ENSDART00000050245.6)	-promoter-TSS (ENSDART00000050245.6)	13	ENSDART00000135047.2	ENSDARG00000007916	xpnpep3	ENSDART00000135047			ENSDARG00000007916.8
CNE14_1_q0.3_peak_19878	chr15	8917872	8918305	+	983	NA	Intergenic	Intergenic	-61303	ENSDART00000192816.1	ENSDARG00000012177	rab4b	ENSDART00000008273			ENSDARG00000012177.9
CNE14_1_q0.3_peak_49814	chr23	8607687	8608138	+	983	NA	Intergenic	Intergenic	-71304	ENSDART00000111368.3	ENSDARG00000077385	rgs19	ENSDART00000111368			ENSDARG00000077385.5
CNE14_1_q0.3_peak_46870	chr22	15868104	15868497	+	982	NA	Intergenic	Intergenic	-29921	ENSDART00000062587.6	ENSDARG00000042667	klf2a	ENSDART00000062587			ENSDARG00000042667.6
CNE14_1_q0.3_peak_55950	chr25	22988216	22988569	+	982	NA	intron (ENSDART00000024633.9, intron 3 of 6)	-intron (ENSDART00000024633.9, intron 3 of 6)	45227	ENSDART00000120570.2	ENSDARG00000085170	#N/A	ENSDART00000120570			ENSDARG00000085170.2
CNE14_1_q0.3_peak_12893	chr13	4538556	4538868	+	982	NA	intron (ENSDART00000007500.6, intron 1 of 22)	-intron (ENSDART00000007500.6, intron 1 of 22)	33480	ENSDART00000161684.2	ENSDARG00000003449	pde10a	ENSDART00000144312			ENSDARG00000003449.10
CNE14_1_q0.3_peak_84185	chrKN150015.1	1367	2023	+	982	NA	NA	NA	NA	NA
CNE14_1_q0.3_peak_66755	chr5	44496844	44497262	+	982	NA	promoter-TSS (ENSDART00000110076.4)	-promoter-TSS (ENSDART00000110076.4)	-248	ENSDART00000110076.4	ENSDARG00000077298	gas1a	ENSDART00000110076			ENSDARG00000077298.5
CNE14_1_q0.3_peak_49870	chr23	9508458	9508847	+	981	NA	intron (ENSDART00000010697.8, intron 1 of 13)	-intron (ENSDART00000010697.8, intron 1 of 13)	114	ENSDART00000010697.8	ENSDARG00000013830	osbpl2b	ENSDART00000010697			ENSDARG00000013830.11
CNE14_1_q0.3_peak_77728	chr8	11445781	11446132	+	981	NA	intron (ENSDART00000018739.10, intron 1 of 7)	-intron (ENSDART00000018739.10, intron 1 of 7)	20908	ENSDART00000018739.10	ENSDARG00000023443	tjp2b	ENSDART00000018739			ENSDARG00000023443.10
CNE14_1_q0.3_peak_40791	chr20	24002460	24002834	+	981	NA	intron (ENSDART00000131857.3, intron 3 of 5)	-intron (ENSDART00000131857.3, intron 3 of 5)	19911	ENSDART00000183346.1	ENSDARG00000004074	bach2b	ENSDART00000131857			ENSDARG00000004074.8
CNE14_1_q0.3_peak_17762	chr14	36862621	36863565	+	980	NA	promoter-TSS (ENSDART00000109293.4)	-promoter-TSS (ENSDART00000109293.4)	339	ENSDART00000158052.3	ENSDARG00000089767	rnf130	ENSDART00000168615			ENSDARG00000089767.4
CNE14_1_q0.3_peak_5221	chr10	22918014	22918393	+	980	NA	promoter-TSS (ENSDART00000163908.2)	-promoter-TSS (ENSDART00000163908.2)	11	ENSDART00000163908.2	ENSDARG00000104458	rnasekb	ENSDART00000163908			ENSDARG00000104458.2
CNE14_1_q0.3_peak_45472	chr21	43701887	43702259	+	980	NA	promoter-TSS (ENSDART00000017176.10)	-promoter-TSS (ENSDART00000017176.10)	57	ENSDART00000017176.10	ENSDARG00000016484	dkc1	ENSDART00000017176			ENSDARG00000016484.11
CNE14_1_q0.3_peak_21481	chr15	43432146	43432623	+	980	NA	intron (ENSDART00000182528.1, intron 1 of 20)	-intron (ENSDART00000172154.2, intron 1 of 20)	33912	ENSDART00000187688.1	ENSDARG00000099786	actn4	ENSDART00000187688			ENSDARG00000099786.2
CNE14_1_q0.3_peak_40781	chr20	23668037	23668443	+	979	NA	TTS (ENSDART00000192145.1)	-TTS (ENSDART00000192145.1)	-2254	ENSDART00000155262.3	ENSDARG00000022350	nek1	ENSDART00000035239			ENSDARG00000022350.12
CNE14_1_q0.3_peak_84482	chrKN150411.1	1862	2702	+	979	NA	NA	NA	NA	NA
CNE14_1_q0.3_peak_48584	chr22	38607103	38607627	+	979	NA	exon (ENSDART00000164609.2, exon 1 of 24)	-exon (ENSDART00000164609.2, exon 1 of 24)	139	ENSDART00000164609.2	ENSDARG00000098644	si.ch211.126j24.1	ENSDART00000164609			ENSDARG00000098644.2
CNE14_1_q0.3_peak_39884	chr20	6196492	6197450	+	979	NA	promoter-TSS (ENSDART00000013343.8)	-promoter-TSS (ENSDART00000013343.8)	18	ENSDART00000013343.8	ENSDARG00000010301	b4galt6	ENSDART00000139168			ENSDARG00000010301.9
CNE14_1_q0.3_peak_8805	chr11	37879953	37881059	+	979	NA	promoter-TSS (ENSDART00000102868.4)	-promoter-TSS (ENSDART00000102868.4)	-14	ENSDART00000102868.4	ENSDARG00000070213	etnk2	ENSDART00000102868			ENSDARG00000070213.4
CNE14_1_q0.3_peak_20215	chr15	17138261	17138913	+	978	NA	promoter-TSS (ENSDART00000080777.4)	-promoter-TSS (ENSDART00000080777.4)	53	ENSDART00000080777.4	ENSDARG00000057805	mrpl28	ENSDART00000080777			ENSDARG00000057805.5
CNE14_1_q0.3_peak_53163	chr24	21345900	21346228	+	978	NA	promoter-TSS (ENSDART00000126519.3)	-promoter-TSS (ENSDART00000126519.3)	-732	ENSDART00000126519.3	ENSDARG00000088232	shisa2	ENSDART00000126519			ENSDARG00000088232.3
CNE14_1_q0.3_peak_15505	chr13	51741566	51741952	+	978	NA	Intergenic	Intergenic	31034	ENSDART00000163741.3	ENSDARG00000101080	pwwp2b	ENSDART00000163741			ENSDARG00000101080.3
CNE14_1_q0.3_peak_38806	chr2	59150020	59351244	+	977	NA	Intergenic	Intergenic	-2821	ENSDART00000141384.2	ENSDARG00000093203	LOC108180198	ENSDART00000141384			ENSDARG00000093203.3
CNE14_1_q0.3_peak_21464	chr15	43283521	43284196	+	977	NA	intron (ENSDART00000041677.8, intron 1 of 8)	-intron (ENSDART00000041677.8, intron 1 of 8)	163	ENSDART00000041677.8	ENSDARG00000029353	serpine2	ENSDART00000166805			ENSDARG00000029353.9
CNE14_1_q0.3_peak_53020	chr24	19518327	19518791	+	977	NA	promoter-TSS (ENSDART00000056081.4)	-promoter-TSS (ENSDART00000056081.4)	-11	ENSDART00000056081.4	ENSDARG00000038428	sulf1	ENSDART00000140379			ENSDARG00000038428.8
CNE14_1_q0.3_peak_48605	chr22	38801263	38801651	+	976	NA	promoter-TSS (ENSDART00000140764.3)	-promoter-TSS (ENSDART00000140764.3)	53	ENSDART00000140764.3	ENSDARG00000070898	si.ch211.262h13.3	ENSDART00000140764			ENSDARG00000070898.6
CNE14_1_q0.3_peak_55795	chr25	18330290	18330854	+	976	NA	promoter-TSS (ENSDART00000104496.4)	-promoter-TSS (ENSDART00000104496.4)	-69	ENSDART00000104496.4	ENSDARG00000070914	dusp6	ENSDART00000104496			ENSDARG00000070914.4
CNE14_1_q0.3_peak_24742	chr16	48460667	48461627	+	976	NA	exon (ENSDART00000159902.2, exon 1 of 11)	-exon (ENSDART00000159902.2, exon 1 of 11)	274	ENSDART00000159902.2	ENSDARG00000103155	ext1a	ENSDART00000159902			ENSDARG00000103155.2
CNE14_1_q0.3_peak_31298	chr18	44625924	44626404	+	975	NA	Intergenic	Intergenic	-2489	ENSDART00000005431.9	ENSDARG00000020454	psmd8	ENSDART00000005431			ENSDARG00000020454.10
CNE14_1_q0.3_peak_20680	chr15	28569103	28569537	+	975	NA	exon (ENSDART00000127845.3, exon 1 of 14)	-exon (ENSDART00000127845.3, exon 1 of 14)	466	ENSDART00000127845.3	ENSDARG00000088440	ssh2a	ENSDART00000186196			ENSDARG00000088440.4
CNE14_1_q0.3_peak_65309	chr5	9338364	9338695	+	975	NA	Intergenic	Intergenic	-9755	ENSDART00000149417.3	ENSDARG00000042041	tal2	ENSDART00000149417			ENSDARG00000042041.7
CNE14_1_q0.3_peak_66338	chr5	33865154	33865797	+	974	NA	promoter-TSS (ENSDART00000132634.2)	-promoter-TSS (ENSDART00000132634.2)	-275	ENSDART00000132634.2	ENSDARG00000095064	#N/A	ENSDART00000139371			ENSDARG00000095064.3
CNE14_1_q0.3_peak_60935	chr3	62379473	62380466	+	974	NA	exon (ENSDART00000155853.2, exon 1 of 4)	-exon (ENSDART00000155853.2, exon 1 of 4)	177	ENSDART00000155853.2	ENSDARG00000077080	gprc5ba	ENSDART00000155853			ENSDARG00000077080.5
CNE14_1_q0.3_peak_84475	chrKN150385.1	23908	36909	+	974	NA	NA	NA	NA	NA
CNE14_1_q0.3_peak_71531	chr6	54638292	54638656	+	974	NA	intron (ENSDART00000093199.6, intron 3 of 12)	-intron (ENSDART00000093199.6, intron 3 of 12)	-42256	ENSDART00000074602.4	ENSDARG00000052701	smpd2b	ENSDART00000074602			ENSDARG00000052701.4
CNE14_1_q0.3_peak_15048	chr13	48431319	48431925	+	974	NA	exon (ENSDART00000159688.2, exon 1 of 21)	-exon (ENSDART00000159688.2, exon 1 of 21)	144	ENSDART00000159688.2	ENSDARG00000102294	fbxo11a	ENSDART00000169473			ENSDARG00000102294.2
CNE14_1_q0.3_peak_71016	chr6	46406566	46406930	+	974	NA	intron (ENSDART00000138567.3, intron 1 of 29)	-intron (ENSDART00000131203.3, intron 1 of 28)	181	ENSDART00000138567.3	ENSDARG00000077038	pbrm1l	ENSDART00000138567			ENSDARG00000077038.6
CNE14_1_q0.3_peak_79791	chr8	51954309	51954671	+	973	NA	promoter-TSS (ENSDART00000132527.2)	-promoter-TSS (ENSDART00000132527.2)	72	ENSDART00000132527.2	ENSDARG00000039229	cep78	ENSDART00000057315			ENSDARG00000039229.6
CNE14_1_q0.3_peak_81973	chr9	25444066	25444490	+	972	NA	promoter-TSS (ENSDART00000002428.10)	-promoter-TSS (ENSDART00000002428.10)	-187	ENSDART00000002428.10	ENSDARG00000011188	acvr2aa	ENSDART00000129522			ENSDARG00000011188.11
CNE14_1_q0.3_peak_55971	chr25	23358812	23359265	+	972	NA	exon (ENSDART00000156965.2, exon 1 of 22)	-exon (ENSDART00000156965.2, exon 1 of 22)	114	ENSDART00000156965.2	ENSDARG00000076002	osbpl5	ENSDART00000156965			ENSDARG00000076002.5
CNE14_1_q0.3_peak_56229	chr25	29688411	29689327	+	972	NA	exon (ENSDART00000073478.6, exon 1 of 12)	-exon (ENSDART00000073478.6, exon 1 of 12)	198	ENSDART00000073478.6	ENSDARG00000051798	brd1b	ENSDART00000073478			ENSDARG00000051798.7
CNE14_1_q0.3_peak_65952	chr5	22602772	22603315	+	972	NA	promoter-TSS (ENSDART00000011699.7)	-promoter-TSS (ENSDART00000011699.7)	-64	ENSDART00000146287.3	ENSDARG00000020482	nono	ENSDART00000176442			ENSDARG00000020482.10
CNE14_1_q0.3_peak_60687	chr3	60101182	60117217	+	971	NA	intron (ENSDART00000166982.2, intron 7 of 11)	-intron (ENSDART00000166982.2, intron 7 of 11)	33331	ENSDART00000153247.2	ENSDARG00000090930	si.ch211.120g10.1	ENSDART00000153247			ENSDARG00000090930.4
CNE14_1_q0.3_peak_70474	chr6	33245681	33246068	+	971	NA	Intergenic	Intergenic	-116562	ENSDART00000156987.3	ENSDARG00000052027	tspan1	ENSDART00000073757			ENSDARG00000052027.7
CNE14_1_q0.3_peak_9894	chr12	2800377	2801081	+	971	NA	promoter-TSS (ENSDART00000152682.2)	-promoter-TSS (ENSDART00000152682.2)	80	ENSDART00000152682.2	ENSDARG00000079623	ubtd1b	ENSDART00000083784			ENSDARG00000079623.6
CNE14_1_q0.3_peak_2920	chr1	55095252	55095712	+	971	NA	intron (ENSDART00000132727.3, intron 1 of 9)	-intron (ENSDART00000132727.3, intron 1 of 9)	168	ENSDART00000132727.3	ENSDARG00000069249	aftpha	ENSDART00000150492			ENSDARG00000069249.8
CNE14_1_q0.3_peak_25822	chr17	2162806	2163553	+	971	NA	exon (ENSDART00000103775.5, exon 1 of 11)	-exon (ENSDART00000103775.5, exon 1 of 11)	263	ENSDART00000103775.5	ENSDARG00000027564	LOC100536197	ENSDART00000103775			ENSDARG00000027564.8
CNE14_1_q0.3_peak_40055	chr20	7176538	7177020	+	971	NA	promoter-TSS (ENSDART00000012247.10)	-promoter-TSS (ENSDART00000012247.10)	30	ENSDART00000012247.10	ENSDARG00000013236	dhcr24	ENSDART00000125019			ENSDARG00000013236.12
CNE14_1_q0.3_peak_74866	chr7	49650991	49651378	+	970	NA	promoter-TSS (ENSDART00000148113.2)	-promoter-TSS (ENSDART00000148113.2)	13	ENSDART00000148113.2	ENSDARG00000005651	hrasb	ENSDART00000015040			ENSDARG00000005651.11
CNE14_1_q0.3_peak_77689	chr8	10949663	10950125	+	970	NA	promoter-TSS (ENSDART00000123209.4)	-promoter-TSS (ENSDART00000123209.4)	-47	ENSDART00000123209.4	ENSDARG00000043624	slc66a1	ENSDART00000123209			ENSDARG00000043624.7
CNE14_1_q0.3_peak_17598	chr14	31567136	31567490	+	970	NA	intron (ENSDART00000002684.8, intron 2 of 17)	-intron (ENSDART00000002684.8, intron 2 of 17)	796	ENSDART00000002684.8	ENSDARG00000017931	ints6l	ENSDART00000002684			ENSDARG00000017931.10
CNE14_1_q0.3_peak_58307	chr3	12226690	12227221	+	970	NA	exon (ENSDART00000167356.3, exon 1 of 7)	-exon (ENSDART00000167356.3, exon 1 of 7)	404	ENSDART00000167356.3	ENSDARG00000103923	tfap4	ENSDART00000167356			ENSDARG00000103923.3
CNE14_1_q0.3_peak_25743	chr17	1750456	1751049	+	970	NA	Intergenic	Intergenic	-45739	ENSDART00000182864.1	ENSDARG00000110371	#N/A	ENSDART00000182864			ENSDARG00000110371.1
CNE14_1_q0.3_peak_16159	chr14	4628644	4629125	+	970	NA	intron (ENSDART00000014454.8, intron 7 of 8)	-intron (ENSDART00000014454.8, intron 7 of 8)	53230	ENSDART00000014454.8	ENSDARG00000013389	gabra4	ENSDART00000014454			ENSDARG00000013389.8
CNE14_1_q0.3_peak_12040	chr12	48390293	48391210	+	969	NA	promoter-TSS (ENSDART00000149351.2)	-promoter-TSS (ENSDART00000149351.2)	36	ENSDART00000149351.2	ENSDARG00000033662	scd	ENSDART00000180362			ENSDARG00000033662.8
CNE14_1_q0.3_peak_49775	chr23	7710601	7710952	+	969	NA	promoter-TSS (ENSDART00000161193.2)	-promoter-TSS (ENSDART00000161193.2)	44	ENSDART00000161193.2	ENSDARG00000101120	kif3b	ENSDART00000168199			ENSDARG00000101120.3
CNE14_1_q0.3_peak_27710	chr17	39910821	39916138	+	969	NA	Intergenic	Intergenic	-26851	ENSDART00000002217.6	ENSDARG00000013134	prph2la	ENSDART00000184030			ENSDARG00000013134.6
CNE14_1_q0.3_peak_7425	chr11	8543505	8543831	+	968	NA	Intergenic	Intergenic	-21655	ENSDART00000081607.5	ENSDARG00000058696	tbl1xr1a	ENSDART00000169141			ENSDARG00000058696.7
CNE14_1_q0.3_peak_72370	chr6	59967805	59968209	+	968	NA	promoter-TSS (ENSDART00000050457.7)	-promoter-TSS (ENSDART00000050457.7)	13	ENSDART00000050457.7	ENSDARG00000034086	zgc.65895	ENSDART00000050457			ENSDARG00000034086.7
CNE14_1_q0.3_peak_29392	chr18	2837369	2838116	+	968	NA	intron (ENSDART00000171495.2, intron 1 of 7)	-intron (ENSDART00000160228.2, intron 1 of 7)	179	ENSDART00000171495.2	ENSDARG00000098832	fam168a	ENSDART00000171495			ENSDARG00000098832.2
CNE14_1_q0.3_peak_27253	chr17	25460605	25461053	+	968	NA	intron (ENSDART00000030691.6, intron 1 of 5)	-intron (ENSDART00000030691.6, intron 1 of 5)	-13014	ENSDART00000148592.2	ENSDARG00000022995	clic4	ENSDART00000148592			ENSDARG00000022995.7
CNE14_1_q0.3_peak_80496	chr9	1702714	1703158	+	967	NA	promoter-TSS (ENSDART00000102934.4)	-promoter-TSS (ENSDART00000102934.4)	-288	ENSDART00000102934.4	ENSDARG00000059351	hnrnpa3	ENSDART00000137210			ENSDARG00000059351.8
CNE14_1_q0.3_peak_55505	chr25	12493971	12494324	+	966	NA	promoter-TSS (ENSDART00000163508.2)	-promoter-TSS (ENSDART00000163508.2)	68	ENSDART00000163508.2	ENSDARG00000101127	map1lc3b	ENSDART00000163508			ENSDARG00000101127.2
CNE14_1_q0.3_peak_25588	chr17	310950	324484	+	966	NA	Intergenic	Intergenic	-20084	ENSDART00000194814.1	ENSDARG00000117326	#N/A	ENSDART00000194814			ENSDARG00000117326.1
CNE14_1_q0.3_peak_17568	chr14	30794329	30794673	+	966	NA	exon (ENSDART00000023054.10, exon 14 of 14)	-exon (ENSDART00000023054.10, exon 14 of 14)	-1058	ENSDART00000006132.8	ENSDARG00000021124	cfl1	ENSDART00000006132			ENSDARG00000021124.8
CNE14_1_q0.3_peak_5441	chr10	29816194	29816933	+	966	NA	promoter-TSS (ENSDART00000055913.6)	-promoter-TSS (ENSDART00000055913.6)	-96	ENSDART00000055913.6	ENSDARG00000068996	hist2h2l	ENSDART00000055913			ENSDARG00000068996.4
CNE14_1_q0.3_peak_75315	chr7	59649249	59649894	+	966	NA	promoter-TSS (ENSDART00000181067.1)	-promoter-TSS (ENSDART00000181067.1)	137	ENSDART00000146384.2	ENSDARG00000029500	rpl34	ENSDART00000123520			ENSDARG00000029500.8
CNE14_1_q0.3_peak_71223	chr6	51665308	51666302	+	965	NA	promoter-TSS (ENSDART00000028607.9)	-promoter-TSS (ENSDART00000028607.9)	-351	ENSDART00000028607.9	ENSDARG00000017244	chd6	ENSDART00000155549			ENSDARG00000017244.11
CNE14_1_q0.3_peak_6136	chr10	43036880	43037378	+	965	NA	promoter-TSS (ENSDART00000158829.2)	-promoter-TSS (ENSDART00000158829.2)	-4	ENSDART00000158829.2	ENSDARG00000104846	atg10	ENSDART00000193434			ENSDARG00000104846.3
CNE14_1_q0.3_peak_42511	chr20	53326467	53326997	+	964	NA	intron (ENSDART00000146001.4, intron 1 of 4)	-intron (ENSDART00000146001.4, intron 1 of 4)	-5233	ENSDART00000179894.1	ENSDARG00000060349	wasf1	ENSDART00000084952			ENSDARG00000060349.8
CNE14_1_q0.3_peak_44364	chr21	27188417	27189032	+	964	NA	promoter-TSS (ENSDART00000125349.3)	-promoter-TSS (ENSDART00000125349.3)	-766	ENSDART00000125349.3	ENSDARG00000087993	bada	ENSDART00000125349			ENSDARG00000087993.3
CNE14_1_q0.3_peak_36745	chr2	33686975	33687303	+	964	NA	promoter-TSS (ENSDART00000147439.2)	-promoter-TSS (ENSDART00000147439.2)	75	ENSDART00000147439.2	ENSDARG00000031681	atp6v0b	ENSDART00000147439			ENSDARG00000031681.7
CNE14_1_q0.3_peak_39036	chr20	1119042	1120118	+	963	NA	intron (ENSDART00000040680.7, intron 1 of 15)	-intron (ENSDART00000040680.7, intron 1 of 15)	476	ENSDART00000040680.7	ENSDARG00000032261	rngtt	ENSDART00000040680			ENSDARG00000032261.7
CNE14_1_q0.3_peak_38251	chr2	56131090	56131616	+	963	NA	promoter-TSS (ENSDART00000097755.6)	-promoter-TSS (ENSDART00000097755.6)	-41	ENSDART00000097755.6	ENSDARG00000067850	jund	ENSDART00000097755			ENSDARG00000067850.6
CNE14_1_q0.3_peak_53469	chr24	29619149	29619801	+	963	NA	Intergenic	Intergenic	-33393	ENSDART00000136763.2	ENSDARG00000086623	#N/A	ENSDART00000136763			ENSDARG00000086623.4
CNE14_1_q0.3_peak_27984	chr17	44440817	44441275	+	962	NA	promoter-TSS (ENSDART00000142123.2)	-promoter-TSS (ENSDART00000142123.2)	4	ENSDART00000142123.2	ENSDARG00000031533	ap5m1	ENSDART00000142123			ENSDARG00000031533.10
CNE14_1_q0.3_peak_43586	chr21	5888436	5888877	+	962	NA	promoter-TSS (ENSDART00000091331.7)	-promoter-TSS (ENSDART00000091331.7)	15	ENSDART00000091331.7	ENSDARG00000086746	prodha	ENSDART00000091331			ENSDARG00000086746.6
CNE14_1_q0.3_peak_56484	chr25	32496644	32497217	+	962	NA	promoter-TSS (ENSDART00000132698.2)	-promoter-TSS (ENSDART00000132698.2)	53	ENSDART00000132698.2	ENSDARG00000061587	ctdspl2a	ENSDART00000087978			ENSDARG00000061587.6
CNE14_1_q0.3_peak_30906	chr18	34549486	34549910	+	962	NA	promoter-TSS (ENSDART00000021880.7)	-promoter-TSS (ENSDART00000021880.7)	23	ENSDART00000137101.3	ENSDARG00000014165	ssr3	ENSDART00000137101			ENSDARG00000014165.8
CNE14_1_q0.3_peak_50969	chr23	33907673	33908141	+	961	NA	promoter-TSS (ENSDART00000159445.2)	-promoter-TSS (ENSDART00000159445.2)	8	ENSDART00000159445.2	ENSDARG00000103364	cs	ENSDART00000159445			ENSDARG00000103364.2
CNE14_1_q0.3_peak_72350	chr6	59853623	59854958	+	961	NA	promoter-TSS (ENSDART00000083499.6)	-promoter-TSS (ENSDART00000083499.6)	66	ENSDART00000157266.3	ENSDARG00000059794	kdm6al	ENSDART00000154398			ENSDARG00000059794.7
CNE14_1_q0.3_peak_27358	chr17	29345379	29346019	+	960	NA	promoter-TSS (ENSDART00000086164.6)	-promoter-TSS (ENSDART00000086164.6)	93	ENSDART00000086164.6	ENSDARG00000060854	kctd3	ENSDART00000188885			ENSDARG00000060854.7
CNE14_1_q0.3_peak_48009	chr22	35088387	35089667	+	960	NA	promoter-TSS (ENSDART00000076040.7)	-promoter-TSS (ENSDART00000076040.7)	-4	ENSDART00000076040.7	ENSDARG00000053918	srfa	ENSDART00000123066			ENSDARG00000053918.7
CNE14_1_q0.3_peak_50503	chr23	19103663	19104238	+	960	NA	promoter-TSS (ENSDART00000016901.8)	-promoter-TSS (ENSDART00000016901.8)	-95	ENSDART00000016901.8	ENSDARG00000003865	pard6b	ENSDART00000016901			ENSDARG00000003865.9
CNE14_1_q0.3_peak_67628	chr5	63050897	63051289	+	960	NA	intron (ENSDART00000161149.2, intron 1 of 4)	-intron (ENSDART00000161149.2, intron 1 of 4)	14819	ENSDART00000161149.2	ENSDARG00000098860	tlcd3a	ENSDART00000161149			ENSDARG00000098860.2
CNE14_1_q0.3_peak_82260	chr9	33788072	33789010	+	960	NA	promoter-TSS (ENSDART00000088469.7)	-promoter-TSS (ENSDART00000088469.7)	-85	ENSDART00000088469.7	ENSDARG00000061759	kdm6a	ENSDART00000144623			ENSDARG00000061759.9
CNE14_1_q0.3_peak_18220	chr14	46764232	46764592	+	960	NA	intron (ENSDART00000149571.3, intron 2 of 8)	-intron (ENSDART00000149571.3, intron 2 of 8)	41919	ENSDART00000185396.1	ENSDARG00000109256	#N/A	ENSDART00000185396			ENSDARG00000109256.1
CNE14_1_q0.3_peak_33606	chr19	27831493	27831828	+	960	NA	promoter-TSS (ENSDART00000131767.2)	-promoter-TSS (ENSDART00000131767.2)	-842	ENSDART00000131767.2	ENSDARG00000062114	tent4a	ENSDART00000131767			ENSDARG00000062114.7
CNE14_1_q0.3_peak_51708	chr23	44464320	44576206	+	959	NA	exon (ENSDART00000149903.3, exon 8 of 8)	-exon (ENSDART00000149903.3, exon 8 of 8)	22562	ENSDART00000149903.3	ENSDARG00000075024	si.ch73.375g18.1	ENSDART00000149903			ENSDARG00000075024.5
CNE14_1_q0.3_peak_3393	chr10	74340	74757	+	959	NA	promoter-TSS (ENSDART00000100073.5)	-promoter-TSS (ENSDART00000100073.5)	-124	ENSDART00000141723.2	ENSDARG00000063570	dyrk1aa	ENSDART00000144722			ENSDARG00000063570.7
CNE14_1_q0.3_peak_49010	chr23	2037177	2037895	+	959	NA	promoter-TSS (ENSDART00000191312.1)	-promoter-TSS (ENSDART00000191312.1)	30	ENSDART00000191312.1	ENSDARG00000006288	prdm5	ENSDART00000191312			ENSDARG00000006288.10
CNE14_1_q0.3_peak_55566	chr25	13833249	13834031	+	959	NA	exon (ENSDART00000158780.2, exon 2 of 11)	-exon (ENSDART00000158780.2, exon 2 of 11)	6103	ENSDART00000158780.2	ENSDARG00000102229	mapk8ip1a	ENSDART00000160258			ENSDARG00000102229.2
CNE14_1_q0.3_peak_69261	chr6	6490846	6491288	+	958	NA	promoter-TSS (ENSDART00000140827.2)	-promoter-TSS (ENSDART00000140827.2)	54	ENSDART00000140827.2	ENSDARG00000063153	bcl11ab	ENSDART00000140827			ENSDARG00000063153.7
CNE14_1_q0.3_peak_3296	chr1	59053390	59053889	+	958	NA	Intergenic	Intergenic	-8964	ENSDART00000162232.2	ENSDARG00000101915	pin1	ENSDART00000162232			ENSDARG00000101915.2
CNE14_1_q0.3_peak_59031	chr3	32410517	32410847	+	958	NA	promoter-TSS (ENSDART00000025496.10)	-promoter-TSS (ENSDART00000025496.10)	-64	ENSDART00000025496.10	ENSDARG00000006553	rras	ENSDART00000186287			ENSDARG00000006553.11
CNE14_1_q0.3_peak_24965	chr16	51072045	51073003	+	958	NA	promoter-TSS (ENSDART00000083777.6)	-promoter-TSS (ENSDART00000083777.6)	-118	ENSDART00000083777.6	ENSDARG00000059888	LOC567622	ENSDART00000083777			ENSDARG00000059888.6
CNE14_1_q0.3_peak_40076	chr20	7582514	7583143	+	957	NA	exon (ENSDART00000083890.6, exon 1 of 67)	-exon (ENSDART00000083890.6, exon 1 of 67)	108	ENSDART00000083890.6	ENSDARG00000059925	usp24	ENSDART00000144729			ENSDARG00000059925.8
CNE14_1_q0.3_peak_2312	chr1	41666325	41667001	+	957	NA	promoter-TSS (ENSDART00000145789.4)	-promoter-TSS (ENSDART00000145789.4)	52	ENSDART00000145789.4	ENSDARG00000078908	fbxo41	ENSDART00000145789			ENSDARG00000078908.7
CNE14_1_q0.3_peak_33532	chr19	25772936	25773246	+	957	NA	promoter-TSS (ENSDART00000052393.4)	-promoter-TSS (ENSDART00000052393.4)	-111	ENSDART00000052393.4	ENSDARG00000036090	pard6gb	ENSDART00000052393			ENSDARG00000036090.5
CNE14_1_q0.3_peak_862	chr1	9195503	9196097	+	956	NA	promoter-TSS (ENSDART00000143587.2)	-promoter-TSS (ENSDART00000143587.2)	-40	ENSDART00000192174.1	ENSDARG00000058475	ern2	ENSDART00000192174			ENSDARG00000058475.6
CNE14_1_q0.3_peak_81818	chr9	21793125	21793955	+	955	NA	promoter-TSS (ENSDART00000134915.3)	-promoter-TSS (ENSDART00000134915.3)	-25	ENSDART00000134915.3	ENSDARG00000018296	rev1	ENSDART00000169069			ENSDARG00000018296.11
CNE14_1_q0.3_peak_7840	chr11	16115757	16116081	+	955	NA	promoter-TSS (ENSDART00000143436.3)	-promoter-TSS (ENSDART00000143436.3)	-115	ENSDART00000143436.3	ENSDARG00000005738	rpf1	ENSDART00000143436			ENSDARG00000005738.12
CNE14_1_q0.3_peak_82597	chr9	44215843	44216164	+	955	NA	intron (ENSDART00000110411.4, intron 3 of 12)	-intron (ENSDART00000110411.4, intron 3 of 12)	73633	ENSDART00000110411.4	ENSDARG00000079397	cerkl	ENSDART00000110411			ENSDARG00000079397.5
CNE14_1_q0.3_peak_40493	chr20	16452521	16452839	+	955	NA	intron (ENSDART00000152813.2, intron 1 of 3)	-intron (ENSDART00000006443.7, intron 1 of 9)	922	ENSDART00000006443.7	ENSDARG00000011000	gtf2a1	ENSDART00000006443			ENSDARG00000011000.9
CNE14_1_q0.3_peak_2558	chr1	47771091	47771901	+	955	NA	intron (ENSDART00000101079.5, intron 1 of 5)	-intron (ENSDART00000101079.5, intron 1 of 5)	246	ENSDART00000101079.5	ENSDARG00000069438	neurl1aa	ENSDART00000101079			ENSDARG00000069438.5
CNE14_1_q0.3_peak_51727	chr23	44722967	44723597	+	954	NA	promoter-TSS (ENSDART00000129138.3)	-promoter-TSS (ENSDART00000129138.3)	-180	ENSDART00000129138.3	ENSDARG00000086481	mogat3a	ENSDART00000129138			ENSDARG00000086481.3
CNE14_1_q0.3_peak_61762	chr4	22519144	22519707	+	954	NA	promoter-TSS (ENSDART00000002851.9)	-promoter-TSS (ENSDART00000002851.9)	91	ENSDART00000130409.3	ENSDARG00000018111	kdm7aa	ENSDART00000186258			ENSDARG00000018111.9
CNE14_1_q0.3_peak_45718	chr21	45247751	45294078	+	954	NA	intron (ENSDART00000157136.3, intron 2 of 9)	-intron (ENSDART00000155681.3, intron 2 of 10)	2802	ENSDART00000157136.3	ENSDARG00000038672	tcf7	ENSDART00000192632			ENSDARG00000038672.9
CNE14_1_q0.3_peak_29802	chr18	9708583	9708910	+	954	NA	exon (ENSDART00000173169.2, exon 1 of 4)	-exon (ENSDART00000173169.2, exon 1 of 4)	171	ENSDART00000173169.2	ENSDARG00000098880	pclob	ENSDART00000173169			ENSDARG00000098880.3
CNE14_1_q0.3_peak_53114	chr24	20507967	20508383	+	954	NA	intron (ENSDART00000172298.2, intron 1 of 7)	-intron (ENSDART00000089428.7, intron 1 of 6)	-6874	ENSDART00000140651.2	ENSDARG00000071673	ctdspla	ENSDART00000140651			ENSDARG00000071673.6
CNE14_1_q0.3_peak_76698	chr8	621899	622277	+	953	NA	promoter-TSS (ENSDART00000050352.8)	-promoter-TSS (ENSDART00000050352.8)	-131	ENSDART00000050352.8	ENSDARG00000030129	si.ch211.87m7.2	ENSDART00000187576			ENSDARG00000030129.9
CNE14_1_q0.3_peak_43459	chr21	5006978	5007330	+	953	NA	promoter-TSS (ENSDART00000097796.5)	-promoter-TSS (ENSDART00000097796.5)	9	ENSDART00000146766.3	ENSDARG00000077906	rnf165a	ENSDART00000146766			ENSDARG00000077906.6
CNE14_1_q0.3_peak_34116	chr19	42076230	42077215	+	953	NA	intron (ENSDART00000191058.1, intron 1 of 10)	-intron (ENSDART00000166422.2, intron 1 of 10)	4842	ENSDART00000191058.1	ENSDARG00000070151	nfyc	ENSDART00000191058			ENSDARG00000070151.8
CNE14_1_q0.3_peak_74996	chr7	52761665	52762381	+	952	NA	TTS (ENSDART00000053814.8)	-TTS (ENSDART00000053814.8)	182	ENSDART00000111444.5	ENSDARG00000076143	ppip5k1a	ENSDART00000111444			ENSDARG00000076143.5
CNE14_1_q0.3_peak_54222	chr24	39518539	39519358	+	952	NA	promoter-TSS (ENSDART00000031486.9)	-promoter-TSS (ENSDART00000031486.9)	174	ENSDART00000132939.4	ENSDARG00000011493	dcun1d3	ENSDART00000132939			ENSDARG00000011493.11
CNE14_1_q0.3_peak_75886	chr7	69635803	69636646	+	952	NA	exon (ENSDART00000126739.3, exon 1 of 10)	-exon (ENSDART00000126739.3, exon 1 of 10)	278	ENSDART00000126739.3	ENSDARG00000086033	tspan5a	ENSDART00000126739			ENSDARG00000086033.4
CNE14_1_q0.3_peak_14317	chr13	36582194	36582519	+	951	NA	promoter-TSS (ENSDART00000113204.4)	-promoter-TSS (ENSDART00000113204.4)	-15	ENSDART00000137335.2	ENSDARG00000077850	lgals3a	ENSDART00000113204			ENSDARG00000077850.5
CNE14_1_q0.3_peak_51064	chr23	36373598	36374089	+	951	NA	Intergenic	Intergenic	33323	ENSDART00000011201.7	ENSDARG00000017844	copz1	ENSDART00000011201			ENSDARG00000017844.7
CNE14_1_q0.3_peak_33492	chr19	24135485	24135831	+	950	NA	intron (ENSDART00000189505.1, intron 1 of 3)	-intron (ENSDART00000104087.6, intron 1 of 4)	166	ENSDART00000104087.6	ENSDARG00000070704	thap7	ENSDART00000104087			ENSDARG00000070704.7
CNE14_1_q0.3_peak_67521	chr5	60885719	60886806	+	950	NA	promoter-TSS (ENSDART00000128350.2)	-promoter-TSS (ENSDART00000128350.2)	159	ENSDART00000009298.9	ENSDARG00000018825	tmem248	ENSDART00000009298			ENSDARG00000018825.9
CNE14_1_q0.3_peak_36278	chr2	18988048	18988423	+	950	NA	promoter-TSS (ENSDART00000170216.2)	-promoter-TSS (ENSDART00000170216.2)	-172	ENSDART00000170216.2	ENSDARG00000099776	glula	ENSDART00000170216			ENSDARG00000099776.2
CNE14_1_q0.3_peak_74321	chr7	34472626	34683734	+	949	NA	intron (ENSDART00000173784.2, intron 3 of 25)	-intron (ENSDART00000173784.2, intron 3 of 25)	-7821	ENSDART00000173639.2	ENSDARG00000051768	fhod1	ENSDART00000173817			ENSDARG00000051768.7
CNE14_1_q0.3_peak_81231	chr9	10145619	10145953	+	949	NA	promoter-TSS (ENSDART00000004745.8)	-promoter-TSS (ENSDART00000004745.8)	9	ENSDART00000004745.8	ENSDARG00000012796	hnmt	ENSDART00000004745			ENSDARG00000012796.9
CNE14_1_q0.3_peak_74746	chr7	46689094	46689454	+	949	NA	Intergenic	Intergenic	54806	ENSDART00000193328.1	ENSDARG00000103361	tshz3b	ENSDART00000193954			ENSDARG00000103361.3
CNE14_1_q0.3_peak_66928	chr5	47762485	47764845	+	949	NA	Intergenic	Intergenic	-15295	ENSDART00000119277.3	ENSDARG00000098516	#N/A	ENSDART00000119277			ENSDARG00000098516.2
CNE14_1_q0.3_peak_53172	chr24	21511012	21511767	+	948	NA	intron (ENSDART00000109587.3, intron 1 of 3)	-intron (ENSDART00000109587.3, intron 1 of 3)	348	ENSDART00000109587.3	ENSDARG00000077955	rnf6	ENSDART00000109587			ENSDARG00000077955.4
CNE14_1_q0.3_peak_49207	chr23	3408901	3409323	+	948	NA	promoter-TSS (ENSDART00000002309.8)	-promoter-TSS (ENSDART00000002309.8)	28	ENSDART00000002309.8	ENSDARG00000017121	mafba	ENSDART00000193245			ENSDARG00000017121.8
CNE14_1_q0.3_peak_3297	chr1	59058751	59059120	+	947	NA	Intergenic	Intergenic	-3668	ENSDART00000162232.2	ENSDARG00000101915	pin1	ENSDART00000162232			ENSDARG00000101915.2
CNE14_1_q0.3_peak_78979	chr8	43727005	43727552	+	947	NA	Intergenic	Intergenic	-5919	ENSDART00000166581.2	ENSDARG00000100965	ep400	ENSDART00000159904			ENSDARG00000100965.2
CNE14_1_q0.3_peak_83037	chr9	50001410	50001803	+	947	NA	promoter-TSS (ENSDART00000058892.7)	-promoter-TSS (ENSDART00000058892.7)	0	ENSDART00000161648.3	ENSDARG00000086819	scn1laa	ENSDART00000168514			ENSDARG00000086819.6
CNE14_1_q0.3_peak_22916	chr16	7828655	7829043	+	947	NA	promoter-TSS (ENSDART00000108653.5)	-promoter-TSS (ENSDART00000108653.5)	-1	ENSDART00000108653.5	ENSDARG00000079881	tcaim	ENSDART00000191434			ENSDARG00000079881.5
CNE14_1_q0.3_peak_43295	chr21	3415177	3415546	+	947	NA	Intergenic	Intergenic	7274	ENSDART00000150975.2	ENSDARG00000016858	smad7	ENSDART00000009740			ENSDARG00000016858.8
CNE14_1_q0.3_peak_58567	chr3	18109527	18110037	+	947	NA	Intergenic	Intergenic	12082	ENSDART00000021634.8	ENSDARG00000013460	wfikkn2a	ENSDART00000021634			ENSDARG00000013460.9
CNE14_1_q0.3_peak_10408	chr12	14451921	14452942	+	947	NA	Intergenic	Intergenic	98646	ENSDART00000188717.1	ENSDARG00000112601	#N/A	ENSDART00000188717			ENSDARG00000112601.1
CNE14_1_q0.3_peak_81771	chr9	21204115	21204872	+	946	NA	promoter-TSS (ENSDART00000117985.2)	-promoter-TSS (ENSDART00000117985.2)	-123	ENSDART00000117985.2	ENSDARG00000083520	#N/A	ENSDART00000117985			ENSDARG00000083520.2
CNE14_1_q0.3_peak_31785	chr18	48759989	48760419	+	946	NA	exon (ENSDART00000060098.5, exon 2 of 2)	-exon (ENSDART00000060098.5, exon 2 of 2)	1288	ENSDART00000060098.5	ENSDARG00000041011	gemin7	ENSDART00000060098			ENSDARG00000041011.5
CNE14_1_q0.3_peak_48302	chr22	37017873	37018195	+	946	NA	Intergenic	Intergenic	-10669	ENSDART00000157966.2	ENSDARG00000101094	si.dkey.211e20.10	ENSDART00000157966			ENSDARG00000101094.2
CNE14_1_q0.3_peak_23353	chr16	15407619	15408001	+	945	NA	Intergenic	Intergenic	-20351	ENSDART00000053754.7	ENSDARG00000036987	has2	ENSDART00000053754			ENSDARG00000036987.8
CNE14_1_q0.3_peak_22762	chr16	5276484	5276844	+	945	NA	promoter-TSS (ENSDART00000133972.3)	-promoter-TSS (ENSDART00000133972.3)	-12	ENSDART00000133972.3	ENSDARG00000021987	plecb	ENSDART00000137399			ENSDARG00000021987.11
CNE14_1_q0.3_peak_77250	chr8	4443485	4443943	+	944	NA	TTS (ENSDART00000132540.3)	-TTS (ENSDART00000132540.3)	-2721	ENSDART00000155635.2	ENSDARG00000097016	#N/A	ENSDART00000155635			ENSDARG00000097016.2
CNE14_1_q0.3_peak_34458	chr19	46565120	46566933	+	944	NA	exon (ENSDART00000166668.2, exon 1 of 11)	-exon (ENSDART00000166668.2, exon 1 of 11)	404	ENSDART00000166668.2	ENSDARG00000101019	ext1b	ENSDART00000166668			ENSDARG00000101019.2
CNE14_1_q0.3_peak_58384	chr3	13189759	13190203	+	944	NA	promoter-TSS (ENSDART00000109876.4)	-promoter-TSS (ENSDART00000109876.4)	-31	ENSDART00000109876.4	ENSDARG00000055350	sun1	ENSDART00000109876			ENSDARG00000055350.8
CNE14_1_q0.3_peak_67429	chr5	57743722	57744067	+	944	NA	promoter-TSS (ENSDART00000005090.9)	-promoter-TSS (ENSDART00000005090.9)	79	ENSDART00000005090.9	ENSDARG00000012840	alg9	ENSDART00000005090			ENSDARG00000012840.11
CNE14_1_q0.3_peak_7800	chr11	15296552	15297358	+	943	NA	promoter-TSS (ENSDART00000124968.3)	-promoter-TSS (ENSDART00000124968.3)	-150	ENSDART00000124968.3	ENSDARG00000009724	rpn2	ENSDART00000165010			ENSDARG00000009724.9
CNE14_1_q0.3_peak_66374	chr5	35200159	35200904	+	942	NA	promoter-TSS (ENSDART00000051271.7)	-promoter-TSS (ENSDART00000051271.7)	59	ENSDART00000051271.7	ENSDARG00000035389	fcho2	ENSDART00000141218			ENSDARG00000035389.9
CNE14_1_q0.3_peak_59175	chr3	36190512	36190904	+	942	NA	intron (ENSDART00000175208.2, intron 2 of 8)	-intron (ENSDART00000025326.7, intron 2 of 8)	-18740	ENSDART00000193083.1	ENSDARG00000110352	#N/A	ENSDART00000193083			ENSDARG00000110352.1
CNE14_1_q0.3_peak_74519	chr7	40630506	40630894	+	942	NA	promoter-TSS (ENSDART00000134547.4)	-promoter-TSS (ENSDART00000134547.4)	-2	ENSDART00000134547.4	ENSDARG00000035978	ube3c	ENSDART00000173670			ENSDARG00000035978.9
CNE14_1_q0.3_peak_10617	chr12	17344150	17344472	+	942	NA	Intergenic	Intergenic	-1239	ENSDART00000119418.2	ENSDARG00000084018	#N/A	ENSDART00000119418			ENSDARG00000084018.2
CNE14_1_q0.3_peak_73683	chr7	17796232	17796559	+	942	NA	intron (ENSDART00000165110.3, intron 4 of 6)	-intron (ENSDART00000165110.3, intron 4 of 6)	13959	ENSDART00000165110.3	ENSDARG00000104840	si.dkey.28a3.2	ENSDART00000165110			ENSDARG00000104840.3
CNE14_1_q0.3_peak_21532	chr15	44116656	44117016	+	942	NA	exon (ENSDART00000078086.5, exon 1 of 7)	-exon (ENSDART00000078086.5, exon 1 of 7)	454	ENSDART00000078086.5	ENSDARG00000055690	LOC100535121	ENSDART00000078086			ENSDARG00000055690.5
CNE14_1_q0.3_peak_66486	chr5	36948758	36949505	+	941	NA	promoter-TSS (ENSDART00000193606.1)	-promoter-TSS (ENSDART00000193606.1)	345	ENSDART00000047269.7	ENSDARG00000033009	h3f3c	ENSDART00000047269			ENSDARG00000033009.7
CNE14_1_q0.3_peak_73563	chr7	14381217	14381564	+	941	NA	promoter-TSS (ENSDART00000161442.3)	-promoter-TSS (ENSDART00000161442.3)	-21	ENSDART00000161442.3	ENSDARG00000101584	#N/A	ENSDART00000161442			ENSDARG00000101584.3
CNE14_1_q0.3_peak_79393	chr8	50150691	50151256	+	941	NA	exon (ENSDART00000056074.6, exon 1 of 13)	-exon (ENSDART00000056074.6, exon 1 of 13)	139	ENSDART00000056074.6	ENSDARG00000038422	entpd4	ENSDART00000056074			ENSDARG00000038422.6
CNE14_1_q0.3_peak_6394	chr11	166202	191434	+	941	NA	intron (ENSDART00000168562.2, intron 4 of 19)	-intron (ENSDART00000168562.2, intron 4 of 19)	4510	ENSDART00000168562.2	ENSDARG00000059342	avil	ENSDART00000168562			ENSDARG00000059342.7
CNE14_1_q0.3_peak_84074	chrKN149803.1	9587	10013	+	941	NA	NA	NA	NA	NA
CNE14_1_q0.3_peak_3386	chr10	38928	39244	+	940	NA	intron (ENSDART00000194542.1, intron 2 of 3)	-intron (ENSDART00000194542.1, intron 2 of 3)	6400	ENSDART00000194542.1	ENSDARG00000117824	#N/A	ENSDART00000194542			ENSDARG00000117824.1
CNE14_1_q0.3_peak_66938	chr5	47863156	47863553	+	940	NA	exon (ENSDART00000051518.7, exon 1 of 26)	-exon (ENSDART00000051518.7, exon 1 of 26)	201	ENSDART00000051518.7	ENSDARG00000035535	rasa1a	ENSDART00000149316			ENSDARG00000035535.9
CNE14_1_q0.3_peak_82257	chr9	33608635	33609137	+	939	NA	promoter-TSS (ENSDART00000100849.5)	-promoter-TSS (ENSDART00000100849.5)	-459	ENSDART00000100849.5	ENSDARG00000059809	caska	ENSDART00000144150			ENSDARG00000059809.7
CNE14_1_q0.3_peak_58222	chr3	11700404	11700830	+	939	NA	Intergenic	Intergenic	-75923	ENSDART00000127157.3	ENSDARG00000074752	hlfa	ENSDART00000127157			ENSDARG00000074752.5
CNE14_1_q0.3_peak_45911	chr22	833942	834448	+	939	NA	promoter-TSS (ENSDART00000105873.6)	-promoter-TSS (ENSDART00000105873.6)	-89	ENSDART00000105873.6	ENSDARG00000011890	cry4	ENSDART00000105873			ENSDARG00000011890.10
CNE14_1_q0.3_peak_5589	chr10	34031393	34179391	+	937	NA	TTS (ENSDART00000132116.3)	-TTS (ENSDART00000132116.3)	2527	ENSDART00000167428.2	ENSDARG00000117202	pimr144	ENSDART00000140070			ENSDARG00000117202.1
CNE14_1_q0.3_peak_81905	chr9	23242448	23242821	+	937	NA	promoter-TSS (ENSDART00000053282.6)	-promoter-TSS (ENSDART00000053282.6)	50	ENSDART00000179770.1	ENSDARG00000036685	ccnt2a	ENSDART00000053282			ENSDARG00000036685.7
CNE14_1_q0.3_peak_10374	chr12	13344787	13345142	+	937	NA	promoter-TSS (ENSDART00000089017.5)	-promoter-TSS (ENSDART00000089017.5)	68	ENSDART00000089017.5	ENSDARG00000055563	drosha	ENSDART00000181373			ENSDARG00000055563.6
CNE14_1_q0.3_peak_25179	chr16	52733182	52733662	+	937	NA	promoter-TSS (ENSDART00000056101.6)	-promoter-TSS (ENSDART00000056101.6)	14	ENSDART00000056101.6	ENSDARG00000052789	azin1a	ENSDART00000147236			ENSDARG00000052789.7
CNE14_1_q0.3_peak_33734	chr19	31686105	31686574	+	937	NA	promoter-TSS (ENSDART00000131721.4)	-promoter-TSS (ENSDART00000131721.4)	-87	ENSDART00000131721.4	ENSDARG00000061752	ripor2	ENSDART00000088427			ENSDARG00000061752.8
CNE14_1_q0.3_peak_60317	chr3	57530096	57530456	+	936	NA	promoter-TSS (ENSDART00000003066.9)	-promoter-TSS (ENSDART00000003066.9)	47	ENSDART00000003066.9	ENSDARG00000076742	cyth1a	ENSDART00000003066			ENSDARG00000076742.5
CNE14_1_q0.3_peak_53764	chr24	36270739	36271510	+	936	NA	promoter-TSS (ENSDART00000154858.2)	-promoter-TSS (ENSDART00000154858.2)	228	ENSDART00000153682.3	ENSDARG00000097264	si.ch211.40k21.5	ENSDART00000155892			ENSDARG00000097264.3
CNE14_1_q0.3_peak_37493	chr2	47739450	47740606	+	936	NA	intron (ENSDART00000189180.1, intron 1 of 9)	-intron (ENSDART00000124307.4, intron 1 of 9)	-14021	ENSDART00000074929.6	ENSDARG00000052978	mbnl1	ENSDART00000074924			ENSDARG00000052978.8
CNE14_1_q0.3_peak_70291	chr6	26948000	26948371	+	936	NA	promoter-TSS (ENSDART00000153595.3)	-promoter-TSS (ENSDART00000153595.3)	26	ENSDART00000155847.2	ENSDARG00000016429	farp2	ENSDART00000155847			ENSDARG00000016429.11
CNE14_1_q0.3_peak_7967	chr11	19576597	19577272	+	936	NA	promoter-TSS (ENSDART00000157847.2)	-promoter-TSS (ENSDART00000157847.2)	-44	ENSDART00000157847.2	ENSDARG00000074804	atxn7	ENSDART00000157847			ENSDARG00000074804.4
CNE14_1_q0.3_peak_50358	chr23	18415449	18415972	+	935	NA	exon (ENSDART00000135430.2, exon 1 of 16)	-exon (ENSDART00000135430.2, exon 1 of 16)	162	ENSDART00000135430.2	ENSDARG00000019205	fam120c	ENSDART00000135430			ENSDARG00000019205.11
CNE14_1_q0.3_peak_53550	chr24	31709569	31710114	+	935	NA	Intergenic	Intergenic	20739	ENSDART00000156493.3	ENSDARG00000096998	#N/A	ENSDART00000156607			ENSDARG00000096998.3
CNE14_1_q0.3_peak_73636	chr7	16598048	16598375	+	935	NA	promoter-TSS (ENSDART00000128488.4)	-promoter-TSS (ENSDART00000128488.4)	1	ENSDART00000128488.4	ENSDARG00000057323	e2f8	ENSDART00000131726			ENSDARG00000057323.8
CNE14_1_q0.3_peak_20715	chr15	29556524	29557157	+	935	NA	promoter-TSS (ENSDART00000060049.7)	-promoter-TSS (ENSDART00000060049.7)	-83	ENSDART00000060049.7	ENSDARG00000040984	hspa13	ENSDART00000060049			ENSDARG00000040984.7
CNE14_1_q0.3_peak_4898	chr10	13772706	13773153	+	935	NA	promoter-TSS (ENSDART00000145103.3)	-promoter-TSS (ENSDART00000145103.3)	-68	ENSDART00000184491.1	ENSDARG00000028661	cntfr	ENSDART00000145103			ENSDARG00000028661.9
CNE14_1_q0.3_peak_47253	chr22	24214607	24215382	+	935	NA	promoter-TSS (ENSDART00000162227.2)	-promoter-TSS (ENSDART00000162227.2)	-13	ENSDART00000162227.2	ENSDARG00000100944	glrx2	ENSDART00000167996			ENSDARG00000100944.2
CNE14_1_q0.3_peak_70638	chr6	37422565	37423063	+	934	NA	promoter-TSS (ENSDART00000138351.2)	-promoter-TSS (ENSDART00000138351.2)	27	ENSDART00000138351.2	ENSDARG00000074301	cth	ENSDART00000138351			ENSDARG00000074301.4
CNE14_1_q0.3_peak_82589	chr9	44015645	44016085	+	933	NA	Intergenic	Intergenic	-18925	ENSDART00000166110.2	ENSDARG00000103056	itga4	ENSDART00000162406			ENSDARG00000103056.3
CNE14_1_q0.3_peak_58654	chr3	20792795	20793720	+	933	NA	intron (ENSDART00000159457.2, intron 1 of 11)	-intron (ENSDART00000159457.2, intron 1 of 11)	398	ENSDART00000159457.2	ENSDARG00000100519	spop	ENSDART00000163473			ENSDARG00000100519.2
CNE14_1_q0.3_peak_39520	chr20	4030698	4031276	+	933	NA	exon (ENSDART00000112053.4, exon 1 of 2)	-exon (ENSDART00000112053.4, exon 1 of 2)	488	ENSDART00000112053.4	ENSDARG00000079979	#N/A	ENSDART00000112053			ENSDARG00000079979.4
CNE14_1_q0.3_peak_47499	chr22	29335844	29336557	+	933	NA	promoter-TSS (ENSDART00000132776.2)	-promoter-TSS (ENSDART00000132776.2)	68	ENSDART00000132776.2	ENSDARG00000086778	si.ch211.79m20.1	ENSDART00000132776			ENSDARG00000086778.4
CNE14_1_q0.3_peak_14063	chr13	28784147	28784574	+	933	NA	Intergenic	Intergenic	-1454	ENSDART00000039028.8	ENSDARG00000024311	nsmce4a	ENSDART00000039028			ENSDARG00000024311.9
CNE14_1_q0.3_peak_24588	chr16	46253374	46253774	+	932	NA	Intergenic	Intergenic	-36665	ENSDART00000116998.2	ENSDARG00000082380	#N/A	ENSDART00000116998			ENSDARG00000082380.2
CNE14_1_q0.3_peak_49896	chr23	10253964	10254423	+	932	NA	promoter-TSS (ENSDART00000081215.5)	-promoter-TSS (ENSDART00000081215.5)	95	ENSDART00000081215.5	ENSDARG00000058358	krt8	ENSDART00000137533			ENSDARG00000058358.5
CNE14_1_q0.3_peak_14288	chr13	35907973	35908381	+	932	NA	promoter-TSS (ENSDART00000013961.7)	-promoter-TSS (ENSDART00000013961.7)	98	ENSDART00000013961.7	ENSDARG00000006003	mycla	ENSDART00000147522			ENSDARG00000006003.8
CNE14_1_q0.3_peak_13339	chr13	11478257	11478810	+	931	NA	Intergenic	Intergenic	33133	ENSDART00000169045.2	ENSDARG00000101339	#N/A	ENSDART00000169045			ENSDARG00000101339.2
CNE14_1_q0.3_peak_51728	chr23	44732502	44733786	+	931	NA	intron (ENSDART00000172268.2, intron 1 of 2)	-intron (ENSDART00000160044.2, intron 1 of 6)	278	ENSDART00000172268.2	ENSDARG00000099203	atp1b2a	ENSDART00000164455			ENSDARG00000099203.2
CNE14_1_q0.3_peak_64531	chr5	3090910	3092215	+	931	NA	Intergenic	Intergenic	22856	ENSDART00000183112.1	ENSDARG00000104686	hsf5	ENSDART00000183112			ENSDARG00000104686.2
CNE14_1_q0.3_peak_79141	chr8	47151800	47152258	+	930	NA	promoter-TSS (ENSDART00000024320.11)	-promoter-TSS (ENSDART00000024320.11)	-6	ENSDART00000128057.3	ENSDARG00000004757	ybx1	ENSDART00000163922			ENSDARG00000004757.11
CNE14_1_q0.3_peak_46723	chr22	10415874	10416706	+	930	NA	Intergenic	Intergenic	-18610	ENSDART00000142886.3	ENSDARG00000043077	nisch	ENSDART00000142886			ENSDARG00000043077.9
CNE14_1_q0.3_peak_70293	chr6	26972468	26972944	+	930	NA	intron (ENSDART00000153595.3, intron 2 of 26)	-intron (ENSDART00000153595.3, intron 2 of 26)	24547	ENSDART00000155847.2	ENSDARG00000016429	farp2	ENSDART00000155847			ENSDARG00000016429.11
CNE14_1_q0.3_peak_2495	chr1	46983409	46984261	+	930	NA	intron (ENSDART00000125032.3, intron 1 of 9)	-intron (ENSDART00000125032.3, intron 1 of 9)	307	ENSDART00000125032.3	ENSDARG00000036542	pknox1.2	ENSDART00000130607			ENSDARG00000036542.8
CNE14_1_q0.3_peak_66221	chr5	31480103	31480624	+	929	NA	promoter-TSS (ENSDART00000098197.5)	-promoter-TSS (ENSDART00000098197.5)	21	ENSDART00000098197.5	ENSDARG00000035471	si.dkey.220k22.1	ENSDART00000098197			ENSDARG00000035471.7
CNE14_1_q0.3_peak_14849	chr13	47403252	47403597	+	929	NA	promoter-TSS (ENSDART00000114318.3)	-promoter-TSS (ENSDART00000114318.3)	19	ENSDART00000147944.2	ENSDARG00000079144	bcl2l11	ENSDART00000114318			ENSDARG00000079144.5
CNE14_1_q0.3_peak_54727	chr25	1470419	1471542	+	929	NA	exon (ENSDART00000154130.2, exon 1 of 2)	-exon (ENSDART00000154130.2, exon 1 of 2)	205	ENSDART00000154130.2	ENSDARG00000097252	#N/A	ENSDART00000154130			ENSDARG00000097252.2
CNE14_1_q0.3_peak_8254	chr11	27537459	27537795	+	929	NA	promoter-TSS (ENSDART00000088177.7)	-promoter-TSS (ENSDART00000088177.7)	23	ENSDART00000172895.2	ENSDARG00000061656	ptpdc1a	ENSDART00000173444			ENSDARG00000061656.7
CNE14_1_q0.3_peak_33144	chr19	16030559	16030875	+	928	NA	exon (ENSDART00000187135.1, exon 18 of 18)	-exon (ENSDART00000187135.1, exon 18 of 18)	-1274	ENSDART00000118384.2	ENSDARG00000081931	#N/A	ENSDART00000118384			ENSDARG00000081931.2
CNE14_1_q0.3_peak_78855	chr8	41273212	41273852	+	928	NA	promoter-TSS (ENSDART00000190598.1)	-promoter-TSS (ENSDART00000190598.1)	-71	ENSDART00000190598.1	ENSDARG00000079687	rnf10	ENSDART00000190598			ENSDARG00000079687.5
CNE14_1_q0.3_peak_41557	chr20	45660806	45661183	+	928	NA	promoter-TSS (ENSDART00000124582.3)	-promoter-TSS (ENSDART00000124582.3)	55	ENSDART00000124582.3	ENSDARG00000069101	napbb	ENSDART00000124582			ENSDARG00000069101.6
CNE14_1_q0.3_peak_68535	chr5	72376887	72377334	+	928	NA	promoter-TSS (ENSDART00000160479.2)	-promoter-TSS (ENSDART00000160479.2)	-137	ENSDART00000164969.2	ENSDARG00000099908	#N/A	ENSDART00000164969			ENSDARG00000099908.2
CNE14_1_q0.3_peak_58471	chr3	15817453	15817857	+	927	NA	promoter-TSS (ENSDART00000055787.6)	-promoter-TSS (ENSDART00000055787.6)	11	ENSDART00000055787.6	ENSDARG00000038281	natd1	ENSDART00000055787			ENSDARG00000038281.5
CNE14_1_q0.3_peak_84668	chrKN150670.1	31923	32452	+	927	NA	NA	NA	NA	NA
CNE14_1_q0.3_peak_62972	chr4	54675651	54677128	+	927	NA	Intergenic	Intergenic	30735	ENSDART00000192864.1	ENSDARG00000104968	#N/A	ENSDART00000190527			ENSDARG00000104968.2
CNE14_1_q0.3_peak_29987	chr18	16011353	16011916	+	926	NA	intron (ENSDART00000061134.7, intron 37 of 41)	-intron (ENSDART00000061134.7, intron 37 of 41)	-41821	ENSDART00000189163.1	ENSDARG00000111261	#N/A	ENSDART00000188269			ENSDARG00000111261.1
CNE14_1_q0.3_peak_31601	chr18	46968800	46969376	+	926	NA	Intergenic	Intergenic	-11248	ENSDART00000182754.1	ENSDARG00000074258	gramd1bb	ENSDART00000182754			ENSDARG00000074258.4
CNE14_1_q0.3_peak_66276	chr5	32591536	32592485	+	926	NA	Intergenic	Intergenic	-45638	ENSDART00000123439.2	ENSDARG00000090214	#N/A	ENSDART00000123439			ENSDARG00000090214.2
CNE14_1_q0.3_peak_13701	chr13	18649236	18649889	+	926	NA	TTS (ENSDART00000186804.1)	-TTS (ENSDART00000186804.1)	120	ENSDART00000186804.1	ENSDARG00000115204	#N/A	ENSDART00000186804			ENSDARG00000115204.1
CNE14_1_q0.3_peak_34350	chr19	45650774	45651182	+	925	NA	promoter-TSS (ENSDART00000163504.2)	-promoter-TSS (ENSDART00000163504.2)	16	ENSDART00000163504.2	ENSDARG00000104082	trps1	ENSDART00000163920			ENSDARG00000104082.2
CNE14_1_q0.3_peak_81947	chr9	24412946	24413295	+	924	NA	promoter-TSS (ENSDART00000135897.2)	-promoter-TSS (ENSDART00000135897.2)	-112	ENSDART00000135897.2	ENSDARG00000051824	tmeff2a	ENSDART00000135897			ENSDARG00000051824.7
CNE14_1_q0.3_peak_55247	chr25	5694985	5695388	+	924	NA	Intergenic	Intergenic	45148	ENSDART00000169622.2	ENSDARG00000105296	ap3b2	ENSDART00000168720			ENSDARG00000105296.3
CNE14_1_q0.3_peak_30072	chr18	18667093	18667587	+	924	NA	promoter-TSS (ENSDART00000100401.6)	-promoter-TSS (ENSDART00000100401.6)	76	ENSDART00000100401.6	ENSDARG00000069142	aars1	ENSDART00000100401			ENSDARG00000069142.8
[truncated: 1,046,735+ more rows]
